# Supplementary material for: Xanthine–Dopamine Hybrid Molecules as Multitarget Drugs with Potential for the Treatment of Neurodegenerative Diseases
Source: MDPI journal article supplement (doi:10.3390/biom13071079), 2023-07-05

## **Supplementary material**

### **Xanthine-dopamine hybrid molecules as multitarget drugs with potential for the treatment of neurodegenerative diseases**

<sup>1</sup>#Michał Załuski, <sup>1</sup>#Tadeusz Karcz, <sup>1</sup>Anna Drabczyńska, <sup>2</sup>Christin Vielmuth, <sup>1</sup>Agnieszka Olejarz-Maciej, <sup>3</sup>Monika Głuch-Lutwin, <sup>3</sup>Barbara Mordyl, <sup>3</sup>Agata Siwek, <sup>4</sup>Grzegorz Satała, <sup>2</sup>Christa E. Müller, <sup>1</sup>Katarzyna Kieć-Kononowicz

<sup>1</sup>Department of Technology and Biotechnology of Drugs, Faculty of Pharmacy, Jagiellonian University Medical College, Kraków, Poland

<sup>2</sup>PharmaCenter Bonn, Pharmaceutical Institute, Pharmaceutical & Medicinal Chemistry, University of Bonn, Bonn, Germany

<sup>3</sup>Department of Pharmacobiology, Faculty of Pharmacy, Jagiellonian University Medical College, Kraków, Poland

<sup>4</sup>Department of Medicinal Chemistry, Maj Institute of Pharmacology, Polish Academy of Sciences, Kraków, Poland

# These authors contributed equally to this work

\* Correspondence: mfkono@cyf-kr.edu.pl; Tel./fax: +48-12-620-55-80/ +48-12-620-55-96 (K.K.); t.karcz@uj.edu.pl; Tel.: +48-12-620-55-92 (T.K.)

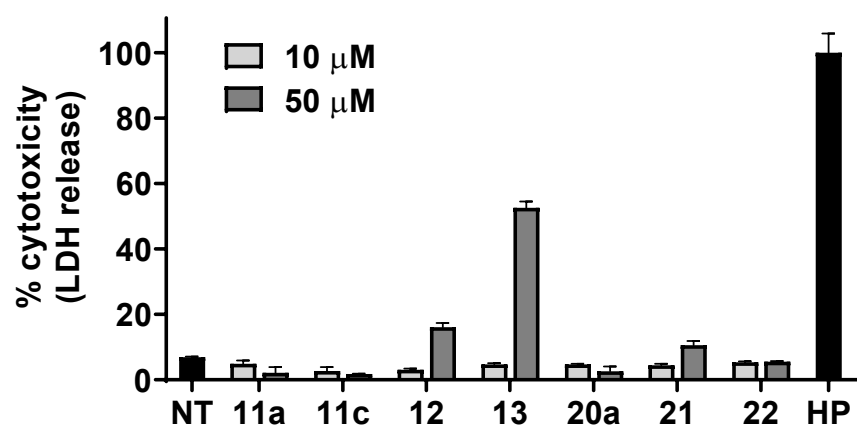

**Supplementary Figure 1.** Effects of selected xanthine derivatives on LDH release from SH-SY5Y cells. Experiments were conducted in six replicates. Results are normalized as percent of cytotoxicity induced by 300 μM hydrogen peroxide (HP) ± SEM. NT– vehicle control (1% DMSO).

**Supplementary Table 1.** Solvent, reaction time, crystal solvent and TLC properties for intermediate compounds.

| Compd | Reaction medium | Time (h) reflux | Crystal. solvent            | TLC benzene/acetone (7:3) R <sub>f</sub> |
|-------|-----------------|-----------------|-----------------------------|------------------------------------------|
| 8a    | Me-Digol        | 4               | methoxyethanol              | 0,43                                     |
| 8b    | Me-Digol        | 4               | butanol                     | 0,51                                     |
| 8c    | 1-butanol       | 13              | ethanol                     | 0,65                                     |
| 8d    | Me-Digol        | 4               | ethanol                     | 0,38                                     |
| 8e    | Me-Digol        | 4               | ethanol                     | 0,50                                     |
| 8f    | Me-Digol        | 7               | ethanol                     | 0,60                                     |
| 8g    | Me-Digol        | 10              | propanol                    | 0,63                                     |
| 8h    | Me-Digol        | 10              | ethanol + H <sub>2</sub> O  | 0,64                                     |
| 8i    | Me-Digol        | 4               | propanol + H <sub>2</sub> O | 0,69                                     |
| 8j    | Me-Digol        | 3               | ethanol                     | 0,68                                     |
| 8k    | Me-Digol        | 5               | ethanol                     | 0,65                                     |
| 8l    | Me-Digol        | 4               | ethanol                     | 0,68                                     |
| 9     | Me-Digol        | 10              | ethanol + H <sub>2</sub> O  | 0,73                                     |
| 10    | Me-Digol        | 10              | ethanol + H <sub>2</sub> O  | 0,83                                     |
| 17a   | Ref.1           |                 |                             |                                          |
| 17b   | DMF             | 10              | ethanol                     | 0.63                                     |
| 18    | Ref.1           |                 |                             |                                          |
| 19    | DMF             | 10              | ethanol + H <sub>2</sub> O  | 0.77                                     |

**General procedure for the synthesis of 1,3-dialkyl-8-3',4'-dimethoxyphenylethyl-amino-7-alkyl- (or phenylalkyl- or phenoxyethyl-) xanthines.**

A mixture of 2 mmol of appropriate 7-alkyl, 7-phenylalkyl, 7-phenoxyethyl-1,3-dialkyl-8-bromoxanthine and 4 mmol of 3',4'-dimethoxyphenylethylamine was refluxed in 10 mL of Me-Digol or 10 mL of 1-butanol (comp **8b**) for 4-13h. The products were separated by cooling (comp **8b**, **8c**, **8e**) or by adding water to the reaction mixture. The resulting solids were filtered off and recrystallised.

**8-((3,4-Dimethoxyphenethyl)amino)-1,3,7-trimethyl-3,7-dihydro-1H-purine-2,6-dione (8a)**

Yield: 99 %; mp: 218–220 °C; Anal. for C<sub>18</sub>H<sub>23</sub>N<sub>5</sub>O<sub>4</sub>: Calcd: C, 57.90; H, 6.21; N, 18.76. Found: C, 58.05; H, 6.26; N, 18.74; UPLC/MS purity 100.00 %, *t<sub>R</sub>* = 4.50, MW 373.41, [M+H]<sup>+</sup> 374.36; <sup>1</sup>H NMR (300 MHz, CHLOROFORM-*d*) δ ppm: 2.90 (t, *J* = 6.67 Hz, 2H, NHCH<sub>2</sub>CH<sub>2</sub>), 3.37 (s, 3H, N1CH<sub>3</sub>), 3.56 (d, *J* = 8.21 Hz, 6H, N3CH<sub>3</sub>, N7CH<sub>3</sub>), 3.74 (q, *J* = 6.54 Hz, 2H, NHCH<sub>2</sub>CH<sub>2</sub>), 3.87 (s, 6H, 2 OCH<sub>3</sub>), 4.32 (bs, 1H, NH), 6.71-6.75 (m, 2H, C2H, C6H, phe), 6.82 (d, *J* = 8.72 Hz, 1H, C5H, phe). <sup>13</sup>C NMR (CHLOROFORM-*d*) δ ppm: 154.17 (C4Phe), 153.08 (C6), 151.69 (C2), 149.18 (C4), 148.35 (C8), 147.89 (C3Phe), 130.93 (C1Phe), 120.74 (C2Phe), 111.93 (C5Phe), 111.39 (C6Phe), 103.07 (C5), 55.94 (C4PheOCH<sub>3</sub>), 55.91 (C3PheOCH<sub>3</sub>), 44.94 (NHCH<sub>2</sub>), 35.42 (NHCH<sub>2</sub>CH<sub>2</sub>), 29.78 (N1CH<sub>3</sub>), 29.78 (N3CH<sub>3</sub>), 27.64 (N7CH<sub>3</sub>). IR ν (cm<sup>-1</sup>): 3332 (NH), 1698 (C=O), 1660 (C=O), 1276 (aryl OCH<sub>3</sub>), 1081 (aryl OCH<sub>3</sub>); UV λ<sub>max</sub> (nm): 294.

**8-((3,4-Dimethoxyphenethyl)amino)-7-ethyl-1,3-dimethyl-3,7-dihydro-1H-purine-2,6-dione (8b)**

Yield: 90 %; mp: 211–213 °C; Anal. for C<sub>19</sub>H<sub>25</sub>N<sub>5</sub>O<sub>4</sub>: Calcd: C, 58.90; H, 6.50; N, 18.08. Found: C, 58.87; H, 6.48; N, 18.08. UPLC/MS purity 97.48 %, *t<sub>R</sub>* = 4.88, MW 387.44, [M+H]<sup>+</sup> 388.39. <sup>1</sup>H NMR (300 MHz, CHLOROFORM-*d*) δ ppm: 1.24 (t, *J* = 7.31 Hz, 3H, N7CH<sub>2</sub>CH<sub>3</sub>), 2.91 (t, *J* = 6.67 Hz, 2H, NHCH<sub>2</sub>CH<sub>2</sub>), 3.38 (s, 3H, N1CH<sub>3</sub>), 3.55 (s, 3H, N3CH<sub>3</sub>), 3.74 (q, *J* = 6.41 Hz, 2H, NHCH<sub>2</sub>CH<sub>2</sub>), 3.87 (s, 6H, 2 OCH<sub>3</sub>), 3.99 (q, *J* = 7.31 Hz, 2H, N7CH<sub>2</sub>), 4.18 (bs, 1H, NH), 6.72-6.74 (m, 2H, C2H, C6H, phe), 6.83 (d, *J* = 8.46 Hz, 1H, C5H, phe). <sup>13</sup>C NMR (CHLOROFORM-*d*) δ ppm: 153.90 (C4Phe), 152.22 (C6), 151.76 (C2), 149.19 (C4), 148.59 (C8), 147.89 (C3Phe), 131.02 (C1Phe), 120.77 (C2Phe), 111.94 (C5Phe), 111.40 (C6Phe), 102.43 (C5), 55.95 (C4PheOCH<sub>3</sub>), 55.89 (C3PheOCH<sub>3</sub>), 44.44 (NHCH<sub>2</sub>), 38.16 (N7CH<sub>2</sub>), 35.37 (NHCH<sub>2</sub>CH<sub>2</sub>), 29.75 (N1CH<sub>3</sub>), 27.65 (N3CH<sub>3</sub>), 14.68 (N7CH<sub>2</sub>CH<sub>3</sub>). IR ν (cm<sup>-1</sup>): 3344 (NH), 1694 (C=O), 1649 (C=O), 1233 (aryl OCH<sub>3</sub>), 1097 (aryl OCH<sub>3</sub>); UV λ<sub>max</sub> (nm): 294.

**8-((3,4-Dimethoxyphenethyl)amino)-1,3-dimethyl-7-propyl-3,7-dihydro-1H-purine-2,6-dione (8c)**

Yield: 86 %; mp: 191–193 °C; Anal. for C<sub>20</sub>H<sub>27</sub>N<sub>5</sub>O<sub>4</sub>: Calcd: C, 59.84; H, 6.78; N, 17.44. Found: C, 59.68; H, 6.58; N, 17.39. UPLC/MS purity 96.40 %, *t<sub>R</sub>* = 5.46, MW 401.47, [M+H]<sup>+</sup> 402.42. <sup>1</sup>H NMR (300 MHz, CHLOROFORM-*d*) δ ppm: 0.86 (t, *J* = 7.31 Hz, 3H, N7CH<sub>2</sub>CH<sub>2</sub>CH<sub>3</sub>), 1.62-1.69 (m, 2H, N7CH<sub>2</sub>CH<sub>2</sub>CH<sub>3</sub>), 2.91 (t, *J* = 6.67 Hz, 2H, NHCH<sub>2</sub>CH<sub>2</sub>), 3.37 (s, 3H, N1CH<sub>3</sub>), 3.55 (s, 3H, N3CH<sub>3</sub>), 3.74 (q, *J* = 6.28 Hz, 2H, NHCH<sub>2</sub>CH<sub>2</sub>), 3.89 (t, *J* = 6.70 Hz, 8H, N7CH<sub>2</sub>, 2 OCH<sub>3</sub>), 4.25 (bs, 1H, NH), 6.71-6.75 (m, 2H, C2H, C6H, phe), 6.82 (d, *J* = 8.46 Hz, 1H, C5H, phe). <sup>13</sup>C NMR (CHLOROFORM-*d*) δ ppm: 153.89 (C4Phe), 152.42 (C6), 151.74 (C2), 149.24 (C4), 148.31 (C8), 147.94 (C3Phe), 130.93 (C1Phe), 120.77 (C2Phe), 111.90 (C5Phe), 111.39 (C6Phe), 102.91 (C5), 55.97 (C4PheOCH<sub>3</sub>), 55.89 (C3PheOCH<sub>3</sub>), 44.78 (NHCH<sub>2</sub>), 35.33 (NHCH<sub>2</sub>CH<sub>2</sub>), 29.81 (N1CH<sub>3</sub>),

27.68 (N3CH<sub>3</sub>), 22.75 (N7CH<sub>2</sub>CH<sub>2</sub>) 10.94 (N7CH<sub>2</sub>CH<sub>2</sub>CH<sub>3</sub>). IR  $\nu$  (cm<sup>-1</sup>): 3353 (NH), 1694 (C=O), 1649 (C=O), 1261 (aryl OCH<sub>3</sub>), 1025 (aryl OCH<sub>3</sub>); UV  $\lambda_{\text{max}}$  (nm): 293.

**8-((3,4-Dimethoxyphenethyl)amino)-7-isopropyl-1,3-dimethyl-3,7-dihydro-1H-purine-2,6-dione (8d)**

Yield: 98 %; mp: 202–204 °C; Anal. for C<sub>20</sub>H<sub>27</sub>N<sub>5</sub>O<sub>4</sub>: Calcd: C, 59.84; H, 6.78; N, 17.44. Found: C, 59.93; H, 6.88; N, 17.13. UPLC/MS purity 96.40 %,  $t_R$  = 5.46, MW 401.47, [M+H]<sup>+</sup> 402.40. <sup>1</sup>H NMR (300 MHz, CHLOROFORM-*d*)  $\delta$  ppm: 1.43 (d,  $J$  = 6.92 Hz, 6H, NHCH(CH<sub>3</sub>)<sub>2</sub>), 2.90 (t,  $J$  = 6.67 Hz, NHCH<sub>2</sub>CH<sub>2</sub>), 3.37 (s, 3H, N1CH<sub>3</sub>), 3.54 (s, 3H, N3CH<sub>3</sub>), 3.73 (q,  $J$  = 5.90 Hz, 2H, NHCH<sub>2</sub>), 3.86 (s, 6H, 2xOCH<sub>3</sub>), 4.25 (bs, 1H, NH), 4.64 (bs, 1H, N7CH), 6.76 (d,  $J$  = 5.39 Hz, 2H, C2H, C6H, phe), 6.84 (d,  $J$  = 8.72 Hz, 1H, C5H, phe). <sup>13</sup>C NMR (CHLOROFORM-*d*)  $\delta$  ppm: 153.69 (C4Phe), 152.13 (C6), 151.71 (C2), 149.25 (C4), 149.01 (C8), 147.94 (C3Phe), 131.05 (C1Phe), 120.82 (C2Phe), 111.93 (C5Phe), 111.41 (C6Phe), 102.68 (C5), 55.98 (C4PheOCH<sub>3</sub>), 55.90 (C3PheOCH<sub>3</sub>), 47.13 (N7CH), 44.73 (NHCH<sub>2</sub>), 35.28 (NHCH<sub>2</sub>CH<sub>2</sub>), 29.78 (N1CH<sub>3</sub>), 27.99 (N3CH<sub>3</sub>), 21.08 (N7CH(CH<sub>3</sub>)<sub>2</sub>). IR  $\nu$  (cm<sup>-1</sup>): 3356 (NH), 1690 (C=O), 1650 (C=O), 1281 (aryl OCH<sub>3</sub>), 1067 (aryl OCH<sub>3</sub>); UV  $\lambda_{\text{max}}$  (nm): 295.

**7-Butyl-8-((3,4-dimethoxyphenethyl)amino)-1,3-dimethyl-3,7-dihydro-1H-purine-2,6-dione (8e)**

Yield: 98 %; mp: 155–157 °C; Anal. for C<sub>21</sub>H<sub>29</sub>N<sub>5</sub>O<sub>4</sub>: Calcd: C, 60.71; H, 7.04; N, 16.86. Found: C, 60.30; H, 6.94; N, 17.05. UPLC/MS purity 97.45 %,  $t_R$  = 5.80, MW 415.49, [M+H]<sup>+</sup> 416.44. <sup>1</sup>H NMR (300 MHz, DMSO-*d*<sub>6</sub>)  $\delta$  ppm: 0.82 (t,  $J$  = 7.31 Hz, 3H, N7CH<sub>2</sub>CH<sub>2</sub>CH<sub>2</sub>CH<sub>3</sub>), 1.15–1.22 (m, 2H, N7CH<sub>2</sub>CH<sub>2</sub>CH<sub>2</sub>), 1.46–1.53 (m, 2H, N7CH<sub>2</sub>CH<sub>2</sub>), 2.80 (t,  $J$  = 7.44 Hz, 2H, NHCH<sub>2</sub>CH<sub>2</sub>), 3.15 (s, 3H, N1CH<sub>3</sub>), 3.35 (s, 3H, N3CH<sub>3</sub>), 3.51 (q,  $J$  = 6.29 Hz, 2H, NHCH<sub>2</sub>), 3.70 (d,  $J$  = 7.34 Hz, 6H, 2 OCH<sub>3</sub>), 3.96 (t,  $J$  = 7.31 Hz, 2H, N7CH<sub>2</sub>), 6.70 (d,  $J$  = 7.94 Hz, 1H, C5H, phe), 6.81–6.84 (m, 2H, C2H, C6H, phe), 7.02 (t,  $J$  = 5.51 Hz, 1H, NH). <sup>13</sup>C NMR (DMSO-*d*<sub>6</sub>)  $\delta$  ppm: 153.69 (C4Phe), 153.02 (C6), 151.42 (C2), 149.08 (C4), 148.98 (C8), 147.71 (C3Phe), 132.37 (C1Phe), 121.07 (C2Phe), 113.11 (C5Phe), 112.35 (C6Phe), 101.83 (C5), 55.96 (C4PheOCH<sub>3</sub>), 55.80 (C3PheOCH<sub>3</sub>), 44.59 (N7CH<sub>2</sub>), 42.59 (NHCH<sub>2</sub>), 35.94 (NHCH<sub>2</sub>CH<sub>2</sub>), 31.63 (N1CH<sub>3</sub>), 29.66 (N3CH<sub>3</sub>), 27.62 (N7CH<sub>2</sub>CH<sub>2</sub>), 19.49 (N7CH<sub>2</sub>CH<sub>2</sub>CH<sub>2</sub>), 14.05 (N7CH<sub>2</sub>CH<sub>2</sub>CH<sub>2</sub>CH<sub>3</sub>). IR  $\nu$  (cm<sup>-1</sup>): 3331 (NH), 1696 (C=O), 1654 (C=O), 1287 (aryl OCH<sub>3</sub>), 1039 (aryl OCH<sub>3</sub>); UV  $\lambda_{\text{max}}$  (nm): 296.

**8-((3,4-Dimethoxyphenethyl)amino)-7-isobutyl-1,3-dimethyl-3,7-dihydro-1H-purine-2,6-dione (8f)**

Yield: 98 %; mp: 172–174 °C; Anal. for C<sub>21</sub>H<sub>29</sub>N<sub>5</sub>O<sub>4</sub>: Calcd: C, 60.71; H, 7.04; N, 16.86. Found: C, 60.62; H, 6.95; N, 16.94. UPLC/MS purity 97.20 %,  $t_R$  = 5.73, MW 415.49, [M+H]<sup>+</sup> 416.44. <sup>1</sup>H NMR (300 MHz, CHLOROFORM-*d*)  $\delta$  ppm: 0.85 (d,  $J$  = 6.67 Hz, 6H, N7CH<sub>2</sub>CH(CH<sub>3</sub>)<sub>2</sub>), 1.97–2.02 (m, 1H, N7CH<sub>2</sub>CH), 2.92 (t,  $J$  = 6.67 Hz, 2H, NHCH<sub>2</sub>CH<sub>2</sub>), 3.36 (s, 3H, N1CH<sub>3</sub>), 3.60 (s, 3H, N3CH<sub>3</sub>), 3.72 (d,  $J$  = 7.69 Hz, 2H, N7CH<sub>2</sub>), 3.78–3.88 (m, 8H, NHCH<sub>2</sub>, 2 OCH<sub>3</sub>), 4.40 (bs, 1H, NH), 6.72–6.76 (m, 2H, C2H, C6H, phe), 6.82 (d,  $J$  = 7.55 Hz, 1H, C5H, phe). <sup>13</sup>C NMR (CHLOROFORM-*d*)  $\delta$  ppm: 153.86 (C4Phe), 152.68 (C6), 151.74 (C2), 149.28 (C4), 148.31 (C8), 147.95 (C3Phe), 130.90 (C1Phe), 120.78 (C2Phe), 111.90 (C5Phe), 111.39 (C6Phe), 103.18 (C5), 55.98 (C4PheOCH<sub>3</sub>),

55.89 (C3PheOCH<sub>3</sub>), 50.49 (N7CH<sub>2</sub>), 44.40 (NHCH<sub>2</sub>), 35.29 (NHCH<sub>2</sub>CH<sub>2</sub>), 29.78 (N1CH<sub>3</sub>), 28.92 (N3CH<sub>3</sub>), 27.68 (N7CH<sub>2</sub>CH), 19.70 (N7CH<sub>2</sub>CH(CH<sub>3</sub>)<sub>2</sub>). IR  $\nu$  (cm<sup>-1</sup>): 3363 (NH), 1695 (C=O), 1652 (C=O), 1291 (aryl OCH<sub>3</sub>), 1050 (aryl OCH<sub>3</sub>); UV  $\lambda_{\text{max}}$  (nm): 296.

**7-(*sec*-Butyl)-8-((3,4-dimethoxyphenethyl)amino)-1,3-dimethyl-3,7-dihydro-1H-purine-2,6-dione (8g)**

Yield: 97 %; mp: 178-180 °C; Anal. for C<sub>21</sub>H<sub>29</sub>N<sub>5</sub>O<sub>4</sub>: Calcd: C, 60.71; H, 7.04; N, 16.86. Found: C, 60.75; H, 6.84; N, 16.55. UPLC/MS purity 98.43 %,  $t_R$  = 5.83, MW 415.49, [M+H]<sup>+</sup> 416.44. <sup>1</sup>H NMR (300 MHz, CHLOROFORM-*d*)  $\delta$  ppm: 0.75 (t,  $J$  = 7.44 Hz, 3H, N7CH(CH<sub>3</sub>)CH<sub>2</sub>CH<sub>3</sub>), 1.42 (d,  $J$  = 6.92 Hz, 3H, N7CH(CH<sub>3</sub>)CH<sub>2</sub>CH<sub>3</sub>), 1.69-1.90 (m, 2H, N7CH(CH<sub>3</sub>)CH<sub>2</sub>CH<sub>3</sub>), 2.90 (t,  $J$  = 6.54 Hz, 2H, NHCH<sub>2</sub>CH<sub>2</sub>), 3.37 (s, 3H, N1CH<sub>3</sub>), 3.55 (s, 3H, N3CH<sub>3</sub>), 3.74 (q,  $J$  = 6.15 Hz, NHCH<sub>2</sub>), 3.86 (s, 6H, 2 OCH<sub>3</sub>), 4.19 (bs, 1H, N7CH), 6.71-6.74 (m, 2H, C2H, C6H, phe), 6.80-6.83 (m, 1H, C5H, phe). <sup>13</sup>C NMR (CHLOROFORM-*d*)  $\delta$  ppm: 153.62 (C4Phe), 152.58 (C6), 151.69 (C2), 149.26 (C4), 148.53 (C8), 147.93 (C3Phe), 131.02 (C1Phe), 120.82 (C2Phe), 111.92 (C5Phe), 111.41 (C6Phe), 102.43 (C5), 55.98 (C4PheOCH<sub>3</sub>), 53.90 (C3PheOCH<sub>3</sub>), 53.34 (N7CH), 44.68 (NHCH<sub>2</sub>), 35.27 (NHCH<sub>2</sub>CH<sub>2</sub>), 29.81 (N1CH<sub>3</sub>), 28.10 (N3CH<sub>3</sub>), 27.99 (N7CH(CH<sub>3</sub>)), 19.46 (N7CH(CH<sub>3</sub>)CH<sub>2</sub>), 11.29 (N7CH(CH<sub>3</sub>)CH<sub>2</sub>CH<sub>3</sub>). IR  $\nu$  (cm<sup>-1</sup>): 3359 (NH), 1690 (C=O), 1652 (C=O), 1286 (aryl OCH<sub>3</sub>), 1040 (aryl OCH<sub>3</sub>); UV  $\lambda_{\text{max}}$  (nm): 293.

**8-((3,4-Dimethoxyphenethyl)amino)-1,3-dimethyl-7-pentyl-3,7-dihydro-1H-purine-2,6-dione (8h)**

Yield: 98 %; mp: 118-120 °C; Anal. for C<sub>22</sub>H<sub>31</sub>N<sub>5</sub>O<sub>4</sub>: Calcd: C, 61.52; H, 7.28; N, 16.31. Found: C, 61.48; H, 7.17; N, 16.21. UPLC/MS purity 95.49 %,  $t_R$  = 6.30, MW 429.52, [M+H]<sup>+</sup> 430.19. <sup>1</sup>H NMR (300 MHz, CHLOROFORM-*d*)  $\delta$  ppm: 0.85 (t,  $J$  = 7.05 Hz, 3H, N7CH<sub>2</sub>CH<sub>2</sub>CH<sub>2</sub>CH<sub>2</sub>CH<sub>3</sub>), 1.18-1.29 (m, 4H, N7CH<sub>2</sub>CH<sub>2</sub>CH<sub>2</sub>CH<sub>2</sub>CH<sub>2</sub>), 1.58-1.63 (m, 2H, N7CH<sub>2</sub>CH<sub>2</sub>), 2.91 (t,  $J$  = 6.67 Hz, 2H, NHCH<sub>2</sub>CH<sub>2</sub>), 3.37 (s, 3H, N1CH<sub>3</sub>), 3.55 (s, 3H, N3CH<sub>3</sub>), 3.75 (q,  $J$  = 6.41 Hz, 2H, NHCH<sub>2</sub>), 3.86-3.93 (m, 8H, N7CH<sub>2</sub>, 2 OCH<sub>3</sub>), 4.12 (bs, 1H, NH), 6.71-6.75 (m, 2H, C2H, C6H, phe), 6.82 (d,  $J$  = 8.72 Hz, 1H, C5H, phe). <sup>13</sup>C NMR (CHLOROFORM-*d*)  $\delta$  ppm: 153.89 (C4Phe), 152.38 (C6), 151.75 (C2), 149.28 (C4), 148.34 (C8), 147.94 (C3Phe), 130.89 (C1Phe), 120.76 (C2Phe), 111.85 (C5Phe), 111.33 (C6Phe), 102.84 (C5), 55.92 (C4PheOCH<sub>3</sub>), 55.89 (C3PheOCH<sub>3</sub>), 44.36 (N7CH<sub>2</sub>), 43.36 (NHCH<sub>2</sub>), 35.29 (NHCH<sub>2</sub>CH<sub>2</sub>), 29.78 (N1CH<sub>3</sub>), 29.20 (N3CH<sub>3</sub>), 28.62 (N7CH<sub>2</sub>CH<sub>2</sub>), 27.68 (N7CH<sub>2</sub>CH<sub>2</sub>CH<sub>2</sub>), 22.29 (N7CH<sub>2</sub>CH<sub>2</sub>CH<sub>2</sub>CH<sub>2</sub>), 13.88 (N7CH<sub>2</sub>CH<sub>2</sub>CH<sub>2</sub>CH<sub>2</sub>CH<sub>3</sub>). IR  $\nu$  (cm<sup>-1</sup>): 3332 (NH), 1699 (C=O), 1646 (C=O), 1289 (aryl OCH<sub>3</sub>), 1041 (aryl OCH<sub>3</sub>); UV  $\lambda_{\text{max}}$  (nm): 294.

**8-((3,4-Dimethoxyphenethyl)amino)-7-hexyl-1,3-dimethyl-3,7-dihydro-1H-purine-2,6-dione (8i)**

Yield: 98 %; mp: 112-114 °C; Anal. for C<sub>23</sub>H<sub>33</sub>N<sub>5</sub>O<sub>4</sub>: Calcd: C, 62.28; H, 7.50; N, 15.79. Found: C, 62.39; H, 7.58; N, 15.77. UPLC/MS purity 97.19 %,  $t_R$  = 6.86, MW 443.55, [M+H]<sup>+</sup> 444.21. <sup>1</sup>H NMR (300 MHz, CHLOROFORM-*d*)  $\delta$  ppm: 0.85 (t,  $J$  = 6.67 Hz, 3H, N7CH<sub>2</sub>CH<sub>2</sub>CH<sub>2</sub>CH<sub>2</sub>CH<sub>2</sub>CH<sub>3</sub>), 1.24 (s, 6H, N7CH<sub>2</sub>CH<sub>2</sub>CH<sub>2</sub>CH<sub>2</sub>CH<sub>2</sub>CH<sub>2</sub>), 1.60 (s, 2H, N7CH<sub>2</sub>CH<sub>2</sub>), 2.91 (t,  $J$  = 6.54 Hz, 2H, NHCH<sub>2</sub>CH<sub>2</sub>), 3.37 (s, 3H, N1CH<sub>3</sub>), 3.56 (s, 3H, N3CH<sub>3</sub>), 3.76 (t,  $J$  = 6.03 Hz, 2H, NHCH<sub>2</sub>), 3.86-3.93 (m, 8H, N7CH<sub>2</sub>, 2 OCH<sub>3</sub>), 4.23 (bs, 1H, NH), 6.71-6.74 (m, 2H, C2H, C6H, phe), 6.82 (d,  $J$  = 8.72 Hz, 1H, C5H, phe). <sup>13</sup>C NMR (CHLOROFORM-*d*)  $\delta$  ppm: 153.89 (C4Phe),

152.27 (C6), 151.73 (C2), 149.28 (C4), 147.95 (C8/C3Phe), 130.86 (C1Phe), 120.75 (C2Phe), 111.86 (C5Phe), 111.32 (C6Phe), 102.83 (C5), 55.91 (C4PheOCH<sub>3</sub>), 55.90 (C3PheOCH<sub>3</sub>), 44.40 (N7CH<sub>2</sub>), 43.44 (NHCH<sub>2</sub>), 35.31 (NHCH<sub>2</sub>CH<sub>2</sub>), 31.35 (N7CH<sub>2</sub>CH<sub>2</sub>CH<sub>2</sub>), 29.85 (N1CH<sub>3</sub>), 29.47 (N3CH<sub>3</sub>), 27.70 (N7CH<sub>2</sub>CH<sub>2</sub>), 26.24 (N7CH<sub>2</sub>CH<sub>2</sub>CH<sub>2</sub>CH<sub>2</sub>), 22.49 (N7CH<sub>2</sub>CH<sub>2</sub>CH<sub>2</sub>CH<sub>2</sub>CH<sub>2</sub>), 13.96 (N7CH<sub>2</sub>CH<sub>2</sub>CH<sub>2</sub>CH<sub>2</sub>CH<sub>2</sub>CH<sub>2</sub>). IR  $\nu$  (cm<sup>-1</sup>): 3337 (NH), 1701 (C=O), 1658 (C=O), 1281 (aryl OCH<sub>3</sub>), 1040 (aryl OCH<sub>3</sub>); UV  $\lambda_{\text{max}}$  (nm): 297

**7-Benzyl-8-((3,4-dimethoxyphenethyl)amino)-1,3-dimethyl-3,7-dihydro-1H-purine-2,6-dione (8j)**

Yield: 75 %; mp: 167-170 °C; Anal. for C<sub>24</sub>H<sub>27</sub>N<sub>5</sub>O<sub>4</sub>: Calcd: C, 64.13; H, 6.06; N, 15.58. Found: C, 64.09; H, 6.06; N, 15.68. UPLC/MS purity 98.84 %,  $t_R$  = 5.95, MW 449.51, [M+H]<sup>+</sup> 450.31; <sup>1</sup>H NMR (300 MHz, CHLOROFORM-*d*)  $\delta$  ppm: 2.79 (t,  $J$  = 6.54 Hz, 2H, NHCH<sub>2</sub>CH<sub>2</sub>), 3.38 (s, 3H, N1CH<sub>3</sub>), 3.57 (s, 3H, N3CH<sub>3</sub>), 3.67 (q,  $J$  = 6.16 Hz, 2H, NHCH<sub>2</sub>), 3.81 (s, 3H, 4'OCH<sub>3</sub>), 3.87 (s, 3H, 3'OCH<sub>3</sub>), 4.13-4.15 (m, 1H, NH), 5.22 (s, 2H, N7CH<sub>2</sub>), 6.57 (d,  $J$  = 7.95 Hz, 1H, C5H, phe), 6.63 (s, 1H, C2H, phe), 6.73 (d,  $J$  = 7.95 Hz, 1H, C6H, phe), 7.05-7.08 (m, 2H, C2H, C6H, benzyl), 7.24-7.28 (m, 3H, C3H, C4H, C5H, benzyl); <sup>13</sup>C NMR (CHLOROFORM-*d*)  $\delta$  ppm: 154.2 (C4Phe), 153.1 (C6), 151.7 (C2), 149.2 (C4), 148.5 (C8), 147.9 (C3Phe), 135.1 (C1benzyl), 130.6 (C1Phe), 129.1 (C3/C5benzyl), 128.1 (C4benzyl), 127.0 (C2/6benzyl), 120.6 (C2Phe), 111.7 (C5Phe), 111.3 (C6Phe), 102.9 (C5), 55.90 (C4PheOCH<sub>3</sub>), 55.8 (C3PheOCH<sub>3</sub>), 46.6 (N7CH<sub>2</sub>), 44.1 (NHCH<sub>2</sub>), 35.1 (NHCH<sub>2</sub>CH<sub>2</sub>), 29.8 (N1CH<sub>3</sub>), 27.7 (N3CH<sub>3</sub>); IR  $\nu$  (cm<sup>-1</sup>): 3331 (NH), 1696 (C=O), 1654 (C=O), 1289 (aryl OCH<sub>3</sub>), 1039 (aryl OCH<sub>3</sub>); UV  $\lambda_{\text{max}}$  (nm): 297

**8-((3,4-Dimethoxyphenethyl)amino)-1,3-dimethyl-7-phenethyl-3,7-dihydro-1H-purine-2,6-dione (8k)**

Yield: 95 %; mp: 168-171 °C; Anal. for C<sub>25</sub>H<sub>29</sub>N<sub>5</sub>O<sub>4</sub>: Calcd: C, 64.79; H, 6.31; N, 15.11. Found: C, 64.69; H, 6.21; N, 15.13. UPLC/MS purity 96.23 %,  $t_R$  = 5.95, MW 463.52, [M+H]<sup>+</sup> 464.15; <sup>1</sup>H NMR (300 MHz, CHLOROFORM-*d*)  $\delta$  ppm: 2.61 (t,  $J$  = 6.92 Hz, 2H, NHCH<sub>2</sub>CH<sub>2</sub>), 3.00 (t,  $J$  = 6.67 Hz, 2H, NHCH<sub>2</sub>), 3.37-3.42 (m, 5H, N1CH<sub>3</sub>, N7CH<sub>2</sub>CH<sub>2</sub>), 3.44 (bs, 1H, NH), 3.55 (s, 3H, N3CH<sub>3</sub>), 3.87 (s, 6H, 2 OCH<sub>3</sub>), 4.14 (t,  $J$  = 6.54 Hz, 2H, N7CH<sub>2</sub>), 6.65-6.68 (m, 2H, C2H, C6H, phe), 6.81 (d,  $J$  = 8.46 Hz, 1H, C5H, phe), 7.03-7.06 (m, 2H, C2H, C6H, phe-ethyl), 7.22-7.33 (m, 3H, C3H, C4H, C5H, phe-ethyl); <sup>13</sup>C NMR (CHLOROFORM-*d*)  $\delta$  ppm: 154.0 (C4Phe), 153.0 (C6), 151.8 (C2), 149.2 (C4), 148.6 (C8), 147.9 (C3Phe), 138.3 (C1, phe-ethyl), 131.0 (C1Phe), 129.0 (C3/C5, phe-ethyl), 128.8 (C4, phe-ethyl), 127.0 (C2/6, phe-ethyl), 120.7 (C2Phe), 111.9 (C5Phe), 111.3 (C6Phe), 102.6 (C5), 56.0 (C4PheOCH<sub>3</sub>), 55.9 (C3PheOCH<sub>3</sub>), 45.7 (N7CH<sub>2</sub>), 44.5 (N7CH<sub>2</sub>CH<sub>2</sub>), 36.5 (NHCH<sub>2</sub>), 35.3 (NHCH<sub>2</sub>CH<sub>2</sub>), 29.8 (N1CH<sub>3</sub>), 27.7 (N3CH<sub>3</sub>); IR  $\nu$  (cm<sup>-1</sup>): 3379 (NH), 1690 (C=O), 1647 (C=O), 1258 (aryl OCH<sub>3</sub>), 1027 (aryl OCH<sub>3</sub>); UV  $\lambda_{\text{max}}$  (nm): 296.

**8-((3,4-Dimethoxyphenethyl)amino)-1,3-dimethyl-7-(2-phenoxyethyl)-3,7-dihydro-1H-purine-2,6-dione (8l)**

Yield: 88 %; mp: 142-145 °C; Anal. for C<sub>25</sub>H<sub>29</sub>N<sub>5</sub>O<sub>5</sub>: Calcd: C, 62.62; H, 6.10; N, 14.60. Found: C, 62.63; H, 6.34; N, 14.51. UPLC/MS purity 96.48 %,  $t_R$  = 6.25, MW 479.52, [M+H]<sup>+</sup> 480.17; <sup>1</sup>H NMR (300 MHz, CHLOROFORM-*d*)  $\delta$  ppm: 2.95 (t,  $J$  = 6.80 Hz, 2H, NHCH<sub>2</sub>CH<sub>2</sub>), 3.37 (s, 3H, N1CH<sub>3</sub>), 3.57 (s, 3H, N3CH<sub>3</sub>), 3.71-3.81 (m, 5H, 3'OCH<sub>3</sub>, NHCH<sub>2</sub>CH<sub>2</sub>), 3.86 (s, 3H, 4'OCH<sub>3</sub>), 4.27 (t,  $J$  = 4.41 Hz, 2H, N7CH<sub>2</sub>CH<sub>2</sub>O), 4.42 (t,  $J$  = 4.36 Hz, 2H, N7CH<sub>2</sub>CH<sub>2</sub>O), 5.40 (bs, 1H, NH), 6.54-6.58 (m, 2H, C2H, C6H, phe), 6.75-6.82 (m, 3H, C3H, C4H, C5H, phenoxy), 6.93-6.99 (m, 1H, C5H, phe), 7.19-7.26 (m, 2H, C2H, C6H, phenoxy); <sup>13</sup>C NMR (CHLOROFORM-*d*)  $\delta$  ppm: 157.4 (C1,

phenoxy), 154.5 (C4Phe), 154.2 (C6), 151.7 (C2), 149.3 (C4), 148.5 (C8), 147.9 (C3Phe), 131.1 (C1Phe), 129.6 (C3/C5, phenoxy), 121.9 (C2Phe), 120.7 (C5Phe), 114.3 (C2/6, phenoxy), 111.9 (C6Phe), 111.4 (C4, phenoxy), 102.7 (C5), 68.5 (N7CH<sub>2</sub>CH<sub>2</sub>O), 55.9 (C4PheOCH<sub>3</sub>), 55.9 (C3PheOCH<sub>3</sub>), 44.7 (N7CH<sub>2</sub>), 43.9 (NHCH<sub>2</sub>), 35.6 (NHCH<sub>2</sub>CH<sub>2</sub>), 29.9 (N1CH<sub>2</sub>), 27.7 (N3CH<sub>2</sub>); IR  $\nu$  (cm<sup>-1</sup>): 3395(NH), 1696 (C=O), 1654 (C=O), 1292 (aryl OCH<sub>3</sub>), 1038 (aryl OCH<sub>3</sub>); UV  $\lambda_{\text{max}}$  (nm): 296.

**8-((3,4-Dimethoxyphenethyl)amino)-1,3,7-tripropyl-3,7-dihydro-1H-purine-2,6-dione (9)**

Yield: 79 %; mp: 75-78 °C. UPLC/MS purity 98.61 %,  $t_R$  = 7.45, MW 457.58, [M+H]<sup>+</sup> 458.24; <sup>1</sup>H NMR (300 MHz, CHLOROFORM-*d*)  $\delta$  ppm: 0.85-1.00 (m, 9H, 3 CH<sub>2</sub>CH<sub>2</sub>CH<sub>3</sub>) 1.62-1.83 (m, 6H, 3 CH<sub>2</sub>CH<sub>2</sub>CH<sub>3</sub>), 2.90 (t,  $J$  = 6.67 Hz, 2H, NHCH<sub>2</sub>CH<sub>2</sub>), 3.73 (q,  $J$  = 5.77 Hz, 2H, NHCH<sub>2</sub>) 3.86-3.95 (m, 10H, N1CH<sub>2</sub>, N3CH<sub>2</sub>, 2 OCH<sub>3</sub>), 4.04 (t,  $J$  = 7.19 Hz, N7CH<sub>2</sub>), 4.25 (bs, 1H, NH), 6.71-6.75 (m, 2H, C2H, C6H, phe), 6.82 (d,  $J$  = 8.46 Hz, 1H, C5H, phe). <sup>13</sup>C NMR (CHLOROFORM-*d*)  $\delta$  ppm: 153.9 (C4Phe), 152.3 (C6), 151.2 (C2), 149.2 (C8), 147.9 (C3Phe), 131.1 (C1Phe), 120.8 (C2Phe), 112.0 (C5Phe), 111.4 (C6Phe), 103.0 (C5), 56.0 (C4PheOCH<sub>3</sub>), 55.9 (C3PheOCH<sub>3</sub>), 44.8 (N7CH<sub>2</sub>), 44.6 (N1CH<sub>2</sub>), 42.6 (NHCH<sub>2</sub>), 35.4 (NHCH<sub>2</sub>CH<sub>2</sub>), 22.9 (N7CH<sub>2</sub>CH<sub>2</sub>), 21.4 (N3CH<sub>2</sub>CH<sub>2</sub>/N1CH<sub>2</sub>CH<sub>2</sub>), 11.4 (N3CH<sub>2</sub>CH<sub>2</sub>CH<sub>3</sub>), 11.3 (N1CH<sub>2</sub>CH<sub>2</sub>CH<sub>3</sub>), 11.0 (N7CH<sub>2</sub>CH<sub>2</sub>CH<sub>3</sub>). IR  $\nu$  (cm<sup>-1</sup>): 3351 (NH), 1697 (C=O), 1639 (C=O), 1262 (aryl OCH<sub>3</sub>), 1028 (aryl OCH<sub>3</sub>); UV  $\lambda_{\text{max}}$  (nm): 297

**1,3-dibutyl-8-((3,4-dimethoxyphenethyl)amino)-7-propyl-3,7-dihydro-1H-purine-2,6-dione (10)**

Yield: 99 %; mp: 102-105 °C. UPLC/MS purity 96.60 %,  $t_R$  = 8.56, MW 485.61, [M+H]<sup>+</sup> 486.51; <sup>1</sup>H NMR (300 MHz, CHLOROFORM-*d*)  $\delta$  ppm: 0.85-1.00 (m, 9H, CH<sub>2</sub>CH<sub>2</sub>CH<sub>3</sub> + 2 x CH<sub>2</sub>CH<sub>2</sub>CH<sub>2</sub>CH<sub>3</sub>), 1.31-1.46 (m, 4H, 2x CH<sub>2</sub>CH<sub>2</sub>CH<sub>2</sub>CH<sub>3</sub>) 1.56-1.79 (m, 6H, 3 CH<sub>2</sub>CH<sub>2</sub>CH<sub>3</sub>, 2 x CH<sub>2</sub>CH<sub>2</sub>CH<sub>2</sub>CH<sub>3</sub>), 2.90 (t,  $J$  = 6.67 Hz, 2H, NHCH<sub>2</sub>CH<sub>2</sub>), 3.72 (q,  $J$  = 6.41 Hz, 2H, NHCH<sub>2</sub>) 3.83-3.90 (m, 8H, N7CH<sub>2</sub>, 2 OCH<sub>3</sub>), 3.96 (t,  $J$  = 7.56 Hz, N3CH<sub>2</sub>), 4.07 (t,  $J$  = 7.43 Hz, N1CH<sub>2</sub>), 4.25 (bs, 1H, NH), 6.71-6.75 (m, 2H, C2H, C6H, phe), 6.82 (d,  $J$  = 8.69 Hz, 1H, C5H, phe). <sup>13</sup>C NMR (CHLOROFORM-*d*)  $\delta$  ppm: 153.9 (C4Phe), 152.4 (C6), 151.2 (C2), 149.2 (C8), 148.2 (C4), 147.9 (C3Phe), 131.1 (C1Phe), 120.8 (C2Phe), 111.9 (C5Phe), 111.4 (C6Phe), 103.0 (C5), 56.0 (C4PheOCH<sub>3</sub>), 55.9 (C3PheOCH<sub>3</sub>), 44.8 (N7CH<sub>2</sub>), 44.5 (N1CH<sub>2</sub>), 43.05 (NHCH<sub>2</sub>), 40.9 (N3CH<sub>2</sub>), 35.2 (NHCH<sub>2</sub>CH<sub>2</sub>), 30.3 (N1CH<sub>2</sub>CH<sub>2</sub>), 30.2 (N3CH<sub>2</sub>CH<sub>2</sub>), 22.9 (N7CH<sub>2</sub>CH<sub>2</sub>), 20.3 (N1CH<sub>2</sub>CH<sub>2</sub>CH<sub>2</sub>), 20.0 (N3CH<sub>2</sub>CH<sub>2</sub>CH<sub>2</sub>), 13.9 (N3CH<sub>2</sub>CH<sub>2</sub>CH<sub>2</sub>CH<sub>3</sub>), 13.8 (N1CH<sub>2</sub>CH<sub>2</sub>CH<sub>2</sub>CH<sub>3</sub>), 11.0 (N7CH<sub>2</sub>CH<sub>2</sub>CH<sub>3</sub>). IR  $\nu$  (cm<sup>-1</sup>): 3356 (NH), 1699 (C=O), 1645 (C=O), 1262 (aryl OCH<sub>3</sub>), 1026 (aryl OCH<sub>3</sub>); UV  $\lambda_{\text{max}}$  (nm): 297

**General procedure for the synthesis of N-9,10-3',4'-dimethoxyphenylethyl-1,3-dialkyl-6,7,8,9-tetrahydropyrimido- (or 7,8,9,10-tetrahydro-1H-[1,3]diazepino-) [2,1-*f*]purine-2,4(1H,3H)diones.**

A mixture of 4 mmol of 1,3-dialkyl 7-Cl(Br) propyl, butyl-8-bromoxanthines and 8 mmol of 3,4-dimethoxyphenylethylamine was refluxed in 10 mL of DMF for 10-12h. After cooling water was added and precipitated products were filtered off, dried and recrystallised from ethanol or ethanol and water.

**9-(3,4-Dimethoxyphenethyl)-1,3-dimethyl-6,7,8,9-tetrahydropyrimido[2,1-f]purine-2,4(1H,3H)-dione (17a)**

The synthesis and physicochemical properties of the compound were reported previously.[1]

**10-(3,4-Dimethoxyphenethyl)-1,3-dimethyl-7,8,9,10-tetrahydro-1H-[1,3]diazepino[2,1-f]purine-2,4(3H,6H)-dione (17b)**

Yield: 98 %; mp: 132–134 °C; <sup>1</sup>H NMR (300 MHz, CHLOROFORM-*d*) δ ppm: 1.78–1.86 (m, 4H, CH<sub>2</sub>CH<sub>2</sub>CH<sub>2</sub>CH<sub>2</sub>); 2.92 (t, *J* = 7.44 Hz, 2H, N10CH<sub>2</sub>CH<sub>2</sub>); 3.25 (t, *J* = 5.00 Hz, 2H, N10CH<sub>2</sub>CH<sub>2</sub>); 3.37 (s, 3H, N3CH<sub>3</sub>); 3.55 (s, 3H, N1CH<sub>3</sub>); 3.75 (t, *J* = 7.44 Hz, 2H, CH<sub>2</sub>CH<sub>2</sub>CH<sub>2</sub>CH<sub>2</sub>); 3.86 (d, *J* = 2.05 Hz, 6H, 2 OCH<sub>3</sub>); 4.15 (t, *J* = 5.13 Hz, 2H, CH<sub>2</sub>CH<sub>2</sub>CH<sub>2</sub>CH<sub>2</sub>); 6.73–6.81 (m, 3H, C2H, C5H, C6H, phe); <sup>13</sup>C NMR (CHLOROFORM-*d*) δ ppm: 158.7 (C4Phe); 154.4 (C4); 151.8 (C2); 148.9 (C9a); 148.0; (C10a); 147.6 (C3Phe); 131.8 (C1Phe); 120.8 (C2Phe); 112.0 (C5Phe); 111.3 (C6Phe); 55.9 (C4PheOCH<sub>3</sub>); 55.9 (C3PheOCH<sub>3</sub>); 55.2 (C9); 52.3 (C8); 45.8 (N10CH<sub>2</sub>); 33.9 (N10CH<sub>2</sub>CH<sub>2</sub>); 29.7 (C6); 29.0 (N3CH<sub>3</sub>); 27.7 (N1CH<sub>3</sub>); 26.4 (C7); IR ν (cm<sup>-1</sup>): 1690 (C=O), 1656 (C=O), 1277 (aryl OCH<sub>3</sub>), 1072 (aryl OCH<sub>3</sub>); UV λ<sub>max</sub> (nm): 299; UPLC/MS purity 98.50 %, *t*<sub>R</sub> = 5.76, C<sub>21</sub>H<sub>27</sub>N<sub>5</sub>O<sub>4</sub>, MW 413.48, [M+H]<sup>+</sup> 414.10. Anal. for C<sub>21</sub>H<sub>27</sub>N<sub>5</sub>O<sub>4</sub>: Calcd: C, 61.00; H, 6.58; N, 16.94. Found: C, 60.85; H, 6.91; N, 16.91.

**9-(3,4-Dimethoxyphenethyl)-1,3-dipropyl-6,7,8,9-tetrahydropyrimido[2,1-f]purine-2,4(1H,3H)-dione (18)**

The synthesis and physicochemical properties of the compound were reported previously.[1]

**1,3-Dibutyl-9-(3,4-dimethoxyphenethyl)-6,7,8,9-tetrahydropyrimido[2,1-f]purine-2,4(1H,3H)-dione (19)**

Yield: 67 %; mp: 82–85 °C; <sup>1</sup>H NMR (300 MHz, CHLOROFORM-*d*) δ ppm: 0.84–0.93 (m, 6H, 2 x CH<sub>2</sub>CH<sub>2</sub>CH<sub>2</sub>CH<sub>3</sub>); 1.25–1.40 (m, 4H, 2 x CH<sub>2</sub>CH<sub>2</sub>CH<sub>2</sub>CH<sub>3</sub>); 1.51–1.73 (m, 4H, 2 x CH<sub>2</sub>CH<sub>2</sub>CH<sub>2</sub>CH<sub>3</sub>); 1.93–2.02 (m, 2H, CH<sub>2</sub>CH<sub>2</sub>CH<sub>2</sub>); 2.82 (t, *J* = 7.29 Hz, 2H, CH<sub>2</sub>CH<sub>2</sub>); 3.15 (t, *J* = 5.64 Hz, 2H, CH<sub>2</sub>CH<sub>2</sub>); 3.64 (t, *J* = 7.33 Hz, 2H, CH<sub>2</sub>CH<sub>2</sub>CH<sub>2</sub>); 3.79 (s, 6H, 2 x OCH<sub>3</sub>); 3.89 (t, *J* = 7.54 Hz, 2H, N3CH<sub>2</sub>); 3.98 (t, *J* = 7.27 Hz, 2H, N1CH<sub>2</sub>); 4.11 (t, *J* = 6.00 Hz, 2H, CH<sub>2</sub>CH<sub>2</sub>CH<sub>2</sub>); 6.66–6.75 (m, 3H, C2H, C5H, C6H, phe); <sup>13</sup>C NMR (CHLOROFORM-*d*) δ ppm: 153.8 (C4Phe); 151.4 (C4); 151.3 (C2); 149.0 (C9a); 148.90 (C10a); 147.7 (C3Phe); 131.5 (C1Phe); 120.8 (C2Phe); 112.0 (C5Phe); 111.3 (C6Phe); 102.9 (C4a); 55.2 (C4PheOCH<sub>3</sub>); 55.8 (C3PheOCH<sub>3</sub>); 51.7 (C8); 45.4 (N9CH<sub>2</sub>); 42.9 (N1CH<sub>2</sub>); 41.5 (N3CH<sub>2</sub>); 40.8 (C6); 33.5 (N9CH<sub>2</sub>CH<sub>2</sub>); 30.4 (N1CH<sub>2</sub>CH<sub>2</sub>); 30.2 (N3CH<sub>2</sub>CH<sub>2</sub>); 21.5 (C7); 20.3 (N1CH<sub>2</sub>CH<sub>2</sub>CH<sub>2</sub>); 20.1 (N3CH<sub>2</sub>CH<sub>2</sub>CH<sub>2</sub>); 13.9 (N3CH<sub>2</sub>CH<sub>2</sub>CH<sub>2</sub>CH<sub>3</sub>); 13.8 (N1CH<sub>2</sub>CH<sub>2</sub>CH<sub>2</sub>CH<sub>3</sub>); IR ν (cm<sup>-1</sup>): 1687 (CO), 1655 (CO), 1234 (aryl OCH<sub>3</sub>), 1070 (aryl OCH<sub>3</sub>); UV λ<sub>max</sub> (nm): 302; UPLC/MS purity 97.27 %, *t*<sub>R</sub> = 8.16, C<sub>26</sub>H<sub>37</sub>N<sub>5</sub>O<sub>4</sub>, MW 483.60, [M+H]<sup>+</sup> 484.22. Anal. for C<sub>26</sub>H<sub>37</sub>N<sub>5</sub>O<sub>4</sub>: Calcd: C, 64.58; H, 7.72; N, 14.48. Found: C, 64.98; H, 7.71; N, 14.39.

## References

1. Drabczyńska, A.; Müller, C.E.; Schiedel, A.; Schumacher, B.; Karolak-Wojciechowska, J.; Fruziński, A.; Zobnina, W.; Yuzlenko, O.; Kieć-Kononowicz, K. Phenylethyl-Substituted Pyrimido[2,1-f]Purinediones and Related Compounds: Structure–Activity Relationships as Adenosine A1 and A2A Receptor Ligands. *Bioorg. Med. Chem.* **2007**, *15*, 6956–6974, doi:10.1016/j.bmc.2007.07.051.

**$^1\text{H}$  and  $^{13}\text{C}$  spectra for intermediates and final compounds**

**Compound 11a**  
**<sup>1</sup>H NMR**

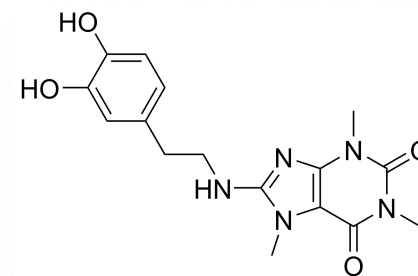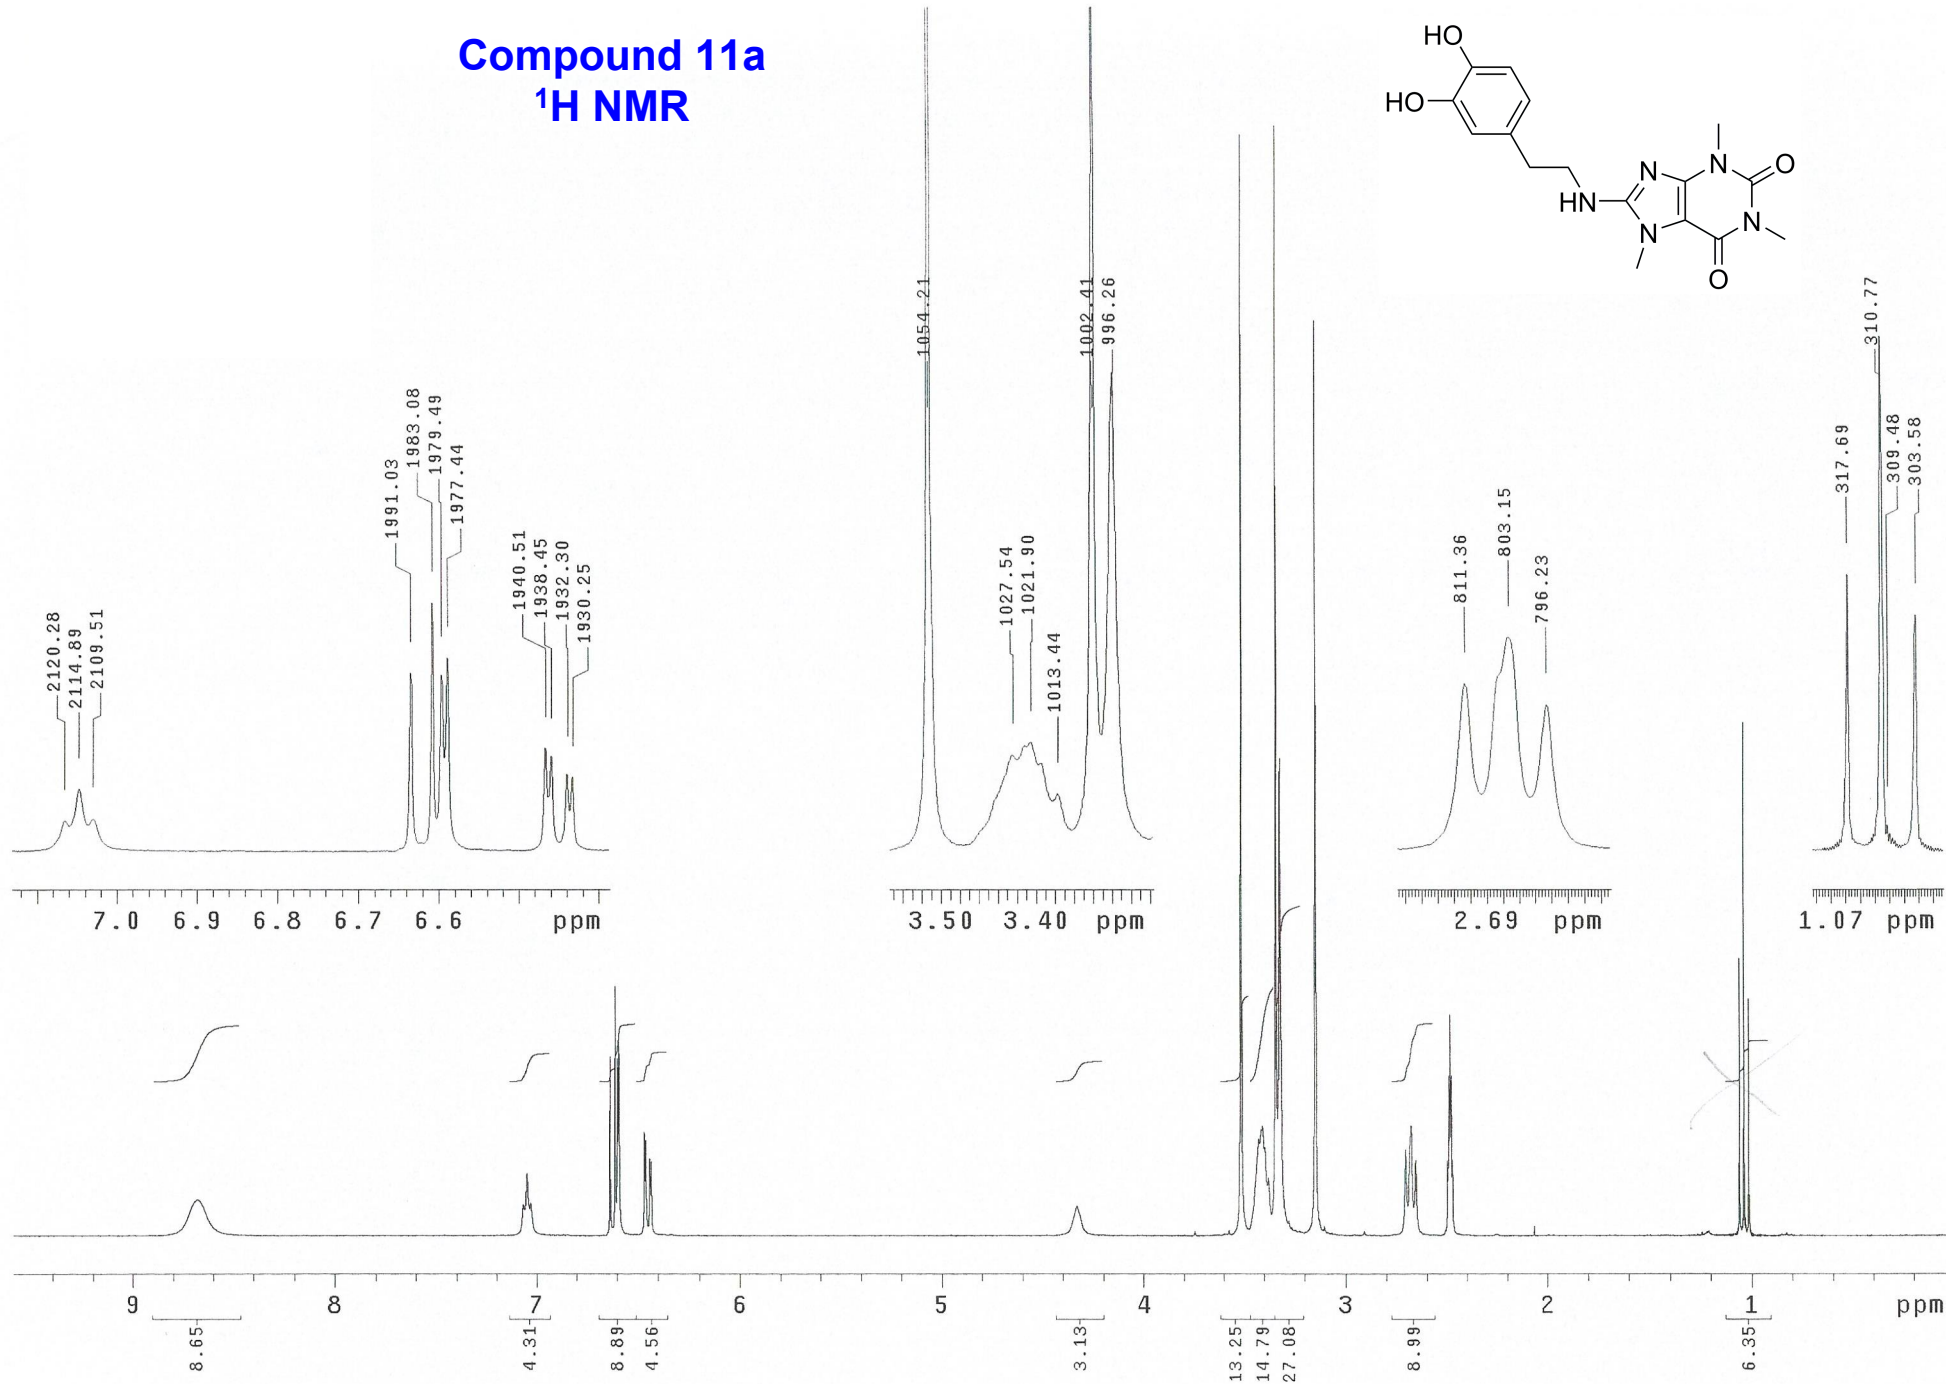

## Table of peaks

| INDEX | FREQUENCY | PPM   | HEIGHT |
|-------|-----------|-------|--------|
| 1     | 2603.943  | 8.677 | 4.7    |
| 2     | 2120.278  | 7.066 | 4.0    |
| 3     | 2114.892  | 7.048 | 8.1    |
| 4     | 2109.507  | 7.030 | 4.3    |
| 5     | 1991.027  | 6.635 | 23.2   |
| 6     | 1983.077  | 6.608 | 32.3   |
| 7     | 1979.487  | 6.597 | 22.9   |
| 8     | 1977.435  | 6.590 | 25.1   |
| 9     | 1940.506  | 6.467 | 13.5   |
| 10    | 1938.455  | 6.460 | 12.4   |
| 11    | 1932.300  | 6.439 | 10.0   |
| 12    | 1930.248  | 6.432 | 9.7    |
| 13    | 1300.150  | 4.333 | 3.8    |
| 14    | 1054.214  | 3.513 | 142.8  |
| 15    | 1027.543  | 3.424 | 12.6   |
| 16    | 1023.953  | 3.412 | 13.8   |
| 17    | 1021.902  | 3.405 | 14.2   |
| 18    | 1018.568  | 3.394 | 11.5   |
| 19    | 1013.439  | 3.377 | 7.5    |
| 20    | 1002.411  | 3.340 | 144.0  |
| 21    | 996.257   | 3.320 | 62.1   |
| 22    | 943.941   | 3.146 | 118.7  |
| 23    | 811.356   | 2.704 | 11.2   |
| 24    | 803.150   | 2.676 | 14.3   |
| 25    | 796.225   | 2.653 | 9.8    |
| 26    | 748.526   | 2.494 | 9.7    |
| 27    | 746.730   | 2.488 | 20.8   |
| 28    | 744.935   | 2.482 | 28.7   |
| 29    | 742.884   | 2.476 | 20.7   |
| 30    | 741.089   | 2.470 | 9.8    |
| 31    | 317.689   | 1.059 | 36.0   |
| 32    | 310.765   | 1.036 | 66.7   |
| 33    | 309.483   | 1.031 | 3.4    |
| 34    | 303.584   | 1.012 | 30.7   |

# Compound 11a

## <sup>13</sup>C NMR

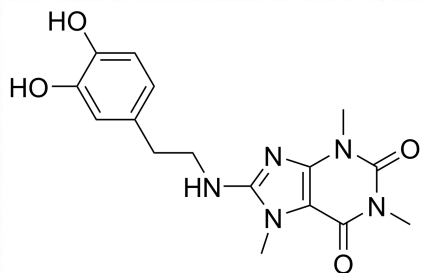

| No. | (ppm)  | (Hz)    | Height |
|-----|--------|---------|--------|
| 1   | 27.60  | 2777.1  | 0.1238 |
| 2   | 29.68  | 2986.9  | 0.1599 |
| 3   | 30.13  | 3032.4  | 0.1594 |
| 4   | 35.25  | 3547.4  | 0.0990 |
| 5   | 39.35  | 3959.7  | 0.1340 |
| 6   | 39.56  | 3980.9  | 0.4267 |
| 7   | 39.77  | 4002.2  | 0.8393 |
| 8   | 39.97  | 4022.8  | 1.0000 |
| 9   | 40.19  | 4044.0  | 0.8563 |
| 10  | 40.39  | 4064.6  | 0.4174 |
| 11  | 40.60  | 4085.8  | 0.1362 |
| 12  | 44.96  | 4524.5  | 0.1037 |
| 13  | 102.26 | 10290.6 | 0.0806 |
| 14  | 115.96 | 11669.8 | 0.1300 |
| 15  | 116.52 | 11725.5 | 0.1335 |
| 16  | 119.75 | 12051.2 | 0.1287 |
| 17  | 130.56 | 13138.4 | 0.1040 |
| 18  | 144.01 | 14491.9 | 0.1082 |
| 19  | 145.52 | 14644.5 | 0.1294 |
| 20  | 148.83 | 14977.5 | 0.0658 |
| 21  | 151.41 | 15236.5 | 0.0783 |
| 22  | 153.30 | 15427.2 | 0.0756 |
| 23  | 154.40 | 15537.3 | 0.0949 |

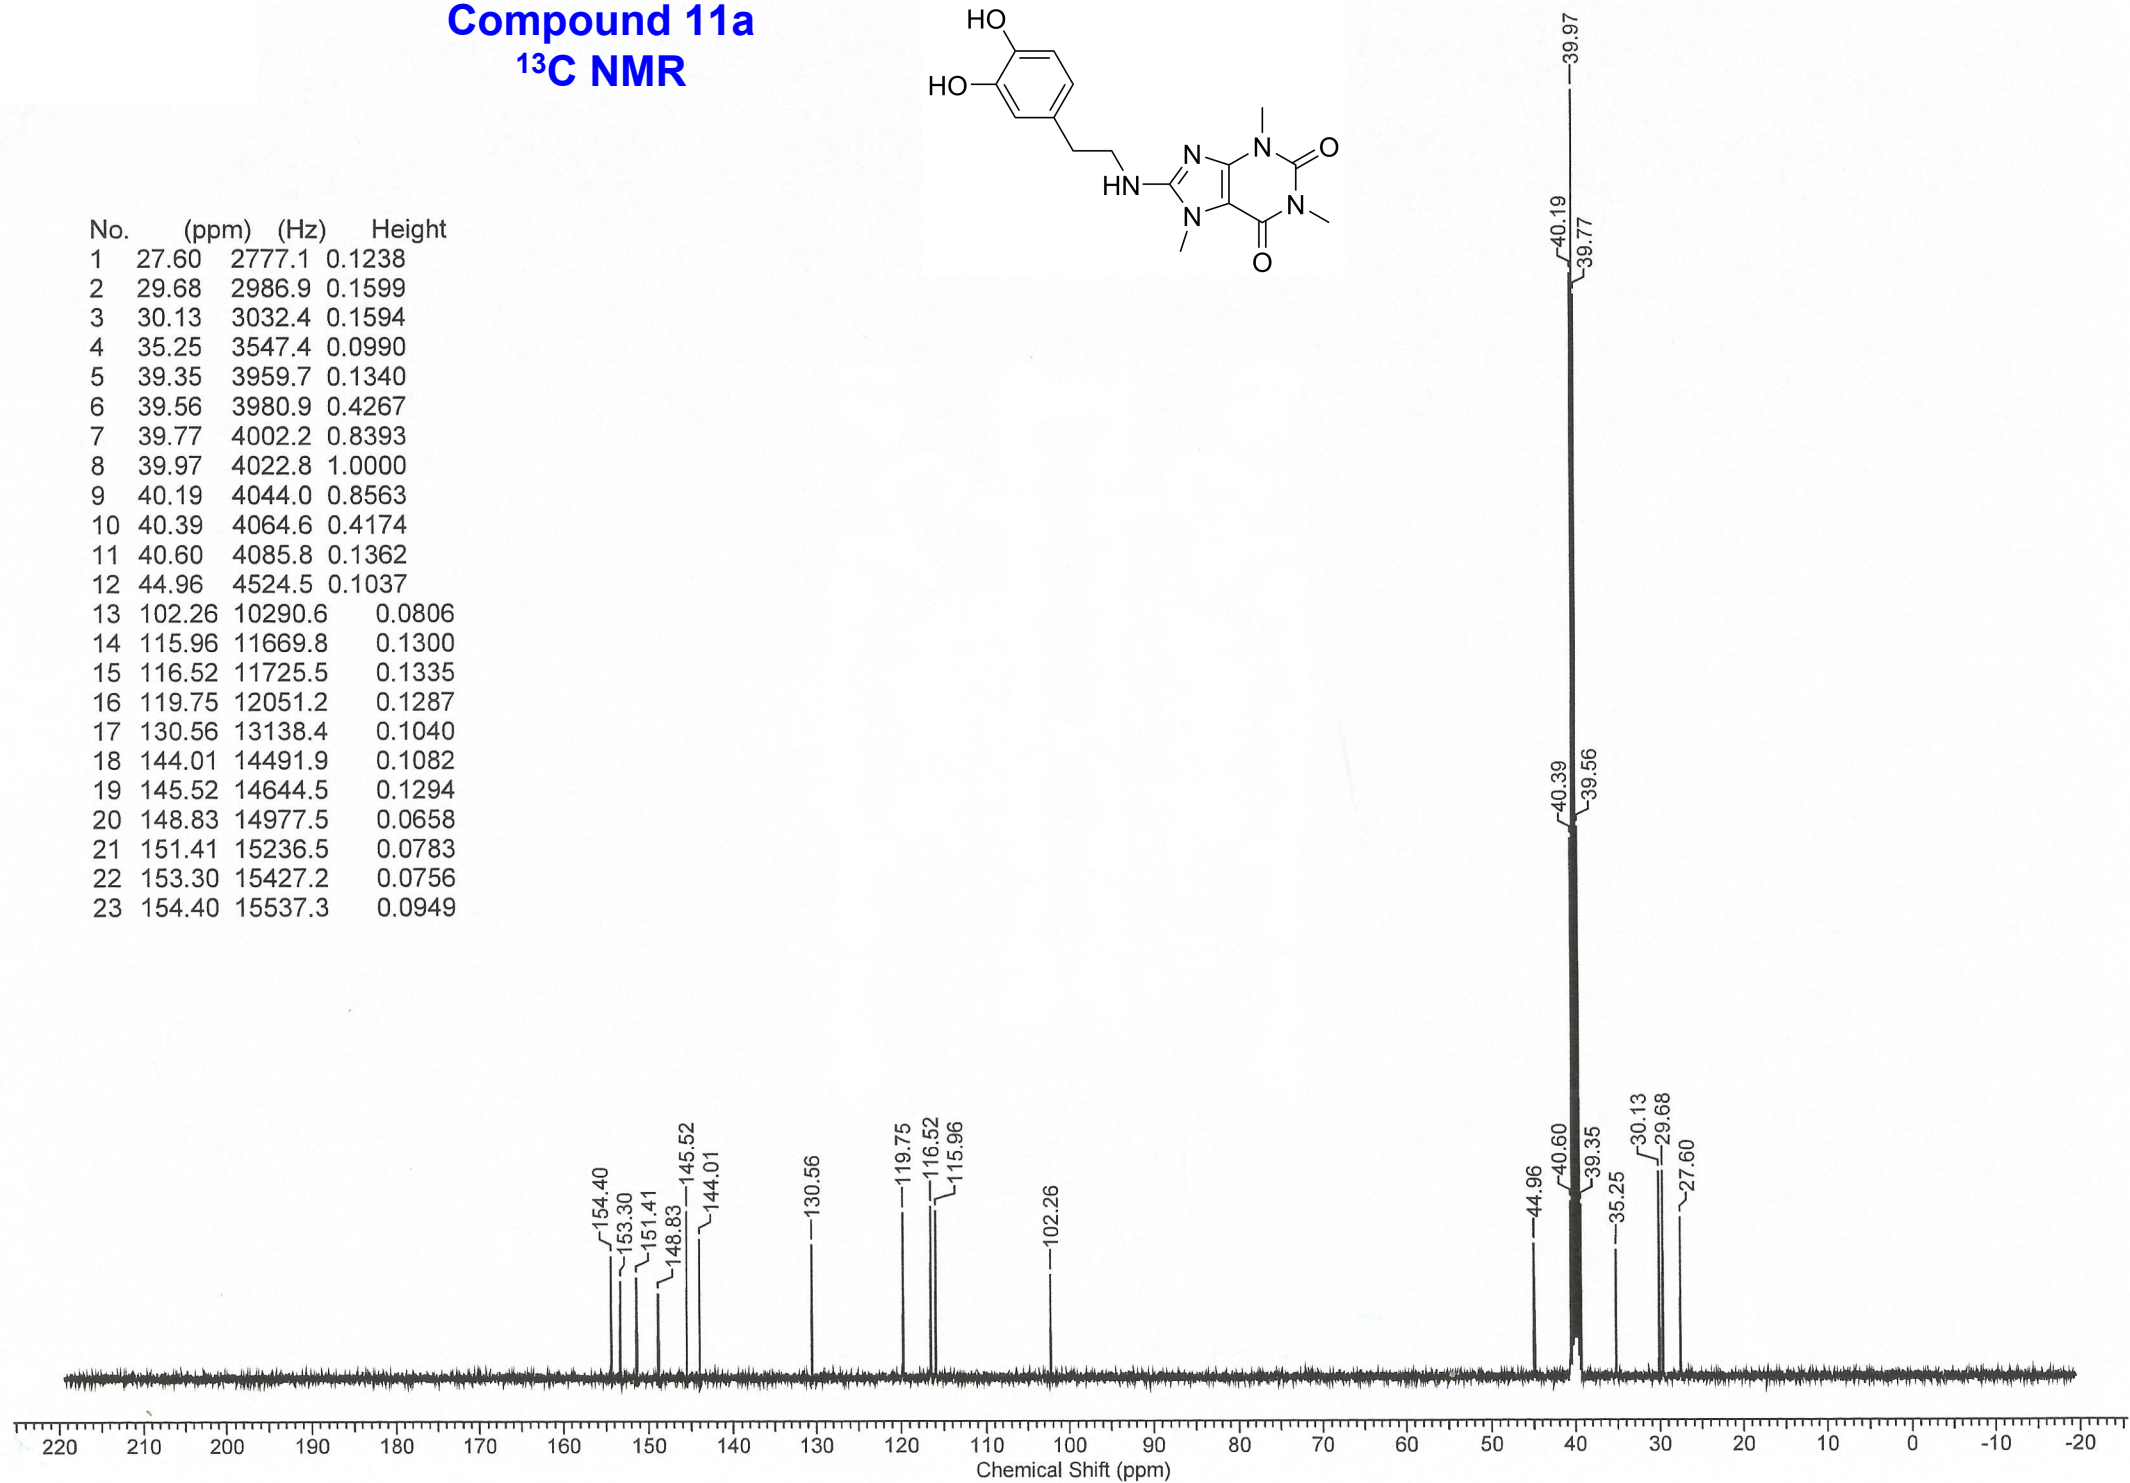

**Compound 11b**  
**<sup>1</sup>H NMR - zoom of the**  
**aliphatic region**

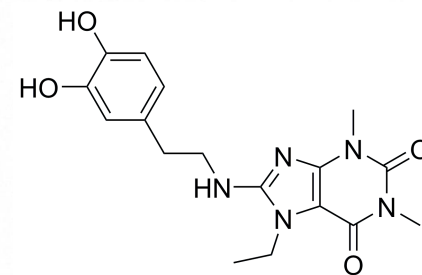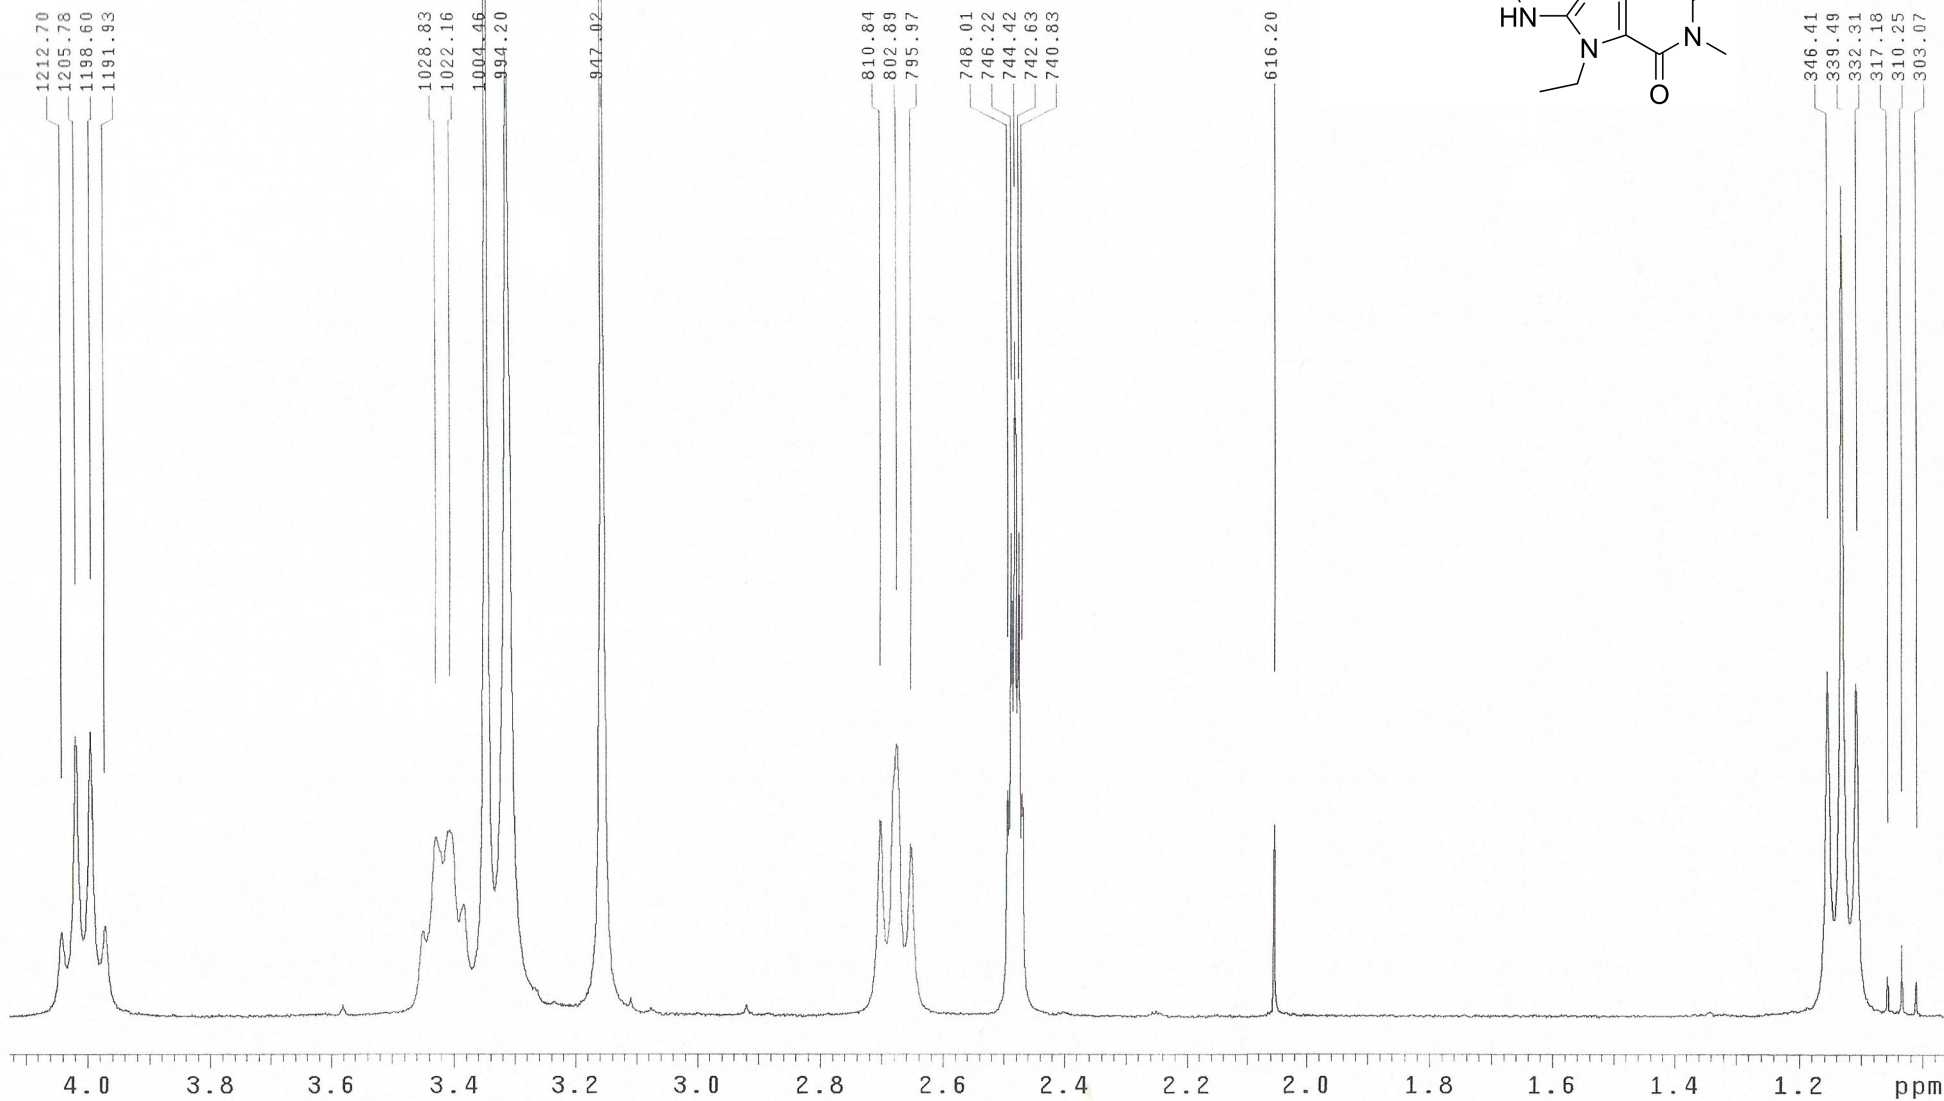

**Compound 11b**  
 **$^1\text{H}$  NMR - zoom of the**  
**aromatic region**

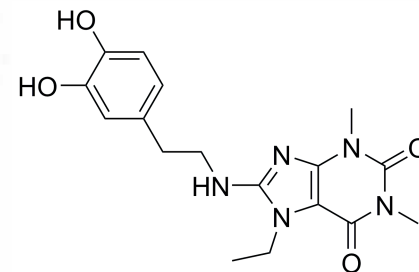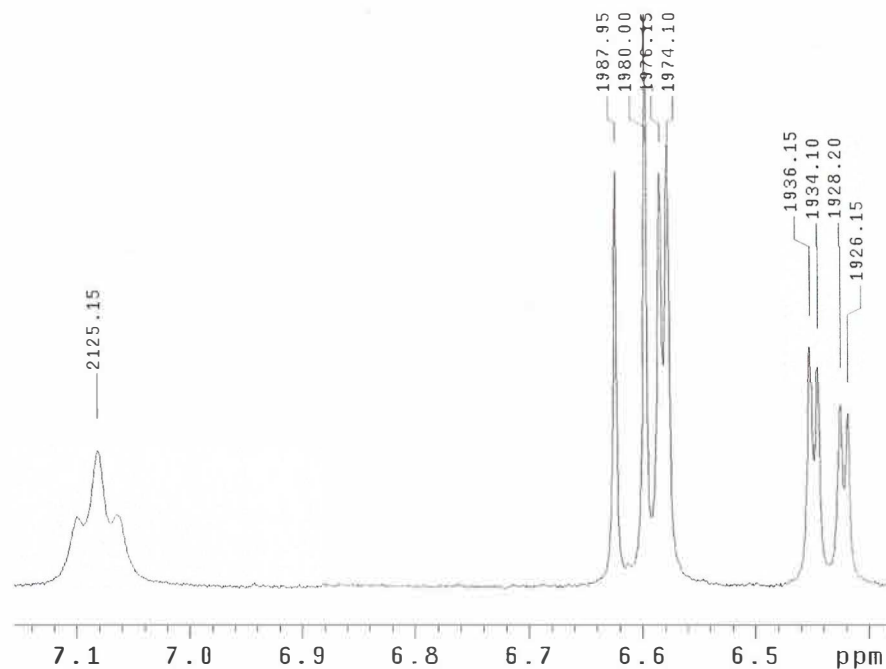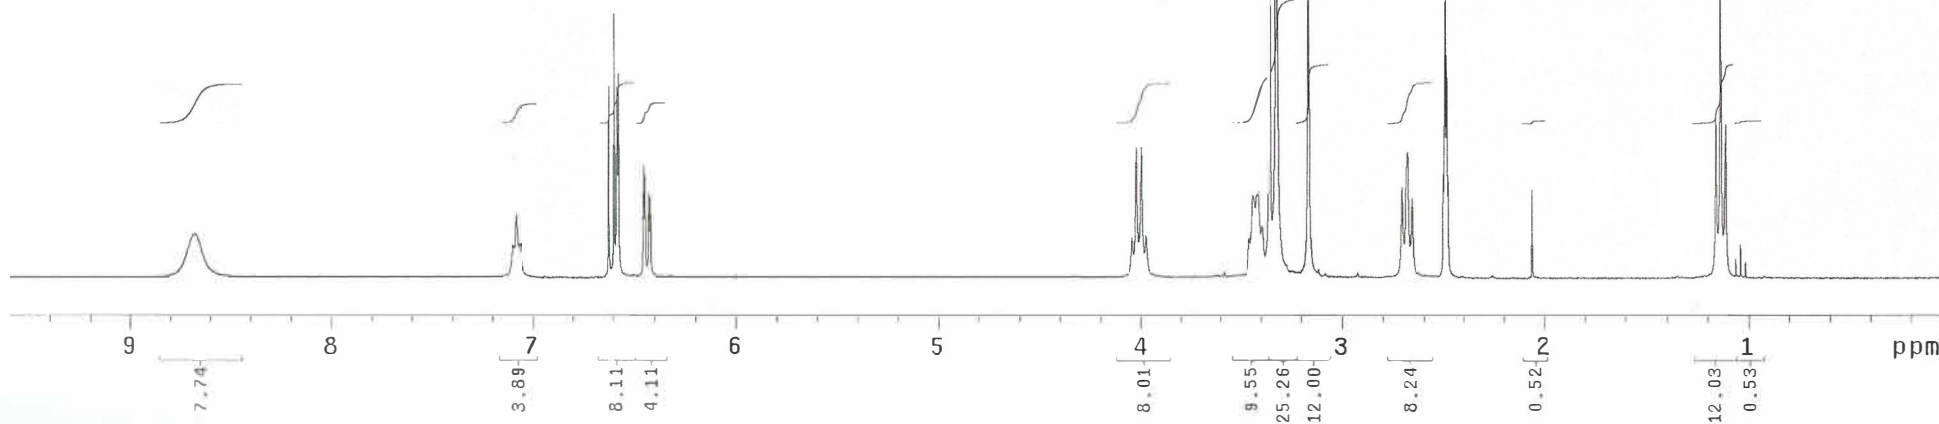

## Table of peaks

| INDEX | FREQUENCY       | PPM          | HEIGHT |
|-------|-----------------|--------------|--------|
| 1     | 2603.943        | 8.677        | 5.6    |
| 2     | 2130.536        | 7.100        | 4.2    |
| 3     | 2125.150        | 7.082        | 8.1    |
| 4     | 2120.021        | 7.065        | 4.3    |
| 5     | 1987.950        | 6.625        | 24.7   |
| 6     | 1980.000        | 6.598        | 34.1   |
| 7     | 1976.153        | 6.585        | 24.6   |
| 8     | 1974.101        | 6.579        | 26.4   |
| 9     | 1936.147        | 6.452        | 14.4   |
| 10    | 1934.095        | 6.445        | 13.2   |
| 11    | 1928.197        | 6.426        | 10.9   |
| 12    | 1926.145        | 6.419        | 10.3   |
| 13    | 1212.701        | 4.041        | 5.1    |
| 14    | 1205.776        | 4.018        | 16.7   |
| 15    | 1198.596        | 3.994        | 17.0   |
| 16    | 1191.928        | 3.972        | 5.4    |
| 17    | 1035.237        | 3.450        | 5.1    |
| 18    | 1028.826        | 3.428        | 10.7   |
| 19    | 1022.158        | 3.406        | 11.1   |
| 20    | 1015.490        | 3.384        | 6.7    |
| 21    | <u>1004.463</u> | <u>3.347</u> | 144.0  |
| 22    | 994.205         | 3.313        | 57.4   |
| 23    | <u>947.018</u>  | <u>3.156</u> | 128.4  |
| 24    | 810.843         | 2.702        | 11.7   |
| 25    | 802.893         | 2.676        | 16.3   |
| 26    | 795.969         | 2.653        | 10.3   |
| 27    | 748.013         | 2.493        | 13.5   |
| 28    | 746.218         | 2.487        | 28.9   |
| 29    | 744.422         | 2.481        | 40.3   |
| 30    | 742.627         | 2.475        | 28.9   |
| 31    | 740.832         | 2.469        | 13.3   |
| 32    | 616.197         | 2.053        | 11.4   |
| 33    | 346.412         | 1.154        | 20.6   |
| 34    | 339.487         | 1.131        | 49.6   |
| 35    | 332.307         | 1.107        | 19.9   |
| 36    | 310.252         | 1.034        | 4.3    |

# Compound 11b

## <sup>13</sup>C NMR

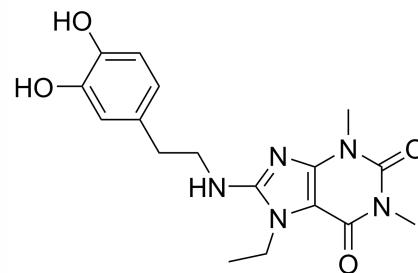

| No. | (ppm)  | (Hz)    | Height |
|-----|--------|---------|--------|
| 1   | 15.20  | 1530.0  | 0.1630 |
| 2   | 27.65  | 2782.2  | 0.1341 |
| 3   | 29.70  | 2989.1  | 0.1656 |
| 4   | 35.17  | 3539.3  | 0.1102 |
| 5   | 37.90  | 3814.4  | 0.0806 |
| 6   | 39.35  | 3959.7  | 0.1373 |
| 7   | 39.56  | 3980.9  | 0.4177 |
| 8   | 39.76  | 4001.5  | 0.8423 |
| 9   | 39.97  | 4022.8  | 1.0000 |
| 10  | 40.19  | 4044.0  | 0.8266 |
| 11  | 40.39  | 4064.6  | 0.4251 |
| 12  | 40.60  | 4085.8  | 0.1411 |
| 13  | 44.89  | 4517.2  | 0.1091 |
| 14  | 101.45 | 10209.2 | 0.0952 |
| 15  | 115.92 | 11665.3 | 0.1346 |
| 16  | 116.57 | 11730.6 | 0.1397 |
| 17  | 119.80 | 12055.6 | 0.1379 |
| 18  | 130.60 | 13142.8 | 0.1127 |
| 19  | 143.99 | 14489.7 | 0.1181 |
| 20  | 145.52 | 14643.7 | 0.1509 |
| 21  | 149.14 | 15008.3 | 0.0868 |
| 22  | 151.45 | 15240.9 | 0.0865 |
| 23  | 153.05 | 15401.6 | 0.0951 |
| 24  | 153.43 | 15440.4 | 0.1005 |

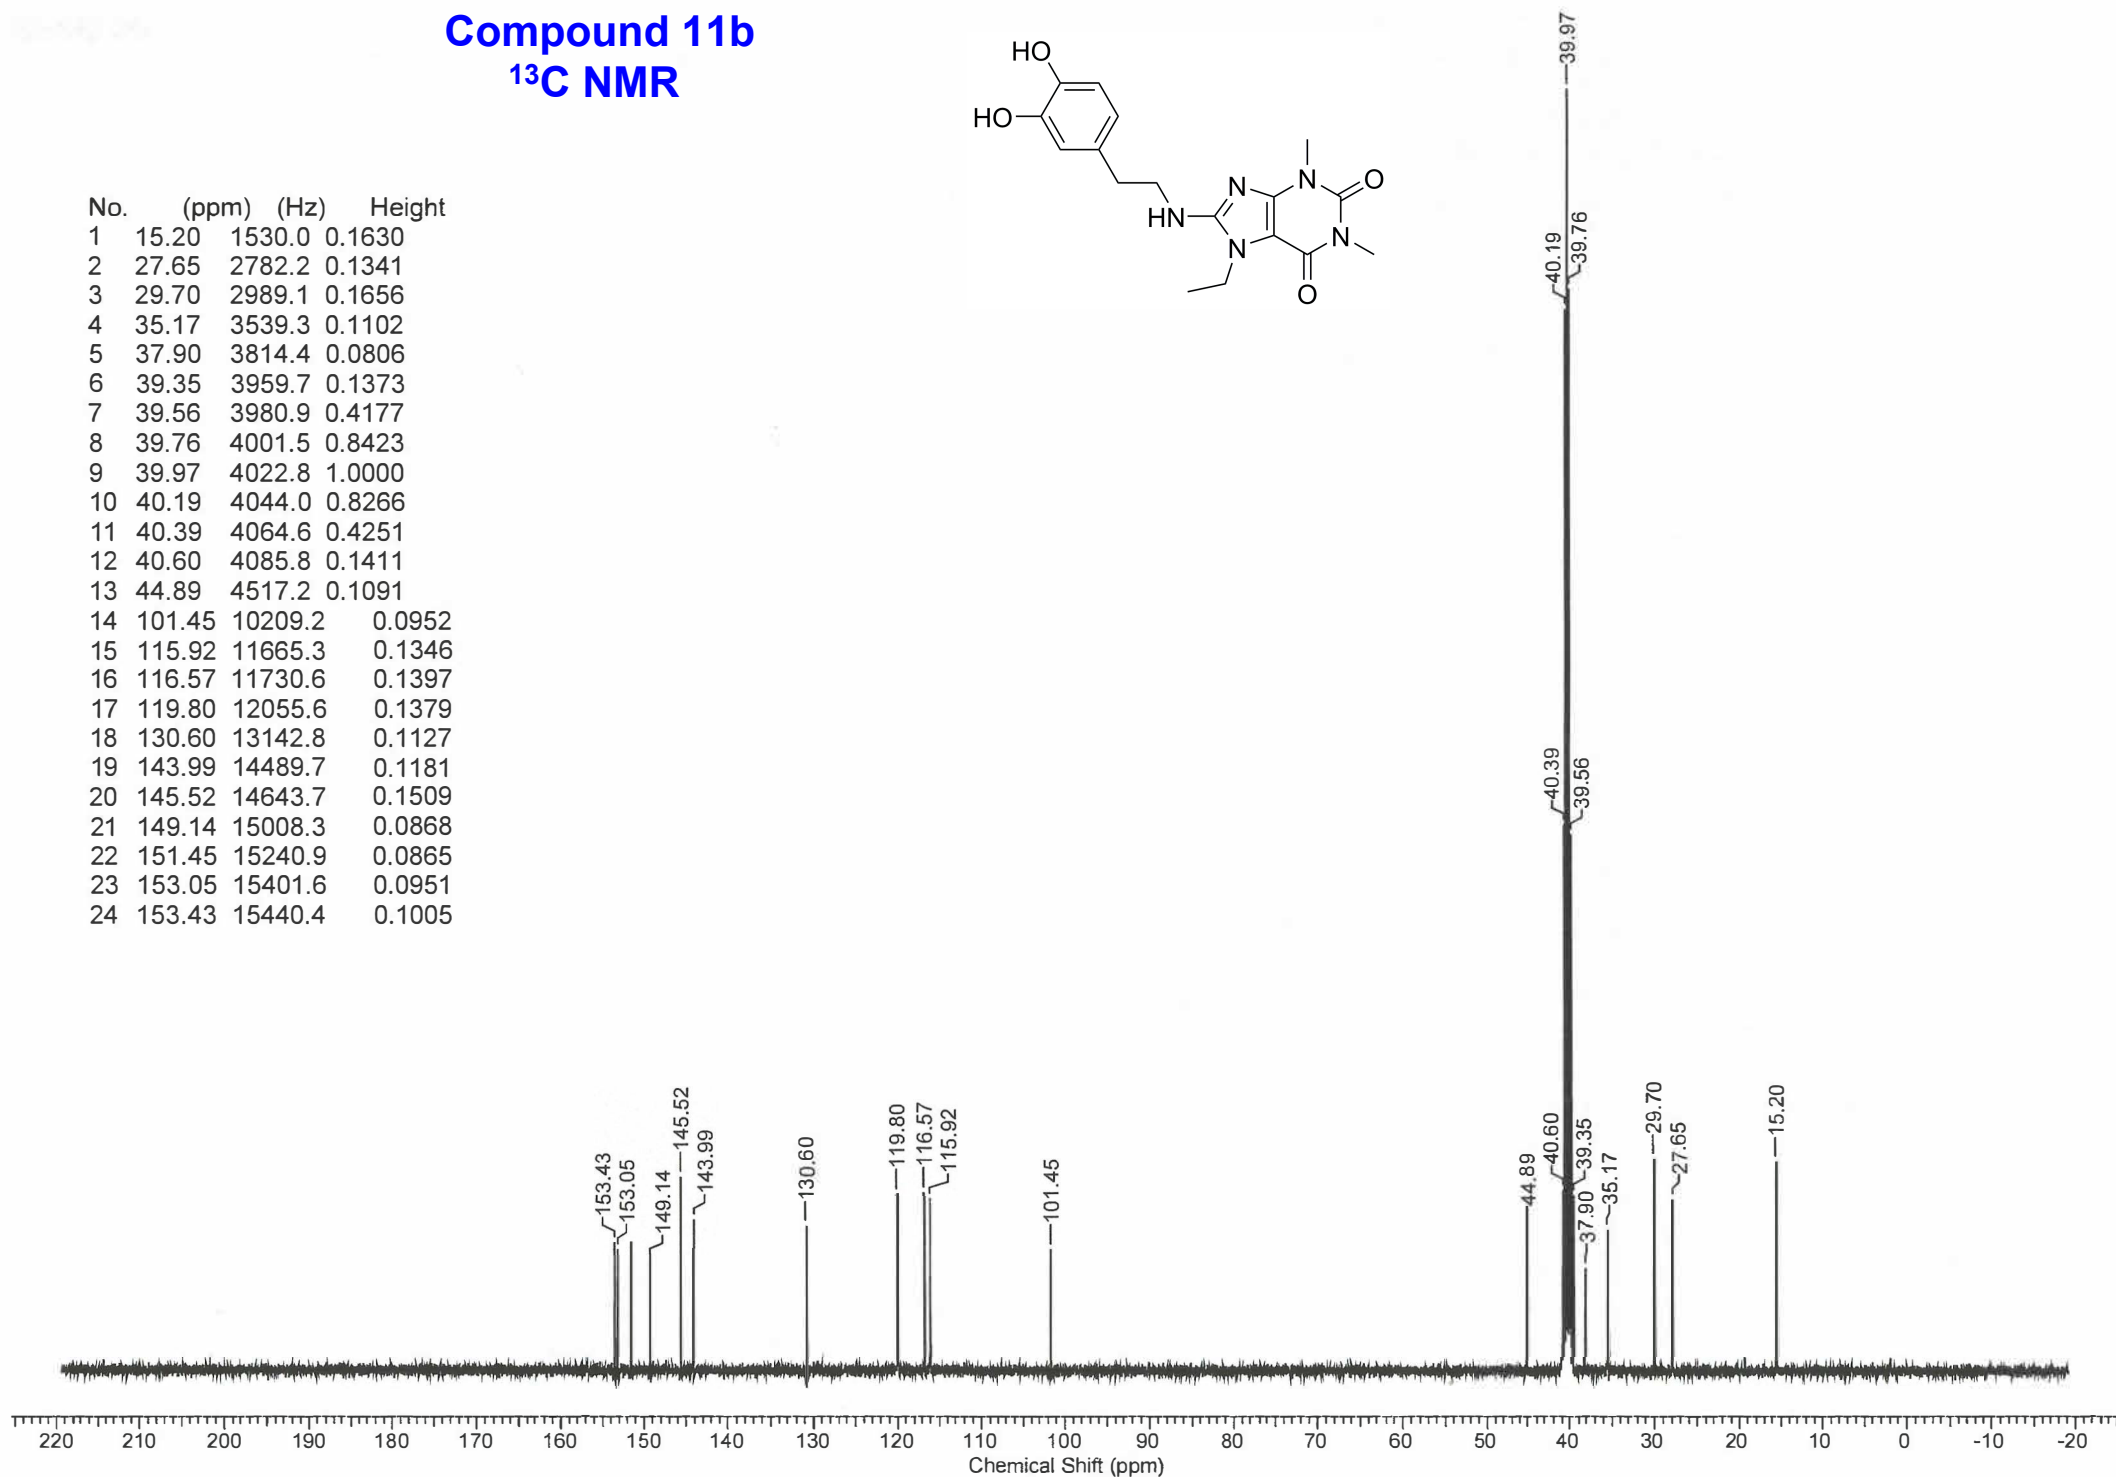

7-ethyl dopamine

**Compound 11c**  
 **$^1\text{H}$  NMR**

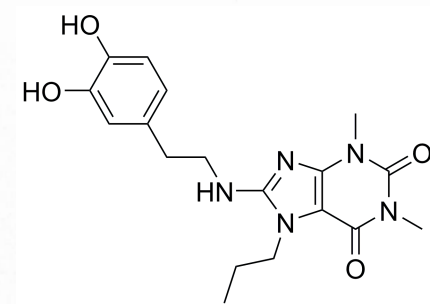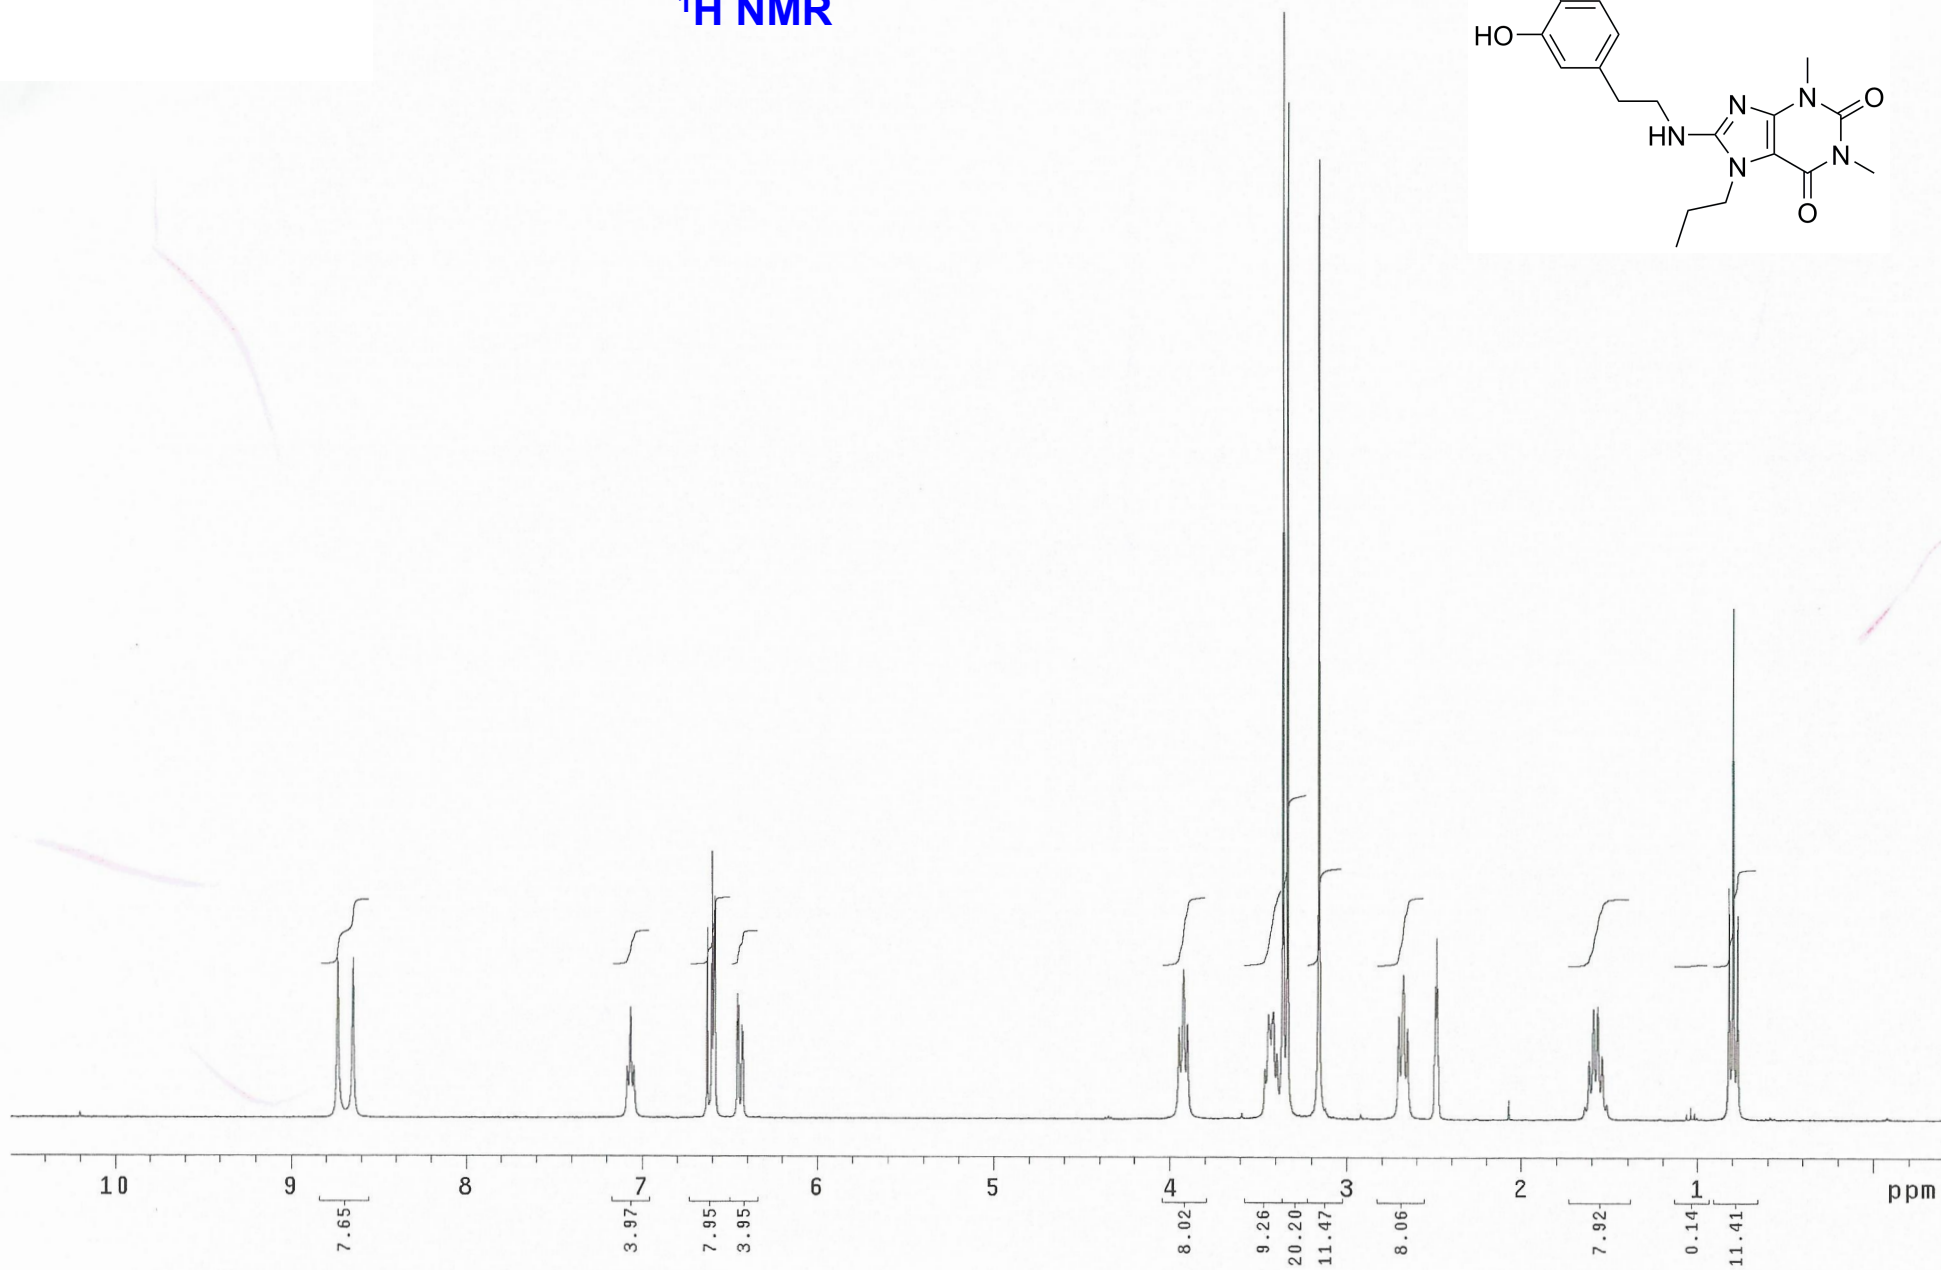

**Compound 11c**  
**<sup>1</sup>H NMR - zoom of the**  
**aliphatic region**

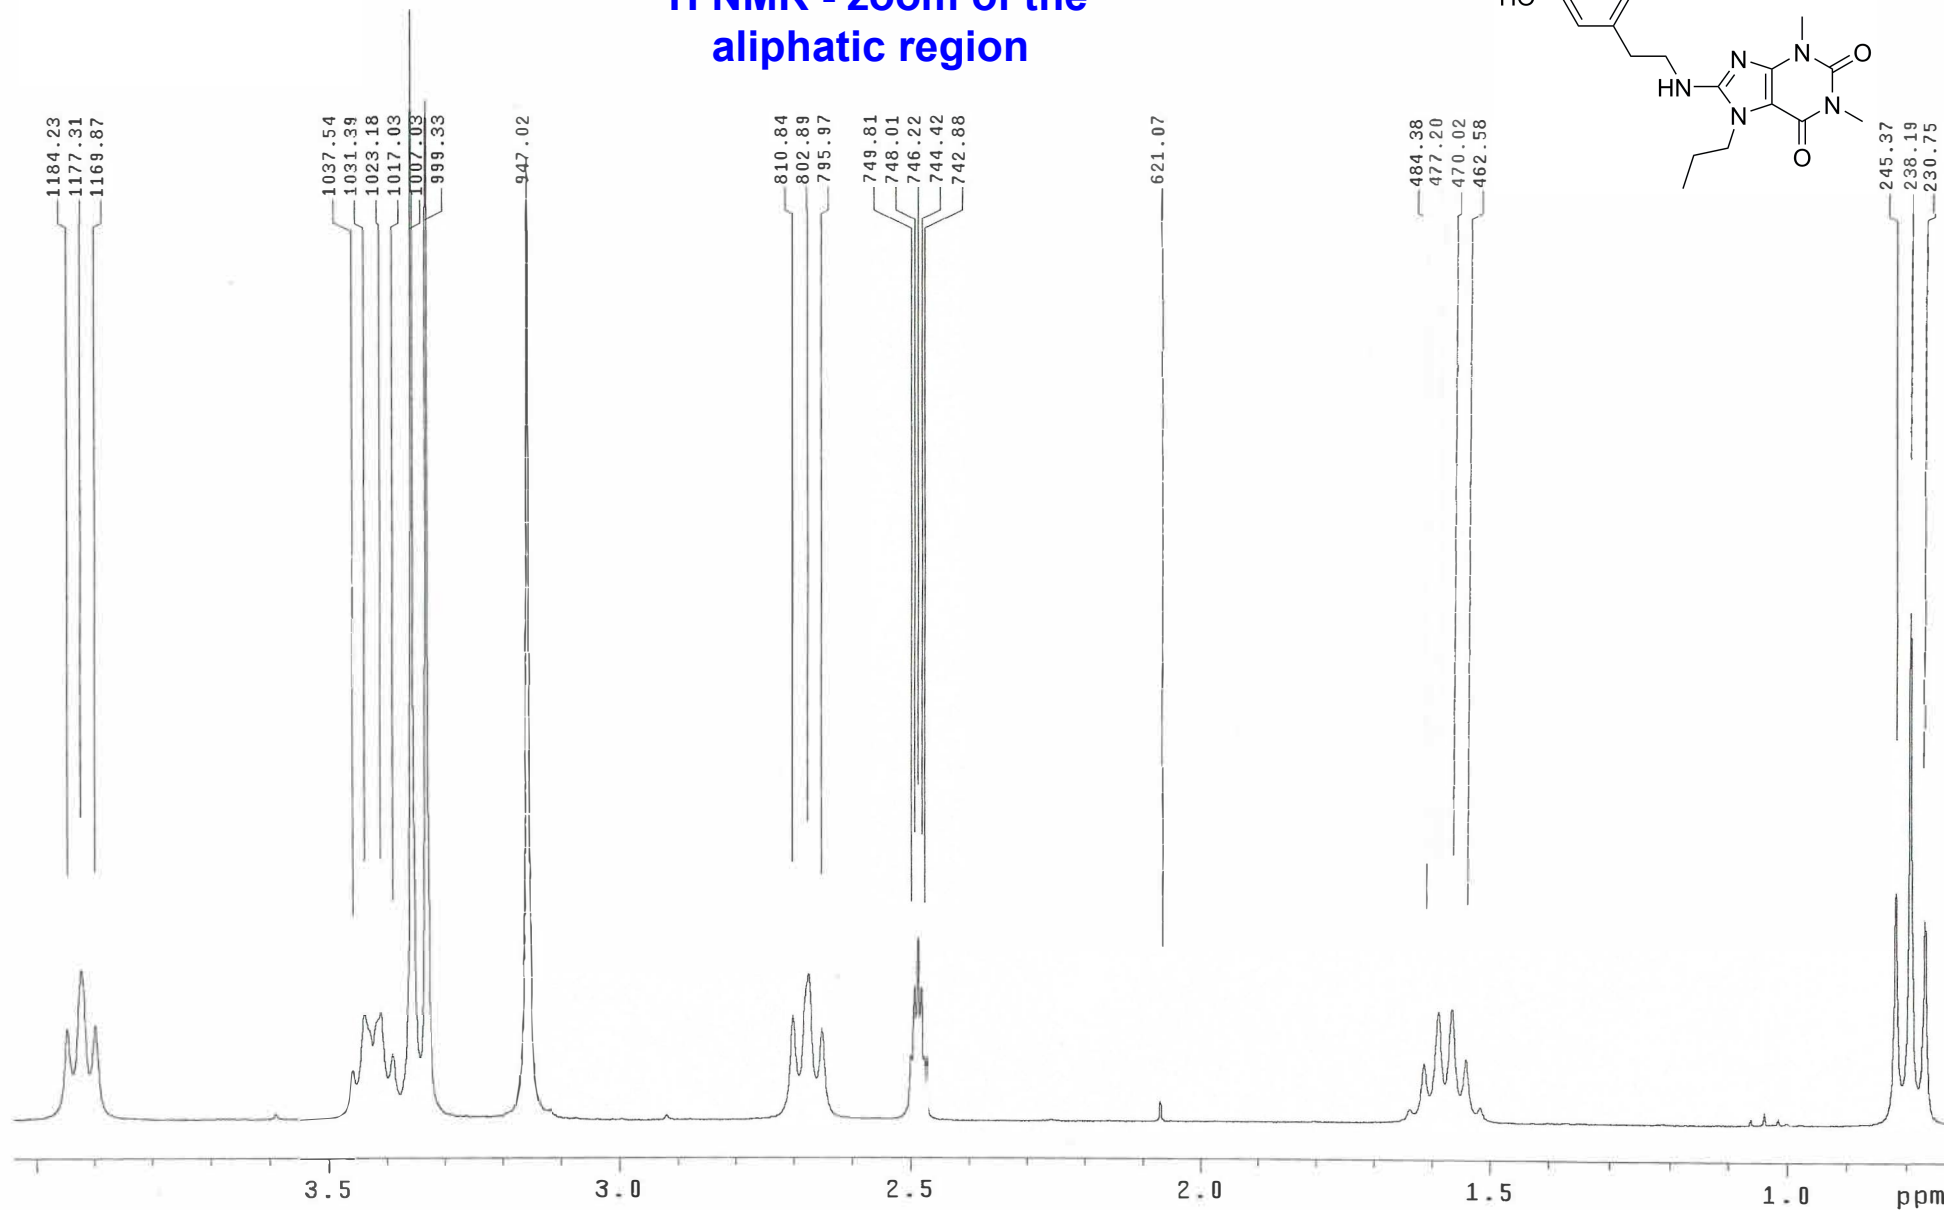

**Compound 11c**  
**<sup>1</sup>H NMR - zoom of the**  
**aromatic region**

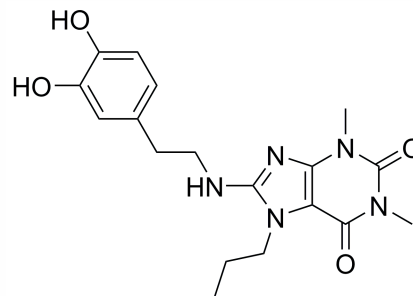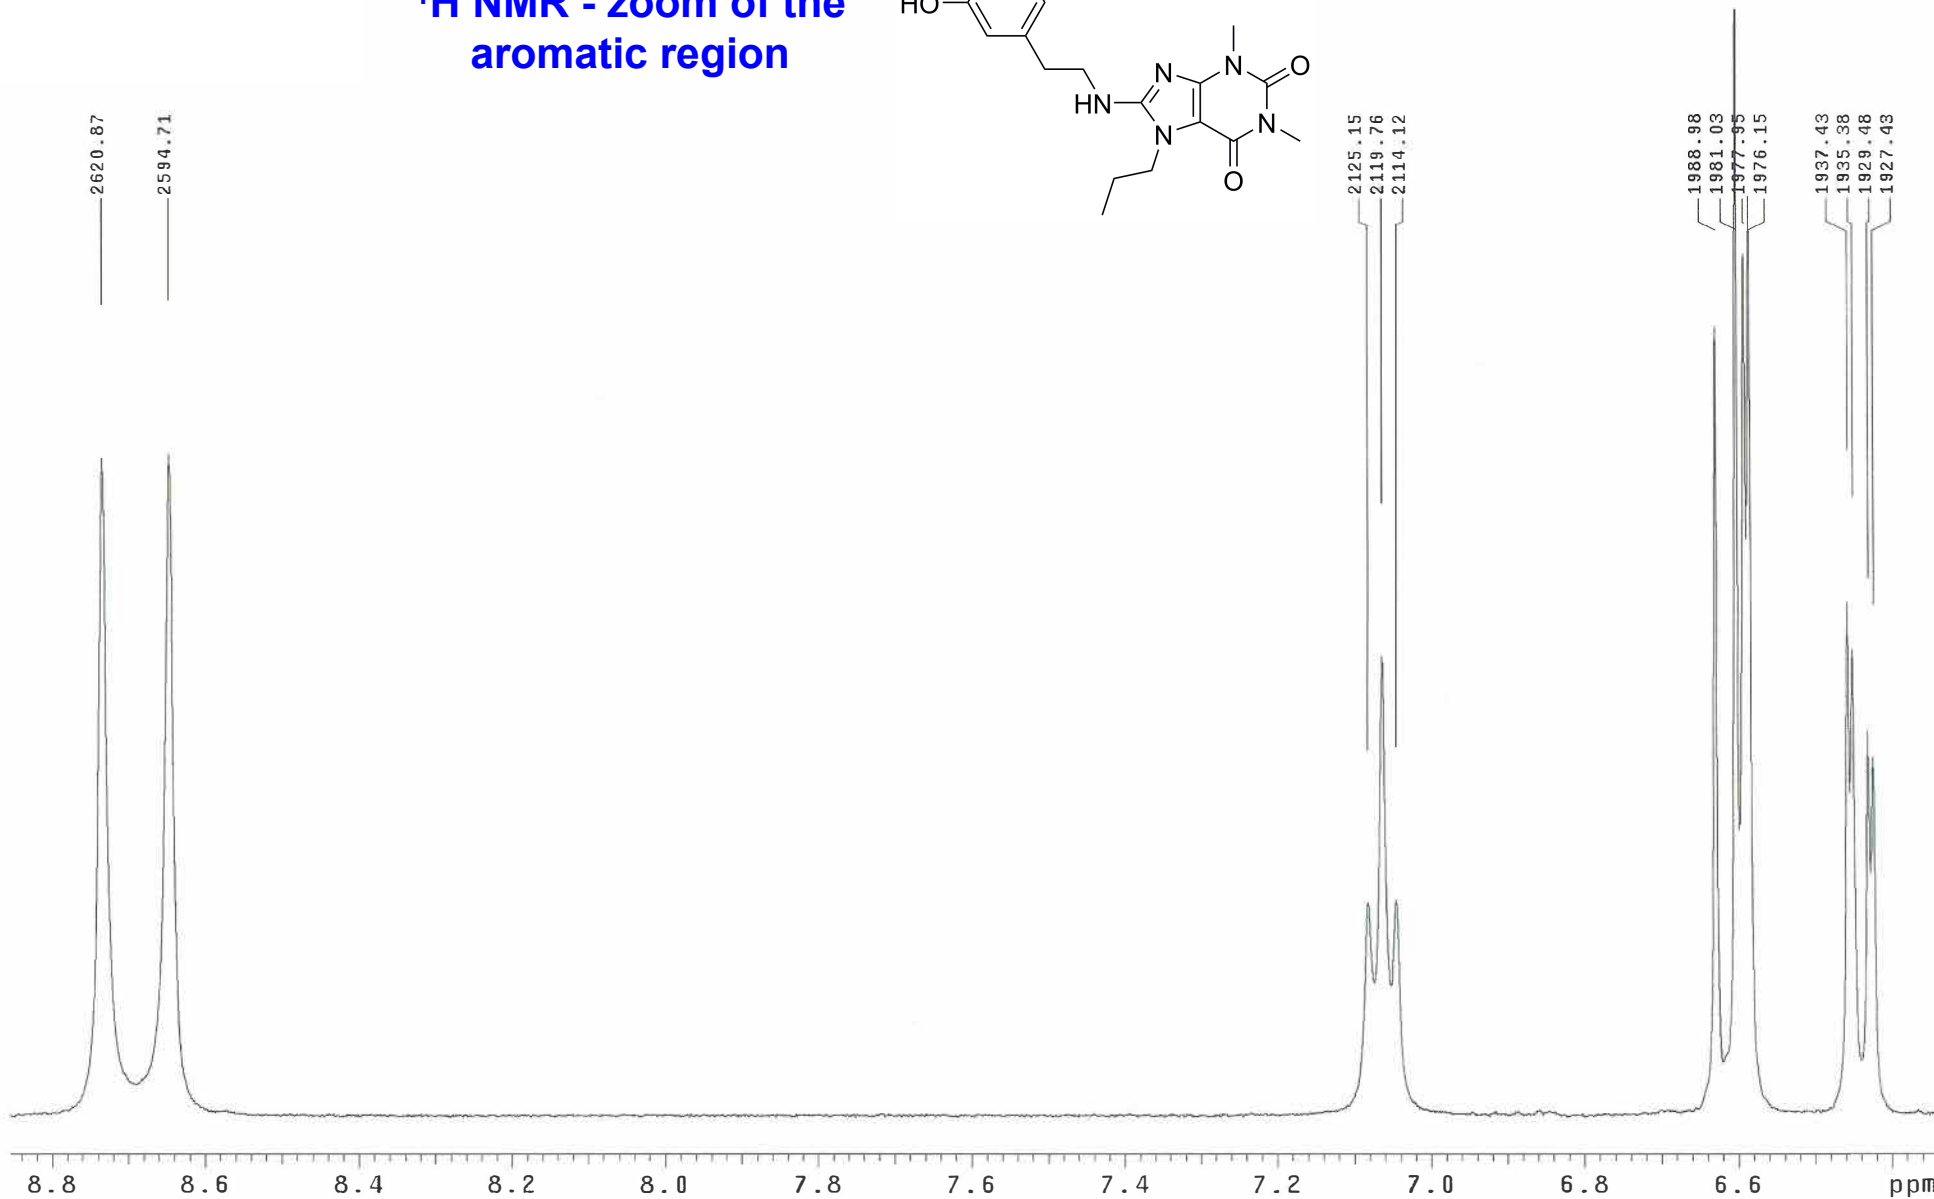

## Table of peaks

| INDEX | FREQUENCY | PPM   | HEIGHT | INDEX | FREQUENCY | PPM | HEIGHT |
|-------|-----------|-------|--------|-------|-----------|-----|--------|
| 1     | 2620.869  | 8.734 | 20.6   |       |           |     |        |
| 2     | 2594.711  | 8.647 | 20.8   |       |           |     |        |
| 3     | 2125.150  | 7.082 | 6.7    |       |           |     |        |
| 4     | 2119.765  | 7.064 | 14.4   |       |           |     |        |
| 5     | 2114.123  | 7.045 | 6.8    |       |           |     |        |
| 6     | 1988.975  | 6.628 | 24.8   |       |           |     |        |
| 7     | 1981.025  | 6.602 | 34.7   |       |           |     |        |
| 8     | 1977.948  | 6.591 | 27.0   |       |           |     |        |
| 9     | 1976.153  | 6.585 | 28.8   |       |           |     |        |
| 10    | 1937.429  | 6.456 | 16.1   |       |           |     |        |
| 11    | 1935.377  | 6.450 | 14.6   |       |           |     |        |
| 12    | 1929.479  | 6.430 | 12.1   |       |           |     |        |
| 13    | 1927.427  | 6.423 | 11.3   |       |           |     |        |
| 14    | 1184.235  | 3.946 | 12.0   |       |           |     |        |
| 15    | 1177.310  | 3.923 | 19.5   |       |           |     |        |
| 16    | 1169.873  | 3.899 | 12.4   |       |           |     |        |
| 17    | 1037.545  | 3.458 | 6.5    |       |           |     |        |
| 18    | 1031.390  | 3.437 | 13.6   |       |           |     |        |
| 19    | 1023.184  | 3.410 | 14.0   |       |           |     |        |
| 20    | 1017.029  | 3.389 | 8.5    |       |           |     |        |
| 21    | 1007.027  | 3.356 | 144.0  |       |           |     |        |
| 22    | 999.334   | 3.330 | 132.1  |       |           |     |        |
| 23    | 947.018   | 3.156 | 124.8  |       |           |     |        |
| 24    | 810.843   | 2.702 | 13.4   |       |           |     |        |
| 25    | 802.893   | 2.676 | 18.8   |       |           |     |        |
| 26    | 795.969   | 2.653 | 11.8   |       |           |     |        |
| 27    | 749.808   | 2.499 | 8.4    |       |           |     |        |
| 28    | 748.013   | 2.493 | 17.4   |       |           |     |        |
| 29    | 746.218   | 2.487 | 23.6   |       |           |     |        |
| 30    | 744.422   | 2.481 | 17.1   |       |           |     |        |
| 31    | 742.884   | 2.476 | 8.2    |       |           |     |        |
| 32    | 621.070   | 2.070 | 2.5    |       |           |     |        |
| 33    | 484.382   | 1.614 | 7.7    |       |           |     |        |
| 34    | 477.201   | 1.590 | 14.4   |       |           |     |        |
| 35    | 470.021   | 1.566 | 14.8   |       |           |     |        |
| 36    | 462.584   | 1.542 | 8.3    |       |           |     |        |
| 37    | 245.370   | 0.818 | 30.2   |       |           |     |        |
| 38    | 238.190   | 0.794 | 66.8   |       |           |     |        |
| 39    | 230.753   | 0.769 | 26.6   |       |           |     |        |

# Compound 11c <sup>13</sup>C NMR

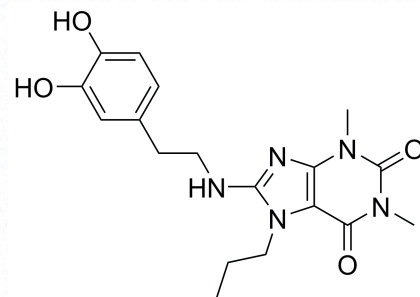

| No. | (ppm)  | (Hz)    | Height |
|-----|--------|---------|--------|
| 1   | 14.31  | 1439.8  | 0.1394 |
| 2   | 22.27  | 2241.6  | 0.1254 |
| 3   | 27.65  | 2782.2  | 0.1055 |
| 4   | 28.36  | 2854.1  | 0.1136 |
| 5   | 29.19  | 2937.8  | 0.0825 |
| 6   | 29.68  | 2986.9  | 0.1085 |
| 7   | 35.27  | 3548.8  | 0.0611 |
| 8   | 39.37  | 3961.9  | 0.1362 |
| 9   | 39.58  | 3983.1  | 0.4205 |
| 10  | 39.78  | 4003.7  | 0.8399 |
| 11  | 40.00  | 4025.0  | 1.0000 |
| 12  | 40.21  | 4046.2  | 0.8259 |
| 13  | 40.41  | 4066.8  | 0.4225 |
| 14  | 40.62  | 4088.0  | 0.1367 |
| 15  | 42.78  | 4305.2  | 0.0494 |
| 16  | 44.62  | 4490.1  | 0.0650 |
| 17  | 55.82  | 5616.9  | 0.0941 |
| 18  | 55.98  | 5633.0  | 0.0933 |
| 19  | 101.83 | 10247.3 | 0.0522 |
| 20  | 112.34 | 11305.2 | 0.0721 |
| 21  | 113.10 | 11381.4 | 0.0735 |
| 22  | 121.07 | 12183.3 | 0.0809 |
| 23  | 132.37 | 13321.1 | 0.0668 |
| 24  | 147.72 | 14865.3 | 0.0492 |
| 25  | 149.00 | 14994.4 | 0.0568 |
| 26  | 149.10 | 15003.9 | 0.0630 |
| 27  | 151.44 | 15239.4 | 0.0606 |
| 28  | 153.04 | 15400.8 | 0.0514 |
| 29  | 153.69 | 15466.1 | 0.0593 |

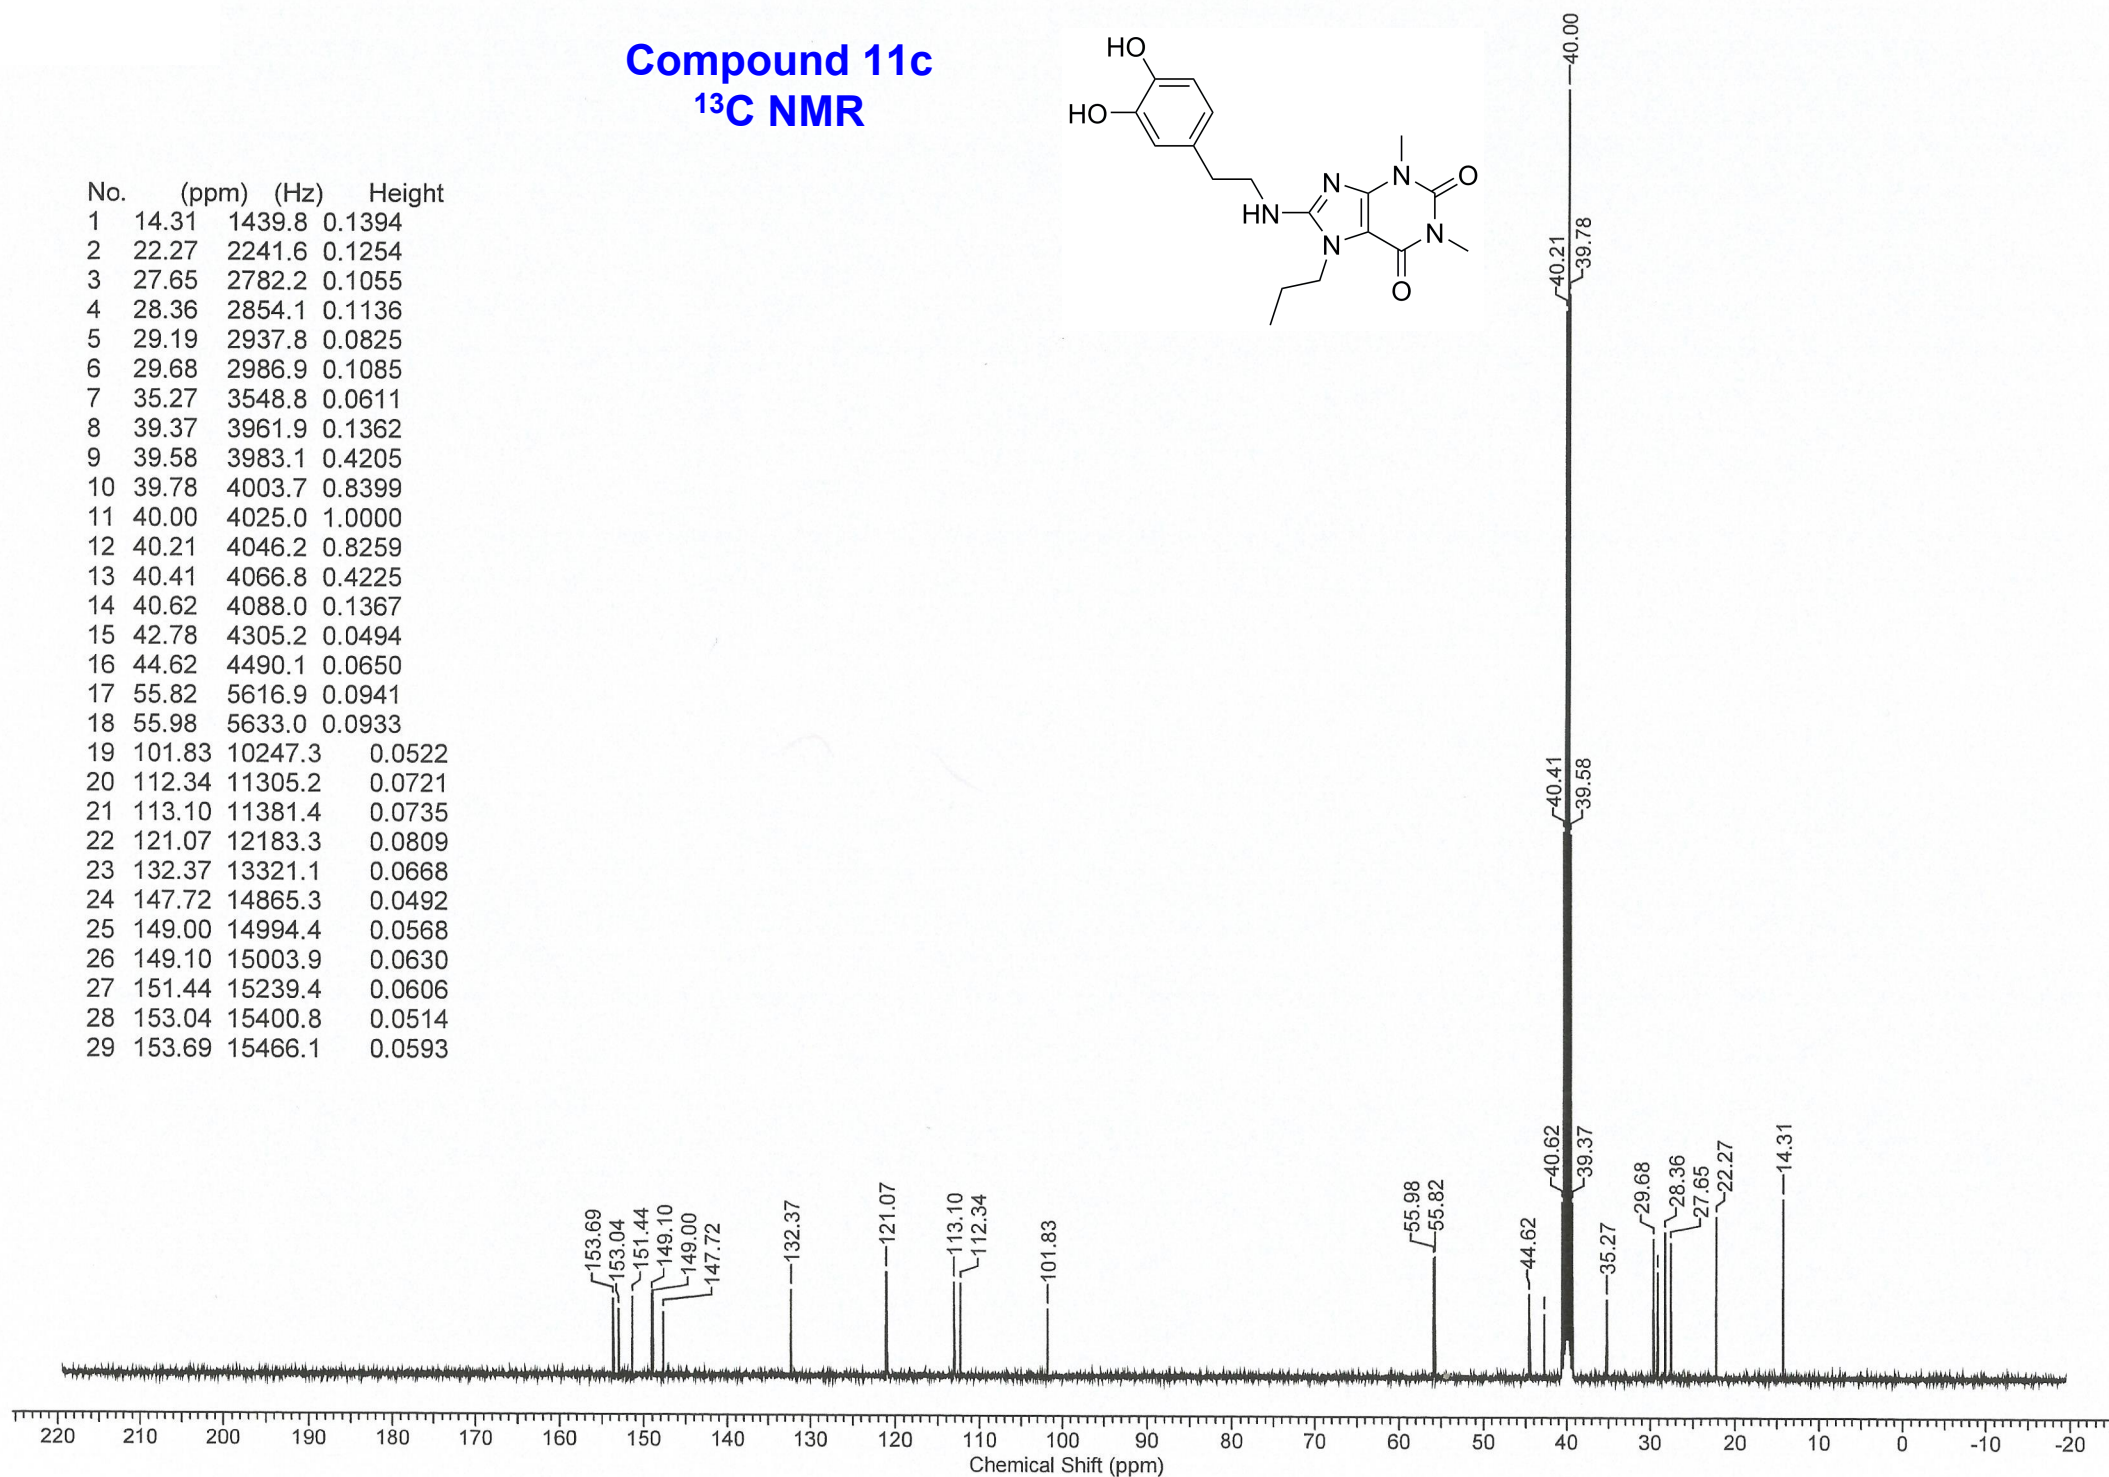

**Compound 11d**  
**<sup>1</sup>H NMR**

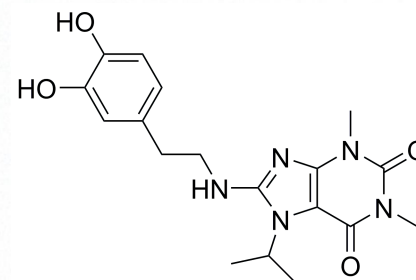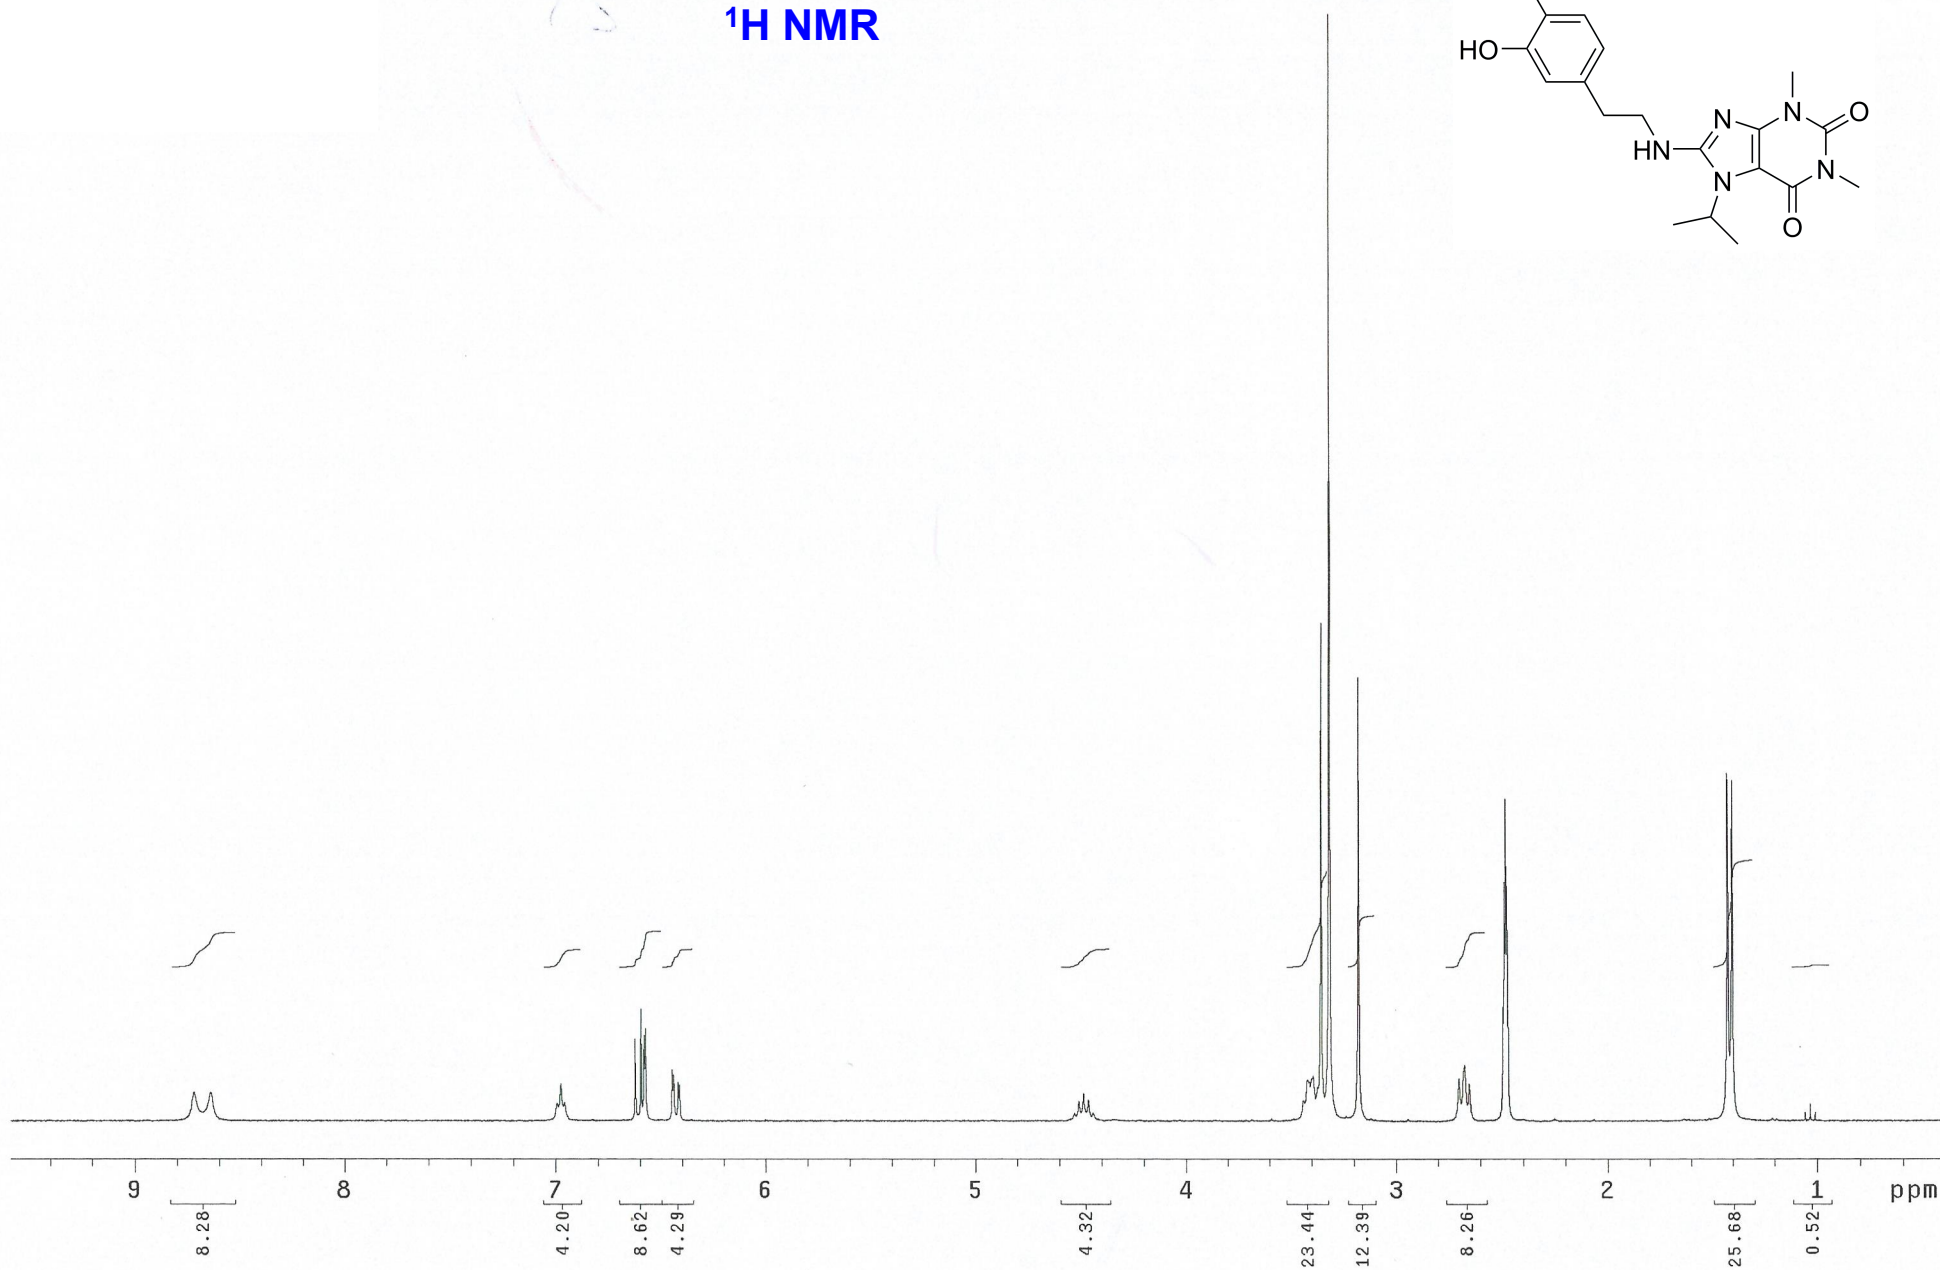

**Compound 11d**  
 **$^1\text{H}$  NMR - zoom of the**  
**aliphatic region**

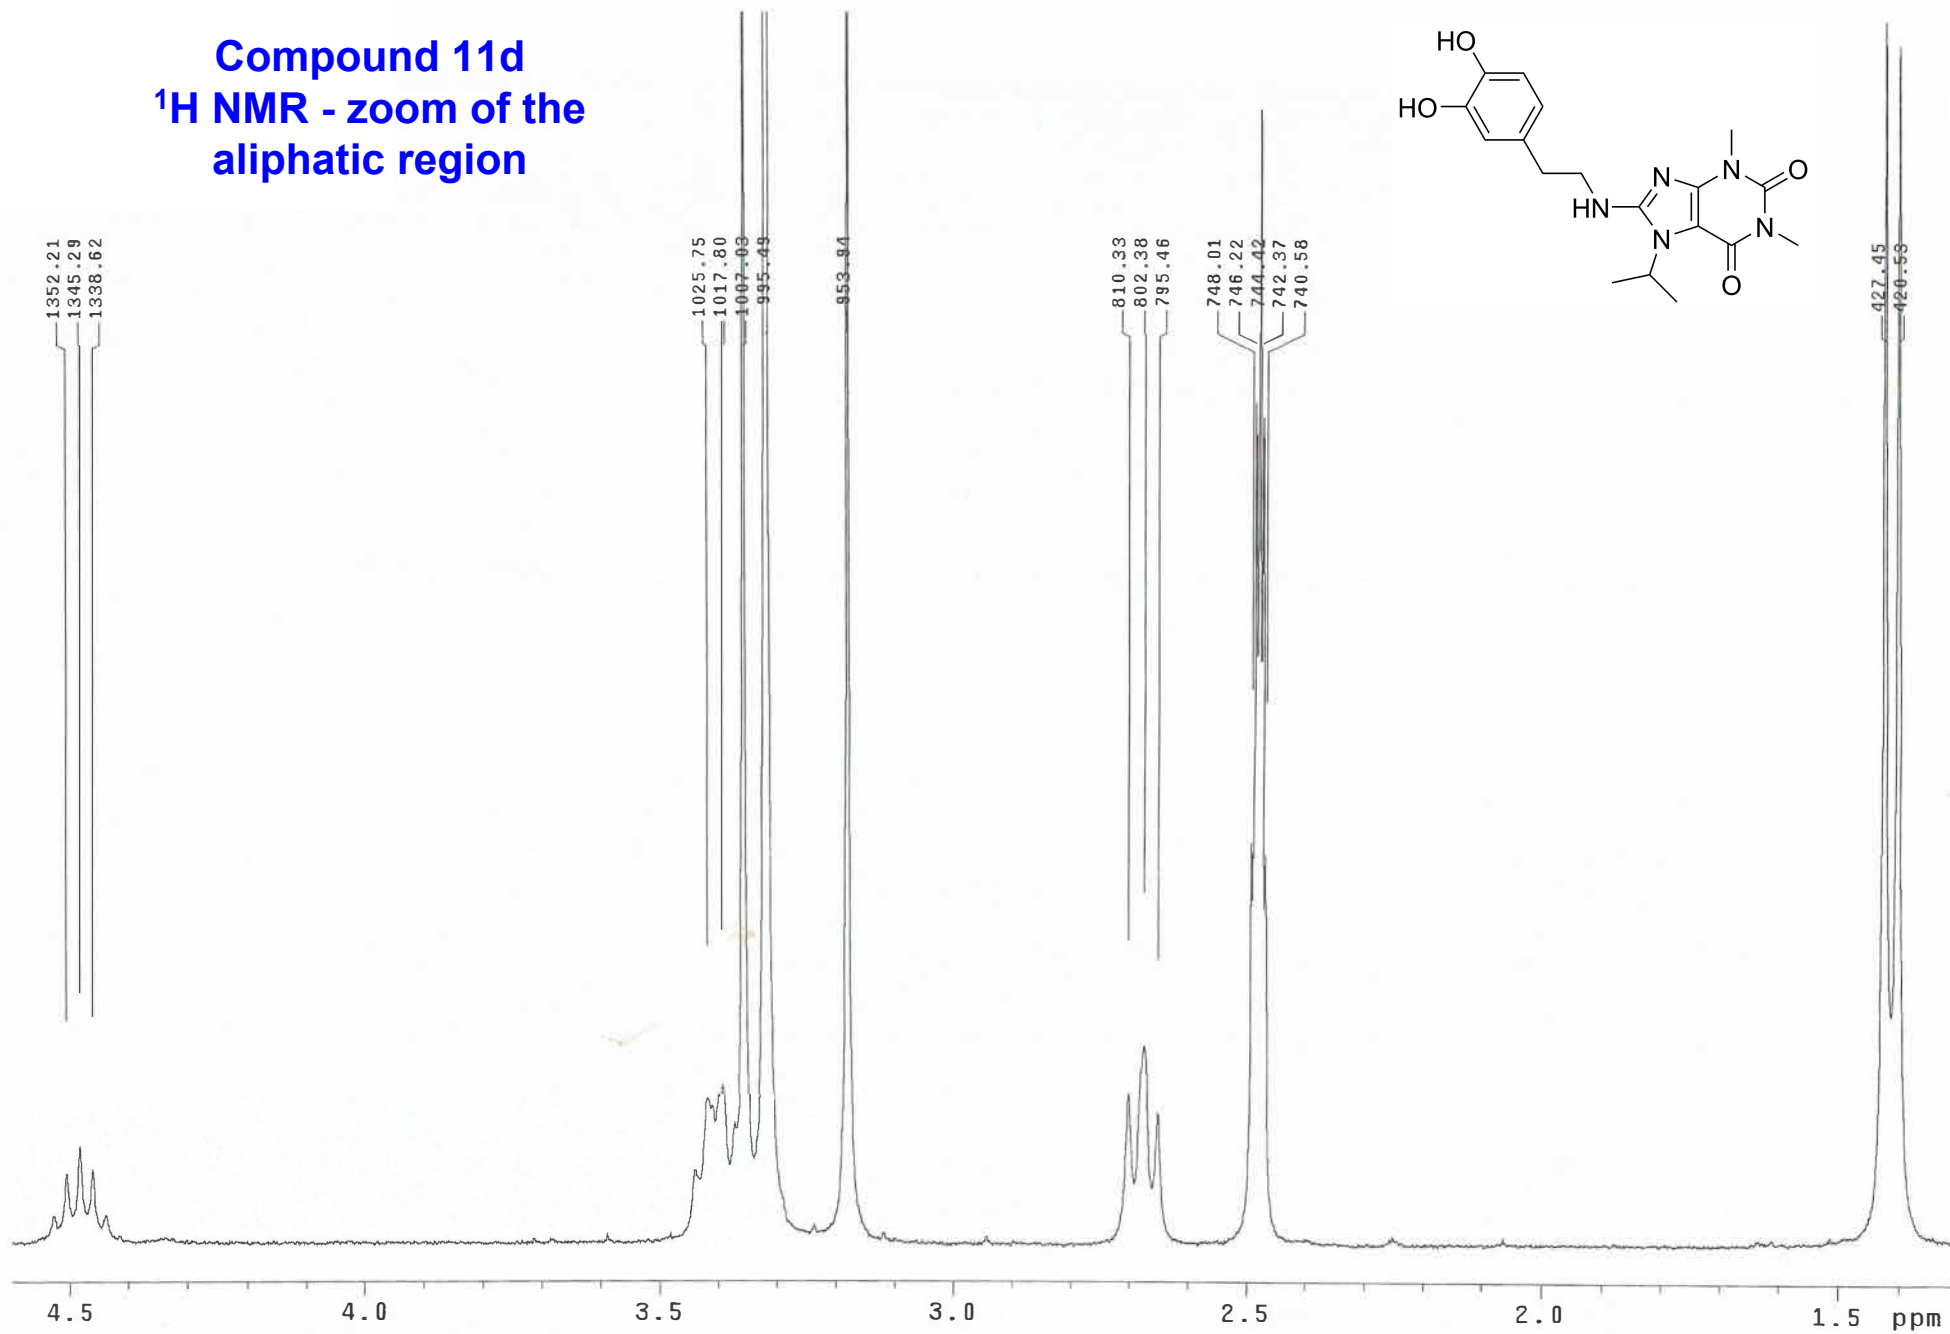

**Compound 11d**  
 **$^1\text{H}$  NMR - zoom of the**  
**aromatic region**

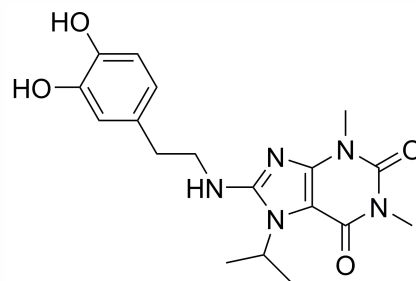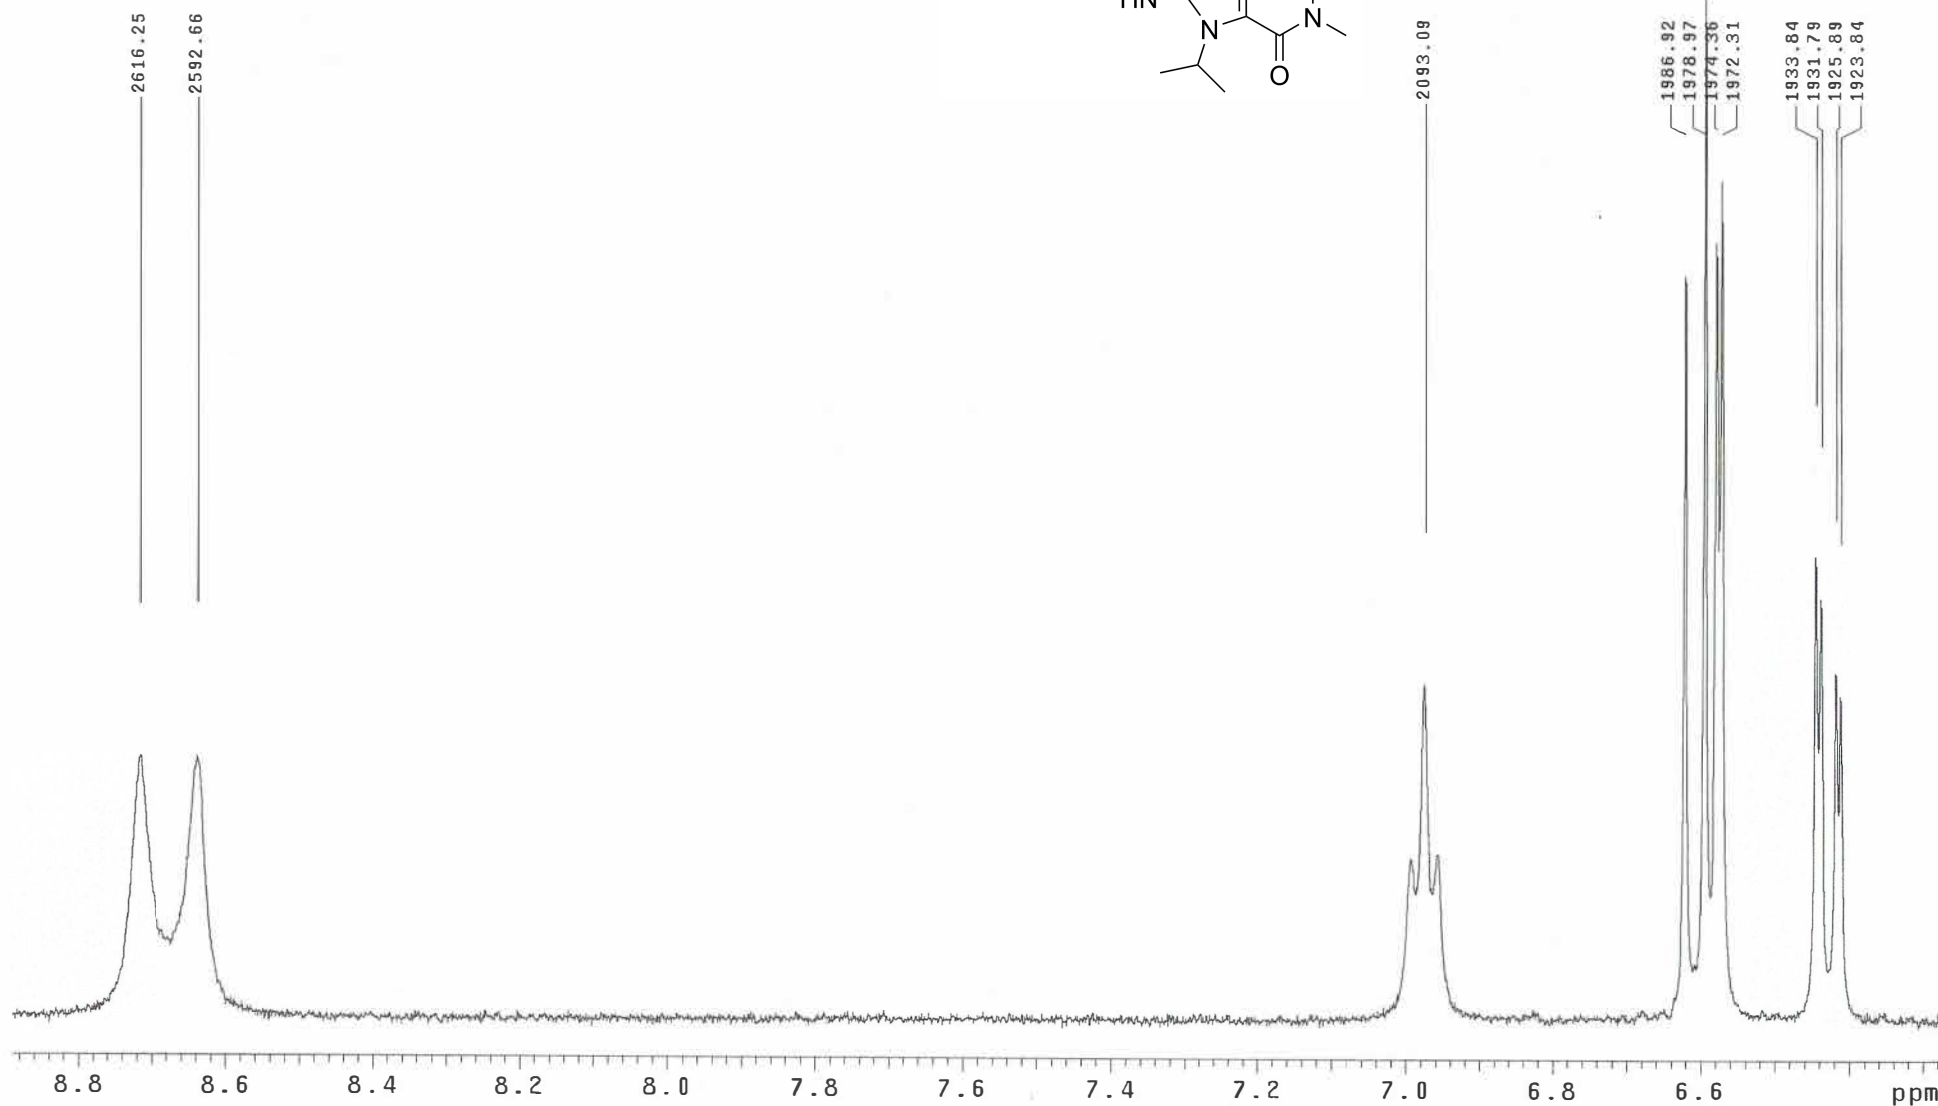

## Table of peaks

| INDEX | FREQUENCY | PPM   | HEIGHT |
|-------|-----------|-------|--------|
| 1     | 2616.253  | 8.719 | 3.7    |
| 2     | 2592.659  | 8.640 | 3.7    |
| 3     | 2093.094  | 6.975 | 4.8    |
| 4     | 1986.924  | 6.621 | 10.7   |
| 5     | 1978.974  | 6.595 | 14.6   |
| 6     | 1974.358  | 6.579 | 11.1   |
| 7     | 1972.306  | 6.573 | 12.0   |
| 8     | 1933.839  | 6.444 | 6.7    |
| 9     | 1931.787  | 6.438 | 6.0    |
| 10    | 1925.889  | 6.418 | 5.0    |
| 11    | 1923.837  | 6.411 | 4.7    |
| 12    | 1352.209  | 4.506 | 2.6    |
| 13    | 1345.285  | 4.483 | 3.6    |
| 14    | 1338.618  | 4.461 | 2.7    |
| 15    | 1032.672  | 3.441 | 2.7    |
| 16    | 1025.748  | 3.418 | 5.3    |
| 17    | 1017.798  | 3.392 | 5.9    |
| 18    | 1011.900  | 3.372 | 4.4    |
| 19    | 1007.027  | 3.356 | 64.9   |
| 20    | 995.487   | 3.317 | 144.0  |
| 21    | 953.942   | 3.179 | 57.9   |
| 22    | 810.330   | 2.700 | 5.5    |
| 23    | 802.380   | 2.674 | 7.3    |
| 24    | 795.456   | 2.651 | 4.8    |
| 25    | 748.013   | 2.493 | 14.8   |
| 26    | 746.218   | 2.487 | 31.1   |
| 27    | 744.422   | 2.481 | 41.9   |
| 28    | 742.371   | 2.474 | 30.6   |
| 29    | 740.576   | 2.468 | 14.4   |
| 30    | 427.450   | 1.424 | 45.3   |
| 31    | 420.526   | 1.401 | 44.4   |

# Compound 11d <sup>13</sup>C NMR

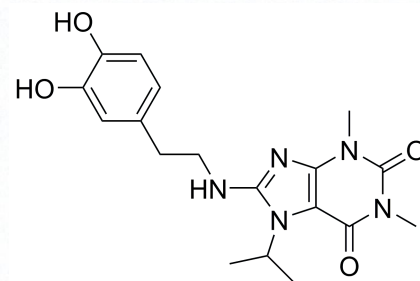

| No. | (ppm)  | (Hz)    | Height |
|-----|--------|---------|--------|
| 1   | 21.55  | 2168.2  | 0.2579 |
| 2   | 28.15  | 2832.9  | 0.1122 |
| 3   | 29.76  | 2995.0  | 0.1402 |
| 4   | 35.13  | 3535.6  | 0.0863 |
| 5   | 39.35  | 3960.4  | 0.1334 |
| 6   | 39.56  | 3980.9  | 0.4286 |
| 7   | 39.77  | 4002.2  | 0.8651 |
| 8   | 39.97  | 4022.8  | 1.0000 |
| 9   | 40.19  | 4044.0  | 0.8754 |
| 10  | 40.40  | 4065.3  | 0.4338 |
| 11  | 40.60  | 4085.8  | 0.1454 |
| 12  | 45.16  | 4544.3  | 0.0832 |
| 13  | 46.52  | 4681.5  | 0.0846 |
| 14  | 49.06  | 4936.8  | 0.0438 |
| 15  | 101.84 | 10248.8 | 0.0639 |
| 16  | 115.90 | 11663.1 | 0.1037 |
| 17  | 116.58 | 11731.4 | 0.1049 |
| 18  | 119.81 | 12056.4 | 0.1058 |
| 19  | 130.63 | 13145.7 | 0.0760 |
| 20  | 143.97 | 14488.2 | 0.0943 |
| 21  | 145.51 | 14643.0 | 0.1236 |
| 22  | 150.19 | 15114.0 | 0.0618 |
| 23  | 151.38 | 15234.3 | 0.0699 |
| 24  | 152.71 | 15367.8 | 0.0722 |
| 25  | 153.21 | 15418.4 | 0.0971 |

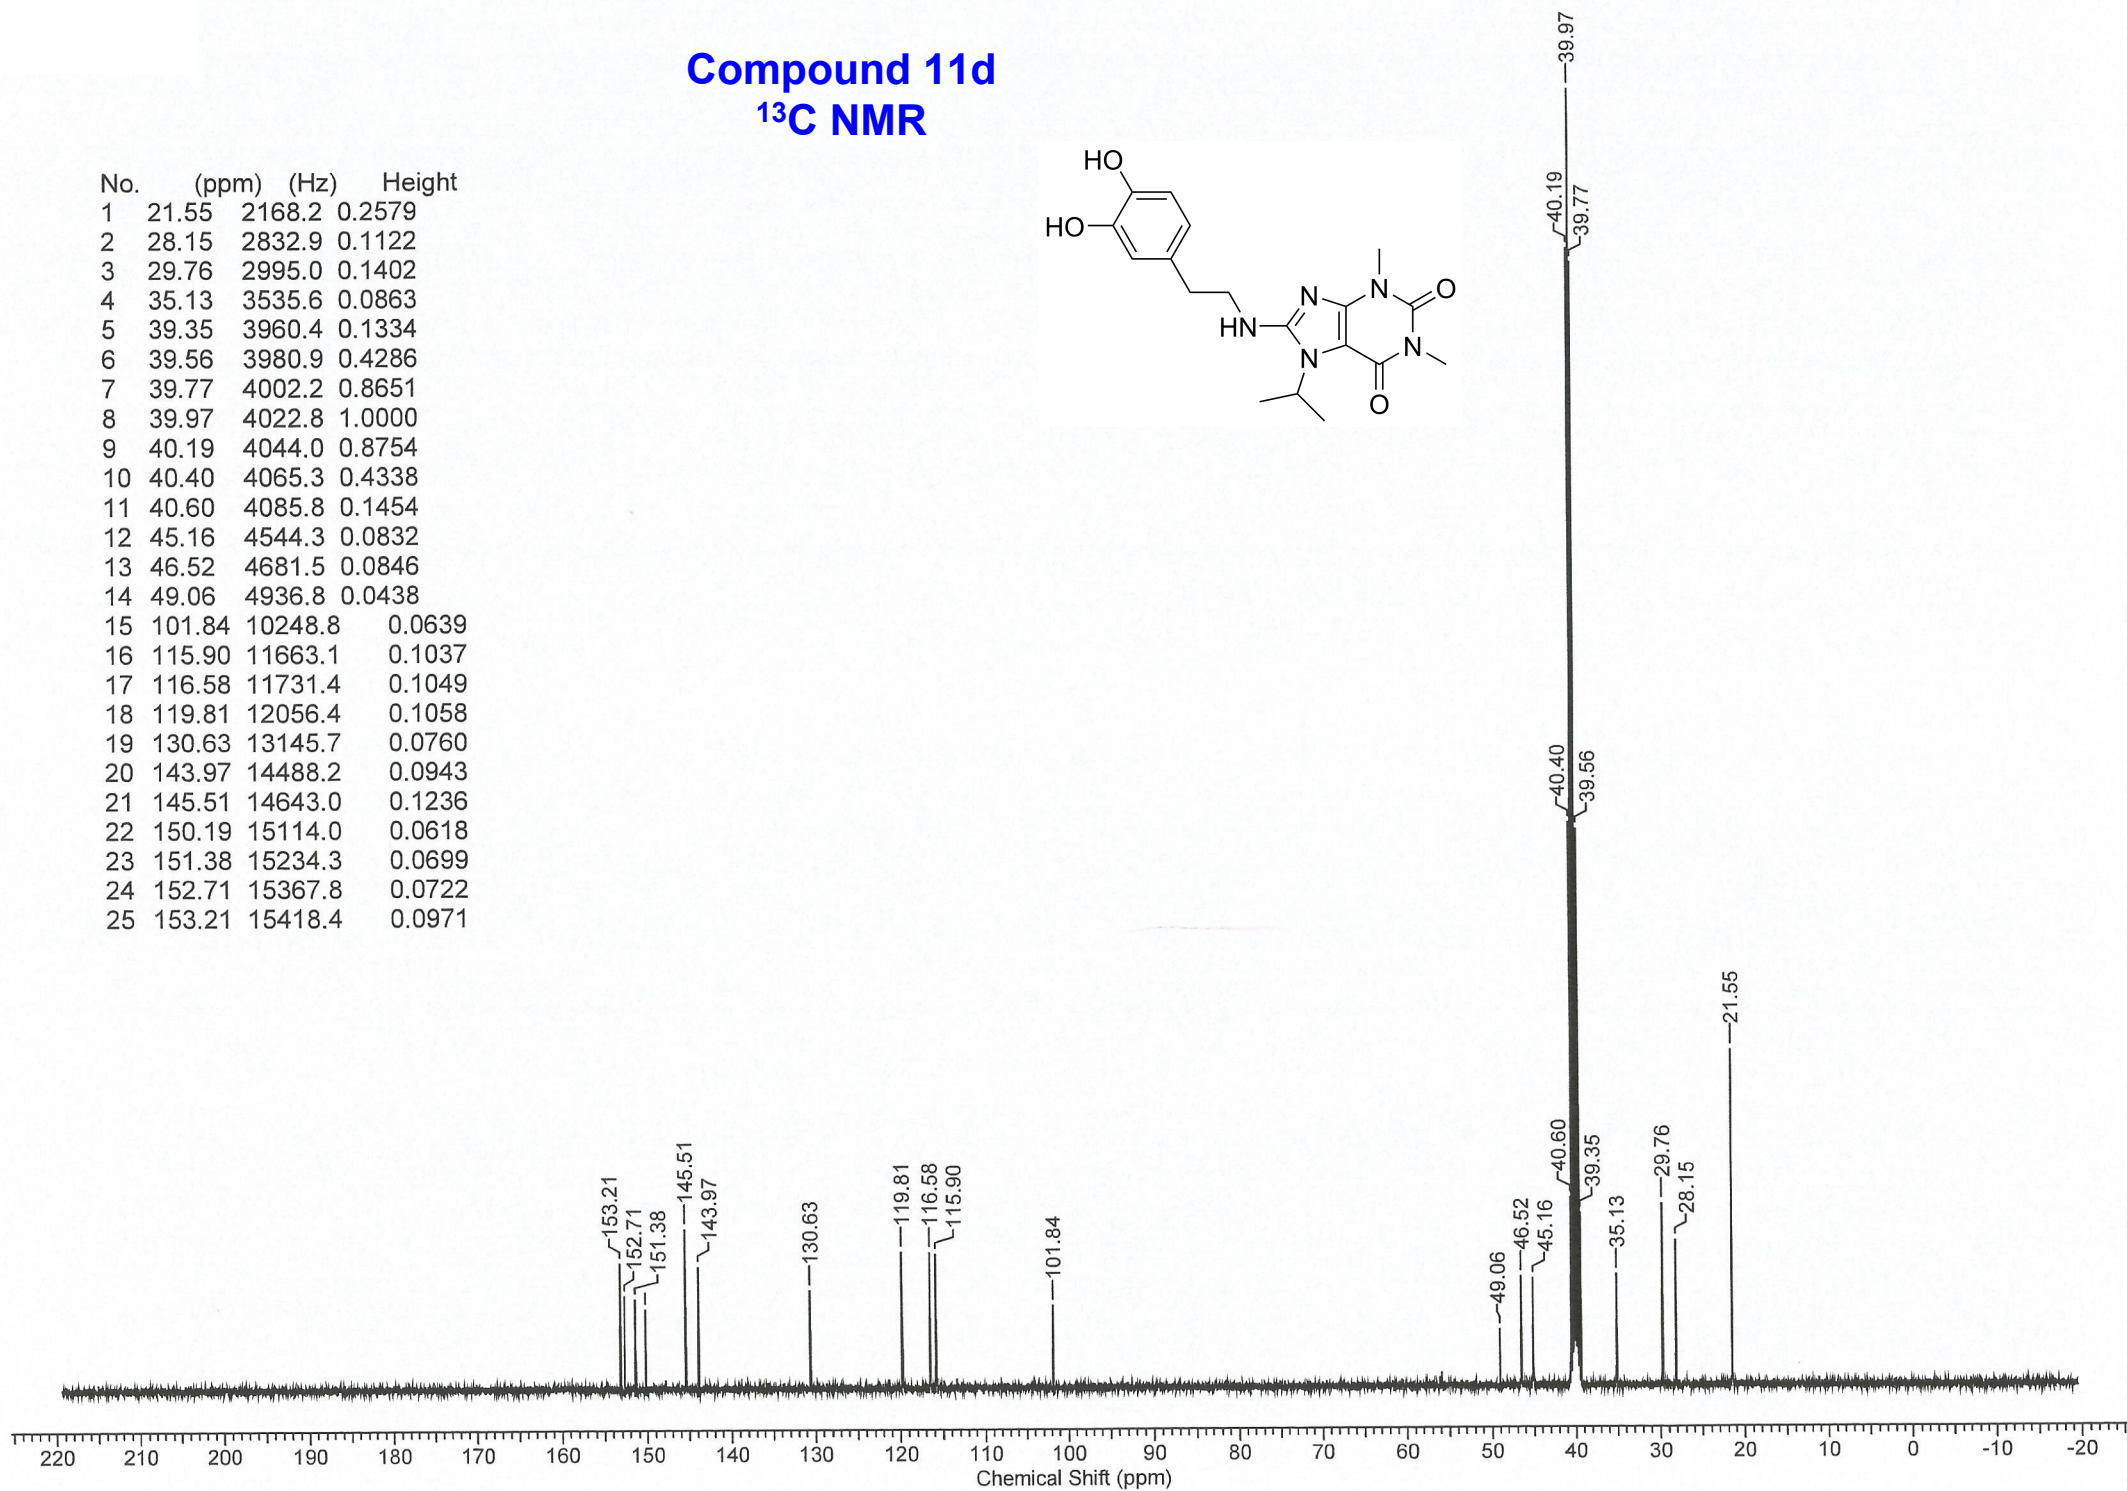

**Compound 11e**  
**<sup>1</sup>H NMR - zoom of the aromatic region**

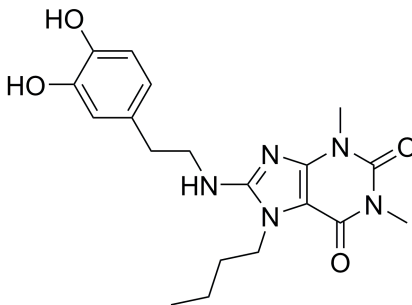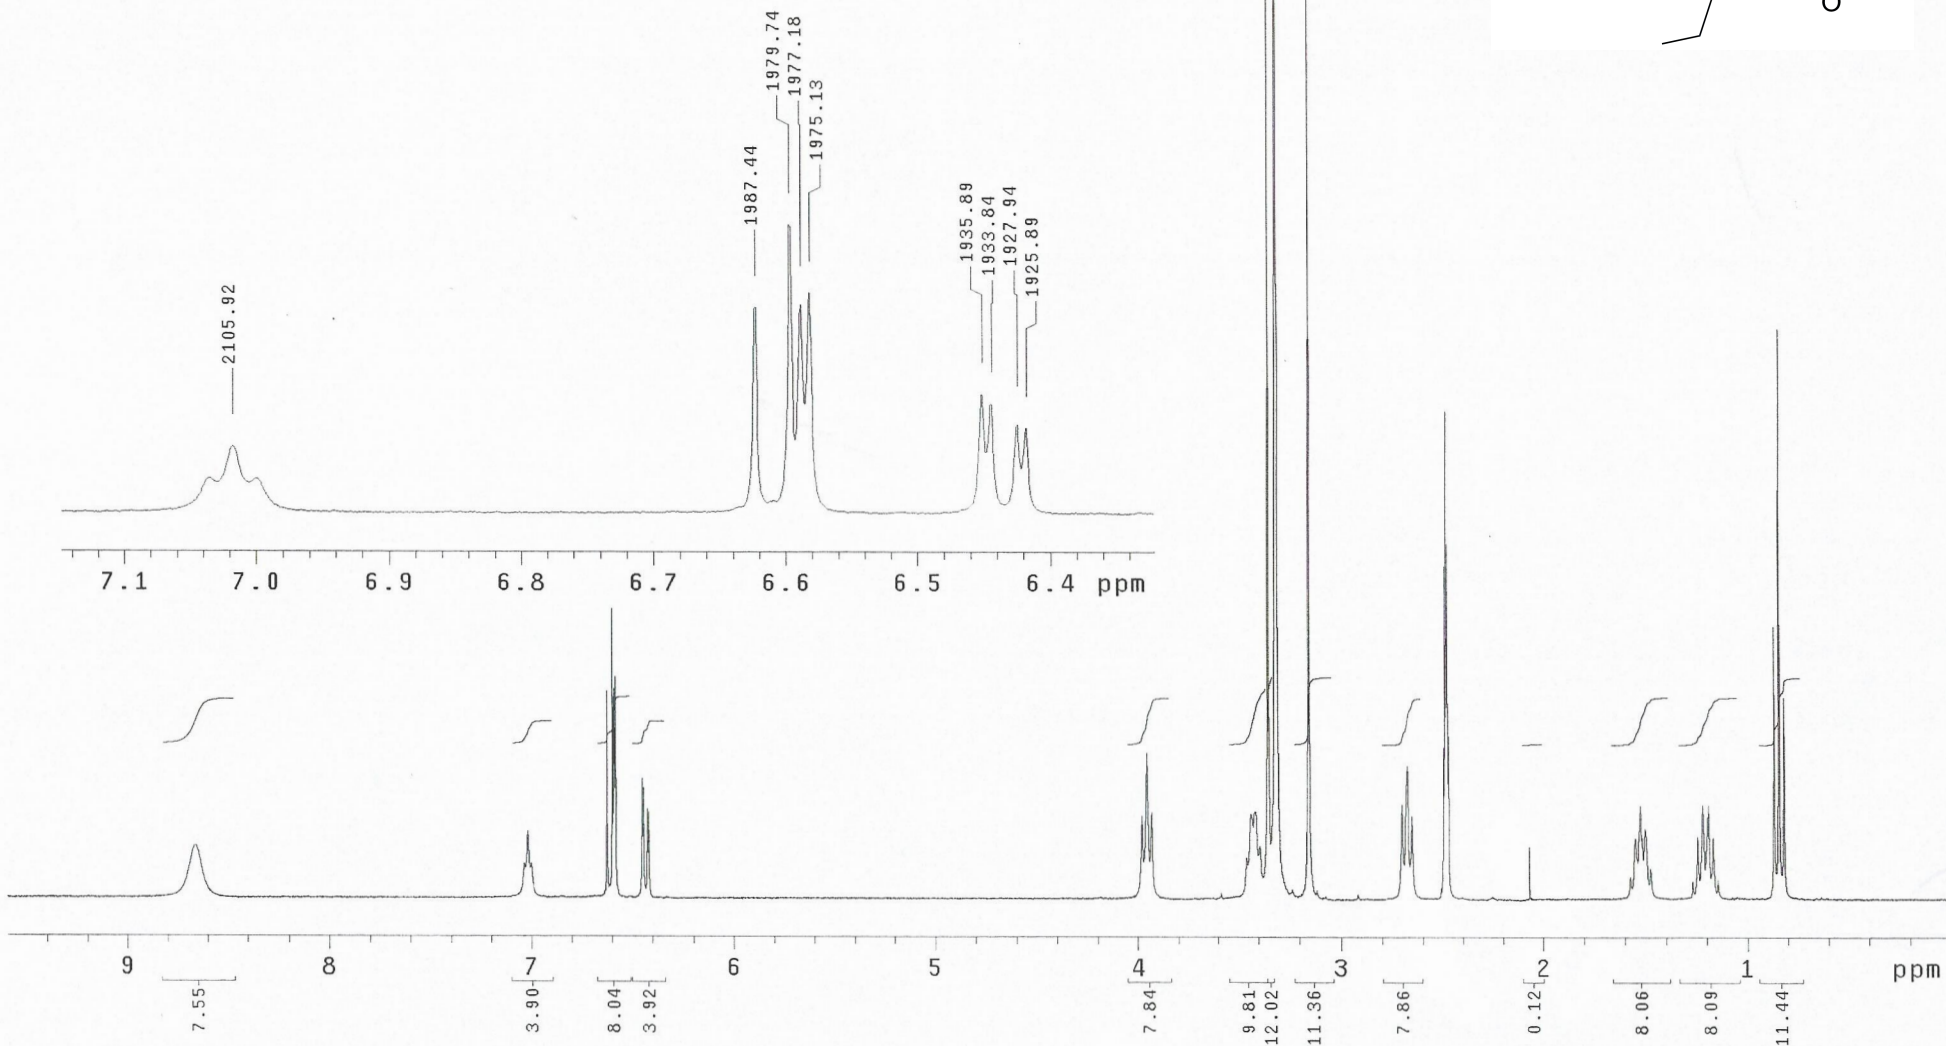

**Compound 11e**  
**<sup>1</sup>H NMR - zoom of the**  
**aliphatic region**

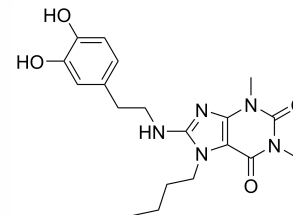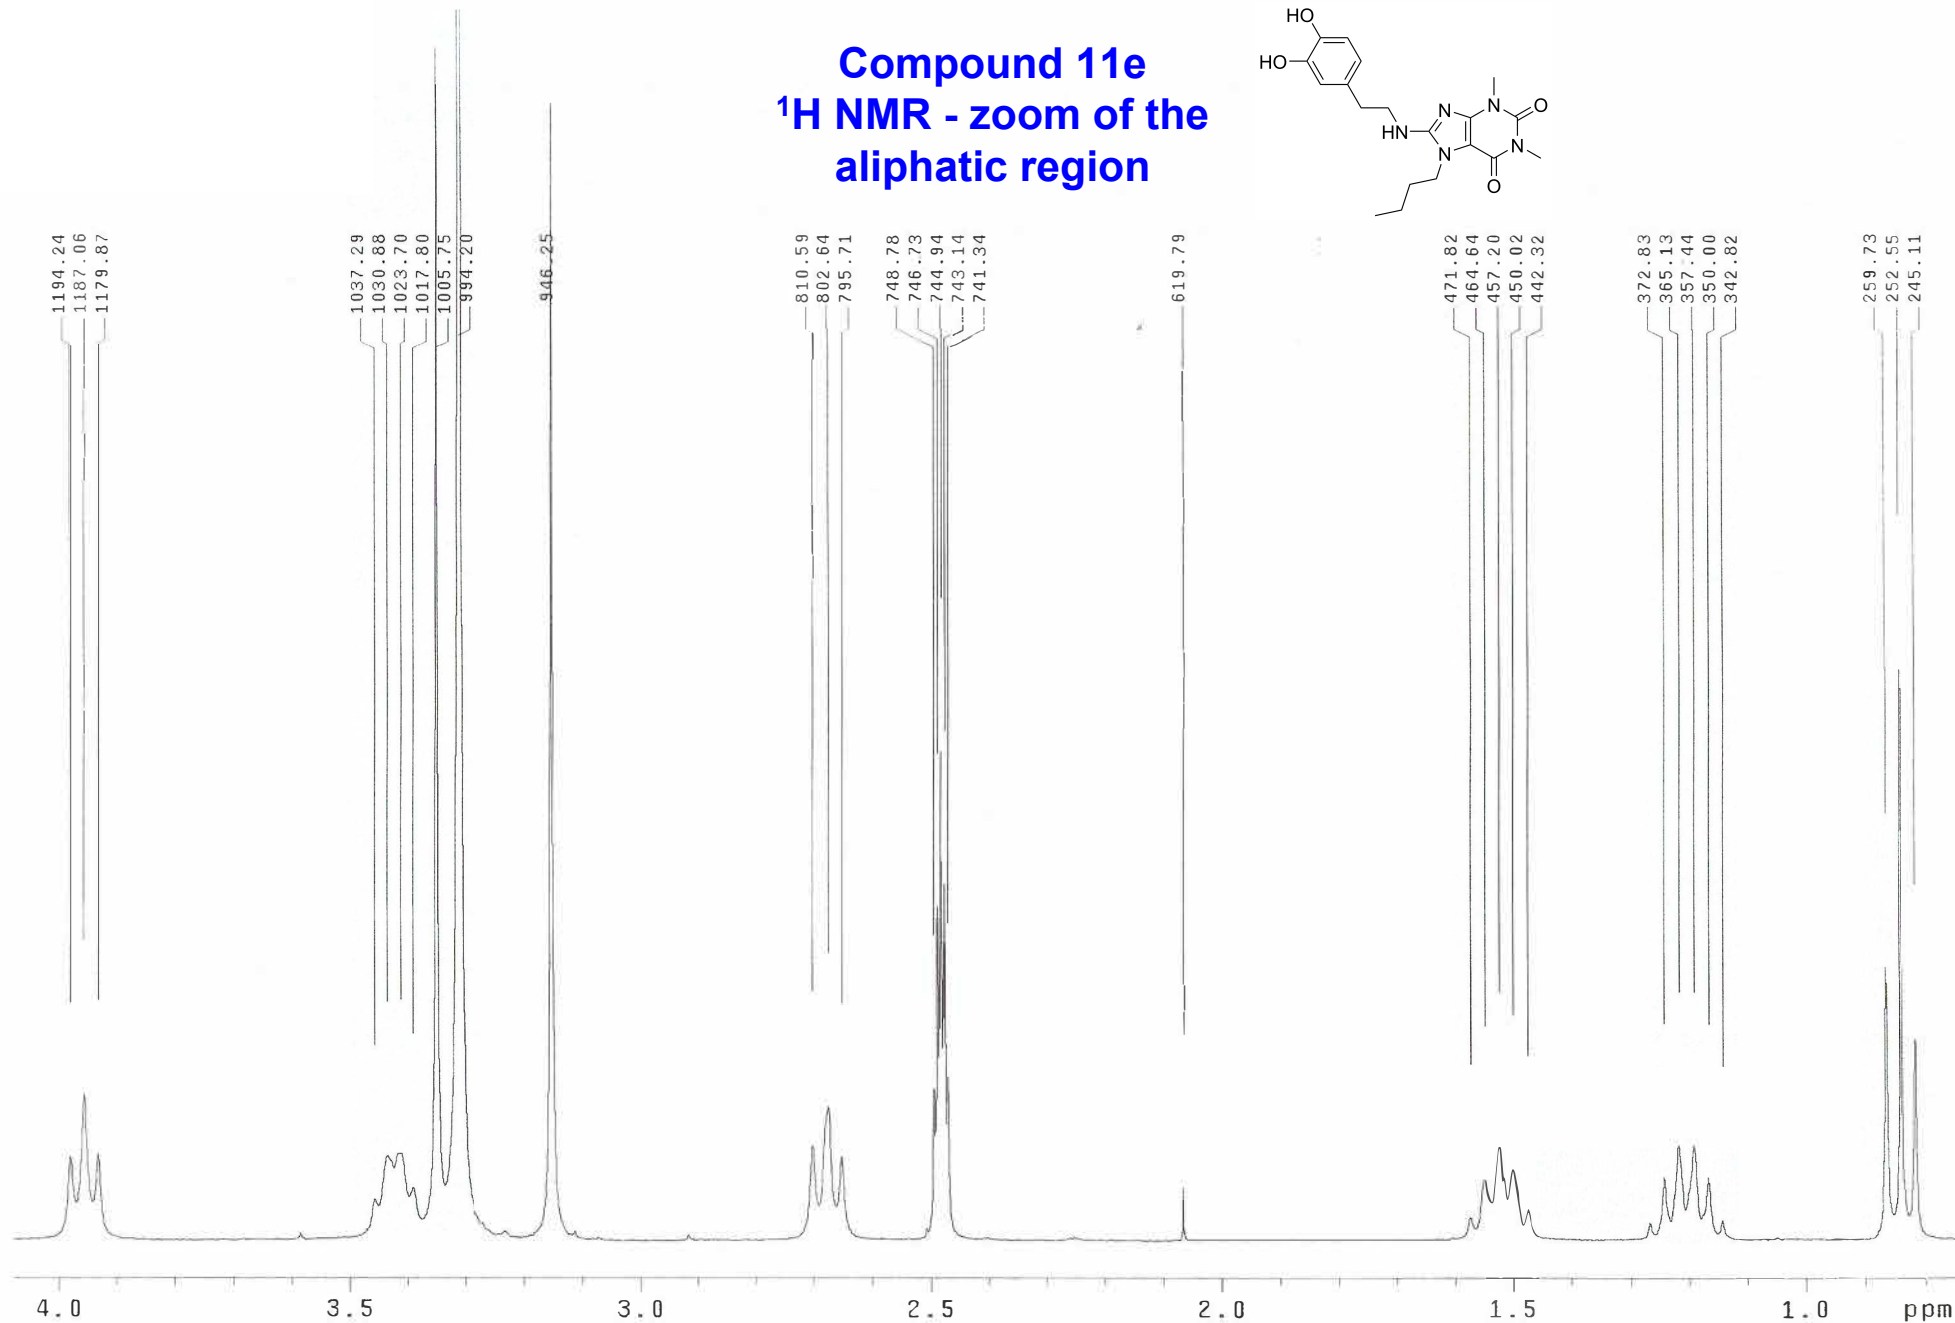

## Table of peaks

| INDEX | FREQUENCY | PPM   | HEIGHT | INDEX | FREQUENCY | PPM   | HEIGHT |
|-------|-----------|-------|--------|-------|-----------|-------|--------|
| 1     | 2600.096  | 8.665 | 6.8    | 40    | 357.439   | 1.191 | 12.2   |
| 2     | 2111.046  | 7.035 | 4.5    | 41    | 350.002   | 1.166 | 8.0    |
| 3     | 2105.917  | 7.018 | 8.7    | 42    | 342.821   | 1.142 | 2.6    |
| 4     | 2100.531  | 7.000 | 4.5    | 43    | 259.731   | 0.866 | 35.4   |
| 5     | 1987.437  | 6.623 | 26.8   | 44    | 252.551   | 0.842 | 74.0   |
| 6     | 1979.743  | 6.597 | 37.5   | 45    | 245.114   | 0.817 | 26.1   |
| 7     | 1977.179  | 6.589 | 27.2   |       |           |       |        |
| 8     | 1975.127  | 6.582 | 28.7   |       |           |       |        |
| 9     | 1935.890  | 6.451 | 15.5   |       |           |       |        |
| 10    | 1933.839  | 6.444 | 14.3   |       |           |       |        |
| 11    | 1927.940  | 6.425 | 11.6   |       |           |       |        |
| 12    | 1925.889  | 6.418 | 11.1   |       |           |       |        |
| 13    | 1194.236  | 3.980 | 10.8   |       |           |       |        |
| 14    | 1187.056  | 3.956 | 18.9   |       |           |       |        |
| 15    | 1179.875  | 3.932 | 11.1   |       |           |       |        |
| 16    | 1037.289  | 3.457 | 5.3    |       |           |       |        |
| 17    | 1030.877  | 3.435 | 11.0   |       |           |       |        |
| 18    | 1023.697  | 3.411 | 11.3   |       |           |       |        |
| 19    | 1017.798  | 3.392 | 6.8    |       |           |       |        |
| 20    | 1005.745  | 3.352 | 154.7  |       |           |       |        |
| 21    | 994.205   | 3.313 | 269.8  |       |           |       |        |
| 22    | 946.249   | 3.153 | 147.3  |       |           |       |        |
| 23    | 810.587   | 2.701 | 12.3   |       |           |       |        |
| 24    | 802.637   | 2.675 | 17.2   |       |           |       |        |
| 25    | 795.712   | 2.652 | 10.7   |       |           |       |        |
| 26    | 748.782   | 2.495 | 19.6   |       |           |       |        |
| 27    | 746.730   | 2.488 | 43.3   |       |           |       |        |
| 28    | 744.935   | 2.482 | 63.4   |       |           |       |        |
| 29    | 743.140   | 2.476 | 46.1   |       |           |       |        |
| 30    | 741.345   | 2.470 | 21.1   |       |           |       |        |
| 31    | 619.788   | 2.065 | 6.7    |       |           |       |        |
| 32    | 471.816   | 1.572 | 2.9    |       |           |       |        |
| 33    | 464.635   | 1.548 | 7.9    |       |           |       |        |
| 34    | 457.198   | 1.524 | 12.1   |       |           |       |        |
| 35    | 454.634   | 1.515 | 8.0    |       |           |       |        |
| 36    | 450.018   | 1.500 | 9.1    |       |           |       |        |
| 37    | 442.324   | 1.474 | 3.9    |       |           |       |        |
| 38    | 372.826   | 1.242 | 8.2    |       |           |       |        |
| 39    | 365.132   | 1.217 | 12.2   |       |           |       |        |

# Compound 11e <sup>13</sup>C NMR

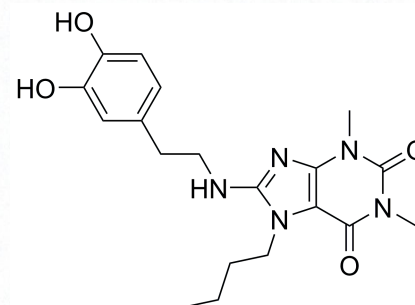

| No. | (ppm)  | (Hz)    | Height |
|-----|--------|---------|--------|
| 1   | 14.11  | 1420.0  | 0.1391 |
| 2   | 19.55  | 1967.2  | 0.1197 |
| 3   | 27.65  | 2783.0  | 0.0943 |
| 4   | 29.71  | 2989.8  | 0.1029 |
| 5   | 31.66  | 3185.7  | 0.0846 |
| 6   | 35.19  | 3540.8  | 0.0680 |
| 7   | 39.36  | 3961.1  | 0.1359 |
| 8   | 39.57  | 3982.4  | 0.4220 |
| 9   | 39.78  | 4002.9  | 0.8329 |
| 10  | 39.99  | 4024.2  | 1.0000 |
| 11  | 40.20  | 4045.5  | 0.8336 |
| 12  | 40.40  | 4066.0  | 0.4215 |
| 13  | 40.62  | 4087.3  | 0.1387 |
| 14  | 42.62  | 4289.0  | 0.0514 |
| 15  | 44.87  | 4515.7  | 0.0670 |
| 16  | 101.84 | 10248.8 | 0.0691 |
| 17  | 115.88 | 11660.9 | 0.0856 |
| 18  | 116.55 | 11729.2 | 0.0915 |
| 19  | 119.81 | 12056.4 | 0.0889 |
| 20  | 130.57 | 13139.9 | 0.0779 |
| 21  | 143.99 | 14490.4 | 0.0868 |
| 22  | 145.52 | 14644.5 | 0.0950 |
| 23  | 149.04 | 14998.8 | 0.0479 |
| 24  | 151.45 | 15240.9 | 0.0630 |
| 25  | 153.04 | 15400.8 | 0.0636 |
| 26  | 153.71 | 15468.3 | 0.0838 |

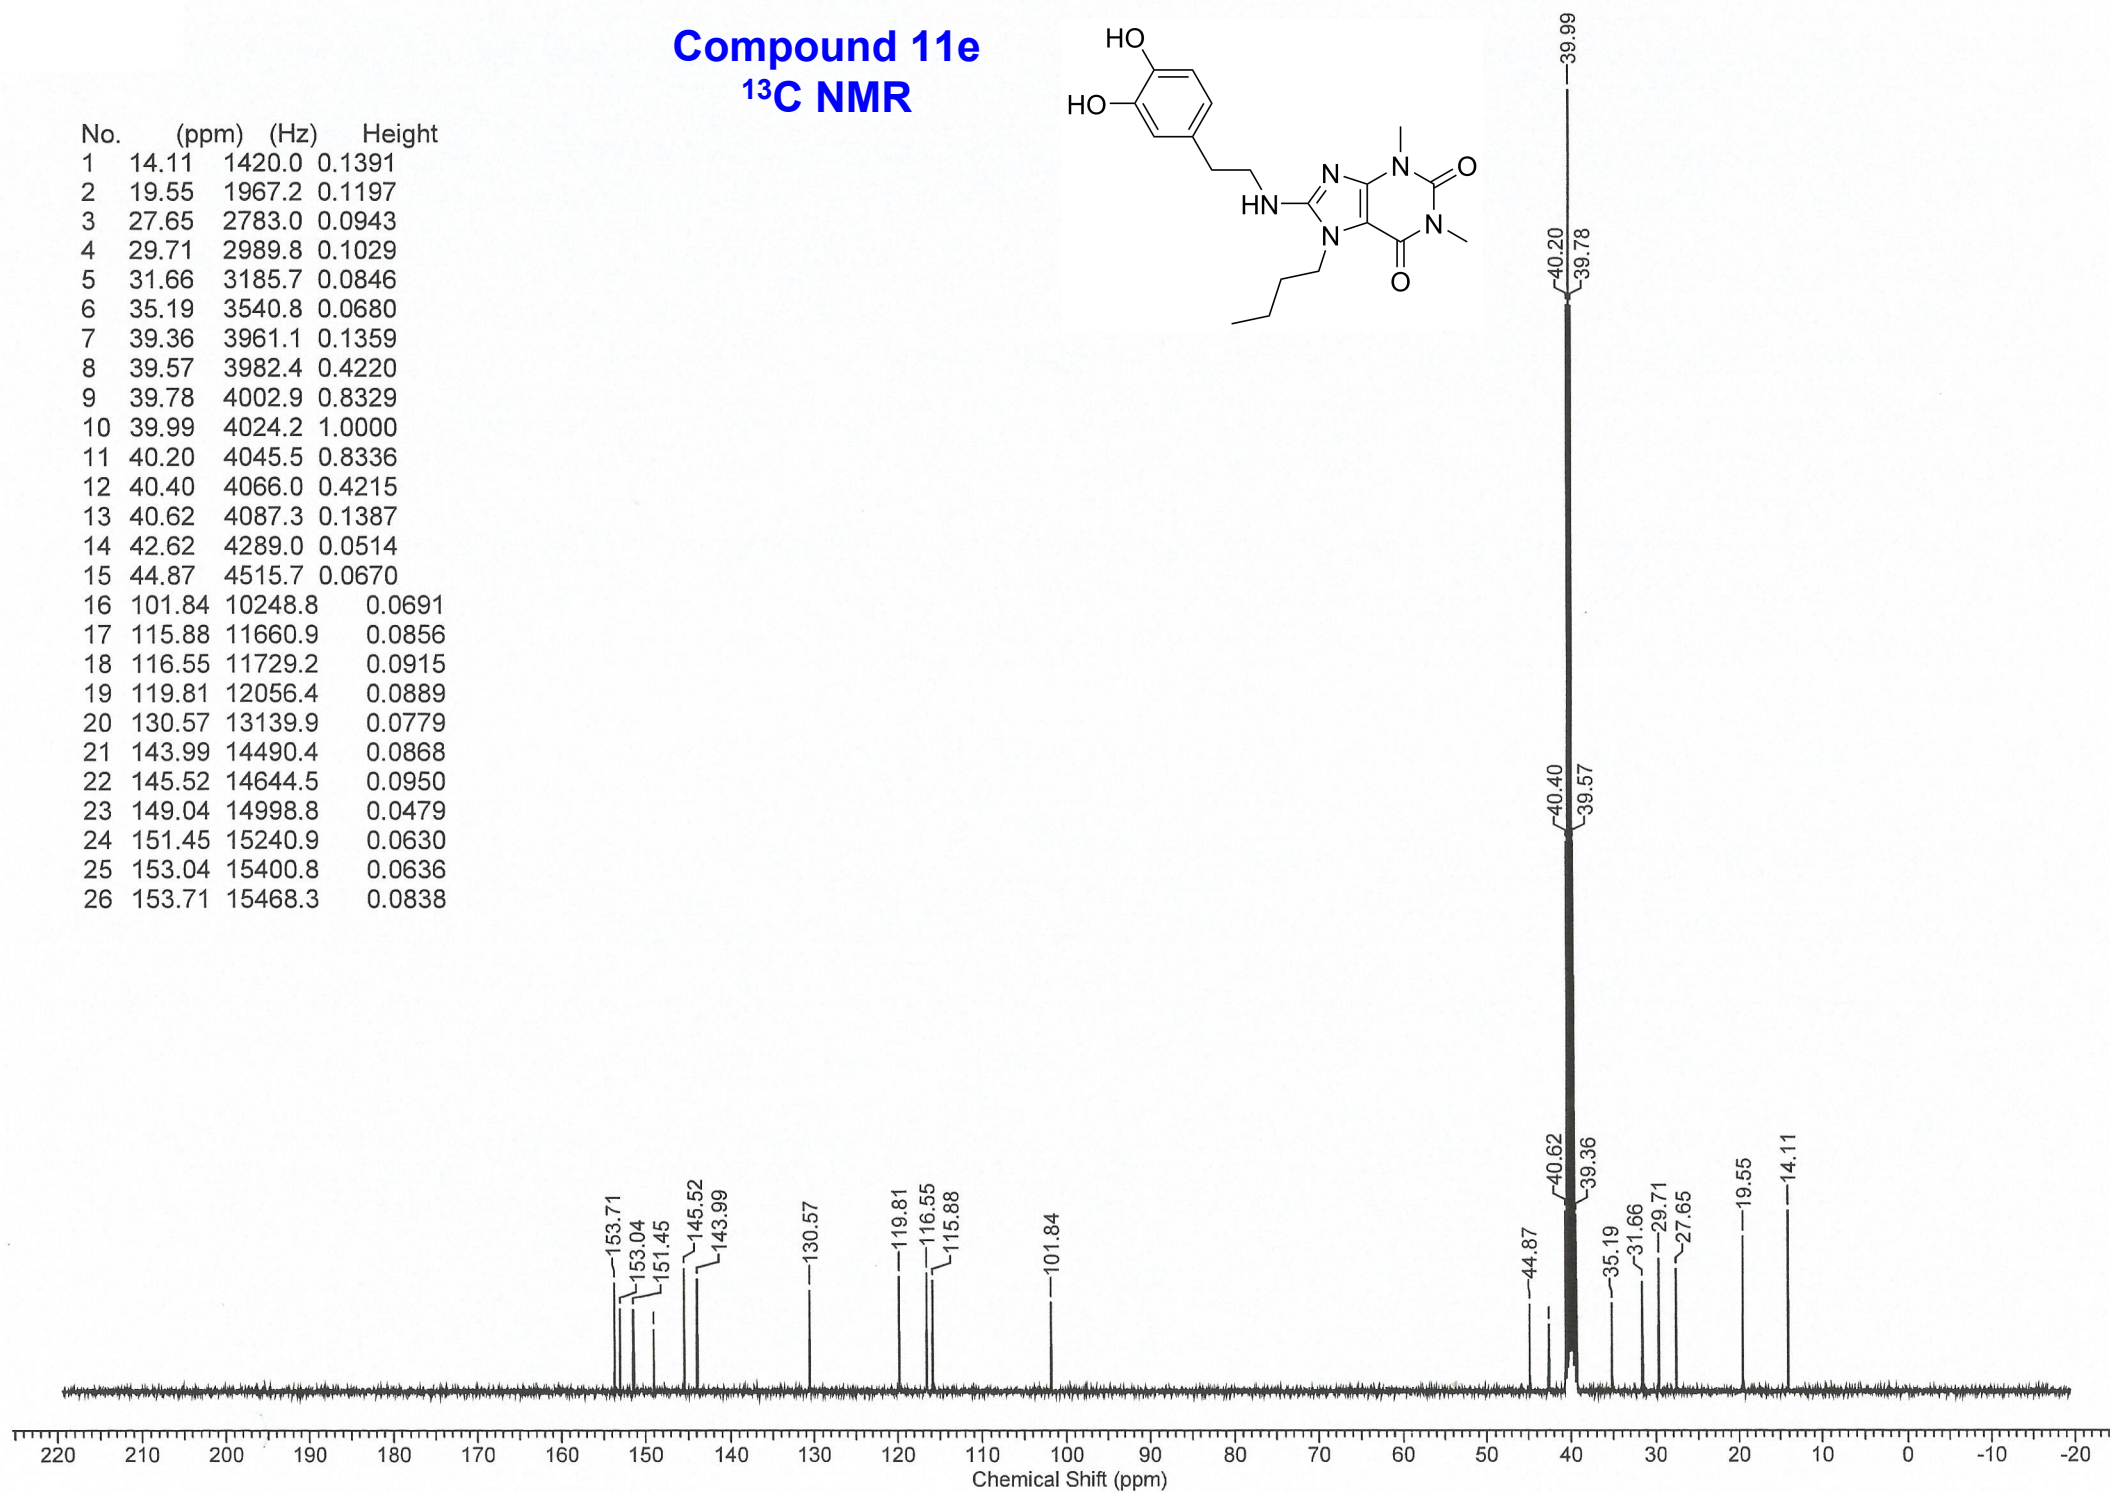

7-bromo-2,4-dimethyl-6-(4-hydroxyphenyl)-1,2,3,4-tetrahydropyrimidin-5(1H)-one

**Compound 11f**  
 **$^1\text{H}$  NMR - zoom of the aromatic region**

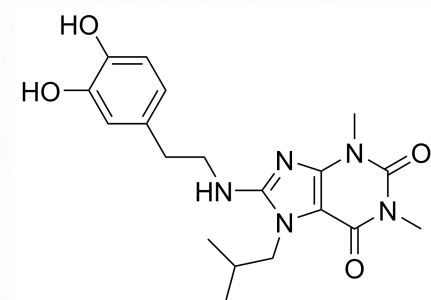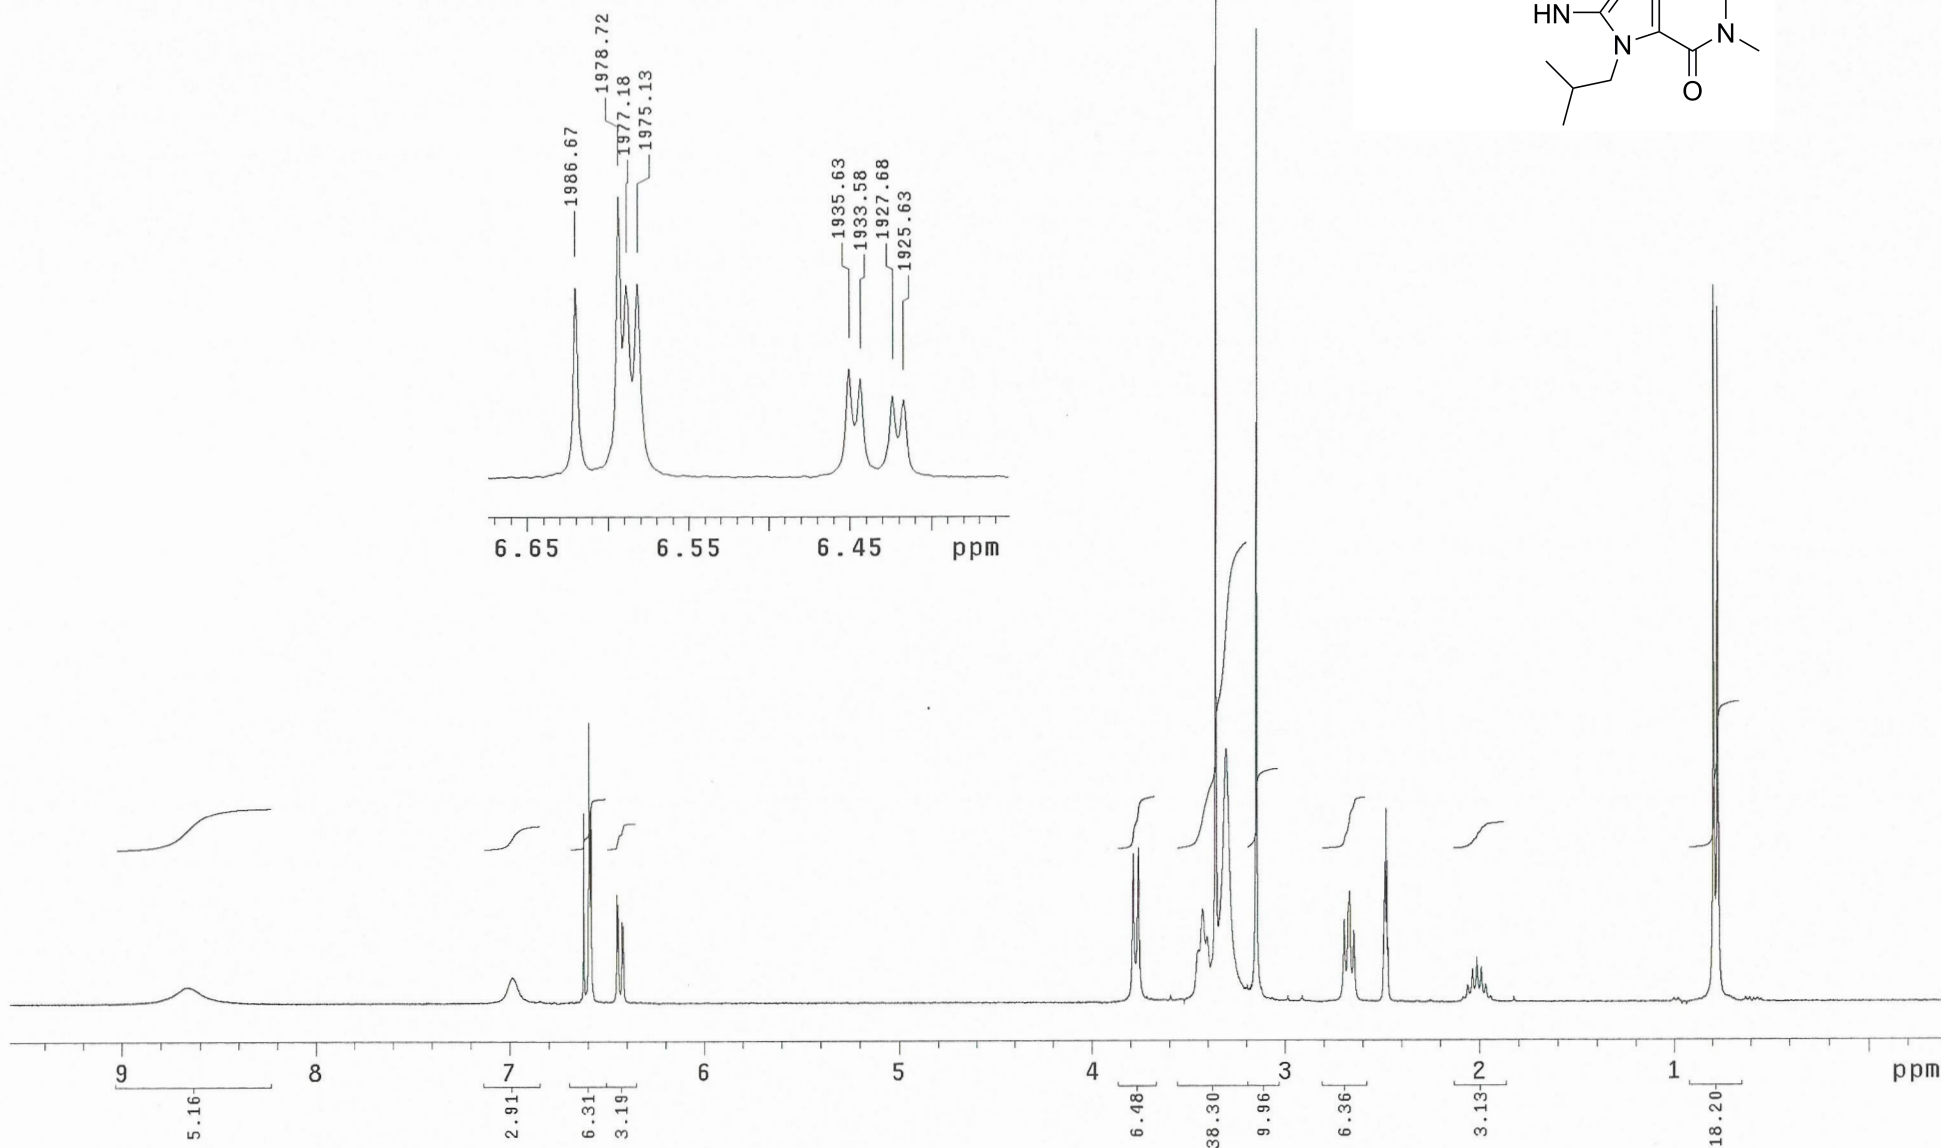

**Compound 11f**  
**<sup>1</sup>H NMR - zoom of the**  
**aliphatic region**

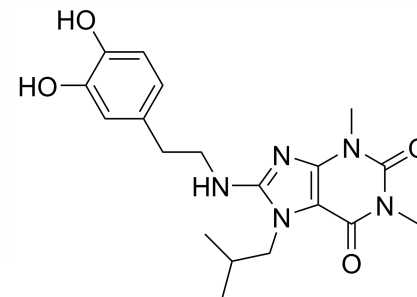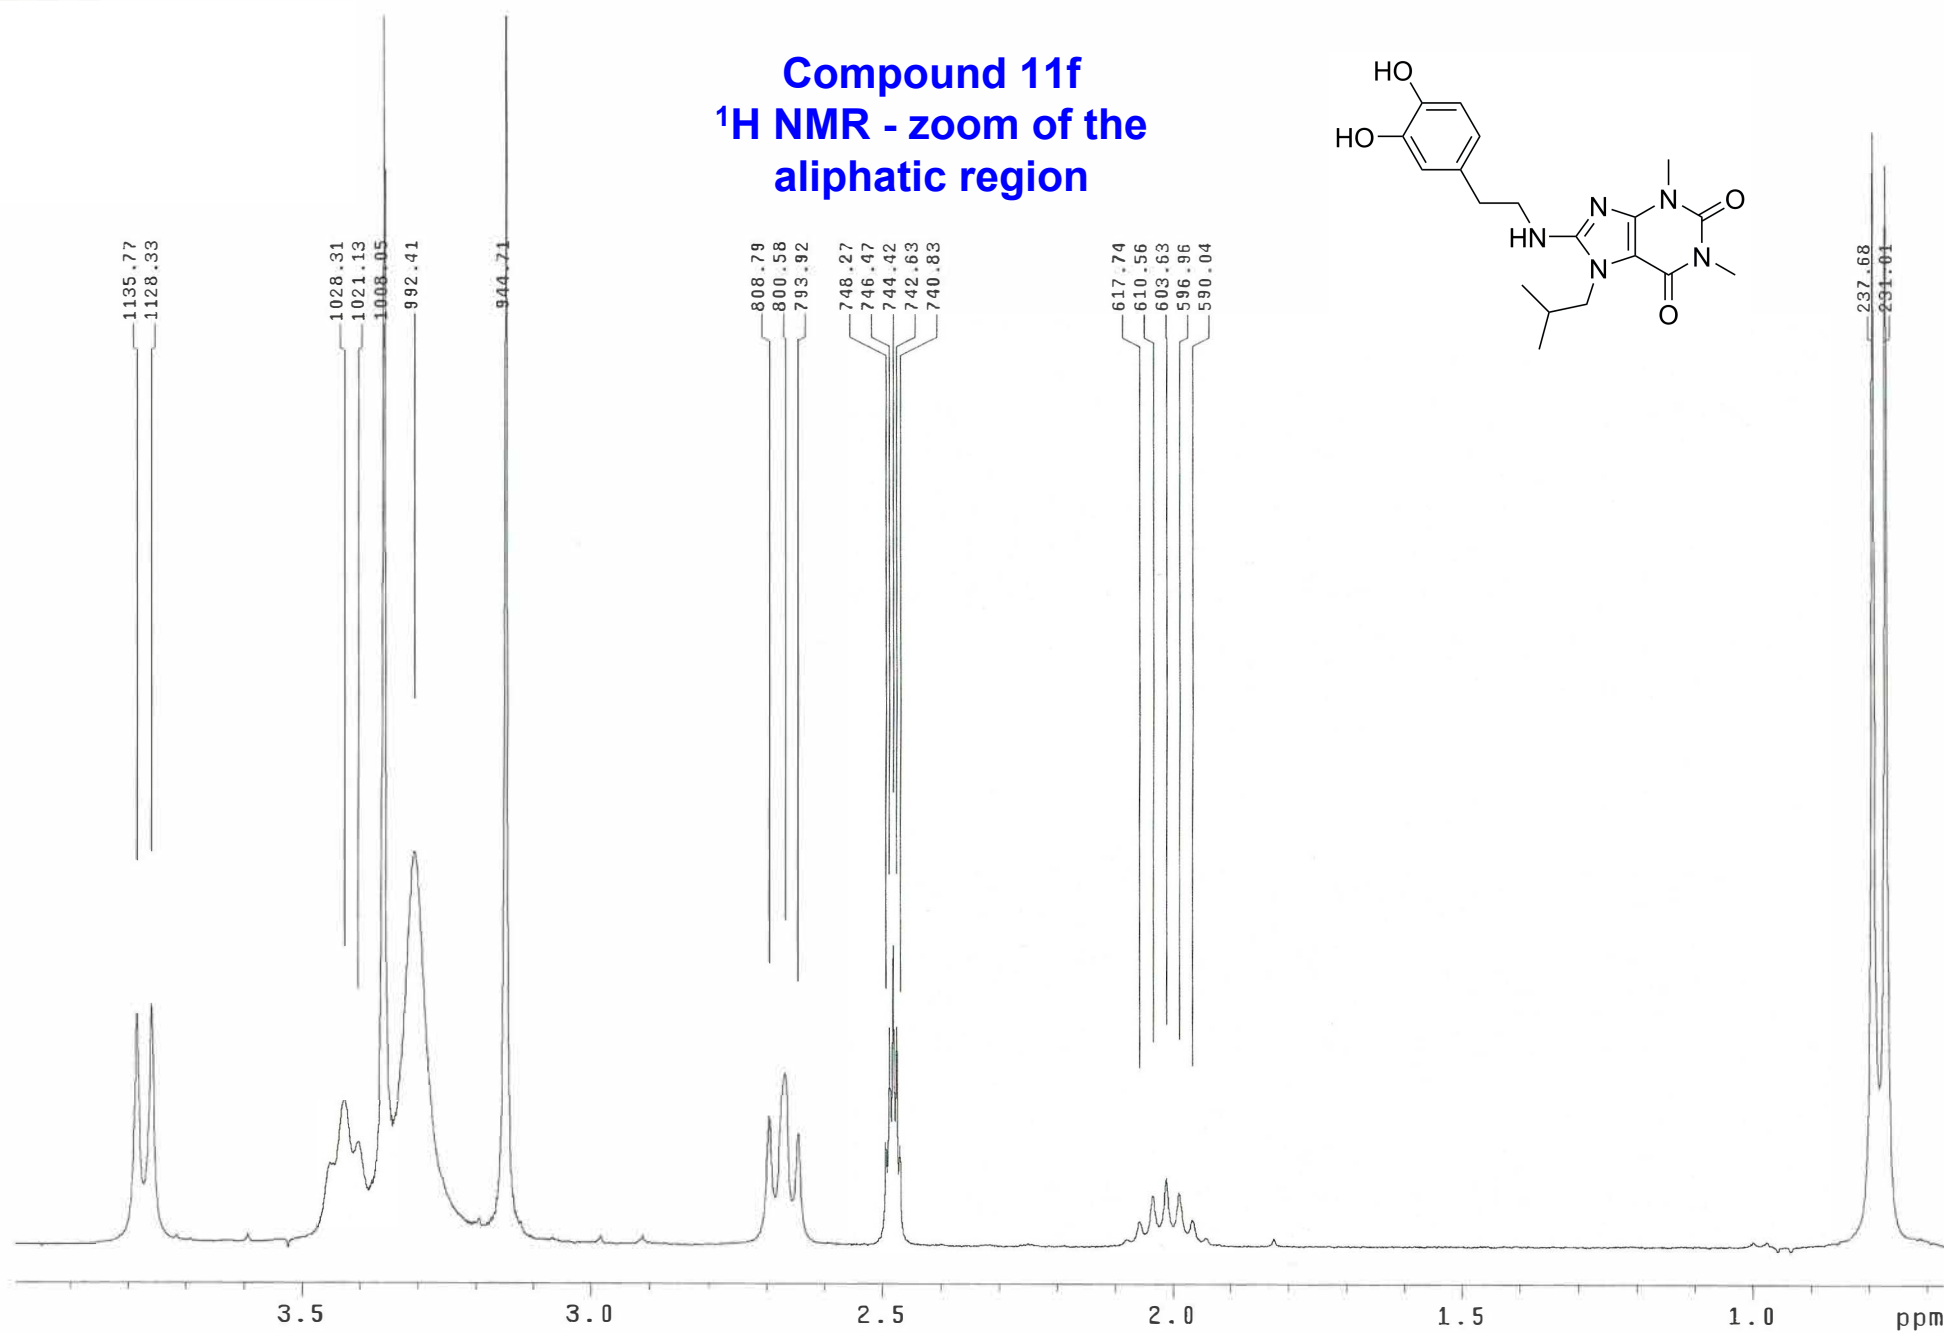

## Table of peaks

| INDEX | FREQUENCY | PPM   | HEIGHT | INDEX | FREQUENCY | PPM   | HEIGHT |
|-------|-----------|-------|--------|-------|-----------|-------|--------|
| 1     | 2095.659  | 6.984 | 3.3    | 40    | 237.677   | 0.792 | 93.1   |
| 2     | 1986.667  | 6.620 | 24.7   | 41    | 231.009   | 0.770 | 90.4   |
| 3     | 1978.717  | 6.594 | 36.5   |       |           |       |        |
| 4     | 1977.179  | 6.589 | 25.1   |       |           |       |        |
| 5     | 1975.127  | 6.582 | 25.3   |       |           |       |        |
| 6     | 1935.634  | 6.450 | 14.2   |       |           |       |        |
| 7     | 1933.582  | 6.444 | 12.8   |       |           |       |        |
| 8     | 1927.684  | 6.424 | 10.6   |       |           |       |        |
| 9     | 1925.632  | 6.417 | 10.0   |       |           |       |        |
| 10    | 1135.765  | 3.785 | 19.3   |       |           |       |        |
| 11    | 1128.328  | 3.760 | 20.1   |       |           |       |        |
| 12    | 1035.750  | 3.452 | 6.9    |       |           |       |        |
| 13    | 1028.313  | 3.427 | 12.1   |       |           |       |        |
| 14    | 1021.132  | 3.403 | 8.5    |       |           |       |        |
| 15    | 1016.260  | 3.387 | 4.8    |       |           |       |        |
| 16    | 1015.747  | 3.385 | 4.8    |       |           |       |        |
| 17    | 1015.234  | 3.383 | 5.0    |       |           |       |        |
| 18    | 1014.208  | 3.380 | 5.4    |       |           |       |        |
| 19    | 1013.695  | 3.378 | 5.5    |       |           |       |        |
| 20    | 1008.053  | 3.359 | 144.0  |       |           |       |        |
| 21    | 1004.463  | 3.347 | 10.7   |       |           |       |        |
| 22    | 1003.950  | 3.346 | 10.4   |       |           |       |        |
| 23    | 1003.437  | 3.344 | 10.4   |       |           |       |        |
| 24    | 1002.924  | 3.342 | 10.7   |       |           |       |        |
| 25    | 1002.411  | 3.340 | 11.0   |       |           |       |        |
| 26    | 991.897   | 3.305 | 32.9   |       |           |       |        |
| 27    | 992.410   | 3.307 | 32.9   |       |           |       |        |
| 28    | 944.710   | 3.148 | 126.4  |       |           |       |        |
| 29    | 808.791   | 2.695 | 10.8   |       |           |       |        |
| 30    | 800.585   | 2.668 | 14.4   |       |           |       |        |
| 31    | 793.917   | 2.646 | 9.3    |       |           |       |        |
| 32    | 748.269   | 2.494 | 8.7    |       |           |       |        |
| 33    | 746.474   | 2.488 | 18.2   |       |           |       |        |
| 34    | 744.422   | 2.481 | 25.1   |       |           |       |        |
| 35    | 742.627   | 2.475 | 18.3   |       |           |       |        |
| 36    | 740.832   | 2.469 | 8.4    |       |           |       |        |
| 37    | 610.555   | 2.035 | 4.3    |       |           |       |        |
| 38    | 603.631   | 2.012 | 5.7    |       |           |       |        |
| 39    | 596.964   | 1.989 | 4.5    |       |           |       |        |

# Compound 11f <sup>13</sup>C NMR

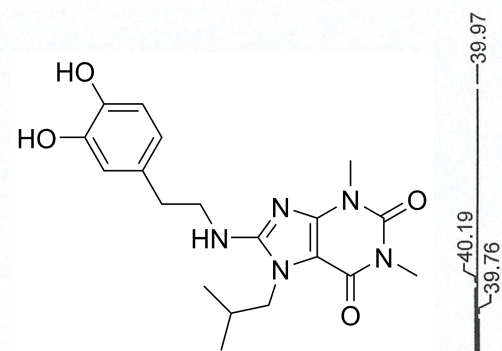

| No. | (ppm)  | (Hz)    | Height |
|-----|--------|---------|--------|
| 1   | 19.64  | 1976.0  | 0.2262 |
| 2   | 27.65  | 2783.0  | 0.1002 |
| 3   | 28.60  | 2877.6  | 0.0823 |
| 4   | 29.73  | 2991.3  | 0.1096 |
| 5   | 35.27  | 3549.6  | 0.0699 |
| 6   | 39.35  | 3959.7  | 0.1374 |
| 7   | 39.56  | 3980.9  | 0.4236 |
| 8   | 39.76  | 4001.5  | 0.8214 |
| 9   | 39.97  | 4022.8  | 1.0000 |
| 10  | 40.19  | 4044.0  | 0.8454 |
| 11  | 40.39  | 4064.6  | 0.4219 |
| 12  | 40.60  | 4085.8  | 0.1387 |
| 13  | 44.93  | 4521.6  | 0.0693 |
| 14  | 49.39  | 4969.8  | 0.0496 |
| 15  | 102.18 | 10282.5 | 0.0651 |
| 16  | 115.88 | 11661.7 | 0.0835 |
| 17  | 116.54 | 11727.7 | 0.0914 |
| 18  | 119.78 | 12054.2 | 0.0820 |
| 19  | 130.54 | 13136.2 | 0.0753 |
| 20  | 143.99 | 14490.4 | 0.0676 |
| 21  | 145.52 | 14644.5 | 0.0985 |
| 22  | 148.98 | 14992.2 | 0.0573 |
| 23  | 151.44 | 15240.2 | 0.0572 |
| 24  | 153.00 | 15397.1 | 0.0488 |
| 25  | 153.98 | 15495.5 | 0.0762 |

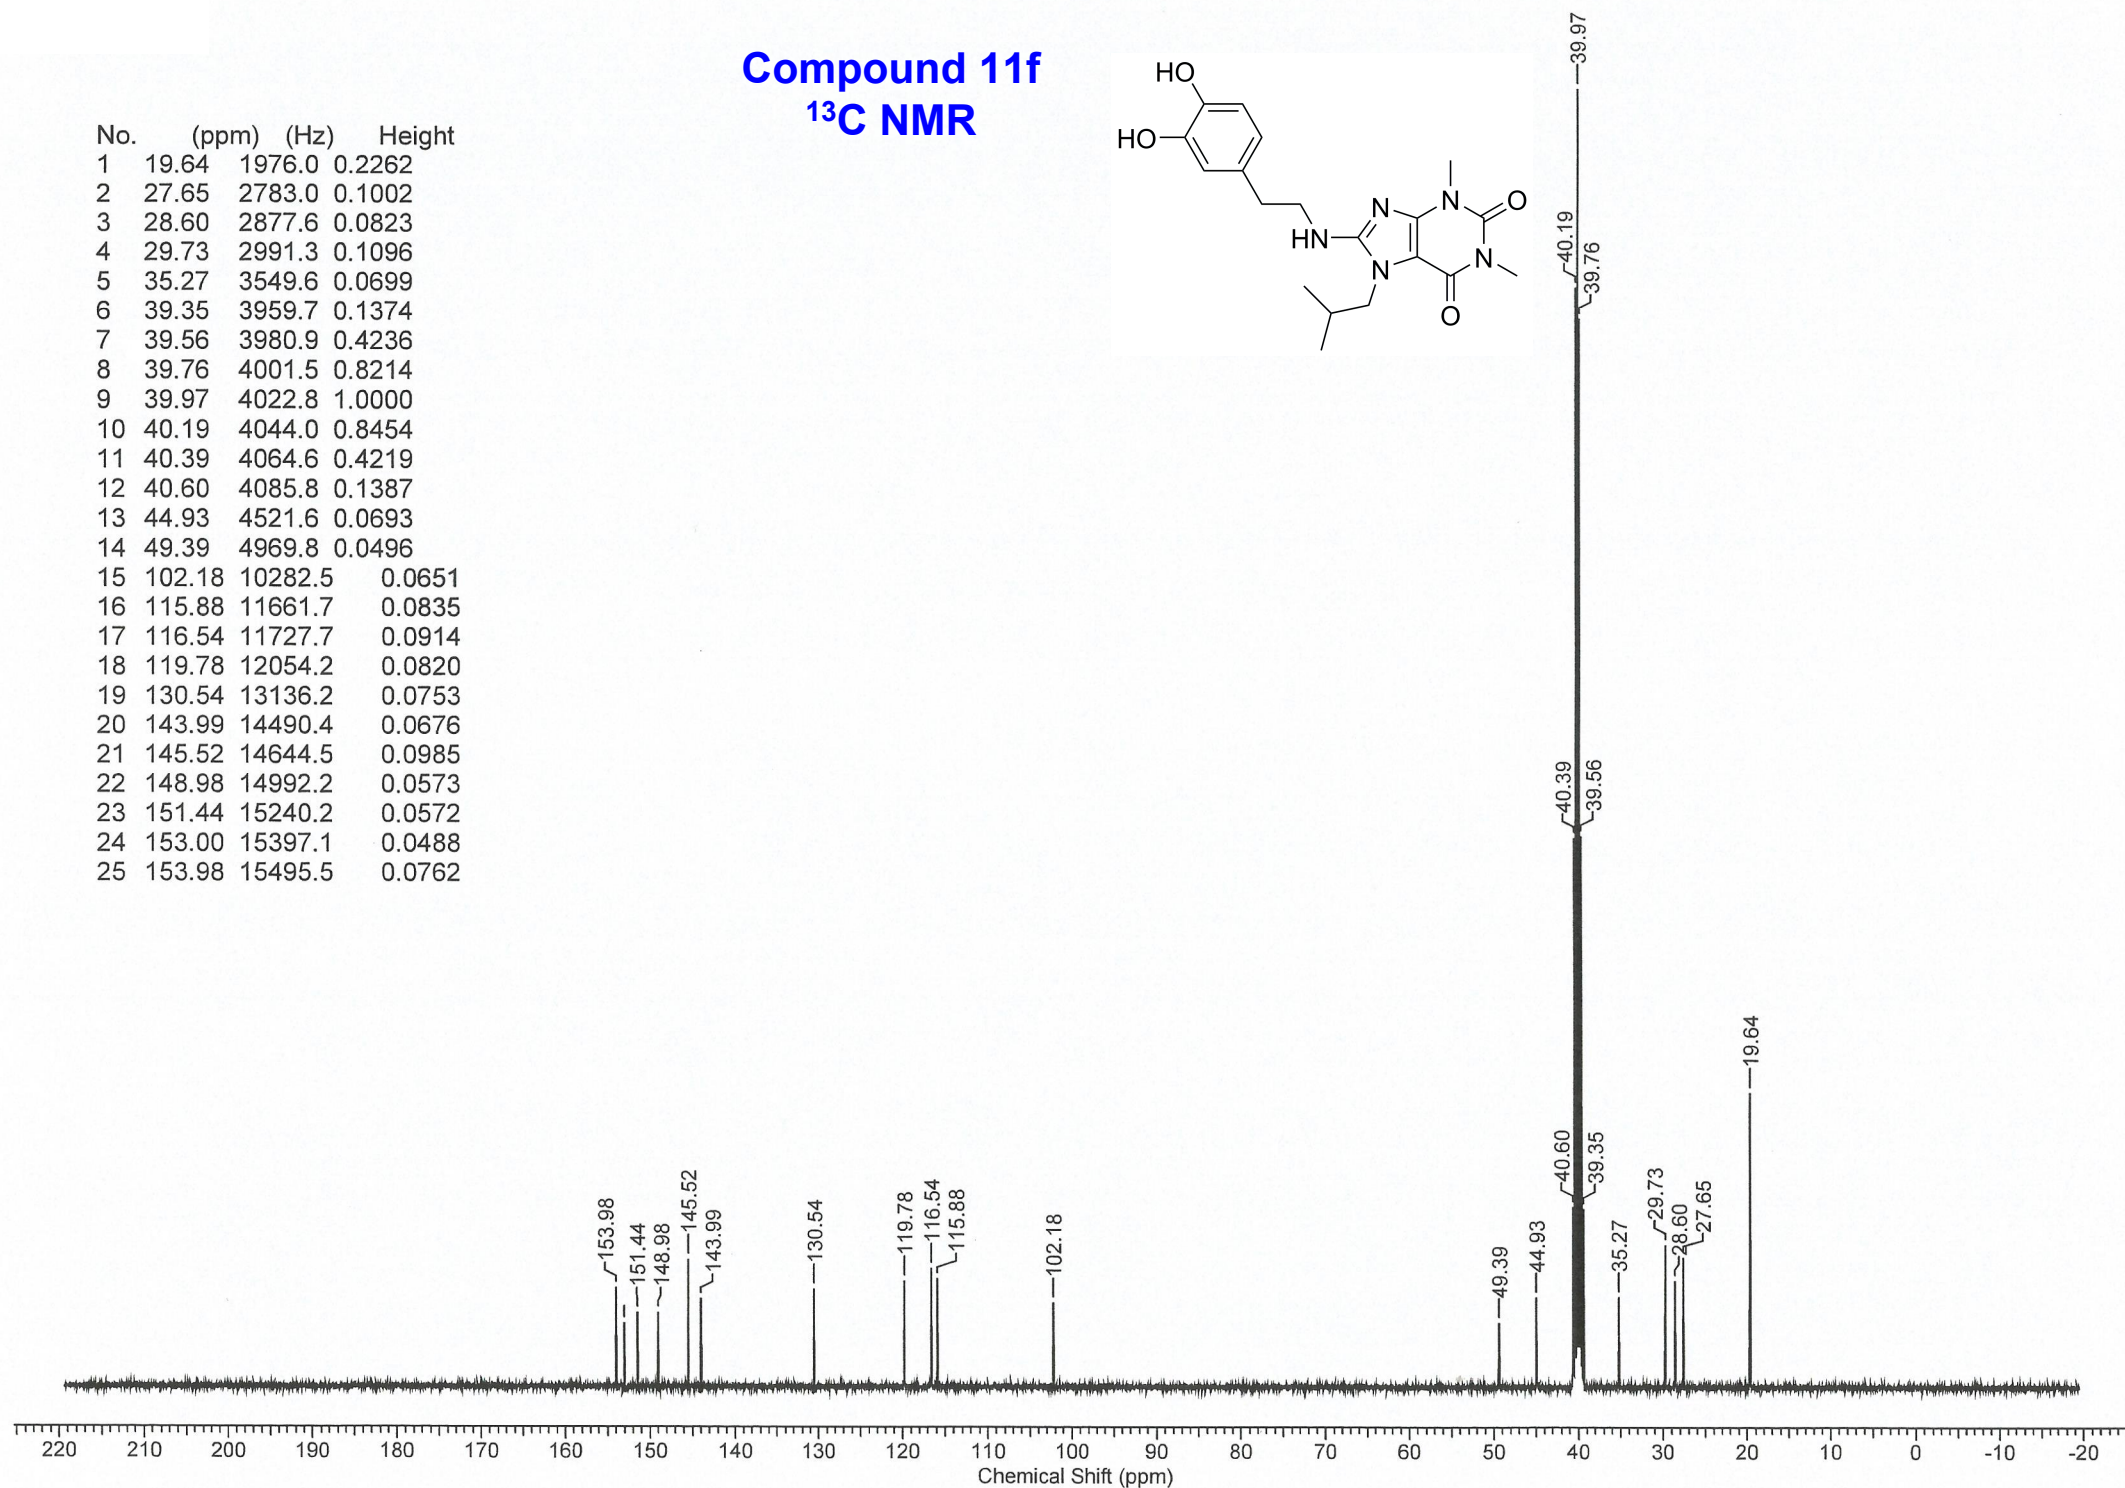

**Compound 11g**  
 **$^1\text{H}$  NMR - zoom of the**  
**aromatic region**

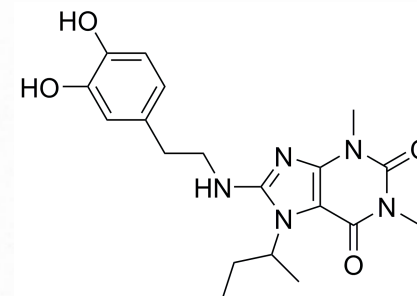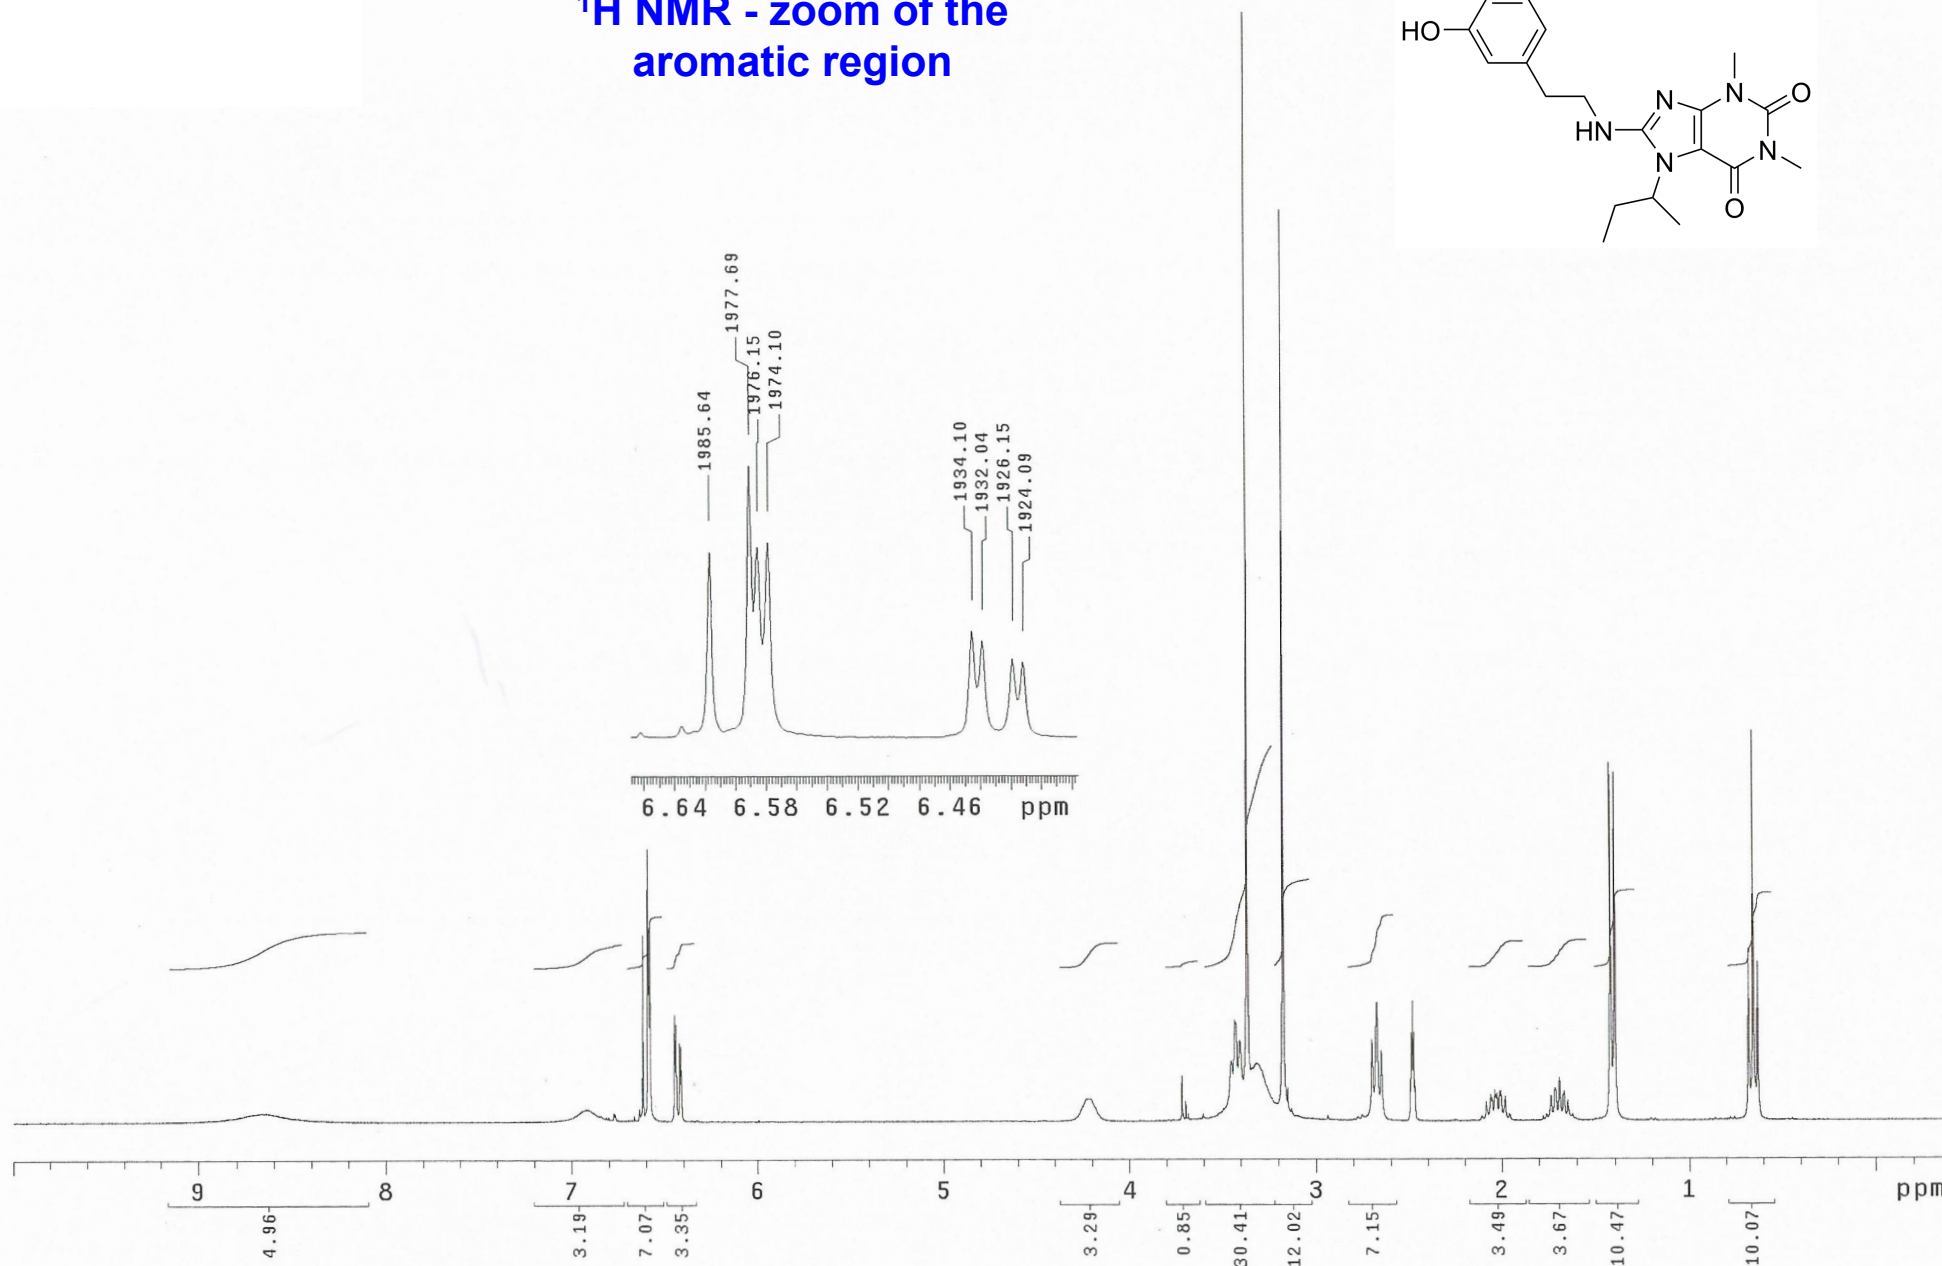

**Compound 11g**  
 **$^1\text{H}$  NMR - zoom of the**  
**aliphatic region**

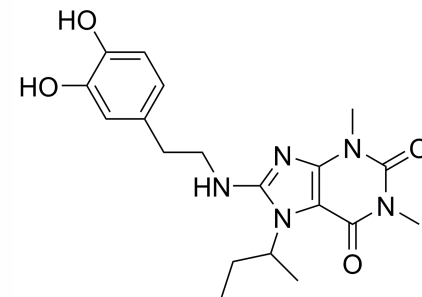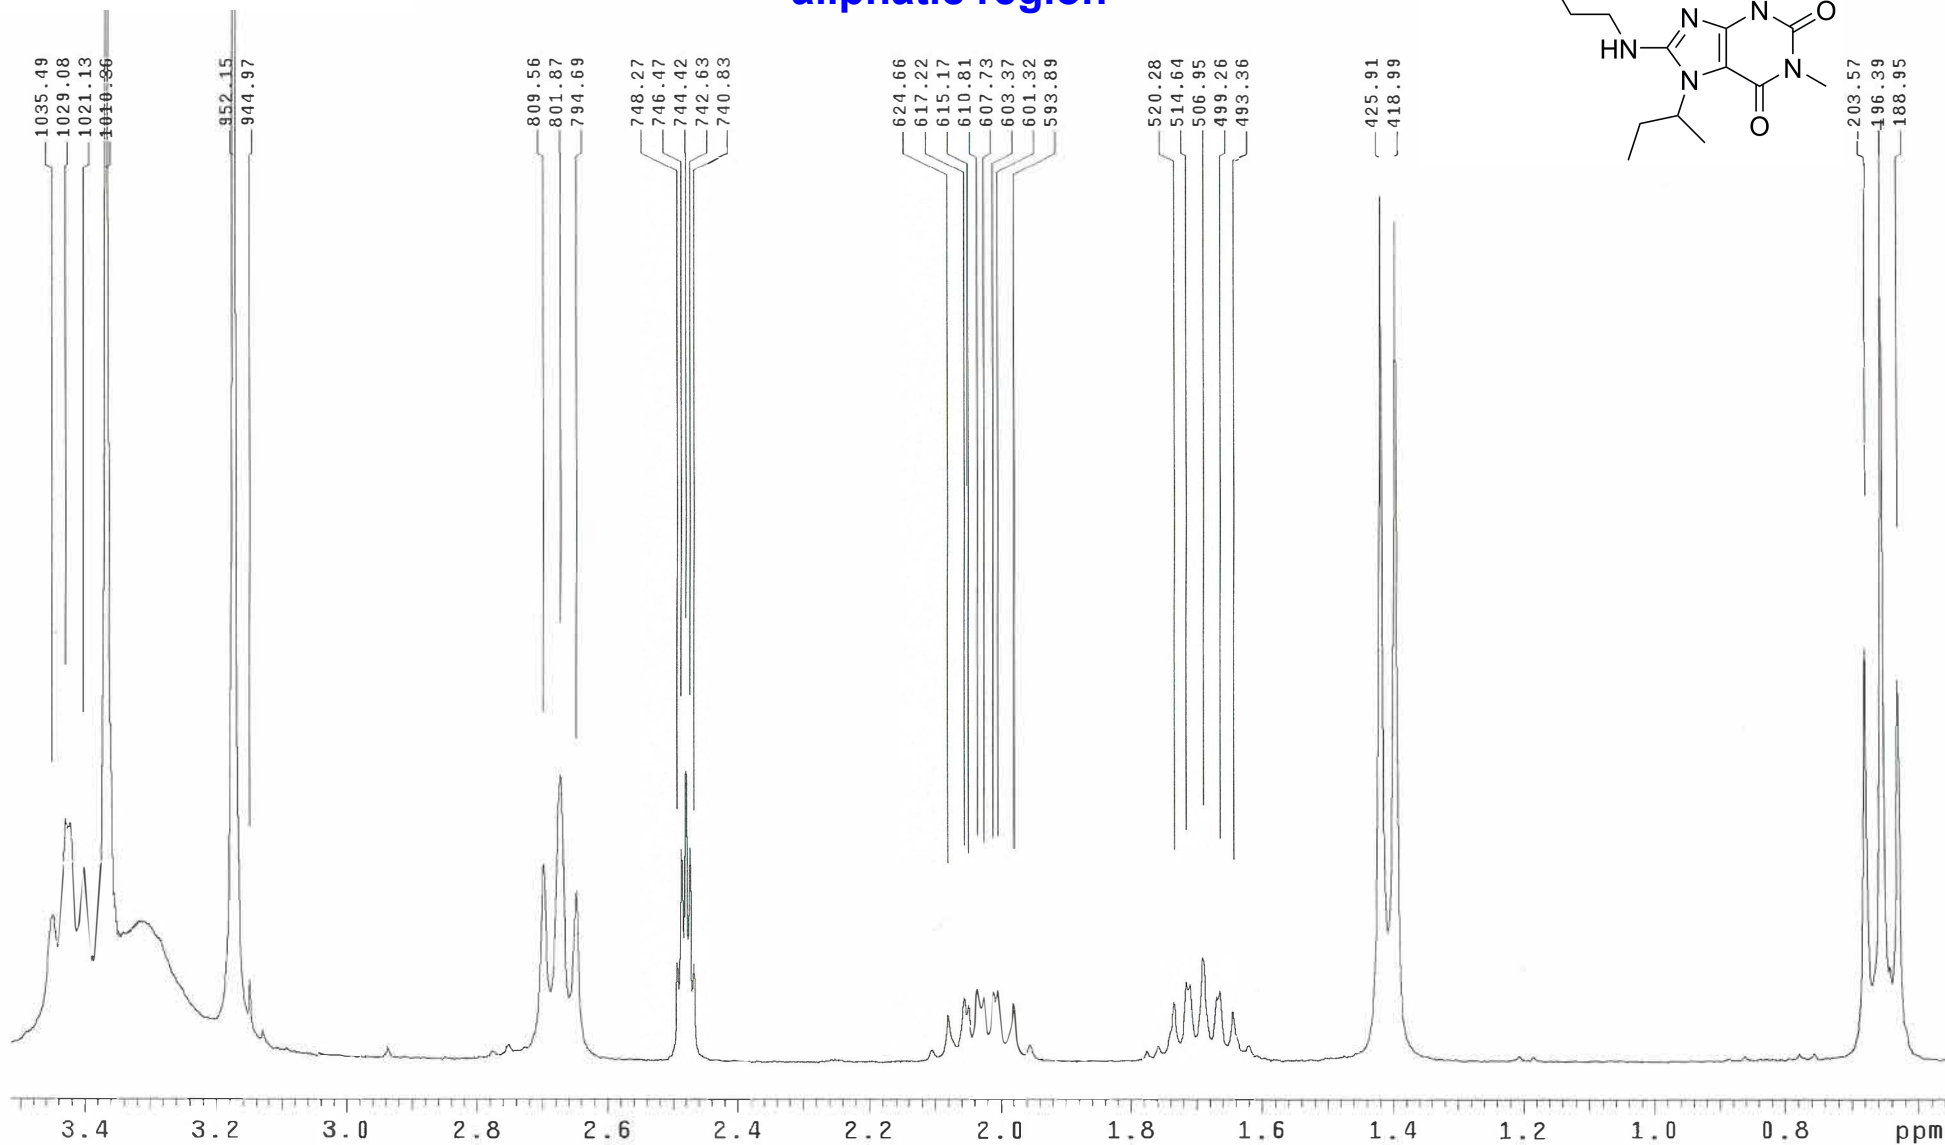

## Table of peaks

| INDEX | FREQUENCY | PPM   | HEIGHT | INDEX | FREQUENCY | PPM   | HEIGHT |
|-------|-----------|-------|--------|-------|-----------|-------|--------|
| 1     | 1985.642  | 6.617 | 24.2   | 40    | 593.886   | 1.979 | 3.2    |
| 2     | 1977.692  | 6.591 | 35.4   | 41    | 520.285   | 1.734 | 3.2    |
| 3     | 1976.153  | 6.585 | 24.9   | 42    | 514.643   | 1.715 | 4.3    |
| 4     | 1974.101  | 6.579 | 25.5   | 43    | 512.848   | 1.709 | 4.1    |
| 5     | 1934.095  | 6.445 | 13.9   | 44    | 506.949   | 1.689 | 5.6    |
| 6     | 1932.043  | 6.438 | 12.6   | 45    | 499.256   | 1.664 | 3.8    |
| 7     | 1926.145  | 6.419 | 10.2   | 46    | 493.358   | 1.644 | 2.7    |
| 8     | 1924.093  | 6.412 | 9.8    | 47    | 425.911   | 1.419 | 46.6   |
| 9     | 1263.478  | 4.210 | 2.9    | 48    | 418.987   | 1.396 | 45.3   |
| 10    | 1114.737  | 3.715 | 5.9    | 49    | 203.569   | 0.678 | 22.3   |
| 11    | 1108.582  | 3.694 | 2.5    | 50    | 196.388   | 0.654 | 50.7   |
| 12    | 1035.493  | 3.451 | 7.8    | 51    | 192.541   | 0.642 | 5.1    |
| 13    | 1029.082  | 3.429 | 13.1   | 52    | 188.951   | 0.630 | 20.6   |
| 14    | 1027.031  | 3.423 | 12.8   |       |           |       |        |
| 15    | 1021.132  | 3.403 | 10.5   |       |           |       |        |
| 16    | 1017.029  | 3.389 | 5.6    |       |           |       |        |
| 17    | 1016.516  | 3.387 | 5.7    |       |           |       |        |
| 18    | 1016.003  | 3.386 | 5.7    |       |           |       |        |
| 19    | 1010.361  | 3.367 | 144.0  |       |           |       |        |
| 20    | 1005.232  | 3.350 | 7.2    |       |           |       |        |
| 21    | 1004.719  | 3.348 | 7.0    |       |           |       |        |
| 22    | 1004.206  | 3.346 | 6.8    |       |           |       |        |
| 23    | 994.718   | 3.315 | 7.6    |       |           |       |        |
| 24    | 952.147   | 3.173 | 118.3  |       |           |       |        |
| 25    | 944.966   | 3.149 | 4.3    |       |           |       |        |
| 26    | 809.561   | 2.698 | 10.6   |       |           |       |        |
| 27    | 801.867   | 2.672 | 15.4   |       |           |       |        |
| 28    | 794.687   | 2.648 | 9.1    |       |           |       |        |
| 29    | 748.269   | 2.494 | 5.3    |       |           |       |        |
| 30    | 746.474   | 2.488 | 11.4   |       |           |       |        |
| 31    | 744.422   | 2.481 | 15.6   |       |           |       |        |
| 32    | 742.627   | 2.475 | 11.5   |       |           |       |        |
| 33    | 740.832   | 2.469 | 5.2    |       |           |       |        |
| 34    | 617.223   | 2.057 | 3.4    |       |           |       |        |
| 35    | 615.171   | 2.050 | 3.0    |       |           |       |        |
| 36    | 610.812   | 2.035 | 3.9    |       |           |       |        |
| 37    | 607.734   | 2.025 | 3.5    |       |           |       |        |
| 38    | 603.375   | 2.011 | 3.8    |       |           |       |        |
| 39    | 601.323   | 2.004 | 3.9    |       |           |       |        |

# Compound 11g <sup>13</sup>C NMR

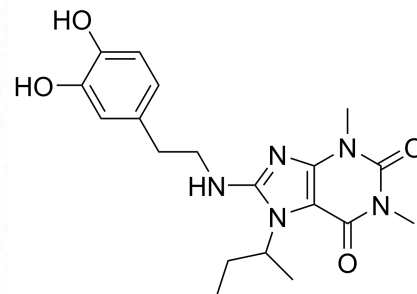

| No. | (ppm)  | (Hz)    | Height |
|-----|--------|---------|--------|
| 1   | 11.41  | 1148.5  | 0.1684 |
| 2   | 19.92  | 2004.6  | 0.0594 |
| 3   | 28.09  | 2827.0  | 0.0493 |
| 4   | 28.14  | 2831.4  | 0.1303 |
| 5   | 29.78  | 2996.5  | 0.1380 |
| 6   | 35.18  | 3540.0  | 0.0808 |
| 7   | 39.35  | 3960.4  | 0.1342 |
| 8   | 39.57  | 3981.7  | 0.4308 |
| 9   | 39.78  | 4002.9  | 0.8577 |
| 10  | 39.98  | 4023.5  | 1.0000 |
| 11  | 40.19  | 4044.8  | 0.8673 |
| 12  | 40.40  | 4066.0  | 0.4258 |
| 13  | 40.61  | 4086.6  | 0.1393 |
| 14  | 45.11  | 4539.9  | 0.0830 |
| 15  | 49.06  | 4936.8  | 0.0270 |
| 16  | 52.39  | 5272.1  | 0.0795 |
| 17  | 101.77 | 10241.4 | 0.0618 |
| 18  | 115.88 | 11660.9 | 0.1058 |
| 19  | 116.59 | 11732.8 | 0.0989 |
| 20  | 119.83 | 12058.6 | 0.0994 |
| 21  | 130.62 | 13144.3 | 0.0943 |
| 22  | 143.97 | 14488.2 | 0.1083 |
| 23  | 145.51 | 14643.0 | 0.1230 |
| 24  | 150.18 | 15113.2 | 0.0263 |
| 25  | 151.38 | 15233.6 | 0.0762 |
| 26  | 152.67 | 15363.4 | 0.0654 |
| 27  | 153.95 | 15492.5 | 0.0604 |

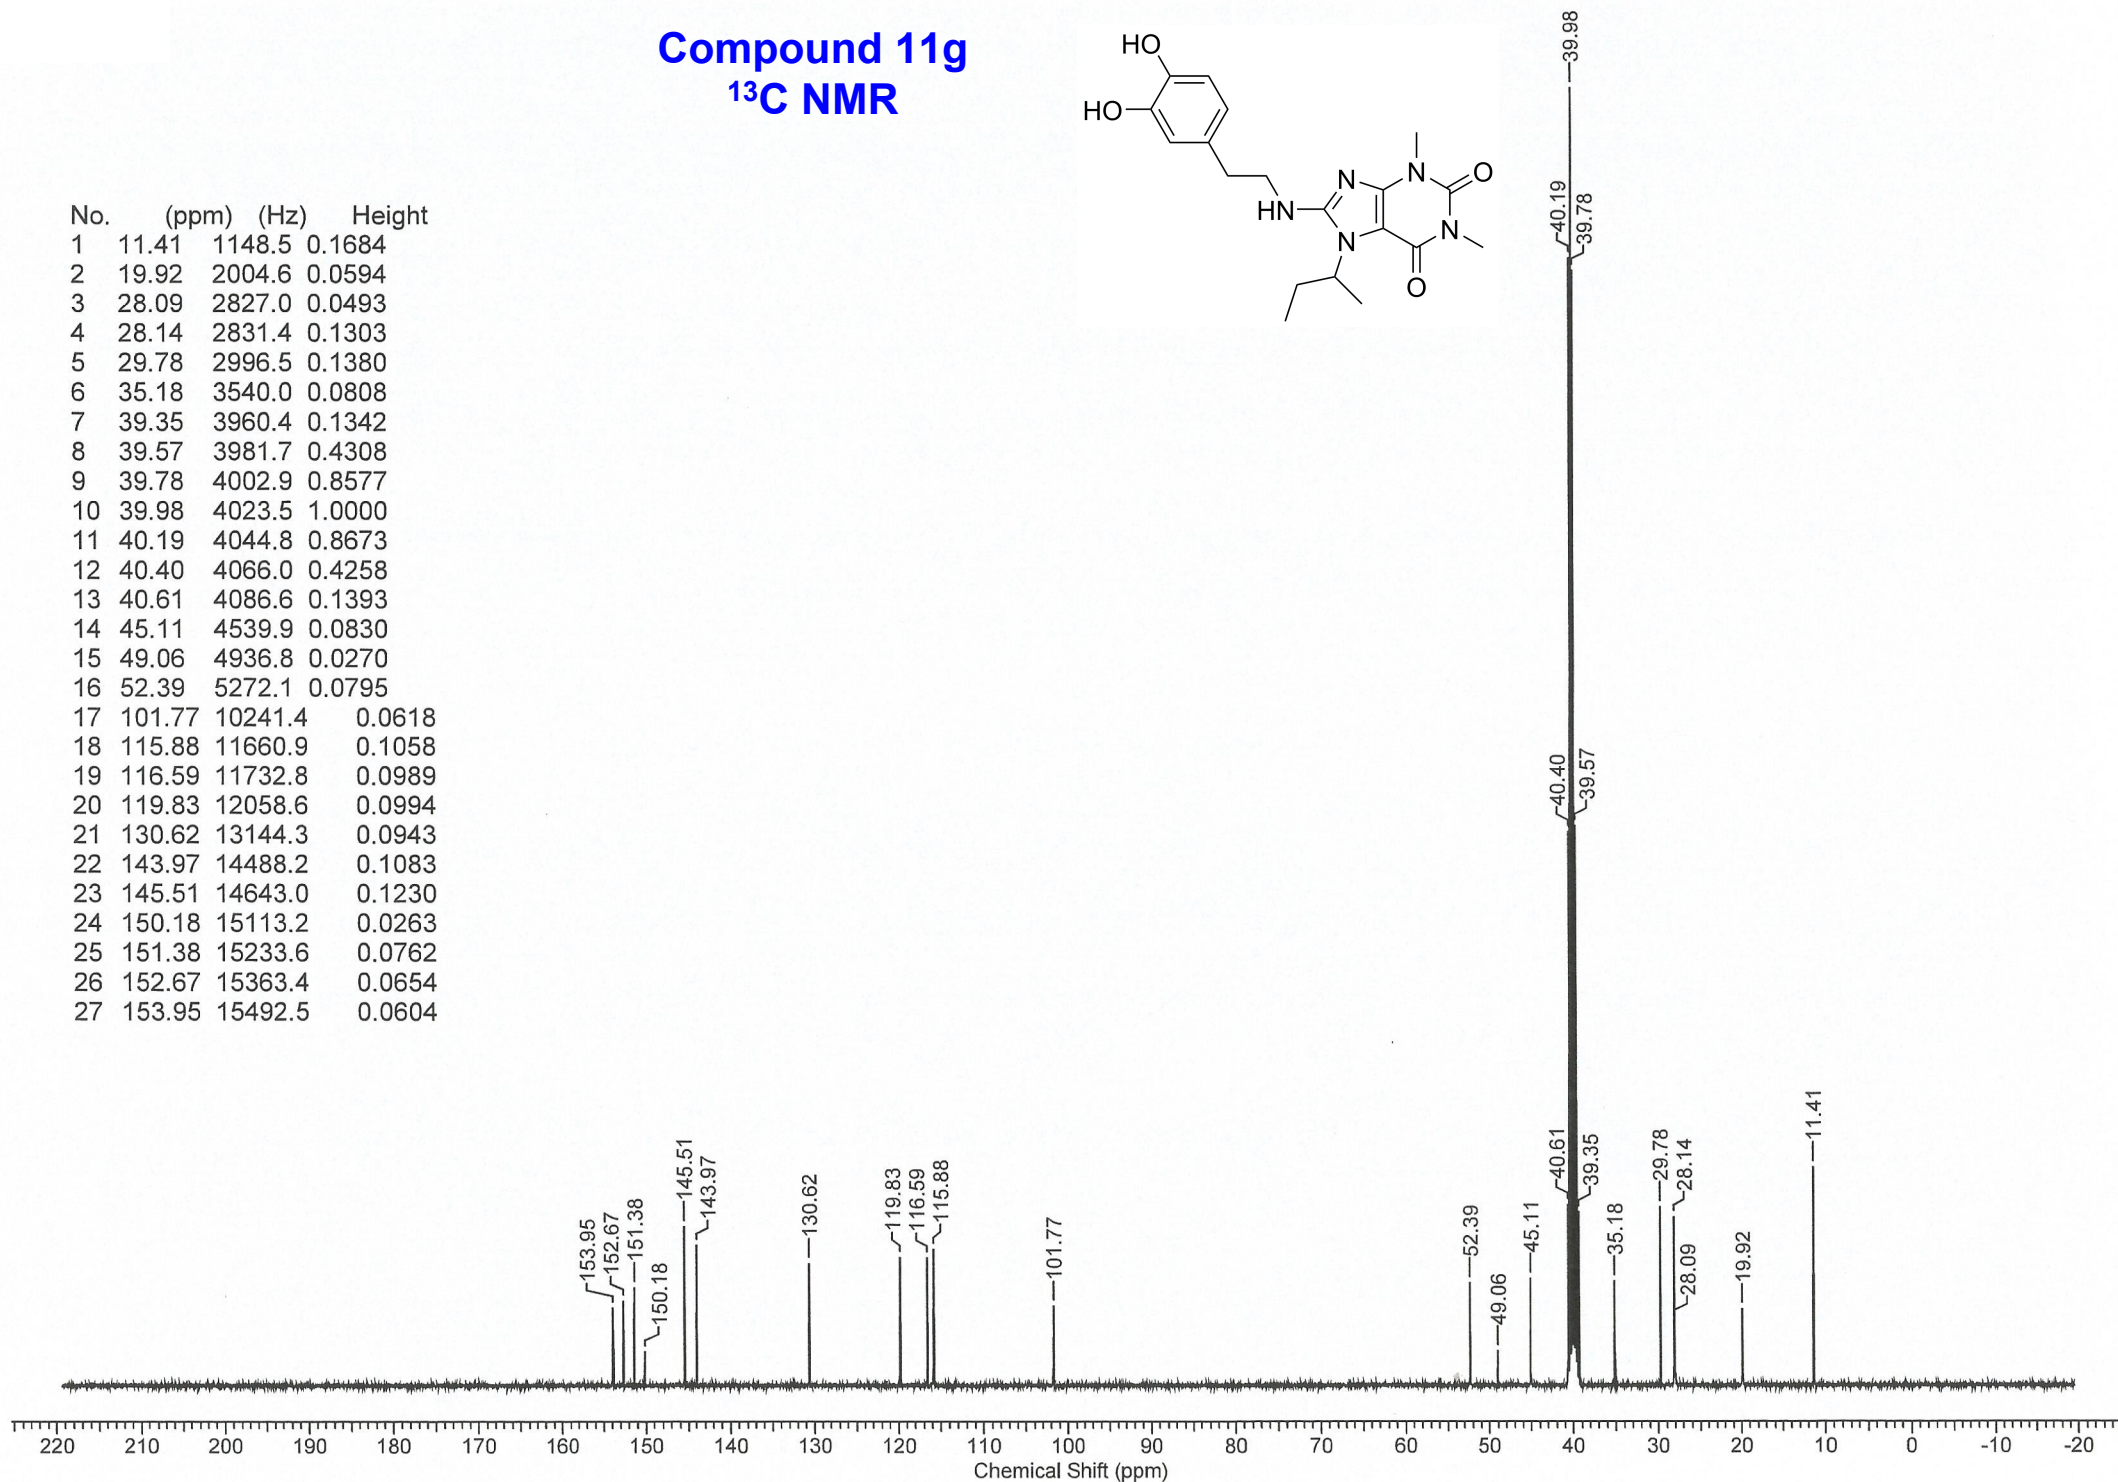

2-((4-hydroxyphenyl)ethyl)amino-4,6-dimethyl-1,3,5-triazine-3-carbonyl-1,1-dimethylhydrazine

Compound 11h  
<sup>1</sup>H NMR

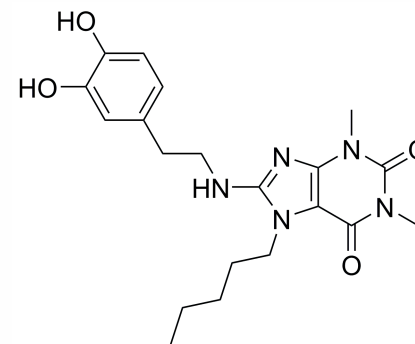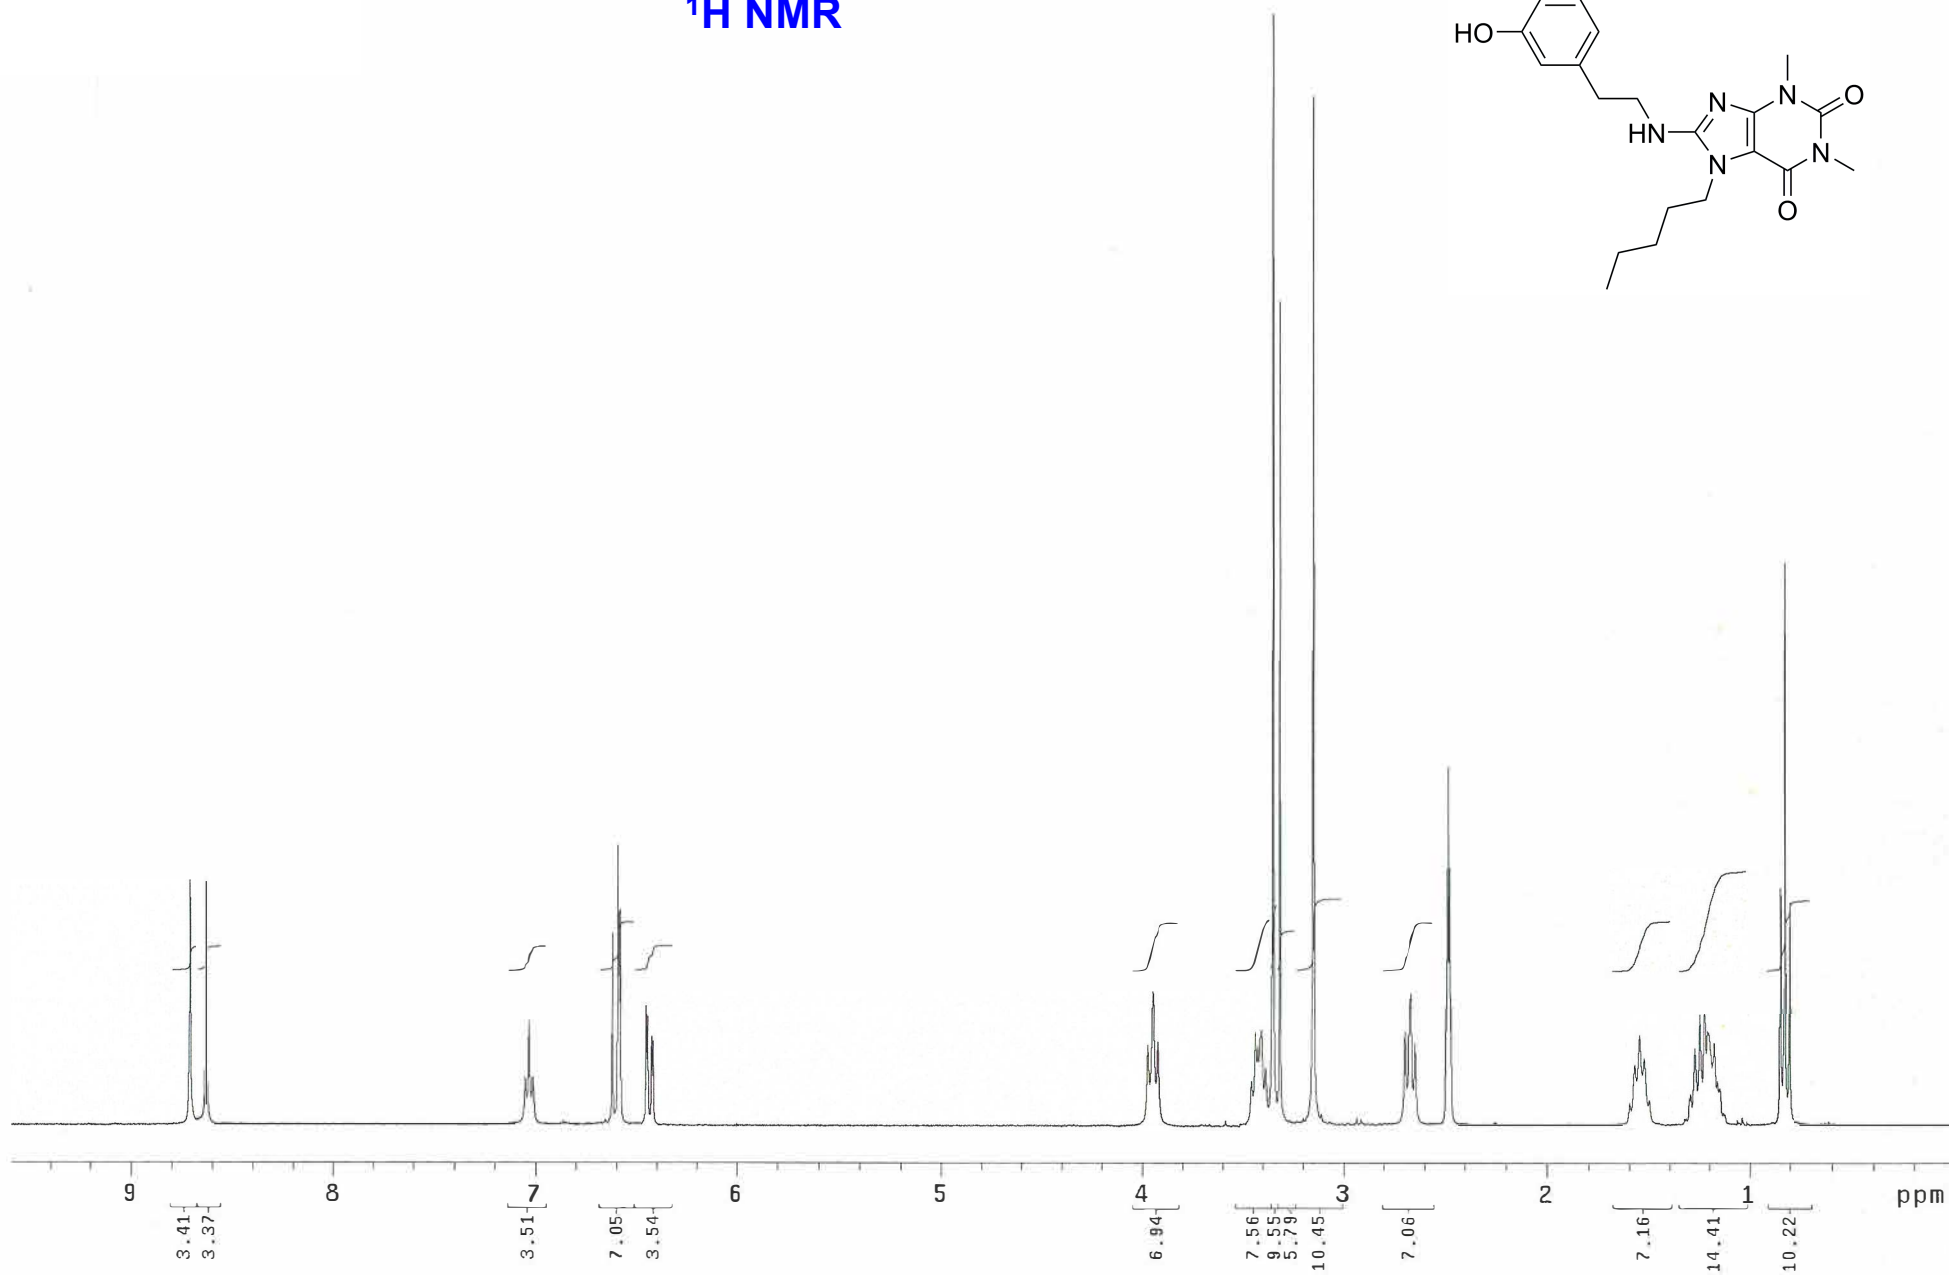

**Compound 11h**  
**<sup>1</sup>H NMR - zoom of the**  
**aliphatic region**

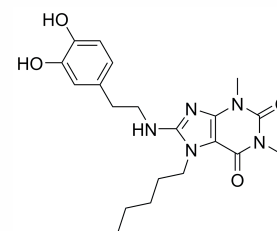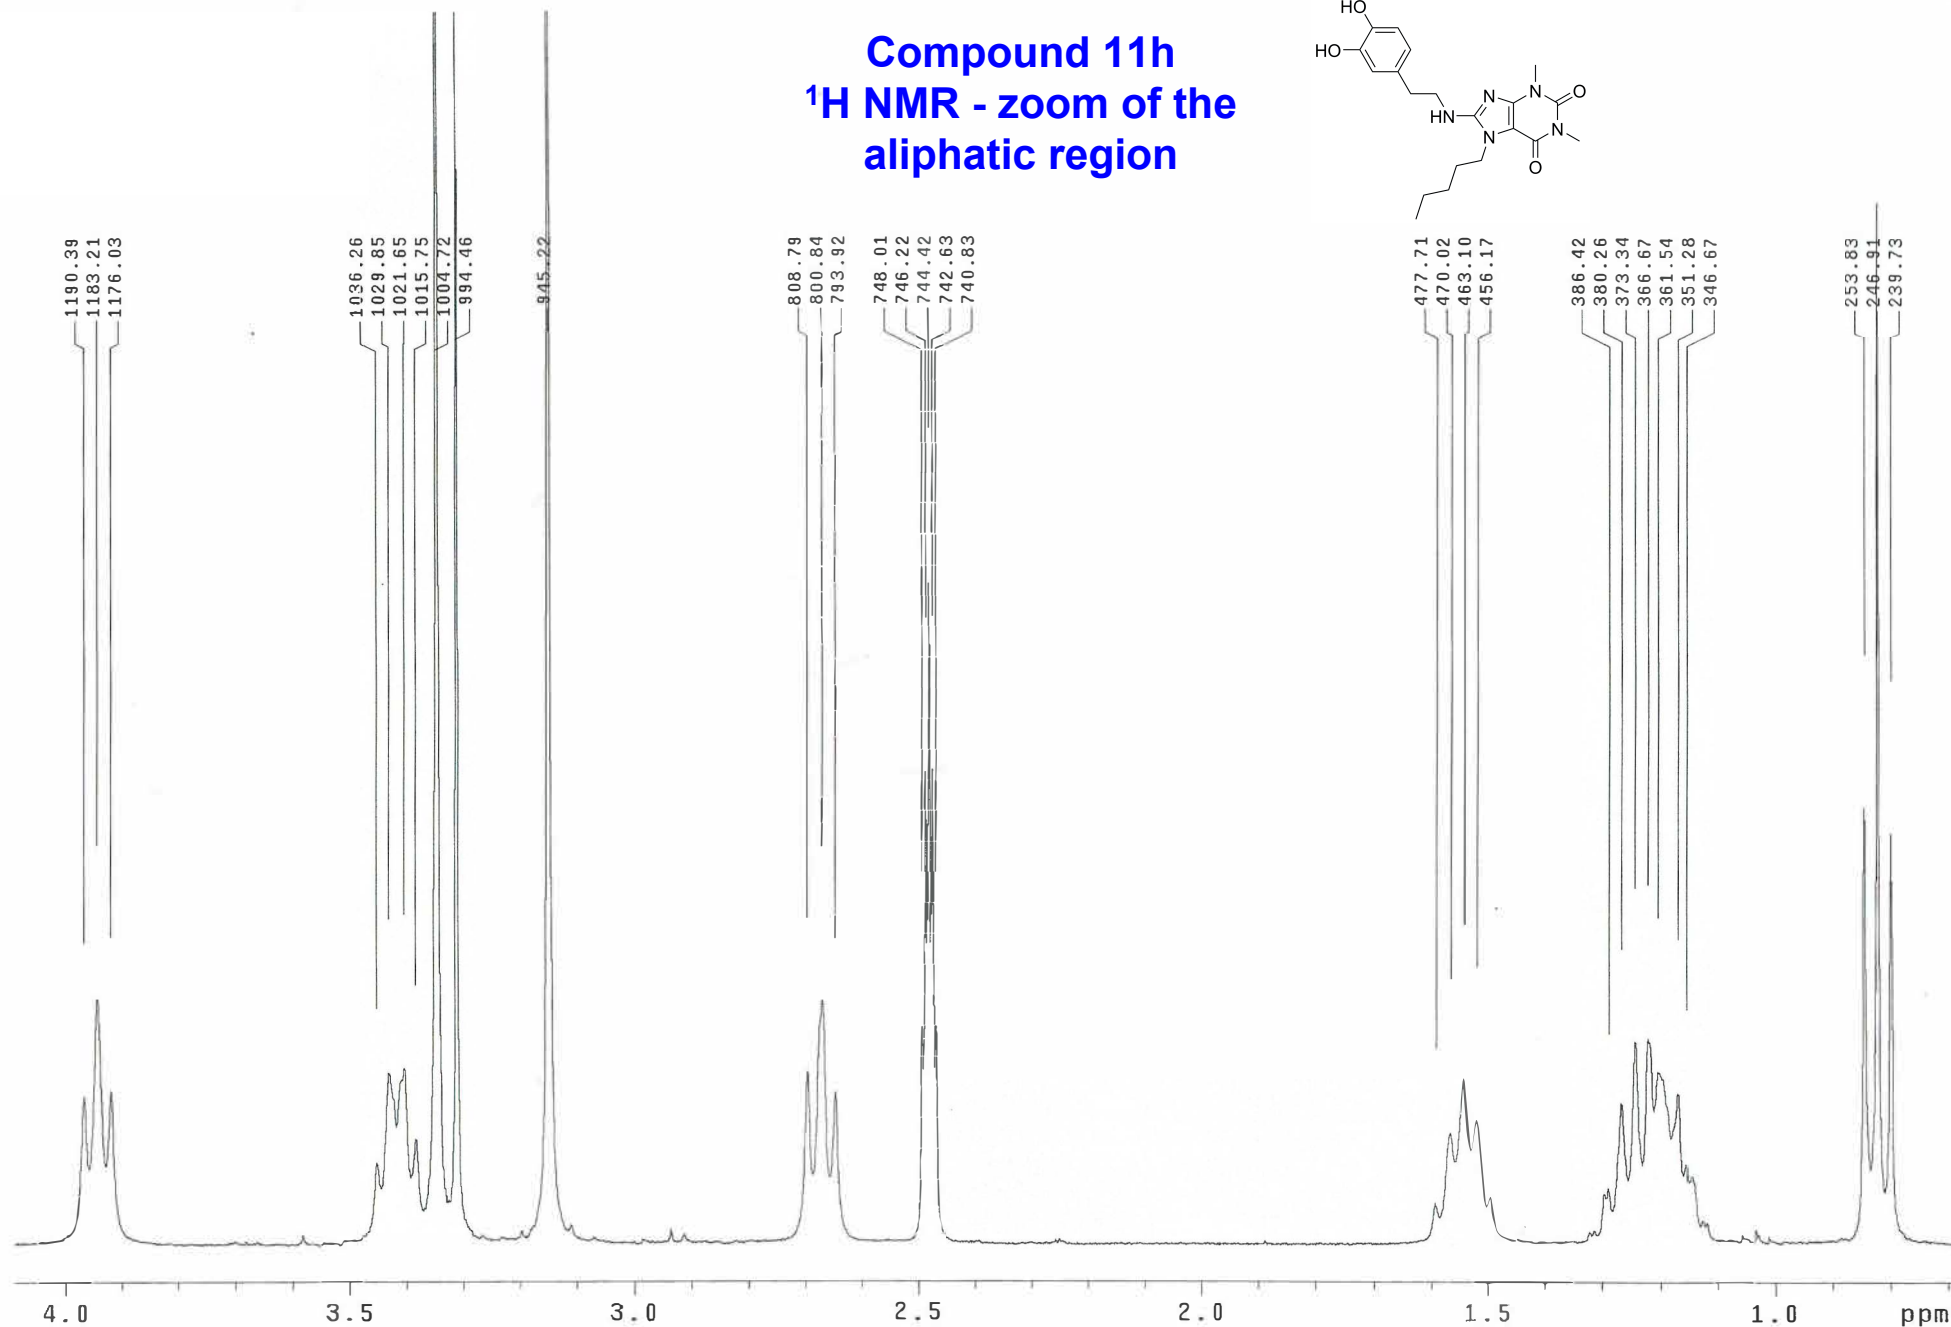

**Compound 11h**  
 **$^1\text{H}$  NMR - zoom of the**  
**aromatic region**

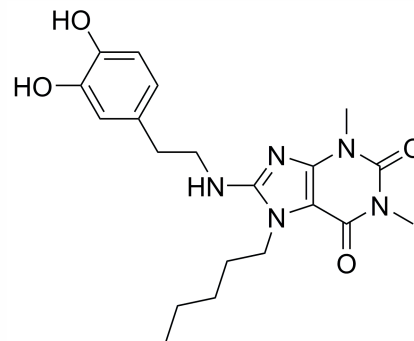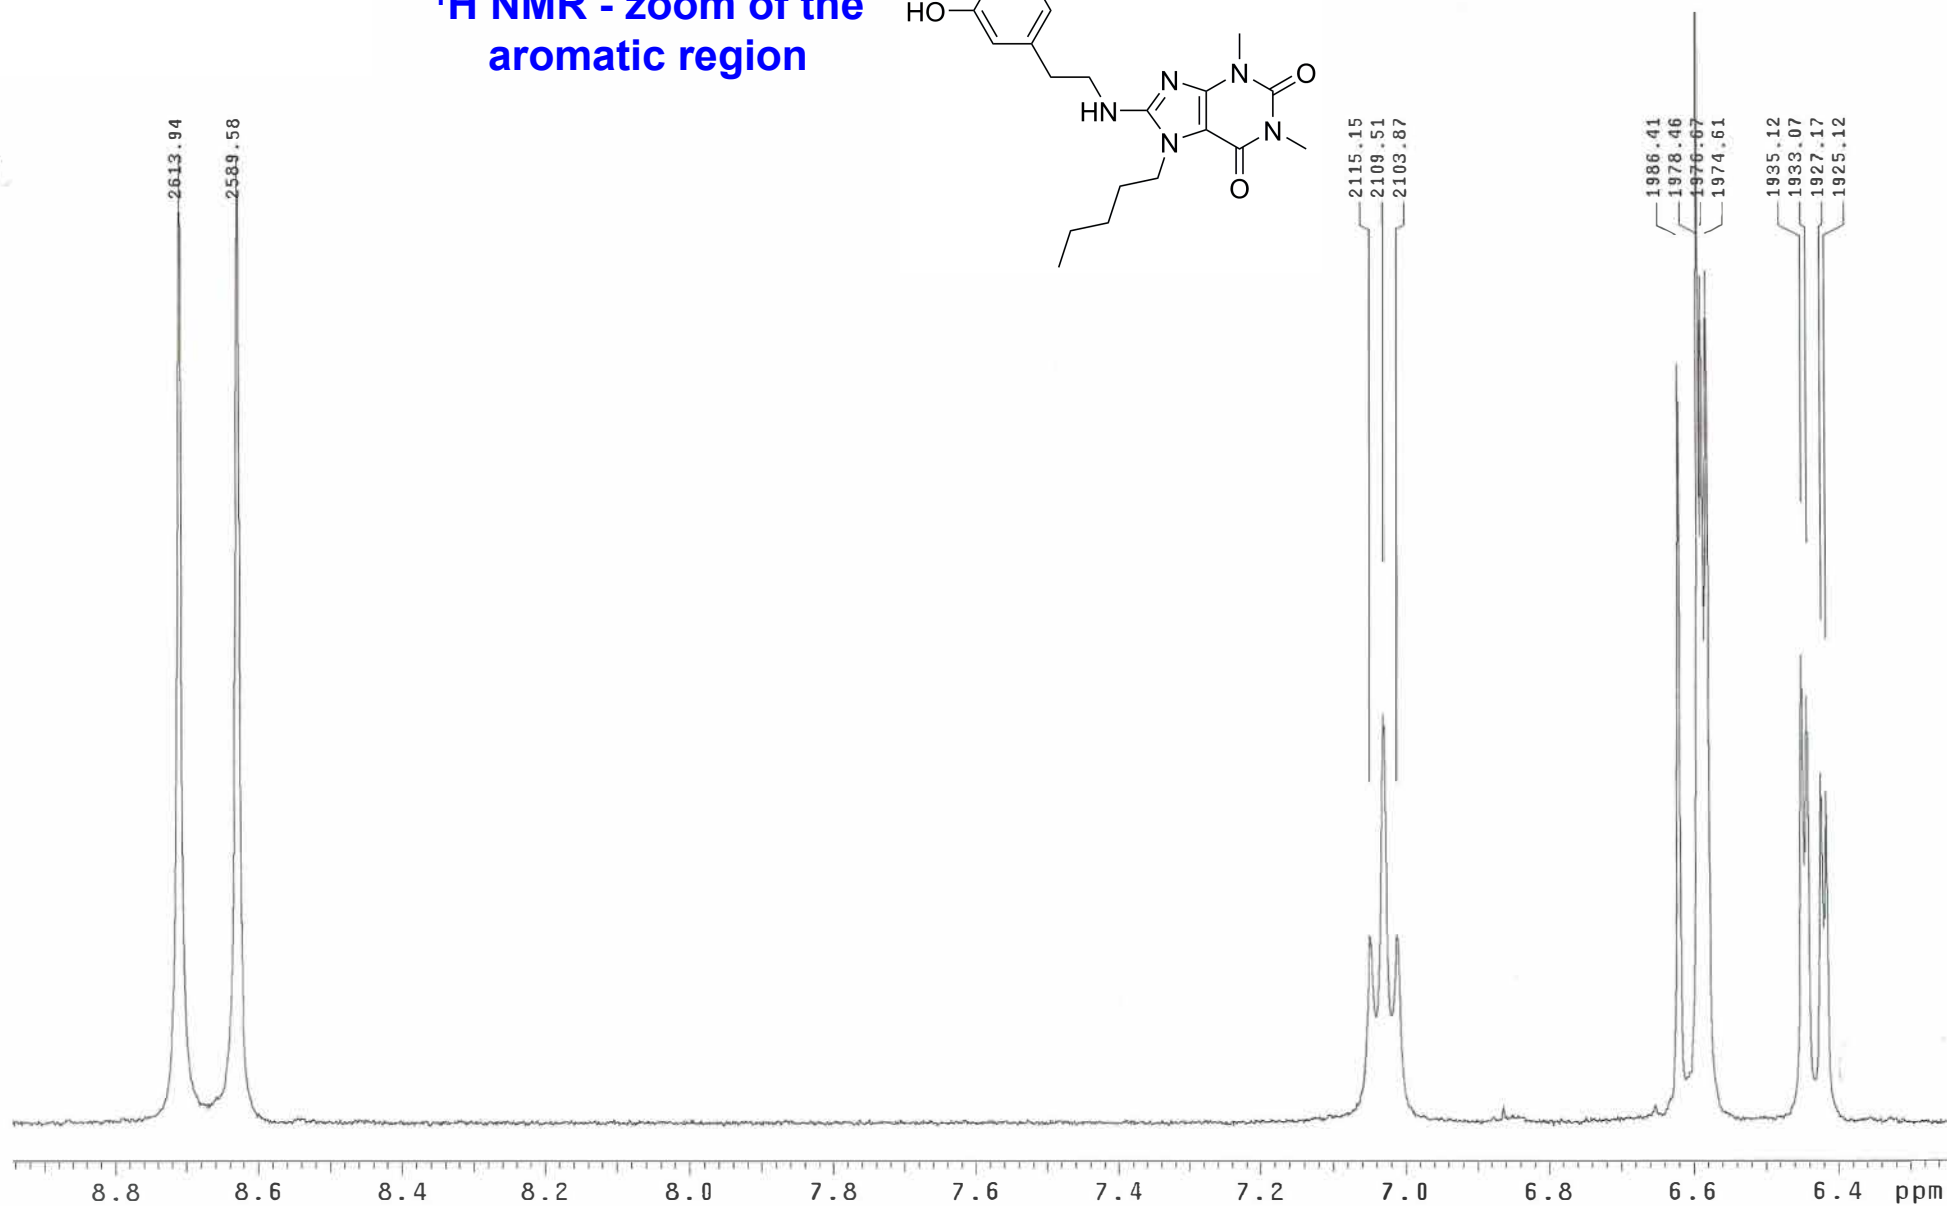

## Table of peaks

| INDEX | FREQUENCY | PPM   | HEIGHT | INDEX | FREQUENCY | PPM   | HEIGHT |
|-------|-----------|-------|--------|-------|-----------|-------|--------|
| 1     | 2613.945  | 8.711 | 31.7   | 40    | 373.339   | 1.244 | 14.2   |
| 2     | 2589.582  | 8.630 | 31.5   | 41    | 366.671   | 1.222 | 14.5   |
| 3     | 2115.149  | 7.049 | 6.1    | 42    | 361.542   | 1.205 | 12.1   |
| 4     | 2109.507  | 7.030 | 13.4   | 43    | 351.284   | 1.171 | 10.6   |
| 5     | 2103.865  | 7.011 | 6.1    | 44    | 346.668   | 1.155 | 5.7    |
| 6     | 1986.411  | 6.620 | 24.8   | 45    | 343.591   | 1.145 | 4.7    |
| 7     | 1978.461  | 6.593 | 36.3   | 46    | 253.833   | 0.846 | 30.7   |
| 8     | 1976.666  | 6.587 | 27.7   | 47    | 246.909   | 0.823 | 73.1   |
| 9     | 1974.614  | 6.580 | 27.8   | 48    | 239.728   | 0.799 | 28.9   |
| 10    | 1935.121  | 6.449 | 15.3   |       |           |       |        |
| 11    | 1933.069  | 6.442 | 14.0   |       |           |       |        |
| 12    | 1927.171  | 6.422 | 11.4   |       |           |       |        |
| 13    | 1925.119  | 6.415 | 10.8   |       |           |       |        |
| 14    | 1190.389  | 3.967 | 10.4   |       |           |       |        |
| 15    | 1183.209  | 3.943 | 17.2   |       |           |       |        |
| 16    | 1176.028  | 3.919 | 10.8   |       |           |       |        |
| 17    | 1036.263  | 3.453 | 5.7    |       |           |       |        |
| 18    | 1029.852  | 3.432 | 12.0   |       |           |       |        |
| 19    | 1021.645  | 3.405 | 12.3   |       |           |       |        |
| 20    | 1015.747  | 3.385 | 7.3    |       |           |       |        |
| 21    | 1004.719  | 3.348 | 144.0  |       |           |       |        |
| 22    | 994.461   | 3.314 | 106.8  |       |           |       |        |
| 23    | 945.223   | 3.150 | 133.3  |       |           |       |        |
| 24    | 808.791   | 2.695 | 12.0   |       |           |       |        |
| 25    | 800.841   | 2.669 | 17.0   |       |           |       |        |
| 26    | 793.917   | 2.646 | 10.6   |       |           |       |        |
| 27    | 748.013   | 2.493 | 15.2   |       |           |       |        |
| 28    | 746.218   | 2.487 | 33.2   |       |           |       |        |
| 29    | 744.422   | 2.481 | 46.5   |       |           |       |        |
| 30    | 742.627   | 2.475 | 33.4   |       |           |       |        |
| 31    | 740.832   | 2.469 | 15.2   |       |           |       |        |
| 32    | 477.714   | 1.592 | 2.9    |       |           |       |        |
| 33    | 470.021   | 1.566 | 7.8    |       |           |       |        |
| 34    | 463.096   | 1.543 | 11.6   |       |           |       |        |
| 35    | 456.172   | 1.520 | 8.7    |       |           |       |        |
| 36    | 448.735   | 1.495 | 3.3    |       |           |       |        |
| 37    | 388.726   | 1.295 | 3.6    |       |           |       |        |
| 38    | 386.418   | 1.288 | 3.9    |       |           |       |        |
| 39    | 380.263   | 1.267 | 9.9    |       |           |       |        |

# Compound 11h <sup>13</sup>C NMR

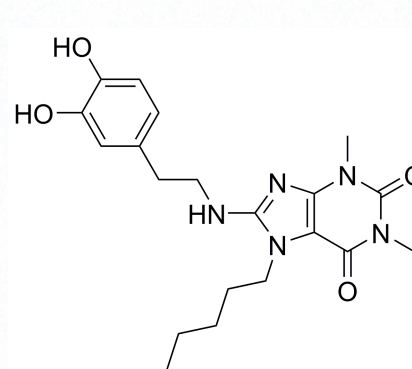

| No. | (ppm)  | (Hz)    | Height |
|-----|--------|---------|--------|
| 1   | 14.35  | 1444.2  | 0.2021 |
| 2   | 22.28  | 2242.3  | 0.1853 |
| 3   | 27.65  | 2782.2  | 0.1236 |
| 4   | 28.40  | 2857.8  | 0.1484 |
| 5   | 29.22  | 2940.7  | 0.0998 |
| 6   | 29.70  | 2989.1  | 0.1384 |
| 7   | 35.21  | 3543.7  | 0.0858 |
| 8   | 39.35  | 3959.7  | 0.1397 |
| 9   | 39.55  | 3980.2  | 0.4316 |
| 10  | 39.76  | 4001.5  | 0.8728 |
| 11  | 39.97  | 4022.8  | 1.0000 |
| 12  | 40.18  | 4043.3  | 0.8691 |
| 13  | 40.39  | 4064.6  | 0.4343 |
| 14  | 40.59  | 4085.1  | 0.1379 |
| 15  | 42.79  | 4305.9  | 0.0594 |
| 16  | 44.90  | 4517.9  | 0.0778 |
| 17  | 101.81 | 10245.8 | 0.0942 |
| 18  | 115.87 | 11660.2 | 0.0992 |
| 19  | 116.53 | 11727.0 | 0.1102 |
| 20  | 119.79 | 12054.9 | 0.1094 |
| 21  | 130.57 | 13139.9 | 0.0972 |
| 22  | 144.00 | 14491.2 | 0.1149 |
| 23  | 145.53 | 14645.2 | 0.1000 |
| 24  | 149.03 | 14997.3 | 0.0735 |
| 25  | 151.44 | 15240.2 | 0.0760 |
| 26  | 153.02 | 15398.6 | 0.0699 |
| 27  | 153.67 | 15464.6 | 0.0945 |

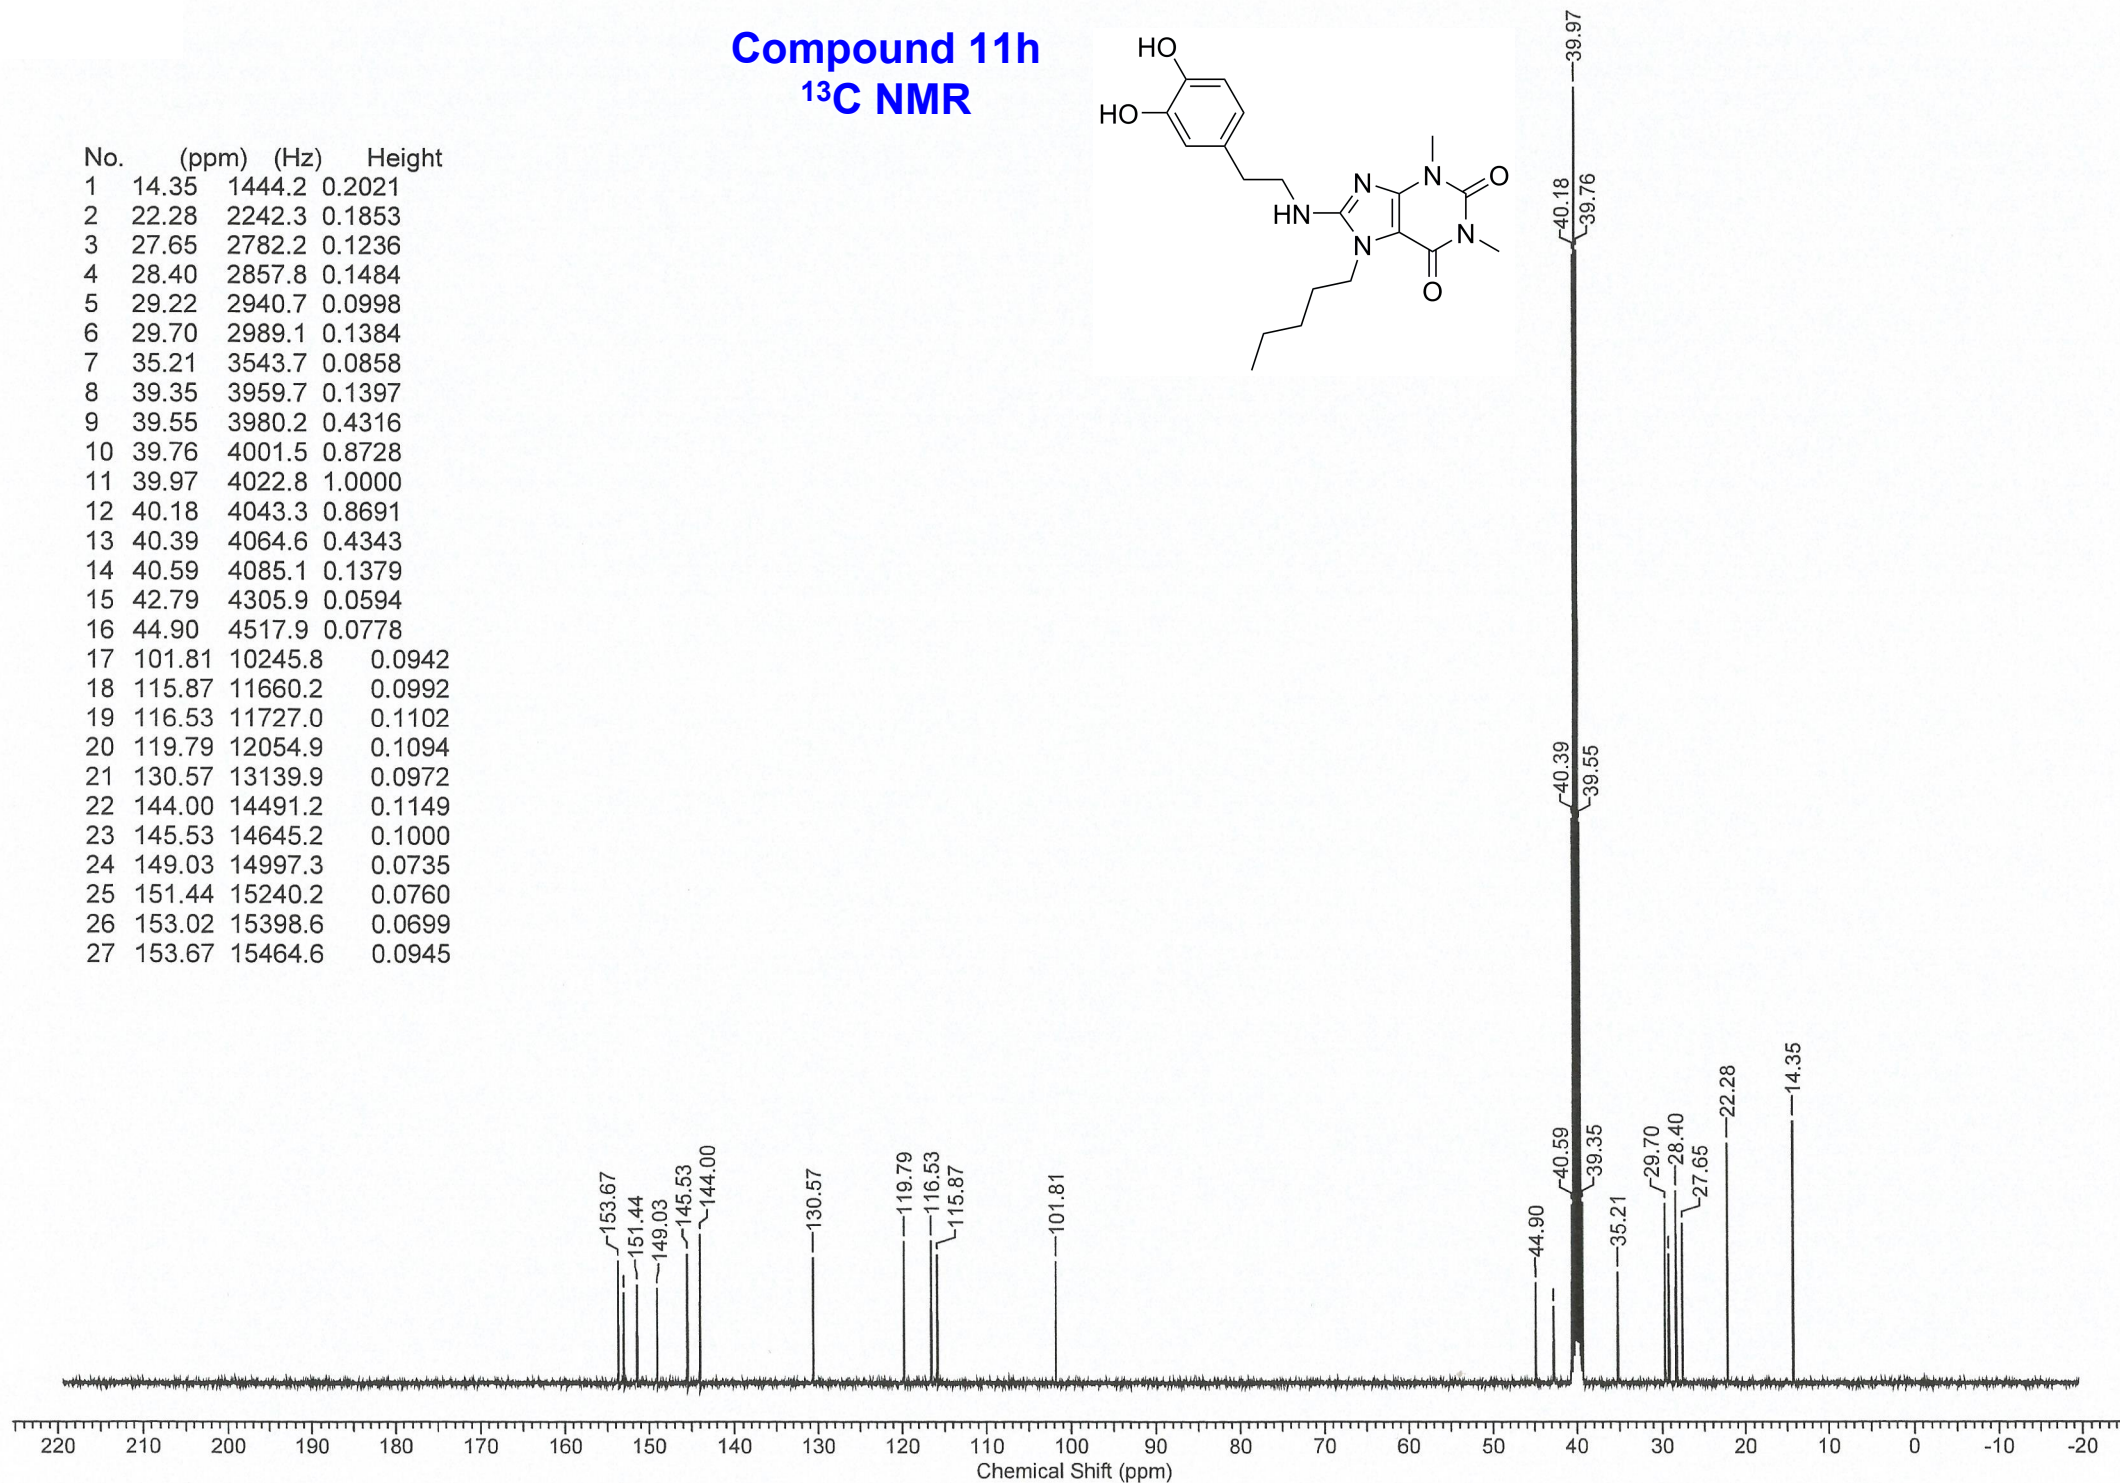

7-ethyl-1H-imidazo[4,5-b]pyridine

**Compound 11i**  
**<sup>1</sup>H NMR**

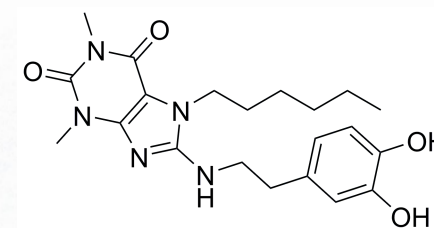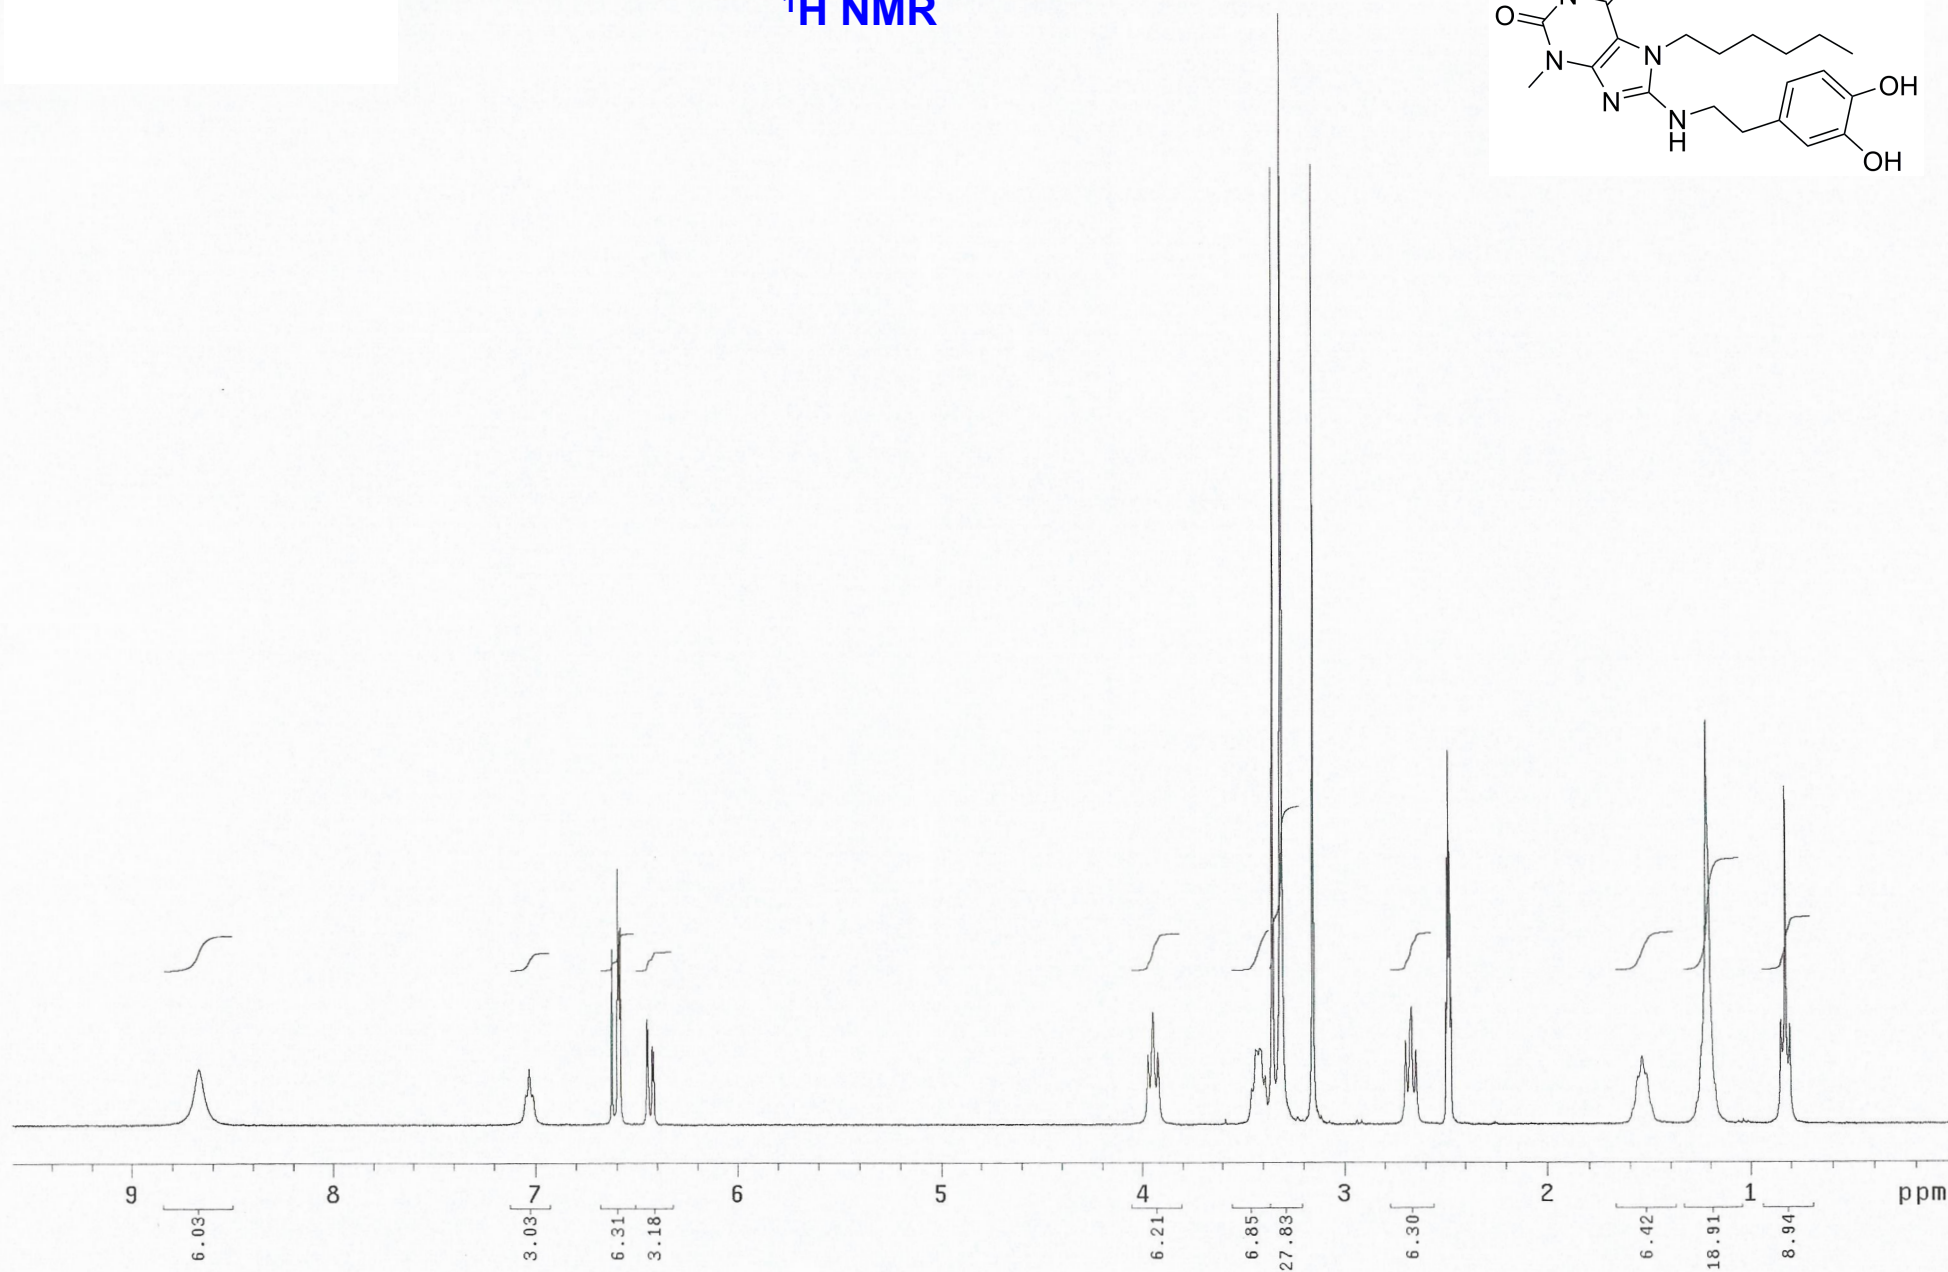

**Compound 11i**  
**<sup>1</sup>H NMR - zoom of the**  
**aliphatic region**

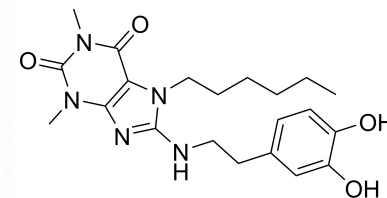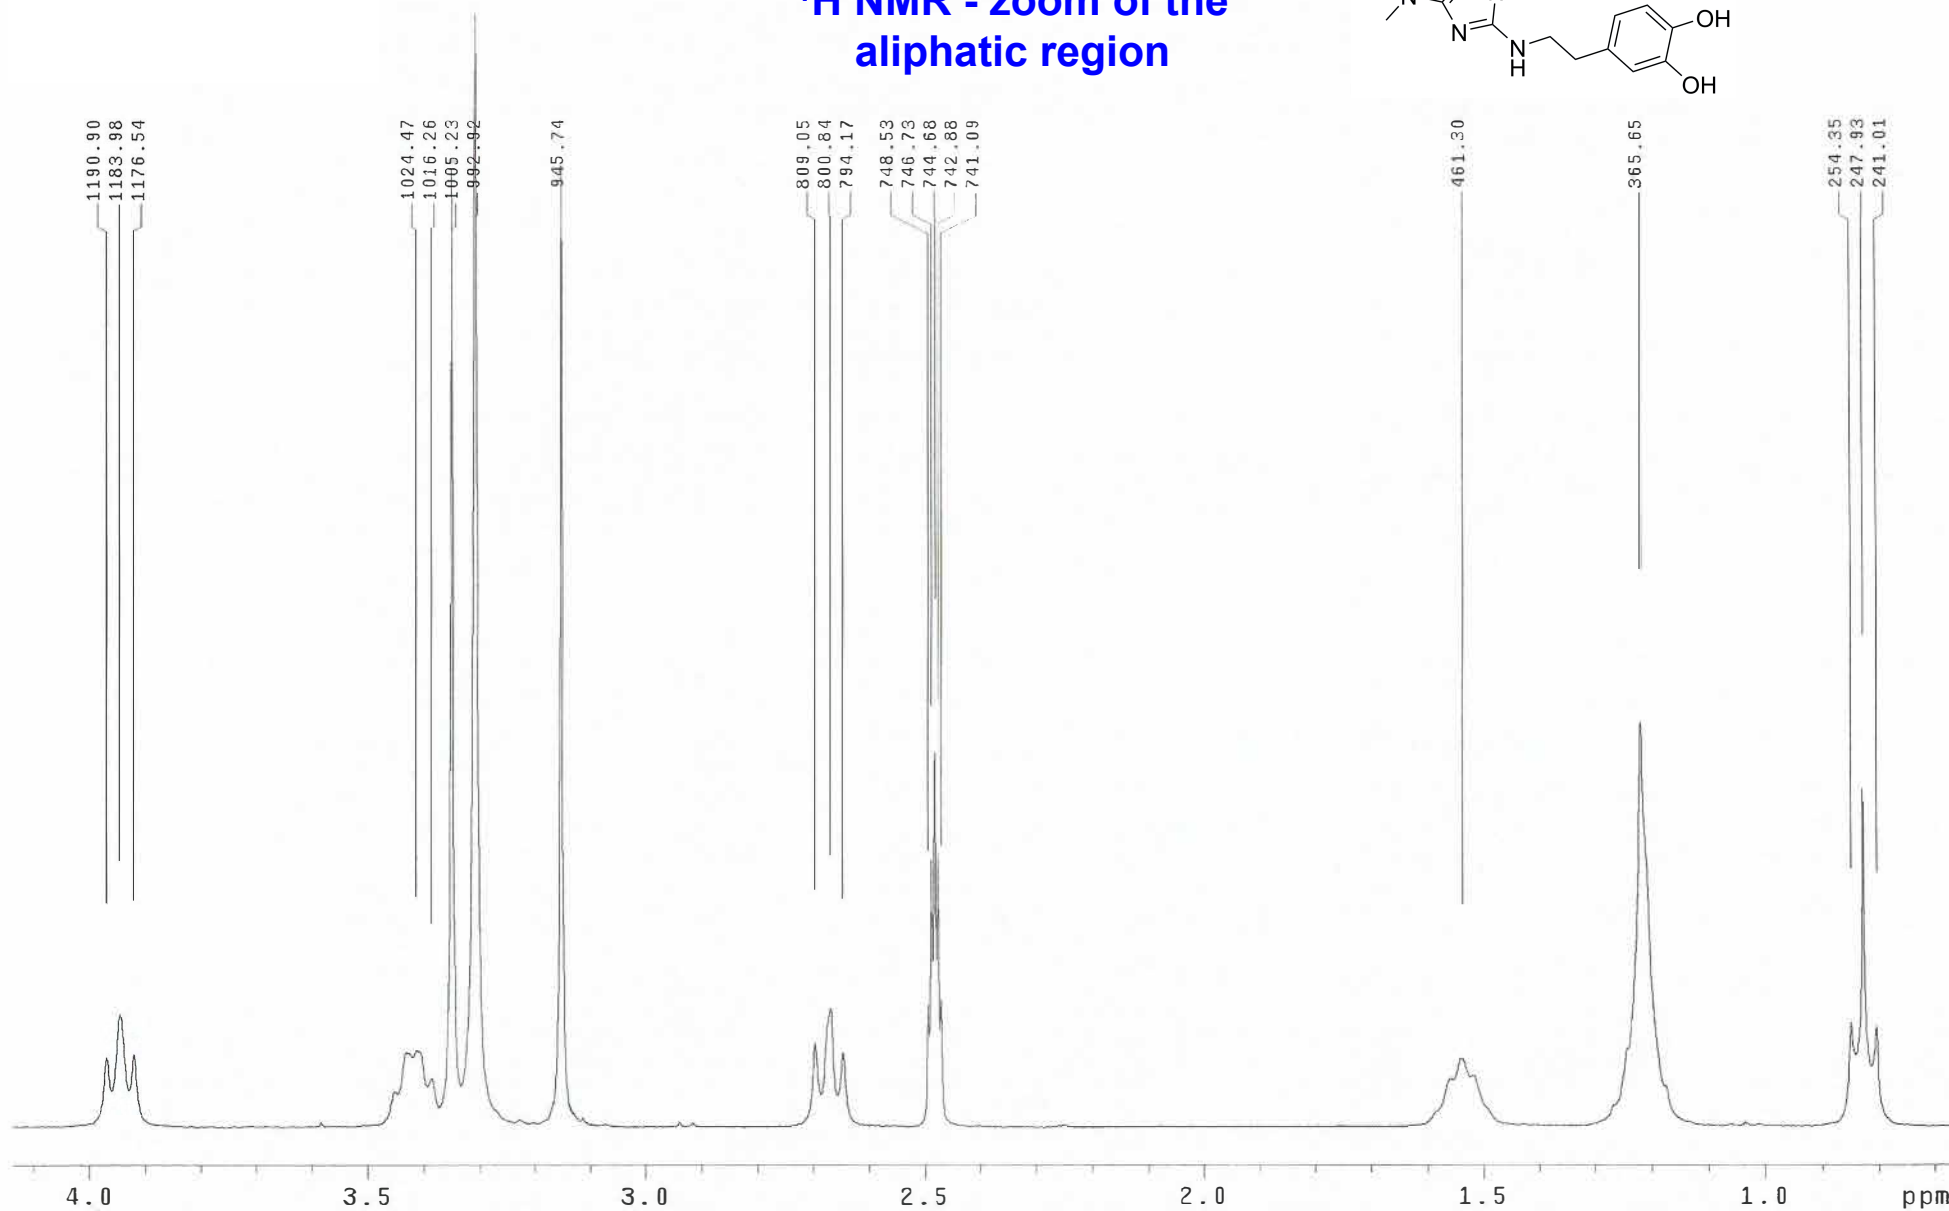

**Compound 11i**  
 **$^1\text{H}$  NMR - zoom of the**  
**aromatic region**

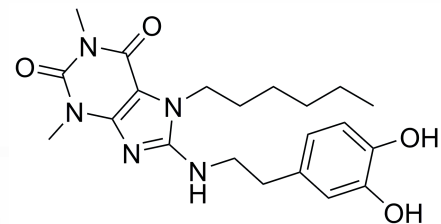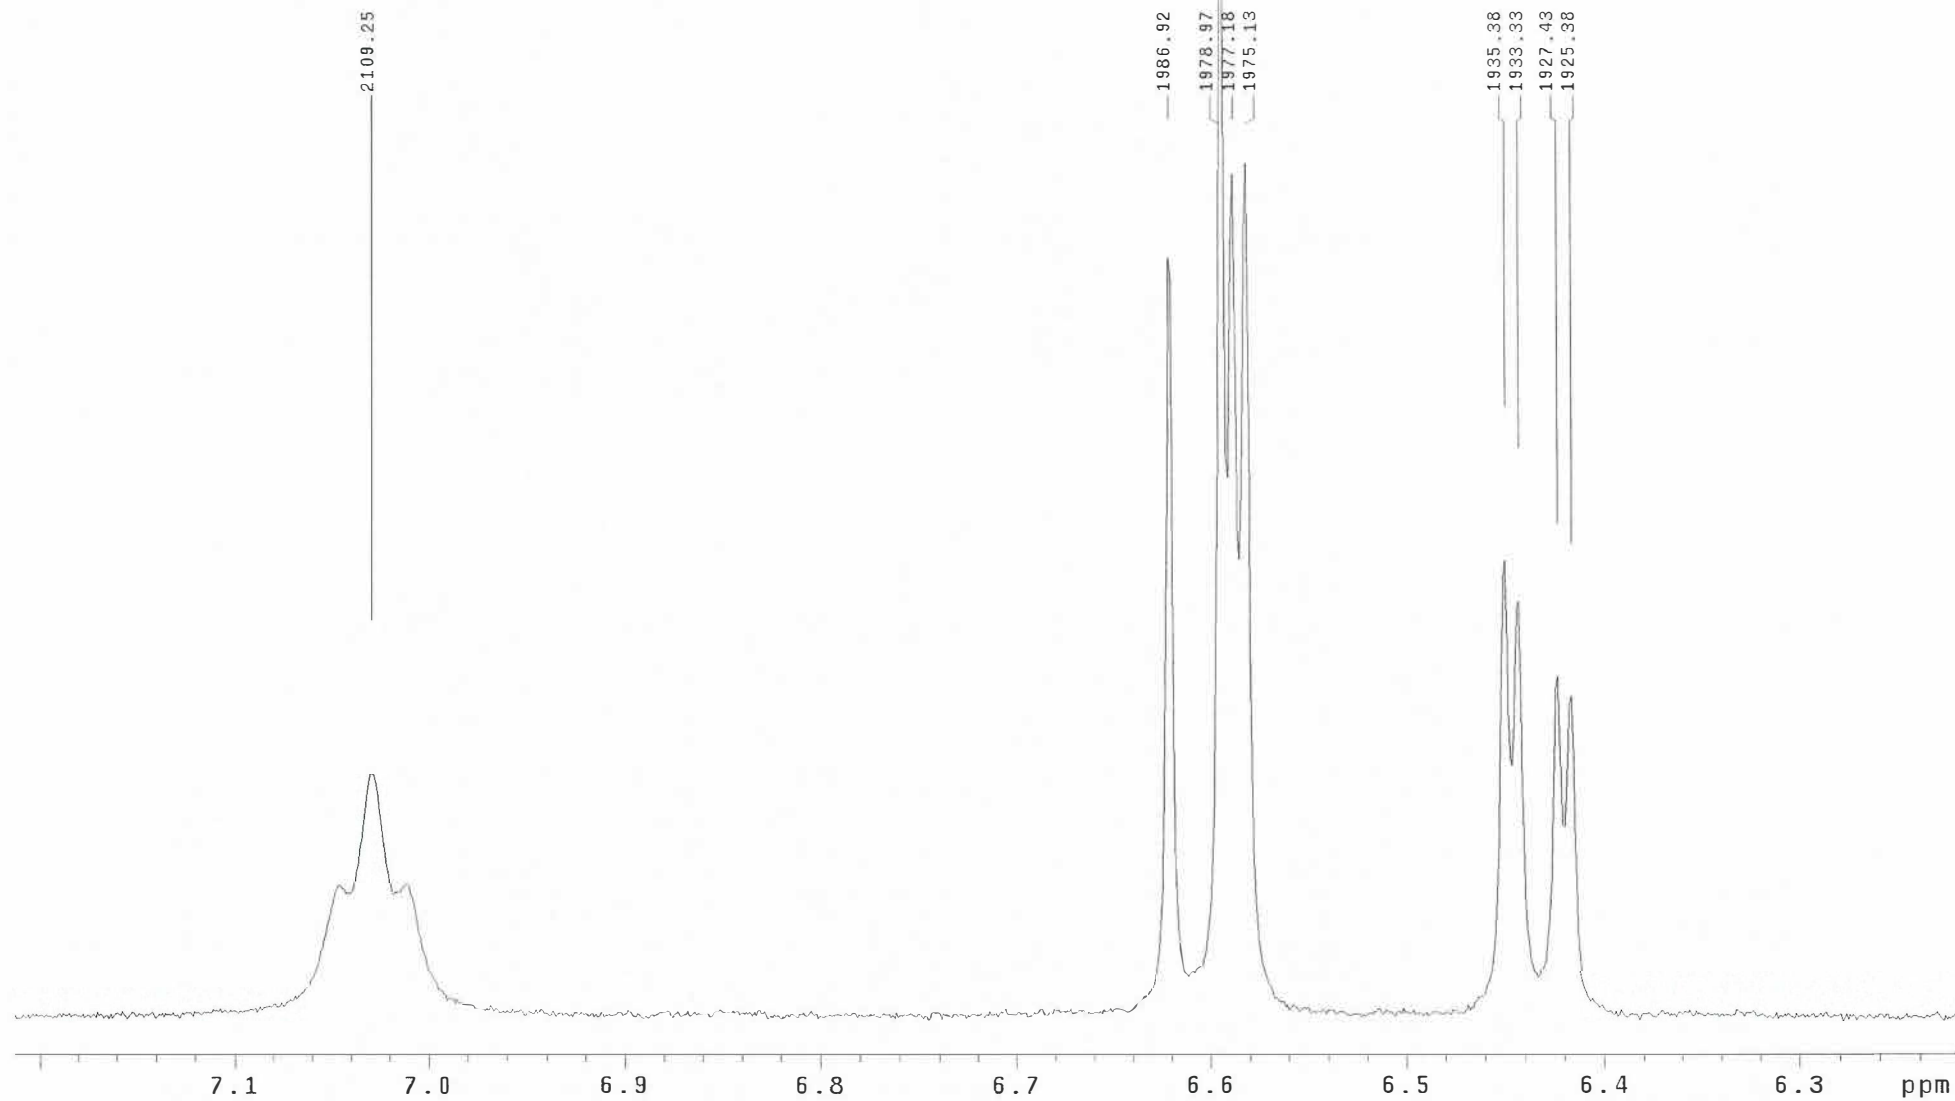

## Table of peaks

| INDEX | FREQUENCY | PPM   | HEIGHT |
|-------|-----------|-------|--------|
| 1     | 2600.353  | 8.666 | 7.4    |
| 2     | 2109.251  | 7.029 | 7.3    |
| 3     | 2104.122  | 7.012 | 4.0    |
| 4     | 1986.924  | 6.621 | 22.8   |
| 5     | 1978.974  | 6.595 | 33.3   |
| 6     | 1977.179  | 6.589 | 25.3   |
| 7     | 1975.127  | 6.582 | 25.6   |
| 8     | 1935.377  | 6.450 | 13.7   |
| 9     | 1933.326  | 6.443 | 12.5   |
| 10    | 1927.427  | 6.423 | 10.2   |
| 11    | 1925.376  | 6.416 | 9.6    |
| 12    | 1190.902  | 3.969 | 9.1    |
| 13    | 1183.978  | 3.946 | 14.6   |
| 14    | 1176.541  | 3.921 | 9.4    |
| 15    | 1036.006  | 3.452 | 4.6    |
| 16    | 1029.595  | 3.431 | 9.7    |
| 17    | 1021.902  | 3.405 | 9.6    |
| 18    | 1016.260  | 3.387 | 6.3    |
| 19    | 1005.232  | 3.350 | 124.0  |
| 20    | 992.923   | 3.309 | 144.0  |
| 21    | 945.736   | 3.152 | 124.4  |
| 22    | 809.048   | 2.696 | 10.8   |
| 23    | 800.841   | 2.669 | 15.2   |
| 24    | 794.174   | 2.647 | 9.7    |
| 25    | 748.526   | 2.494 | 15.7   |
| 26    | 746.730   | 2.488 | 34.6   |
| 27    | 744.679   | 2.482 | 48.5   |
| 28    | 742.884   | 2.476 | 35.3   |
| 29    | 741.089   | 2.470 | 16.4   |
| 30    | 461.301   | 1.537 | 8.8    |
| 31    | 365.645   | 1.218 | 52.4   |
| 32    | 254.346   | 0.848 | 13.5   |
| 33    | 247.935   | 0.826 | 43.8   |
| 34    | 241.011   | 0.803 | 13.0   |

# Compound 11i

## <sup>13</sup>C NMR

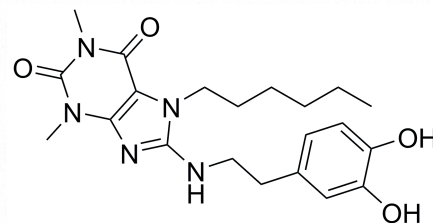

| No. | (ppm)  | (Hz)    | Height |
|-----|--------|---------|--------|
| 1   | 14.34  | 1442.7  | 0.1584 |
| 2   | 22.49  | 2263.6  | 0.1434 |
| 3   | 25.89  | 2605.4  | 0.1005 |
| 4   | 27.65  | 2783.0  | 0.0934 |
| 5   | 29.49  | 2967.8  | 0.0731 |
| 6   | 29.71  | 2989.8  | 0.1046 |
| 7   | 31.32  | 3152.0  | 0.1243 |
| 8   | 35.23  | 3545.2  | 0.0659 |
| 9   | 39.34  | 3958.9  | 0.1306 |
| 10  | 39.54  | 3979.5  | 0.4177 |
| 11  | 39.76  | 4000.7  | 0.8501 |
| 12  | 39.97  | 4022.0  | 1.0000 |
| 13  | 40.17  | 4042.6  | 0.8434 |
| 14  | 40.38  | 4063.8  | 0.4184 |
| 15  | 40.59  | 4084.4  | 0.1324 |
| 16  | 42.82  | 4308.9  | 0.0473 |
| 17  | 44.90  | 4517.9  | 0.0624 |
| 18  | 101.81 | 10245.1 | 0.0601 |
| 19  | 115.87 | 11660.2 | 0.0833 |
| 20  | 116.52 | 11725.5 | 0.0873 |
| 21  | 119.78 | 12053.4 | 0.0763 |
| 22  | 130.56 | 13138.4 | 0.0608 |
| 23  | 144.00 | 14491.2 | 0.0697 |
| 24  | 145.53 | 14645.2 | 0.0952 |
| 25  | 149.03 | 14997.3 | 0.0556 |
| 26  | 151.44 | 15240.2 | 0.0507 |
| 27  | 153.02 | 15398.6 | 0.0607 |
| 28  | 153.67 | 15464.6 | 0.0712 |

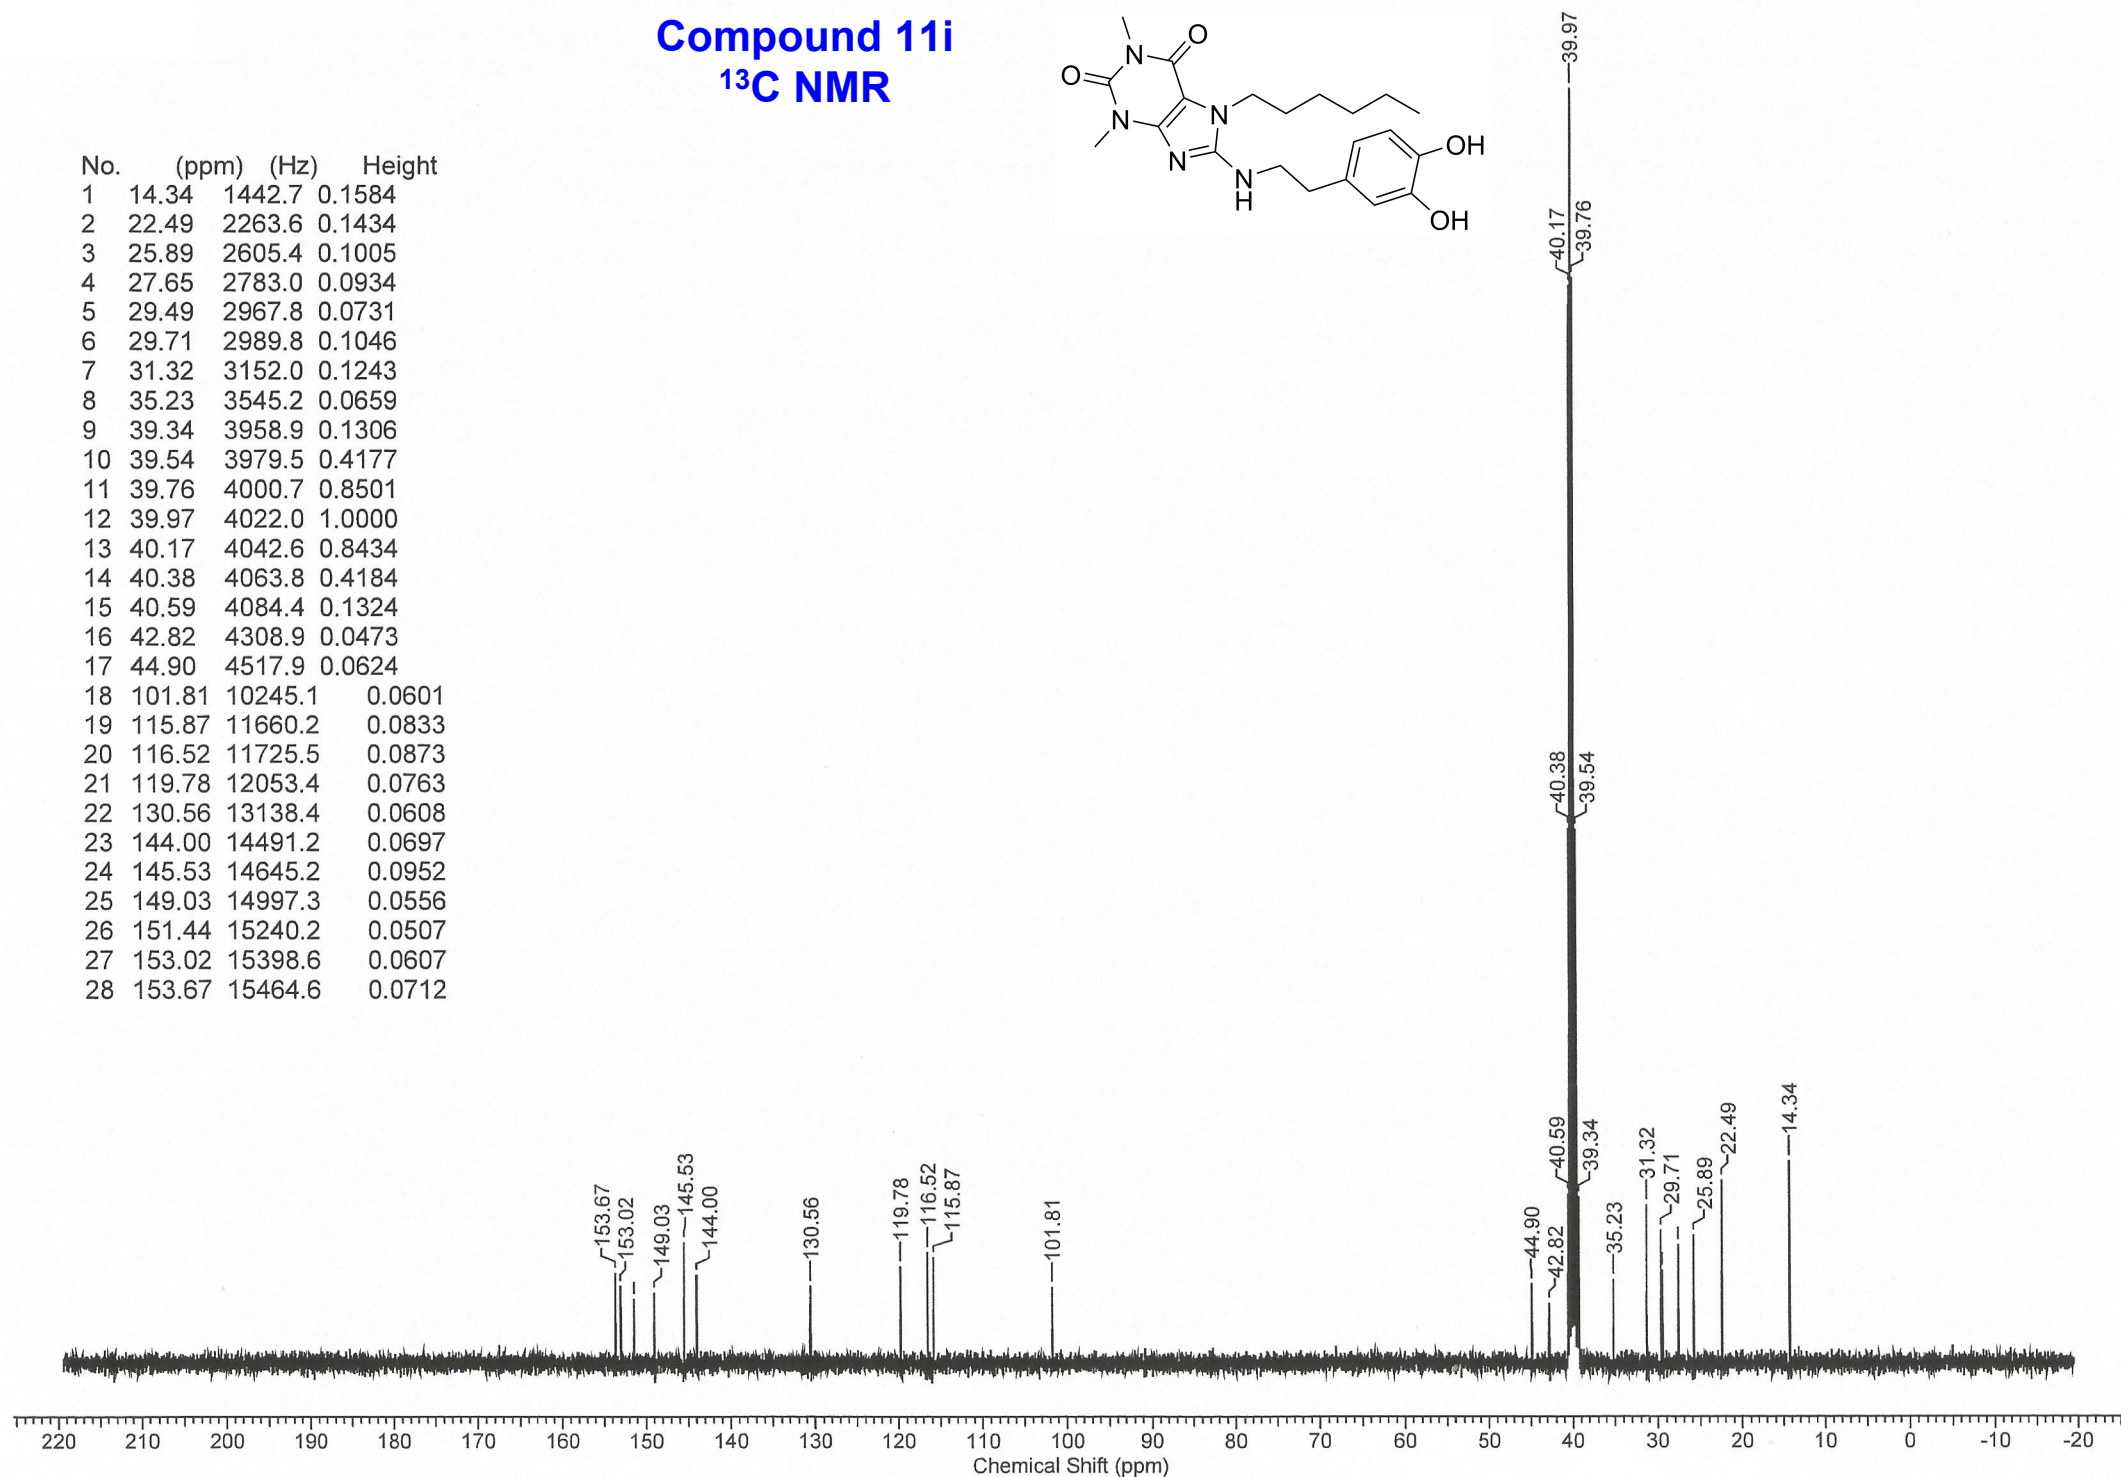

7-ethyl-6-(2,4-dihydroxyphenyl)-1,3-dimethyl-2-oxo-1,2,3,4-tetrahydropyrimidin-4-yl

**Compound 11j**  
**<sup>1</sup>H NMR**

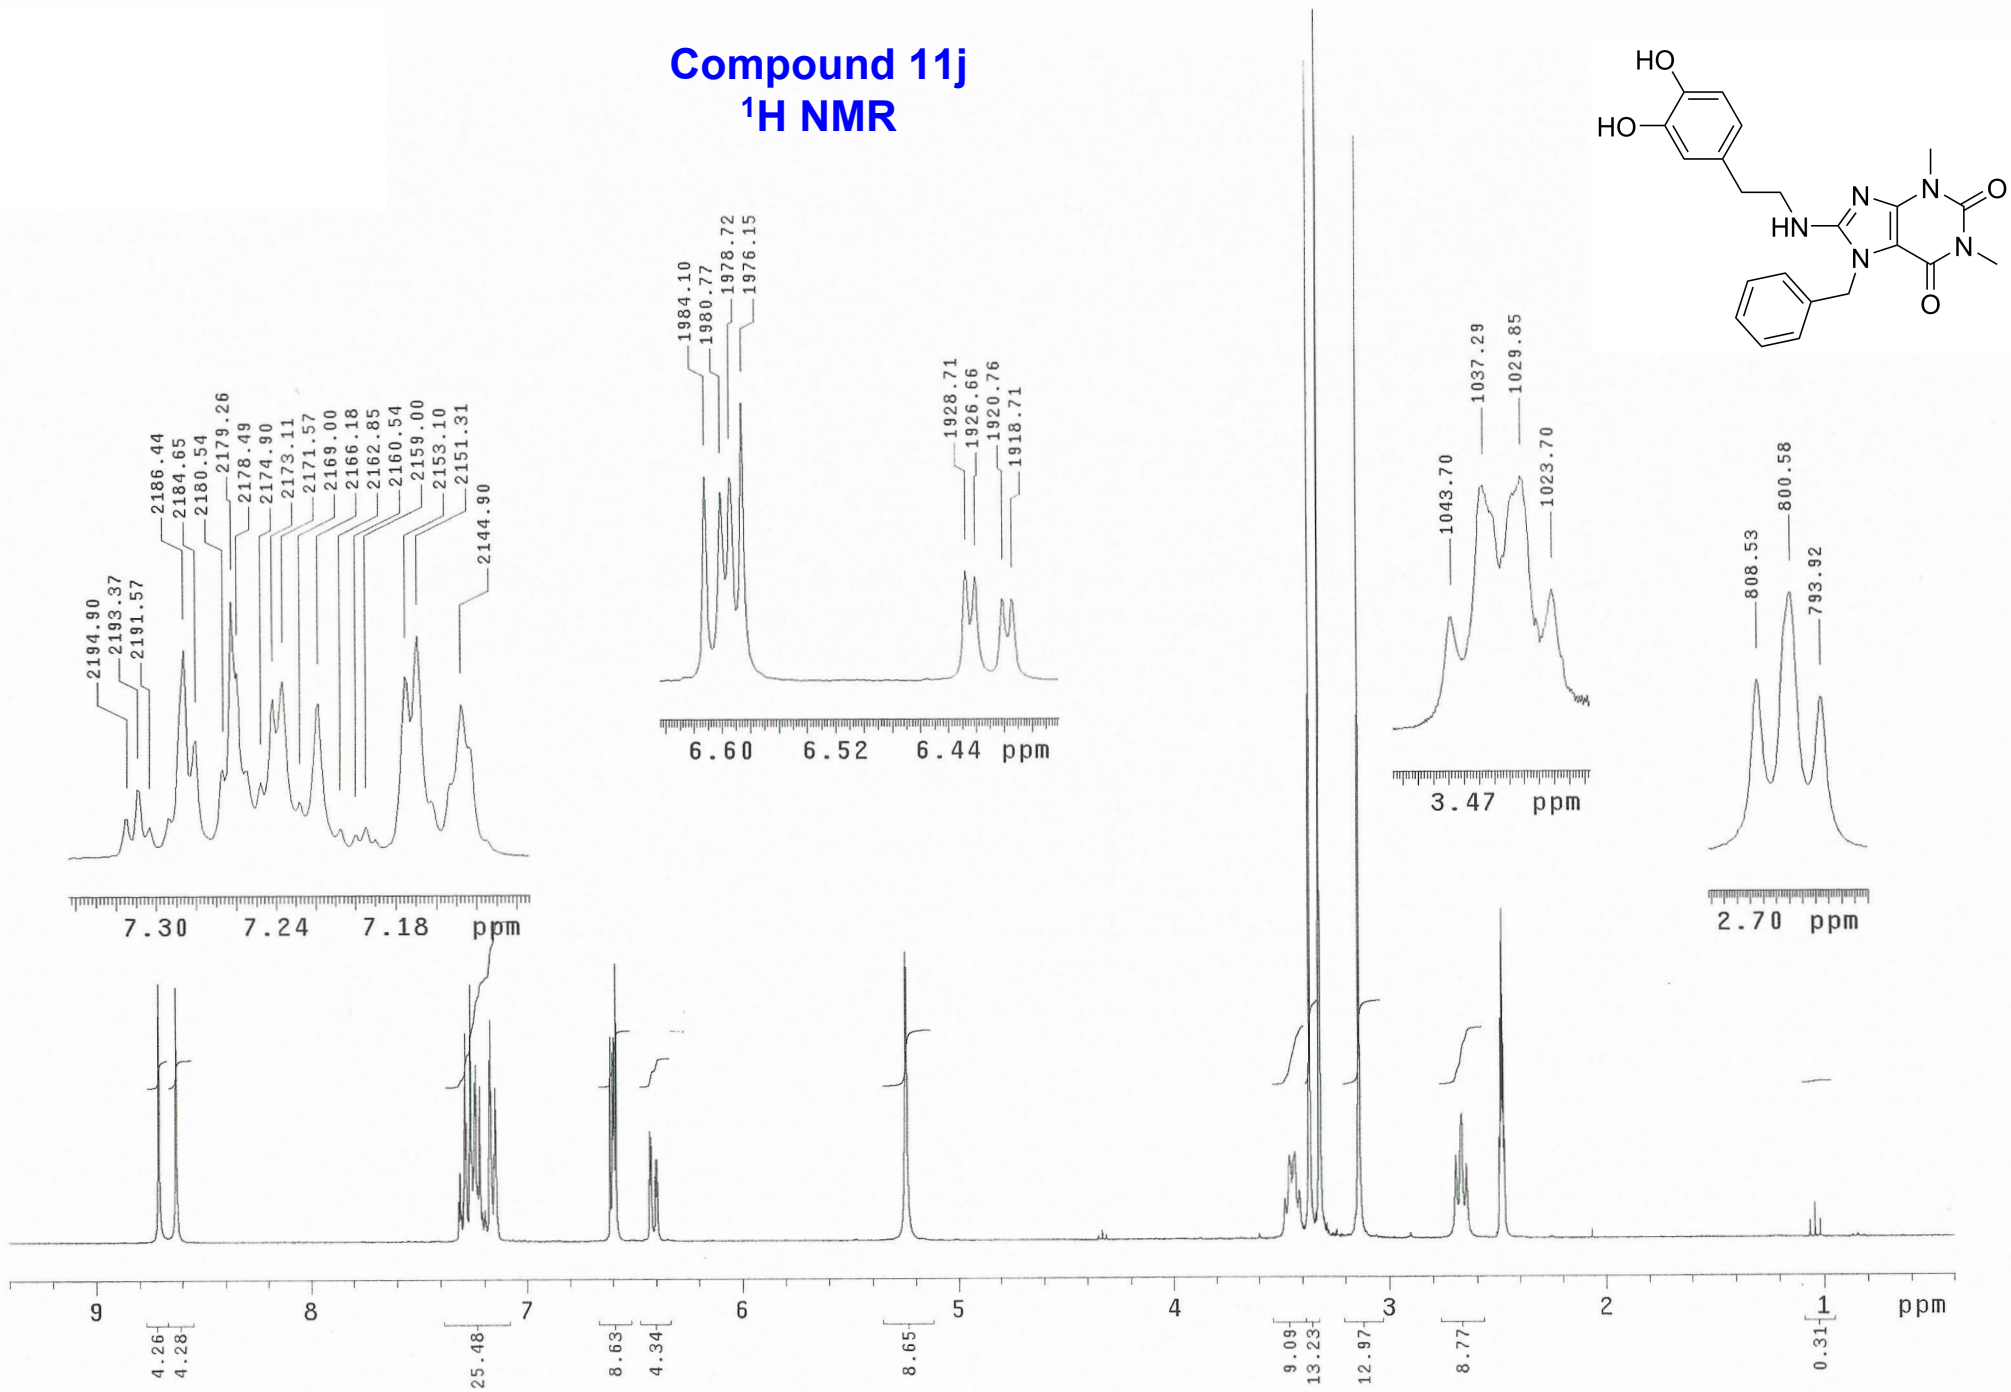

## Table of peaks

| INDEX | FREQUENCY           | PPM              | HEIGHT         | INDEX | FREQUENCY | PPM   | HEIGHT |
|-------|---------------------|------------------|----------------|-------|-----------|-------|--------|
| 1     | 2613.688            | 8.710            | 33.6           | 40    | 1014.208  | 3.380 | 2.8    |
| 2     | 2589.582            | 8.630            | 33.1           | 41    | 1013.695  | 3.378 | 3.1    |
| 3     | 2194.905            | 7.314            | 5.1            | 42    | 1009.592  | 3.364 | 152.9  |
| 4     | 2193.366            | 7.309            | 9.0            | 43    | 1004.719  | 3.348 | 3.4    |
| 5     | 2191.571            | 7.303            | 4.1            | 44    | 1001.898  | 3.339 | 2.5    |
| 6     | 2188.494            | 7.293            | 5.1            | 45    | 1000.873  | 3.335 | 3.1    |
| 7     | 2186.442            | 7.286            | 27.1           | 46    | 1000.360  | 3.334 | 3.4    |
| 8     | 2184.647            | 7.280            | 15.4           | 47    | 999.847   | 3.332 | 3.4    |
| 9     | 2180.544            | 7.267            | 11.5           | 48    | 999.334   | 3.330 | 3.8    |
| 10    | 2179.261            | 7.262            | 33.4           | 49    | 998.821   | 3.329 | 5.4    |
| 11    | 2178.492            | 7.260            | 24.1           | 50    | 998.308   | 3.327 | 7.6    |
| 12    | 2176.953            | 7.255            | 11.4           | 51    | 996.257   | 3.320 | 438.3  |
| 13    | 2174.902            | 7.248            | 9.8            | 52    | 990.102   | 3.299 | 2.8    |
| 14    | 2173.107            | 7.242            | 20.7           | 53    | 989.589   | 3.298 | 2.7    |
| 15    | 2171.568            | 7.237            | 23.0           | 54    | 989.076   | 3.296 | 2.6    |
| 16    | 2169.003            | 7.228            | 7.3            | 55    | 946.762   | 3.155 | 2.7    |
| 17    | 2166.183            | 7.219            | 20.2           | 56    | 941.633   | 3.138 | 143.0  |
| 18    | 2162.849            | 7.208            | 3.8            | 57    | 808.535   | 2.694 | 10.8   |
| 19    | 2160.541            | 7.200            | 3.0            | 58    | 800.585   | 2.668 | 16.2   |
| 20    | 2159.002            | 7.195            | 4.0            | 59    | 793.917   | 2.646 | 9.7    |
| 21    | 2153.104            | 7.175            | 23.6           | 60    | 748.782   | 2.495 | 13.1   |
| 22    | 2151.308            | 7.169            | 28.8           | 61    | 746.730   | 2.488 | 28.6   |
| 23    | 2149.257            | 7.162            | 7.3            | 62    | 744.935   | 2.482 | 42.7   |
| 24    | 2146.436            | 7.153            | 9.7            | 63    | 743.140   | 2.476 | 31.6   |
| 25    | 2144.897            | 7.148            | 19.9           | 64    | 741.345   | 2.470 | 14.5   |
| 26    | 1984.103            | 6.612            | 26.5           | 65    | 311.534   | 1.038 | 4.4    |
| 27    | 1980.769            | 6.601            | 24.5           |       |           |       |        |
| 28    | 1978.717            | 6.594            | 26.4           |       |           |       |        |
| 29    | 1976.153            | 6.585            | 35.9           |       |           |       |        |
| 30    | 1928.710            | 6.427            | 14.2           |       |           |       |        |
| 31    | 1926.658            | 6.420            | 13.5           |       |           |       |        |
| 32    | 1920.760            | 6.401            | 10.6           |       |           |       |        |
| 33    | 1918.708            | 6.394            | 10.6           |       |           |       |        |
| 34    | 1574.039            | 5.245            | 37.5           |       |           |       |        |
| 35    | 1043.700            | 3.478            | 5.1            |       |           |       |        |
| 36    | 1037.289            | 3.457            | 10.8           |       |           |       |        |
| 37    | 1029.852            | 3.432            | 11.2           |       |           |       |        |
| 38    | <del>1026.774</del> | <del>3.422</del> | <del>5.0</del> |       |           |       |        |
| 39    | 1023.697            | 3.411            | 6.3            |       |           |       |        |

# Compound 11j

## <sup>13</sup>C NMR

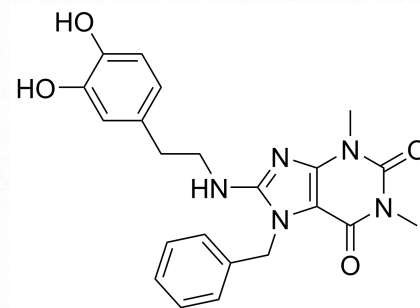

| No. | (ppm)  | (Hz)    | Height |
|-----|--------|---------|--------|
| 1   | 27.65  | 2783.0  | 0.0902 |
| 2   | 29.76  | 2995.0  | 0.1076 |
| 3   | 35.09  | 3531.2  | 0.0666 |
| 4   | 39.35  | 3960.4  | 0.1371 |
| 5   | 39.56  | 3980.9  | 0.4337 |
| 6   | 39.77  | 4002.2  | 0.8719 |
| 7   | 39.97  | 4022.8  | 1.0000 |
| 8   | 40.19  | 4044.0  | 0.8765 |
| 9   | 40.40  | 4065.3  | 0.4349 |
| 10  | 40.60  | 4085.8  | 0.1423 |
| 11  | 44.90  | 4518.7  | 0.0612 |
| 12  | 45.71  | 4600.1  | 0.0488 |
| 13  | 101.68 | 10231.9 | 0.0656 |
| 14  | 115.91 | 11664.6 | 0.0826 |
| 15  | 116.53 | 11727.0 | 0.0887 |
| 16  | 119.83 | 12058.6 | 0.0848 |
| 17  | 127.54 | 12834.7 | 0.2572 |
| 18  | 127.74 | 12854.5 | 0.0691 |
| 19  | 128.92 | 12973.4 | 0.2653 |
| 20  | 130.46 | 13128.9 | 0.0748 |
| 21  | 137.53 | 13840.5 | 0.0809 |
| 22  | 144.01 | 14491.9 | 0.0738 |
| 23  | 145.53 | 14645.2 | 0.1022 |
| 24  | 149.30 | 15024.5 | 0.0607 |
| 25  | 151.44 | 15239.4 | 0.0564 |
| 26  | 153.19 | 15416.2 | 0.0592 |
| 27  | 154.13 | 15510.1 | 0.0825 |

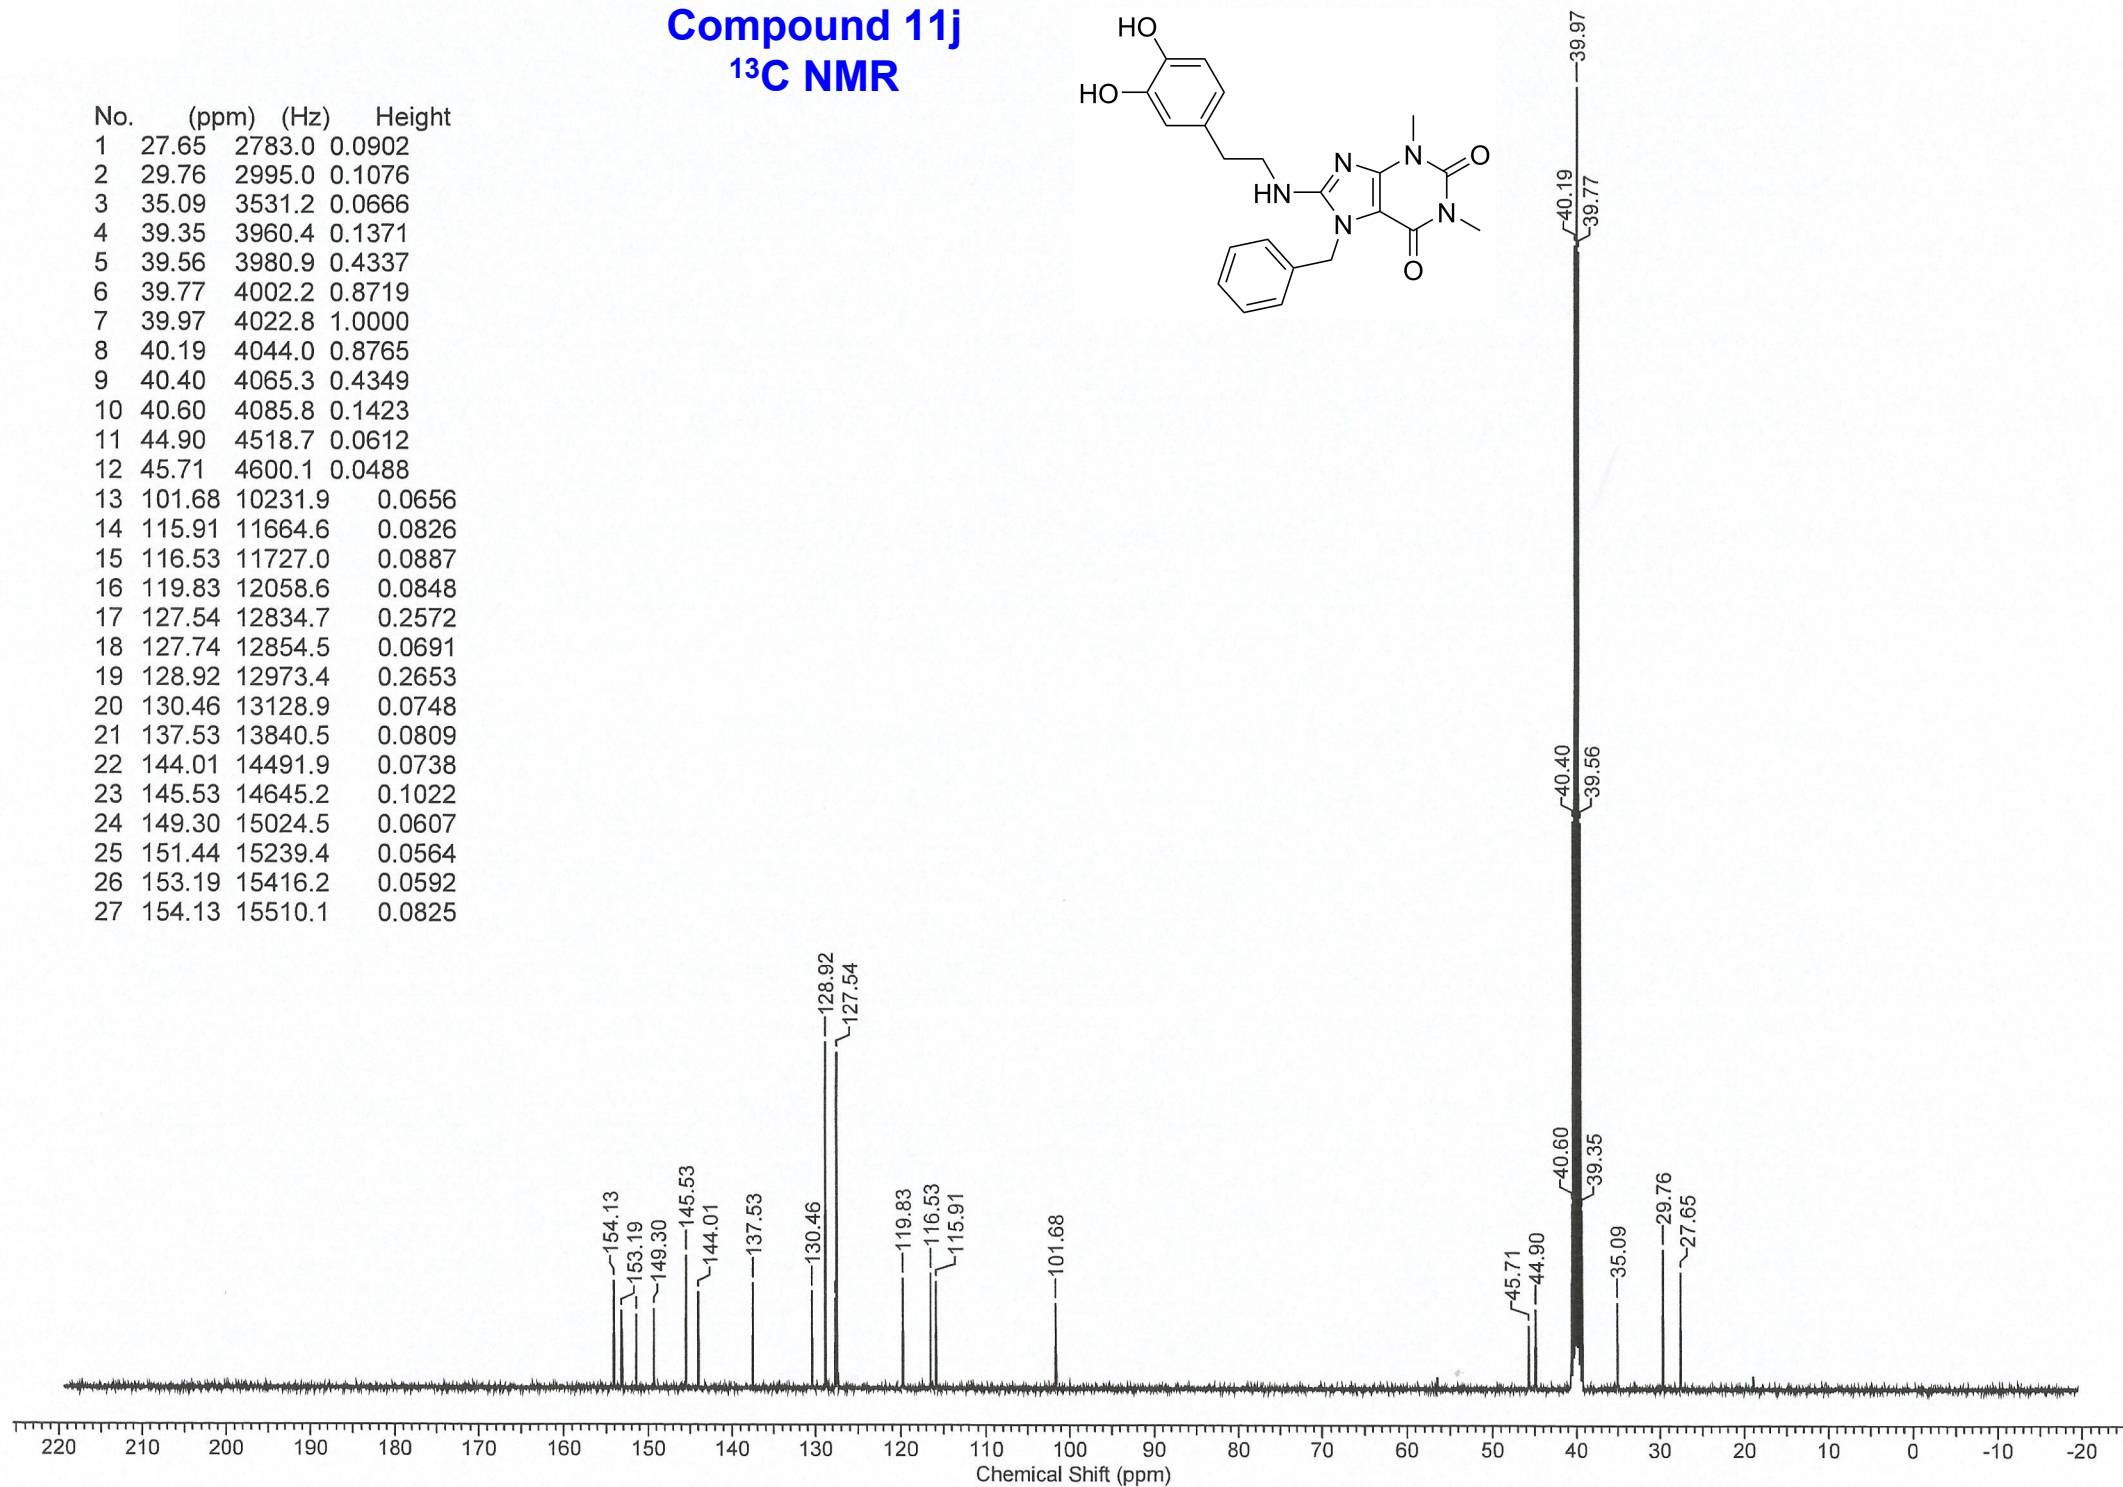

**Compound 11k**  
**<sup>1</sup>H NMR**

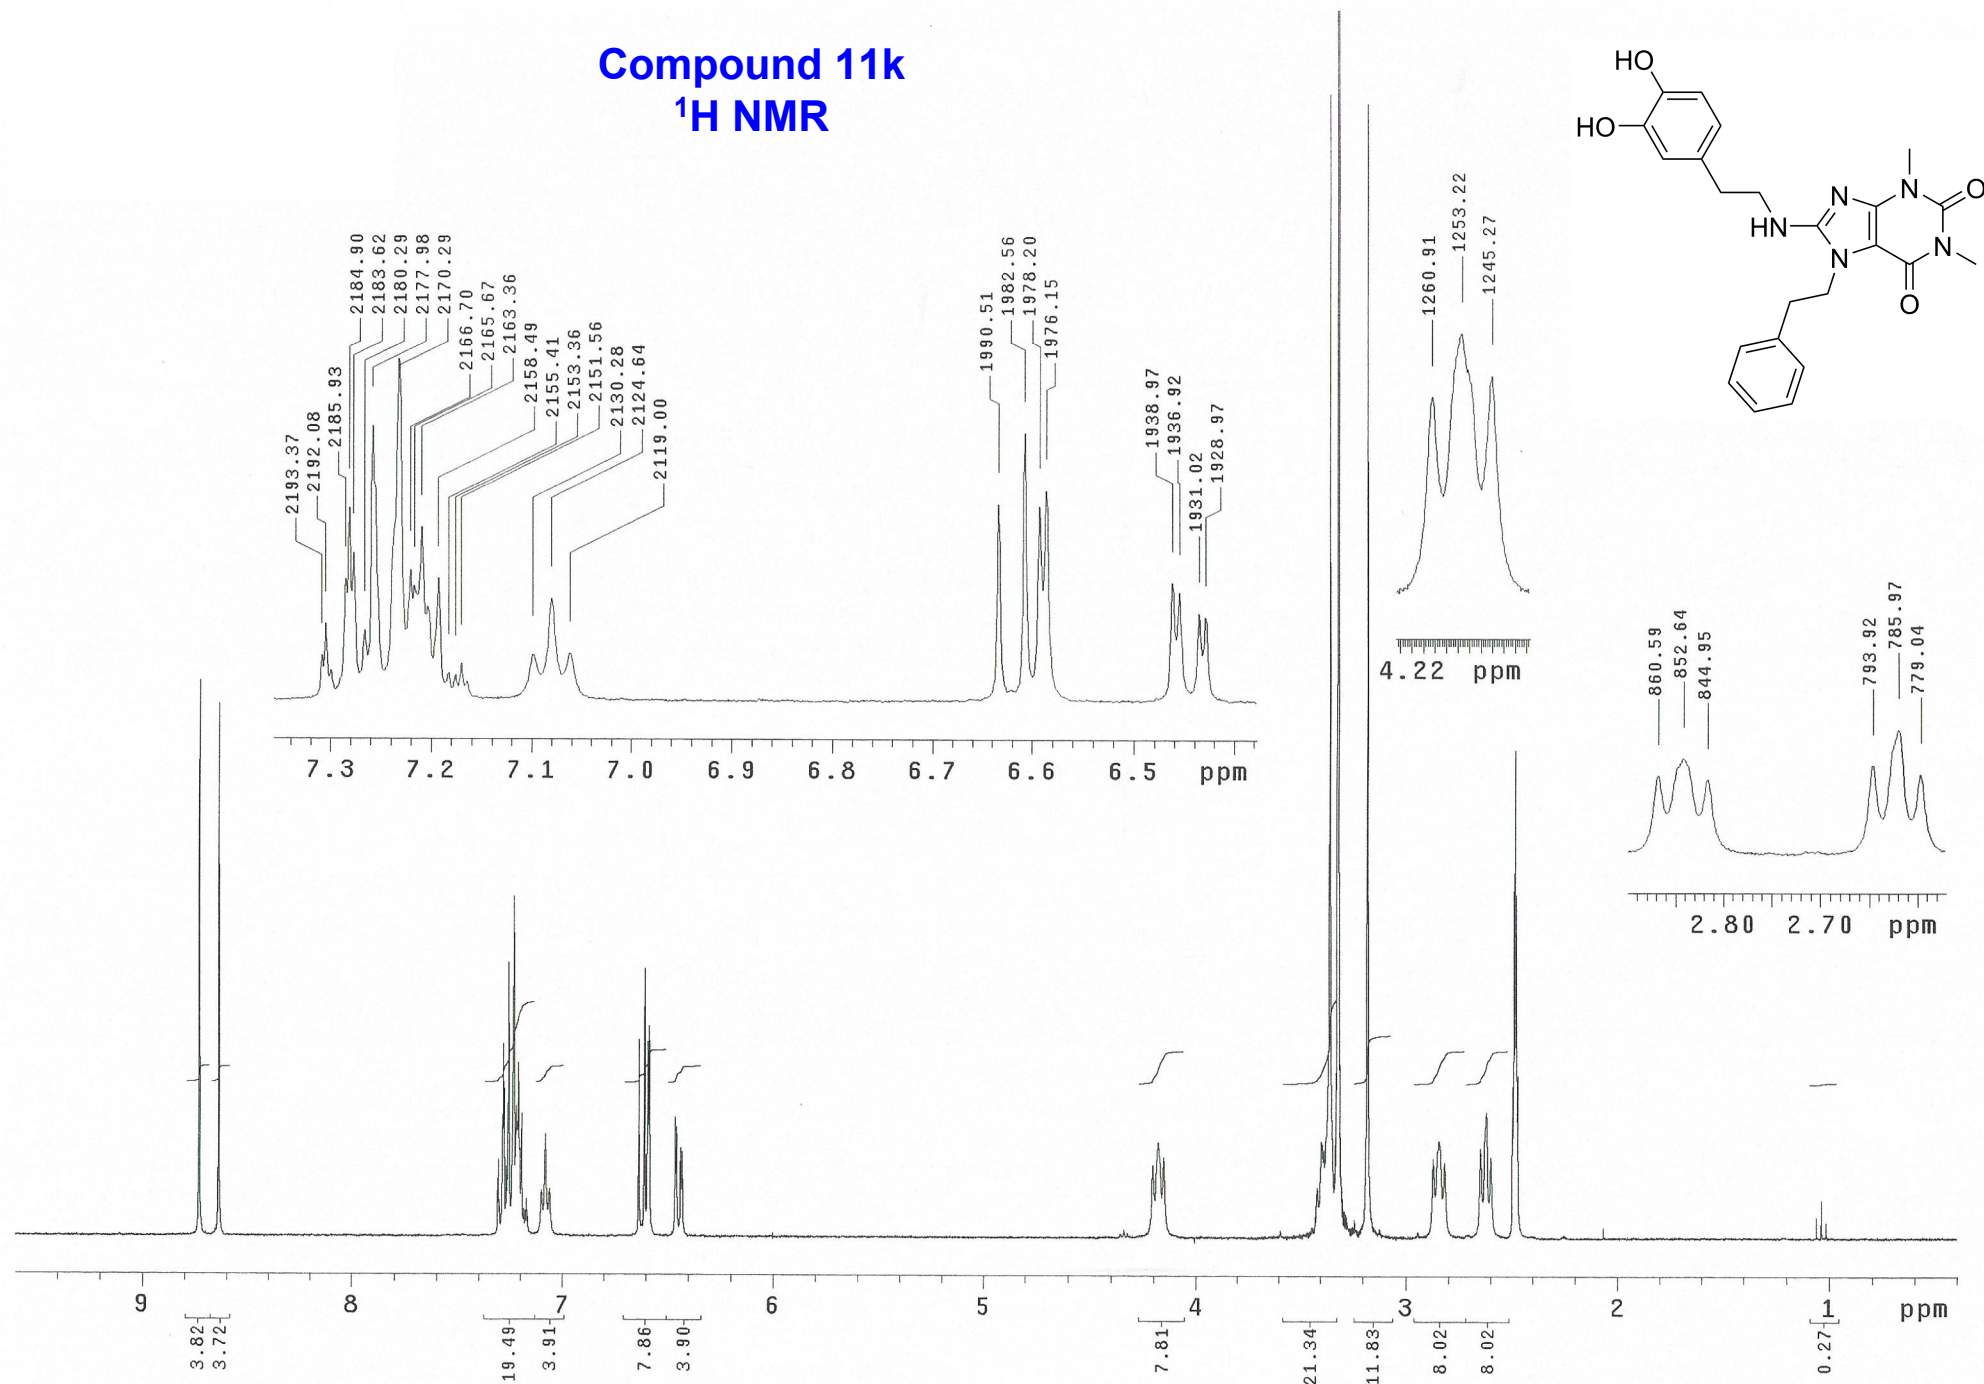

## Table of peaks

| INDEX | FREQUENCY | PPM   | HEIGHT | INDEX | FREQUENCY | PPM   | HEIGHT | INDEX | FREQUENCY | PPM   | HEIGHT |
|-------|-----------|-------|--------|-------|-----------|-------|--------|-------|-----------|-------|--------|
| 1     | 2619.843  | 8.730 | 72.3   | 40    | 1016.516  | 3.387 | 11.0   | 79    | 742.884   | 2.476 | 44.6   |
| 2     | 2592.146  | 8.638 | 69.3   | 41    | 1016.003  | 3.386 | 11.1   | 80    | 741.089   | 2.470 | 21.1   |
| 3     | 2193.366  | 7.309 | 5.9    | 42    | 1015.490  | 3.384 | 11.4   | 81    | 317.689   | 1.059 | 2.7    |
| 4     | 2192.084  | 7.305 | 10.0   | 43    | 1014.977  | 3.382 | 10.6   | 82    | 310.765   | 1.036 | 4.9    |
| 5     | 2190.545  | 7.300 | 3.9    | 44    | 1014.464  | 3.381 | 10.1   |       |           |       |        |
| 6     | 2185.929  | 7.284 | 15.8   | 45    | 1007.284  | 3.357 | 148.5  |       |           |       |        |
| 7     | 2184.903  | 7.281 | 25.0   | 46    | 1001.129  | 3.336 | 6.9    |       |           |       |        |
| 8     | 2183.621  | 7.277 | 19.2   | 47    | 1000.616  | 3.334 | 7.6    |       |           |       |        |
| 9     | 2180.287  | 7.266 | 9.1    | 48    | 1000.103  | 3.333 | 8.3    |       |           |       |        |
| 10    | 2177.979  | 7.258 | 35.5   | 49    | 999.590   | 3.331 | 9.6    |       |           |       |        |
| 11    | 2170.286  | 7.232 | 44.2   | 50    | 999.077   | 3.329 | 12.0   |       |           |       |        |
| 12    | 2166.695  | 7.220 | 16.9   | 51    | 998.565   | 3.328 | 15.8   |       |           |       |        |
| 13    | 2165.670  | 7.217 | 14.9   | 52    | 998.052   | 3.326 | 21.4   |       |           |       |        |
| 14    | 2163.362  | 7.209 | 22.5   | 53    | 996.000   | 3.319 | 1106.3 |       |           |       |        |
| 15    | 2161.566  | 7.203 | 12.2   | 54    | 993.179   | 3.310 | 22.5   |       |           |       |        |
| 16    | 2158.489  | 7.193 | 15.9   | 55    | 992.666   | 3.308 | 16.8   |       |           |       |        |
| 17    | 2155.412  | 7.183 | 3.6    | 56    | 989.845   | 3.299 | 6.5    |       |           |       |        |
| 18    | 2153.360  | 7.176 | 3.3    | 57    | 989.332   | 3.297 | 5.1    |       |           |       |        |
| 19    | 2151.565  | 7.170 | 4.8    | 58    | 988.819   | 3.295 | 4.6    |       |           |       |        |
| 20    | 2130.279  | 7.099 | 5.9    | 59    | 988.307   | 3.293 | 3.8    |       |           |       |        |
| 21    | 2124.638  | 7.080 | 13.3   | 60    | 987.794   | 3.292 | 3.3    |       |           |       |        |
| 22    | 2118.996  | 7.061 | 6.2    | 61    | 987.281   | 3.290 | 3.3    |       |           |       |        |
| 23    | 1990.514  | 6.633 | 25.6   | 62    | 986.768   | 3.288 | 3.4    |       |           |       |        |
| 24    | 1982.564  | 6.607 | 34.8   | 63    | 986.255   | 3.287 | 3.5    |       |           |       |        |
| 25    | 1978.204  | 6.592 | 25.3   | 64    | 985.742   | 3.285 | 3.2    |       |           |       |        |
| 26    | 1976.153  | 6.585 | 27.4   | 65    | 984.716   | 3.282 | 2.9    |       |           |       |        |
| 27    | 1938.968  | 6.461 | 15.5   | 66    | 984.203   | 3.280 | 3.1    |       |           |       |        |
| 28    | 1936.916  | 6.455 | 14.2   | 67    | 983.690   | 3.278 | 2.7    |       |           |       |        |
| 29    | 1931.018  | 6.435 | 11.6   | 68    | 953.942   | 3.179 | 147.3  |       |           |       |        |
| 30    | 1928.966  | 6.428 | 11.0   | 69    | 947.787   | 3.158 | 2.7    |       |           |       |        |
| 31    | 1260.913  | 4.202 | 9.4    | 70    | 860.594   | 2.868 | 10.3   |       |           |       |        |
| 32    | 1253.220  | 4.176 | 12.4   | 71    | 852.644   | 2.841 | 12.6   |       |           |       |        |
| 33    | 1245.270  | 4.150 | 10.4   | 72    | 844.951   | 2.816 | 9.8    |       |           |       |        |
| 34    | 1027.031  | 3.423 | 2.7    | 73    | 793.917   | 2.646 | 11.7   |       |           |       |        |
| 35    | 1024.466  | 3.414 | 6.6    | 74    | 785.967   | 2.619 | 16.4   |       |           |       |        |
| 36    | 1018.568  | 3.394 | 12.5   | 75    | 779.043   | 2.596 | 10.5   |       |           |       |        |
| 37    | 1018.055  | 3.393 | 12.3   | 76    | 748.526   | 2.494 | 19.6   |       |           |       |        |
| 38    | 1017.542  | 3.391 | 12.1   | 77    | 746.730   | 2.488 | 45.1   |       |           |       |        |
| 39    | 1017.029  | 3.389 | 11.7   | 78    | 744.935   | 2.482 | 63.5   |       |           |       |        |

# Compound 11k

## <sup>13</sup>C NMR

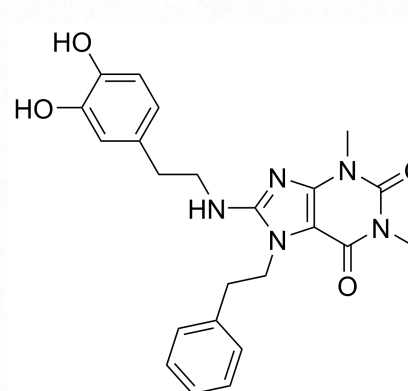

| No. | (ppm)  | (Hz)    | Height |
|-----|--------|---------|--------|
| 1   | 27.70  | 2787.4  | 0.0801 |
| 2   | 29.75  | 2994.2  | 0.0755 |
| 3   | 35.18  | 3540.0  | 0.0597 |
| 4   | 35.62  | 3584.8  | 0.0504 |
| 5   | 39.35  | 3960.4  | 0.1400 |
| 6   | 39.56  | 3980.9  | 0.4183 |
| 7   | 39.77  | 4002.2  | 0.8594 |
| 8   | 39.98  | 4023.5  | 1.0000 |
| 9   | 40.19  | 4044.0  | 0.8470 |
| 10  | 40.40  | 4065.3  | 0.4294 |
| 11  | 40.61  | 4086.6  | 0.1364 |
| 12  | 44.14  | 4441.6  | 0.0411 |
| 13  | 44.86  | 4514.3  | 0.0560 |
| 14  | 101.62 | 10226.0 | 0.0499 |
| 15  | 115.93 | 11666.1 | 0.0717 |
| 16  | 116.54 | 11727.7 | 0.0794 |
| 17  | 119.78 | 12054.2 | 0.0722 |
| 18  | 126.83 | 12763.5 | 0.0646 |
| 19  | 128.72 | 12953.5 | 0.1909 |
| 20  | 129.35 | 13016.6 | 0.1823 |
| 21  | 130.55 | 13137.7 | 0.0654 |
| 22  | 138.42 | 13930.0 | 0.0642 |
| 23  | 144.02 | 14493.4 | 0.0774 |
| 24  | 145.55 | 14646.7 | 0.0712 |
| 25  | 149.20 | 15014.2 | 0.0435 |
| 26  | 151.48 | 15243.8 | 0.0500 |
| 27  | 153.15 | 15411.8 | 0.0547 |
| 28  | 153.67 | 15463.9 | 0.0673 |

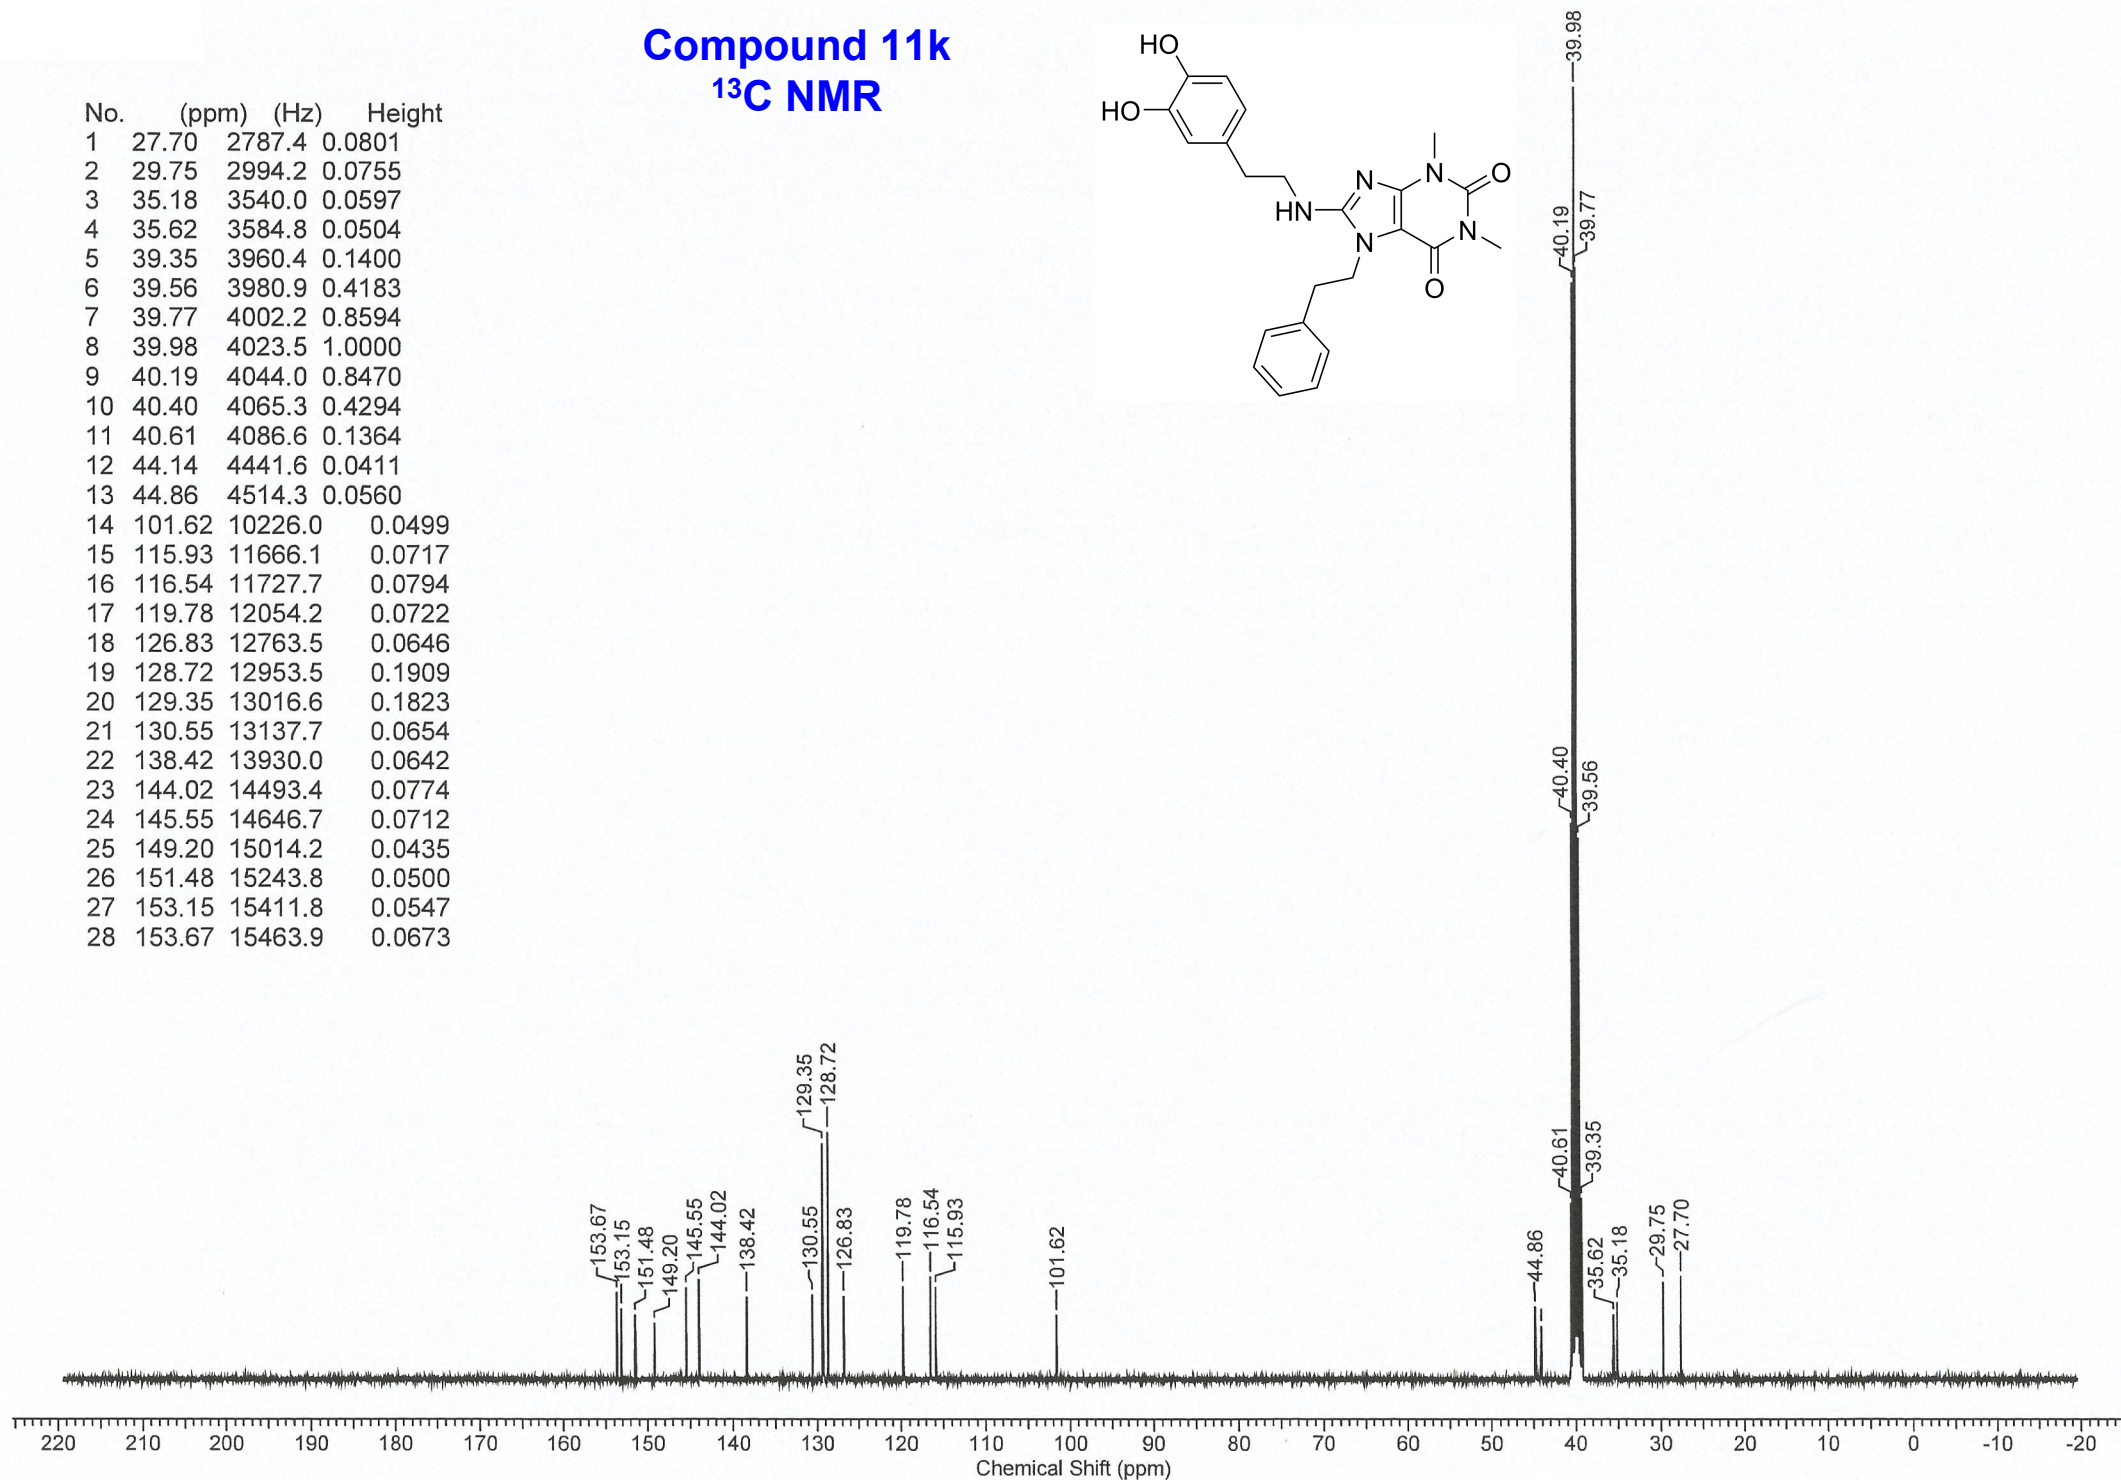

**Compound 11I**  
 **$^1\text{H}$  NMR**

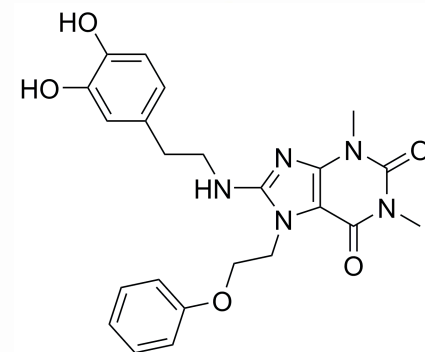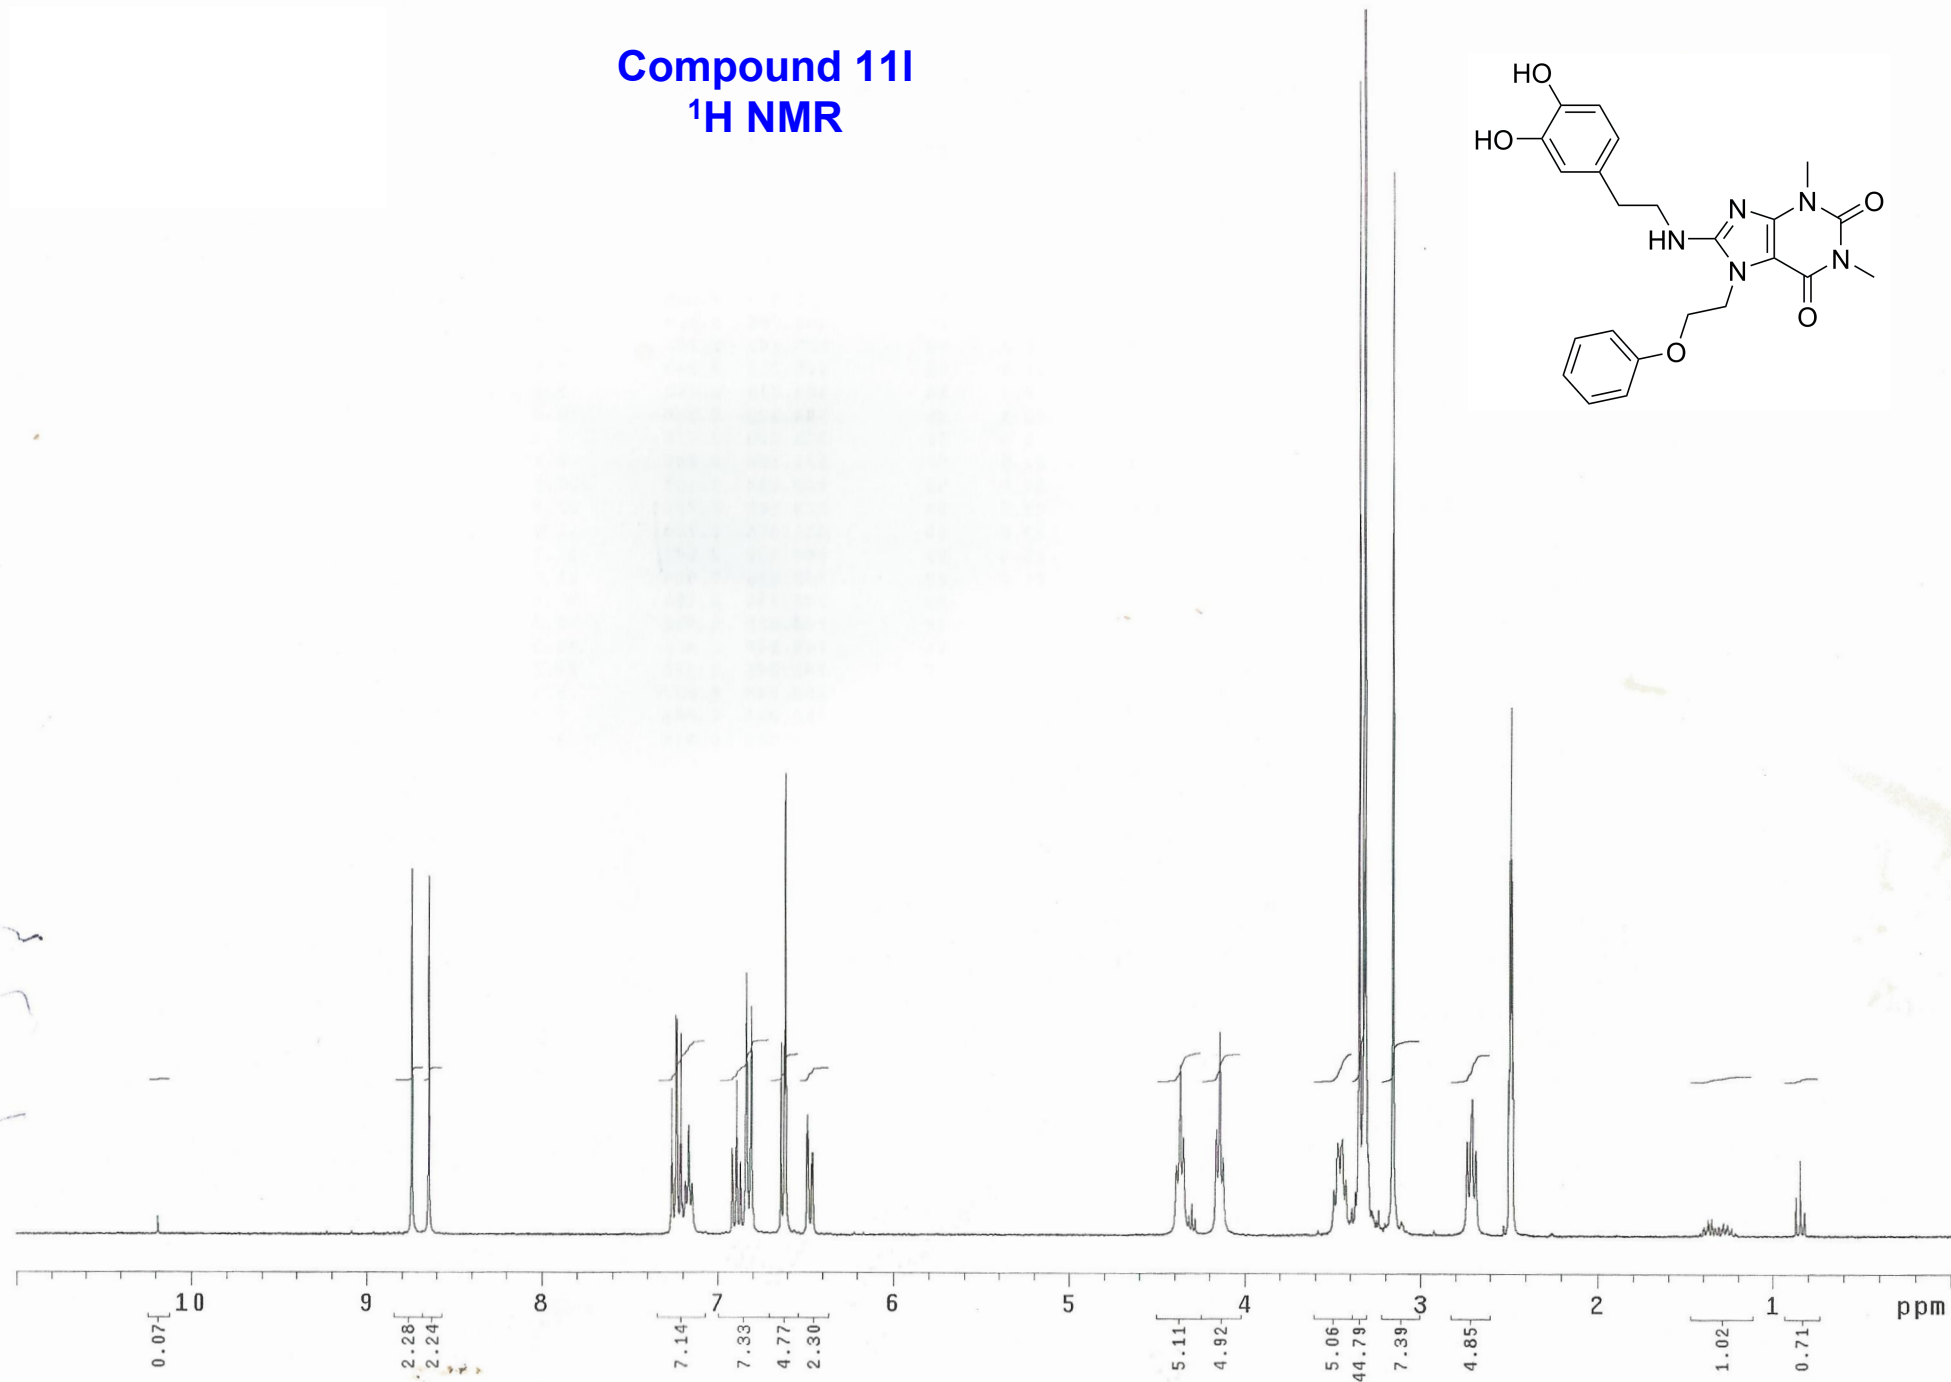

**Compound 11l**  
**<sup>1</sup>H NMR - zoom of the**  
**aliphatic region**

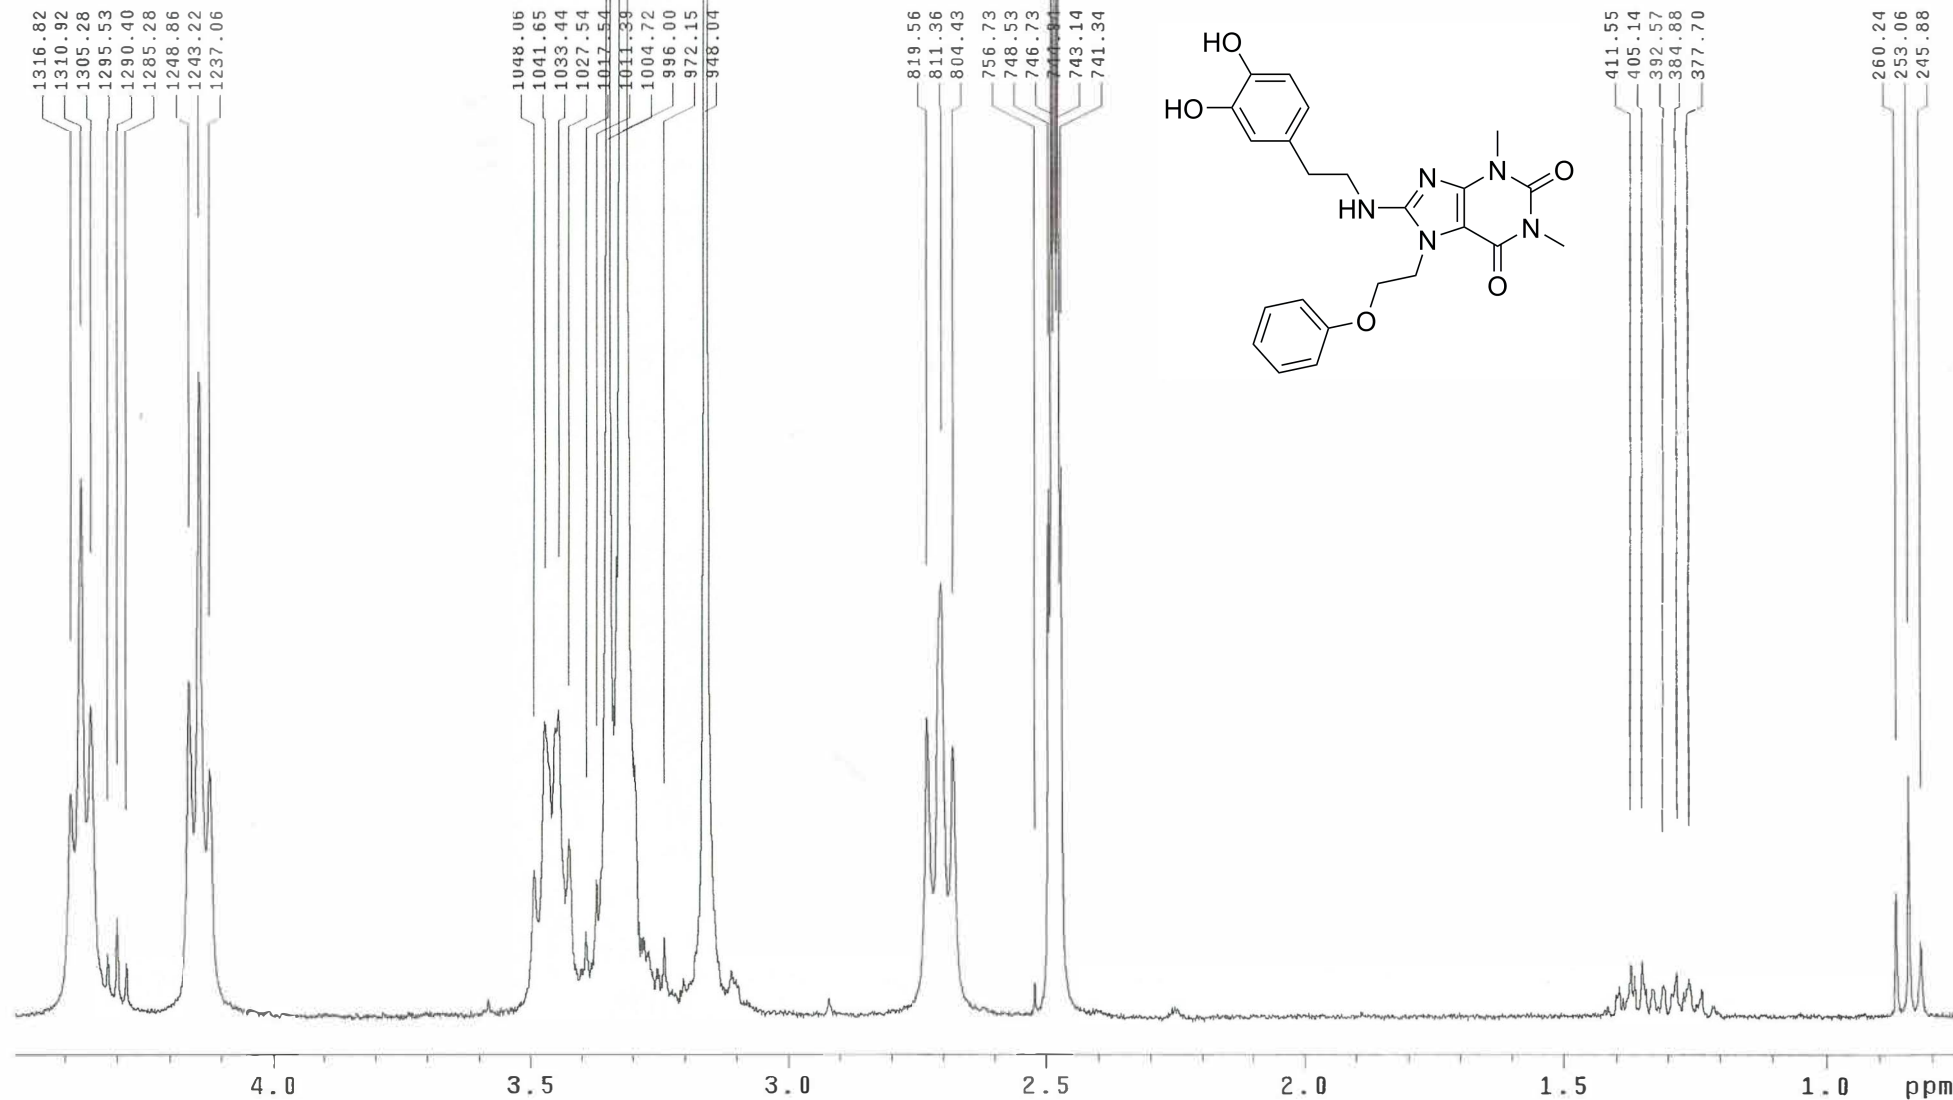

**Compound 11l**  
**<sup>1</sup>H NMR - zoom of the**  
**aromatic region**

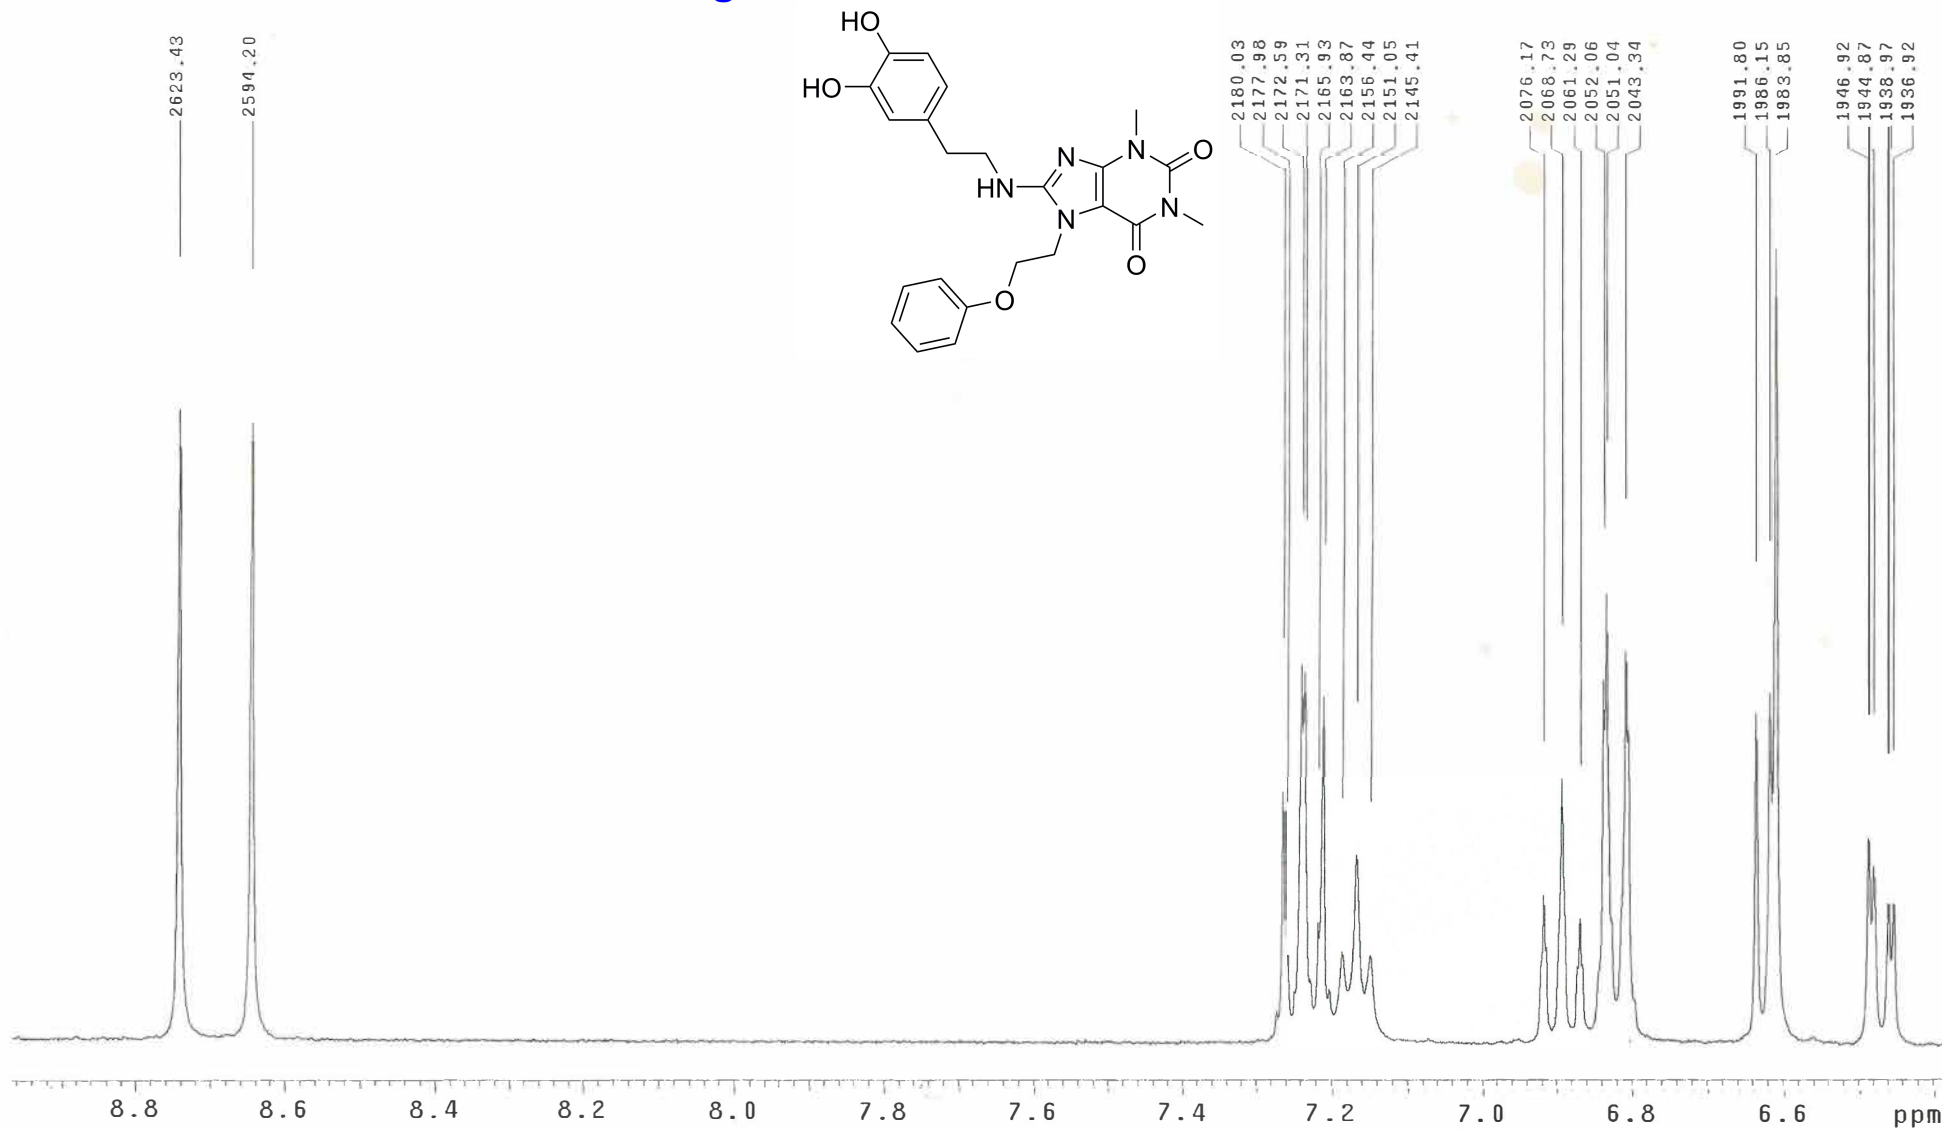

# Table of peaks

| INDEX | FREQUENCY | PPM   | HEIGHT | INDEX | FREQUENCY | PPM   | HEIGHT |
|-------|-----------|-------|--------|-------|-----------|-------|--------|
| 1     | 2623.433  | 8.742 | 47.5   | 40    | 1027.543  | 3.424 | 7.3    |
| 2     | 2594.198  | 8.645 | 46.6   | 41    | 1017.542  | 3.391 | 3.5    |
| 3     | 2182.339  | 7.273 | 2.5    | 42    | 1011.387  | 3.370 | 5.6    |
| 4     | 2180.031  | 7.265 | 19.0   | 43    | 1004.719  | 3.348 | 150.2  |
| 5     | 2177.979  | 7.258 | 6.6    | 44    | 1001.642  | 3.338 | 12.8   |
| 6     | 2172.594  | 7.240 | 28.5   | 45    | 1001.129  | 3.336 | 12.3   |
| 7     | 2171.312  | 7.236 | 28.0   | 46    | 1000.616  | 3.334 | 13.9   |
| 8     | 2165.926  | 7.218 | 9.1    | 47    | 999.590   | 3.331 | 18.9   |
| 9     | 2163.874  | 7.211 | 26.1   | 48    | 996.000   | 3.319 | 1145.0 |
| 10    | 2161.566  | 7.203 | 4.1    | 49    | 989.845   | 3.299 | 10.7   |
| 11    | 2156.437  | 7.186 | 7.0    | 50    | 988.819   | 3.295 | 10.3   |
| 12    | 2151.052  | 7.168 | 14.3   | 51    | 986.768   | 3.288 | 3.9    |
| 13    | 2145.410  | 7.149 | 6.7    | 52    | 985.742   | 3.285 | 3.2    |
| 14    | 2076.168  | 6.919 | 11.3   | 53    | 985.229   | 3.283 | 3.1    |
| 15    | 2075.143  | 6.915 | 7.3    | 54    | 984.716   | 3.282 | 3.2    |
| 16    | 2068.731  | 6.894 | 20.1   | 55    | 984.203   | 3.280 | 3.3    |
| 17    | 2061.294  | 6.869 | 9.5    | 56    | 983.178   | 3.276 | 3.1    |
| 18    | 2052.062  | 6.838 | 27.5   | 57    | 972.150   | 3.240 | 3.3    |
| 19    | 2051.036  | 6.835 | 34.0   | 58    | 948.044   | 3.159 | 138.3  |
| 20    | 2043.343  | 6.809 | 29.7   | 59    | 819.562   | 2.731 | 12.3   |
| 21    | 2042.317  | 6.806 | 23.8   | 60    | 811.356   | 2.704 | 17.8   |
| 22    | 1991.796  | 6.638 | 25.0   | 61    | 804.432   | 2.681 | 11.1   |
| 23    | 1986.154  | 6.619 | 26.6   | 62    | 748.526   | 2.494 | 21.7   |
| 24    | 1983.846  | 6.611 | 60.0   | 63    | 746.730   | 2.488 | 48.8   |
| 25    | 1946.918  | 6.488 | 15.6   | 64    | 744.935   | 2.482 | 68.8   |
| 26    | 1944.866  | 6.481 | 13.5   | 65    | 743.140   | 2.476 | 49.0   |
| 27    | 1938.968  | 6.461 | 10.6   | 66    | 741.345   | 2.470 | 22.6   |
| 28    | 1936.916  | 6.455 | 10.7   | 67    | 260.244   | 0.867 | 5.1    |
| 29    | 1316.819  | 4.388 | 9.1    | 68    | 253.064   | 0.843 | 9.9    |
| 30    | 1310.921  | 4.369 | 22.1   | 69    | 245.883   | 0.819 | 3.1    |
| 31    | 1305.279  | 4.350 | 12.8   |       |           |       |        |
| 32    | 1295.534  | 4.317 | 2.6    |       |           |       |        |
| 33    | 1290.405  | 4.300 | 4.1    |       |           |       |        |
| 34    | 1248.860  | 4.162 | 13.8   |       |           |       |        |
| 35    | 1243.218  | 4.143 | 26.5   |       |           |       |        |
| 36    | 1237.063  | 4.122 | 10.2   |       |           |       |        |
| 37    | 1048.059  | 3.493 | 6.0    |       |           |       |        |
| 38    | 1041.648  | 3.471 | 12.1   |       |           |       |        |
| 39    | 1033.442  | 3.444 | 12.6   |       |           |       |        |

# Compound 11I

## <sup>13</sup>C NMR

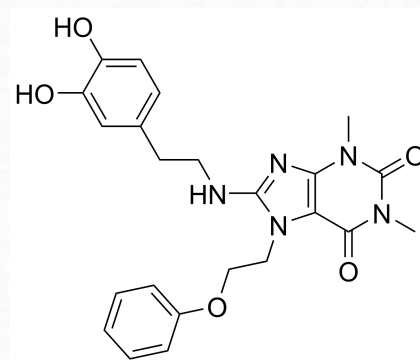

| No. | (ppm)  | (Hz)    | Height |
|-----|--------|---------|--------|
| 1   | 27.68  | 2785.9  | 0.0937 |
| 2   | 29.73  | 2992.0  | 0.1041 |
| 3   | 35.15  | 3537.1  | 0.0795 |
| 4   | 39.35  | 3959.7  | 0.1367 |
| 5   | 39.55  | 3980.2  | 0.4247 |
| 6   | 39.76  | 4001.5  | 0.8660 |
| 7   | 39.97  | 4022.8  | 1.0000 |
| 8   | 40.18  | 4043.3  | 0.8636 |
| 9   | 40.39  | 4064.6  | 0.4373 |
| 10  | 40.59  | 4085.1  | 0.1407 |
| 11  | 42.35  | 4261.9  | 0.0473 |
| 12  | 44.92  | 4520.9  | 0.0674 |
| 13  | 66.15  | 6657.1  | 0.0668 |
| 14  | 101.81 | 10245.1 | 0.0729 |
| 15  | 114.76 | 11548.7 | 0.2115 |
| 16  | 115.95 | 11668.3 | 0.0888 |
| 17  | 116.50 | 11723.3 | 0.0867 |
| 18  | 119.76 | 12052.0 | 0.0888 |
| 19  | 121.23 | 12200.1 | 0.0885 |
| 20  | 129.95 | 13077.5 | 0.1950 |
| 21  | 130.53 | 13135.5 | 0.0810 |
| 22  | 144.05 | 14496.3 | 0.0981 |
| 23  | 145.57 | 14648.9 | 0.1032 |
| 24  | 149.24 | 15018.6 | 0.0565 |
| 25  | 151.42 | 15238.0 | 0.0684 |
| 26  | 153.15 | 15411.8 | 0.0663 |
| 27  | 154.49 | 15546.8 | 0.0697 |
| 28  | 158.43 | 15943.7 | 0.0840 |

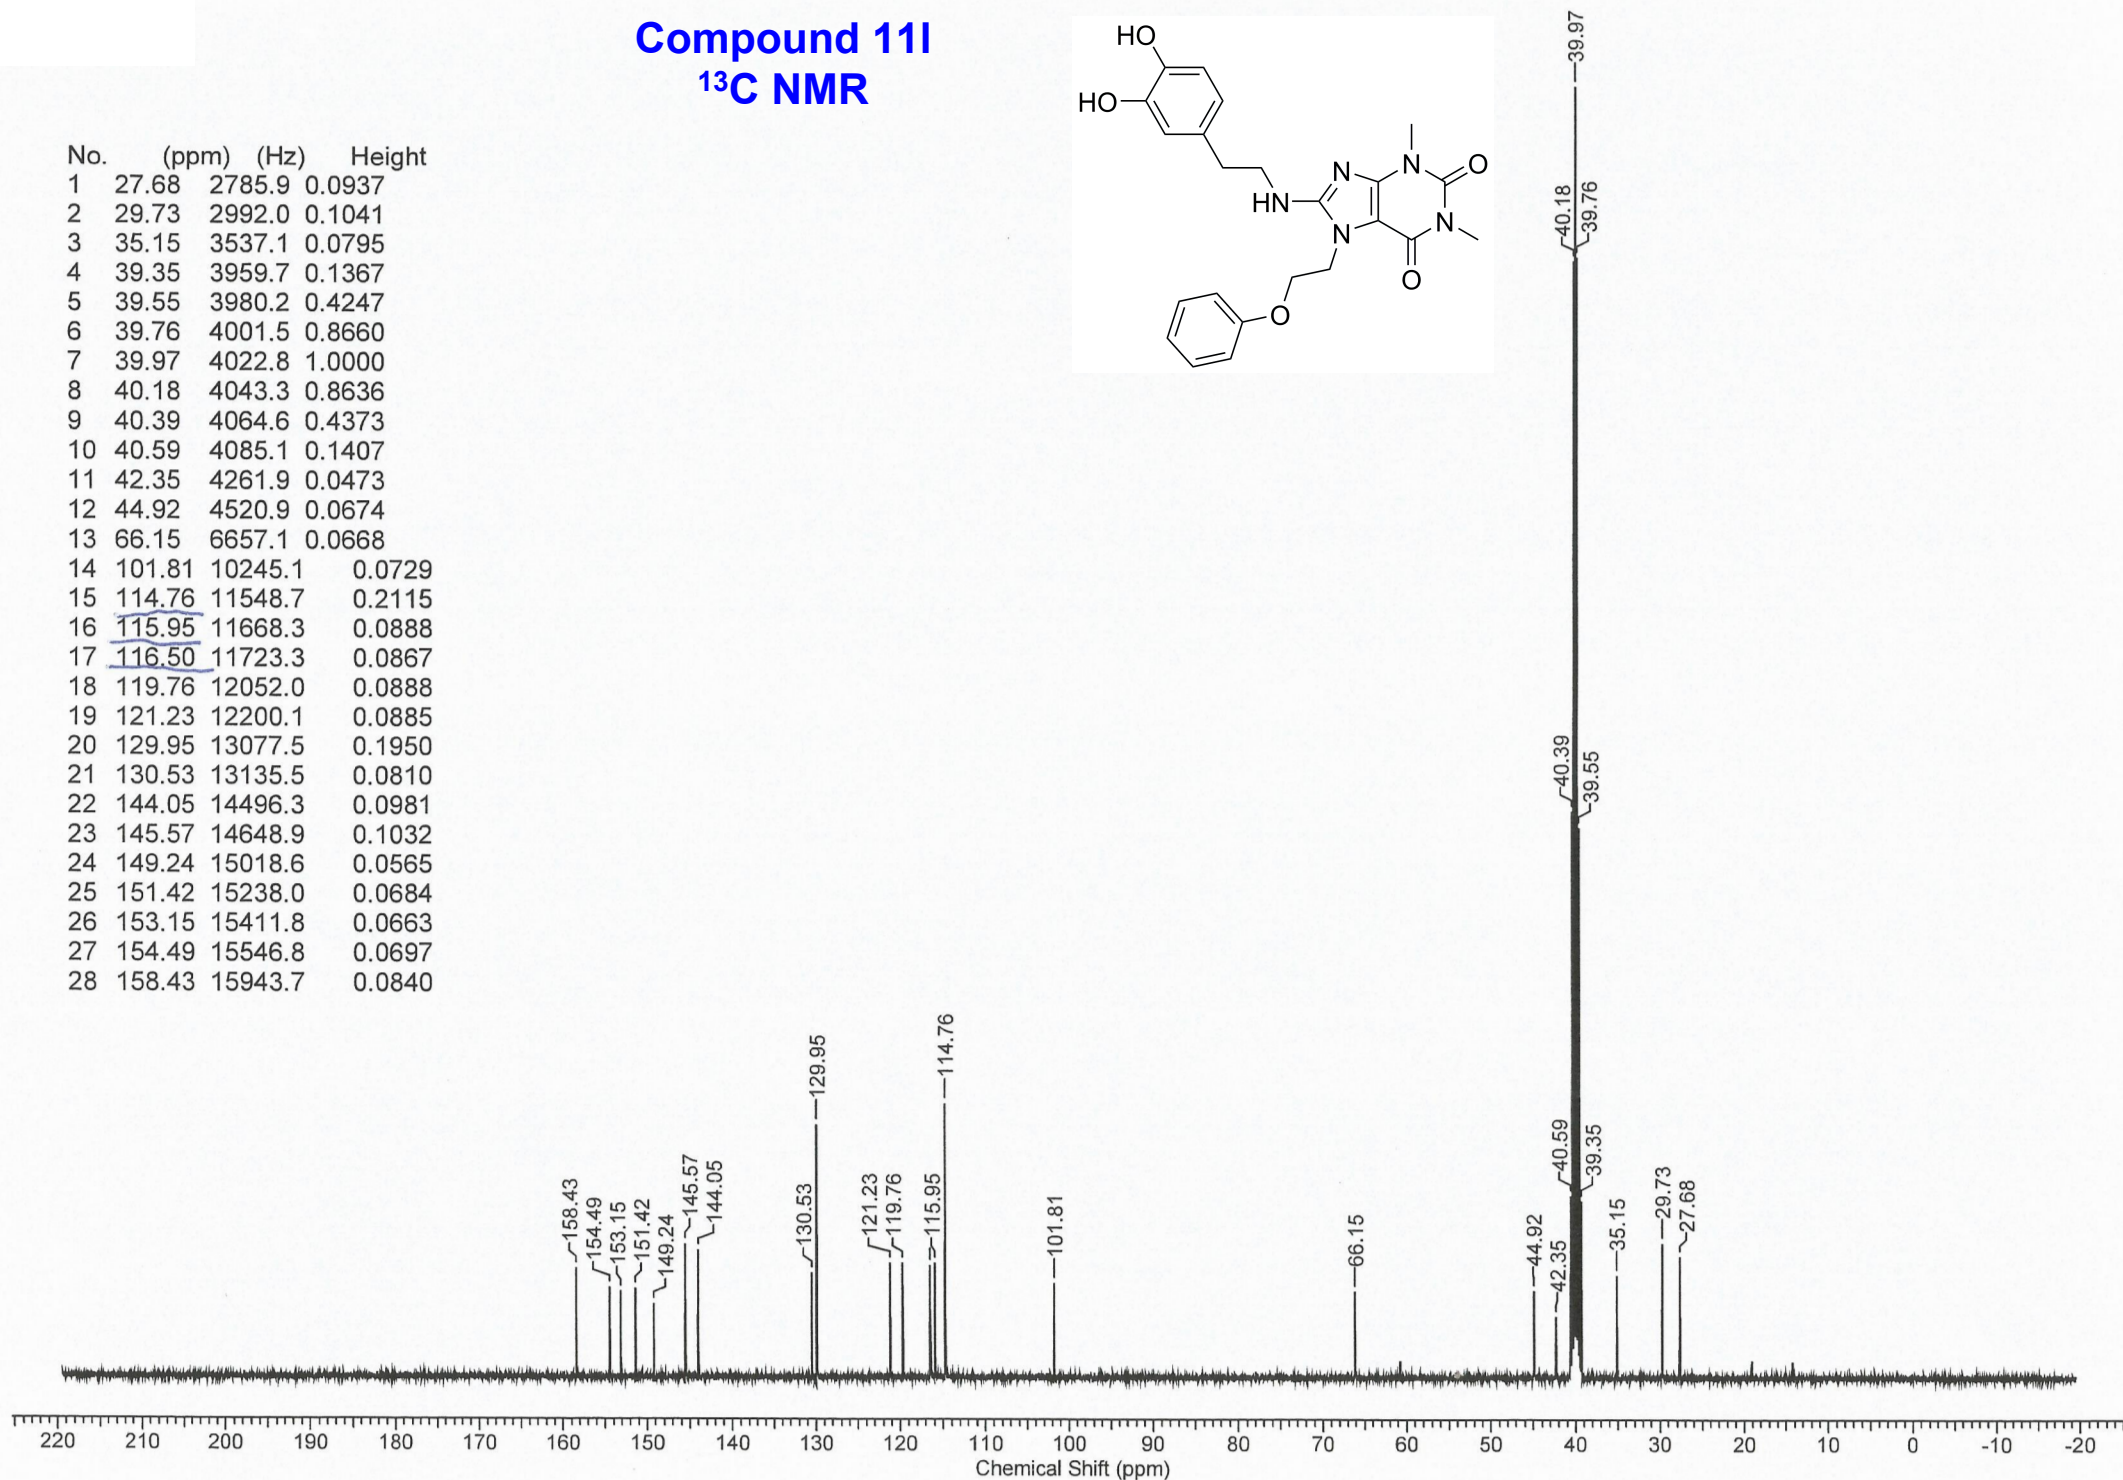

**Compound 12**  
 **$^1\text{H}$  NMR - zoom of the**  
**aromatic region**

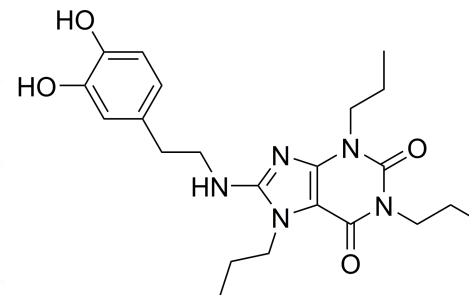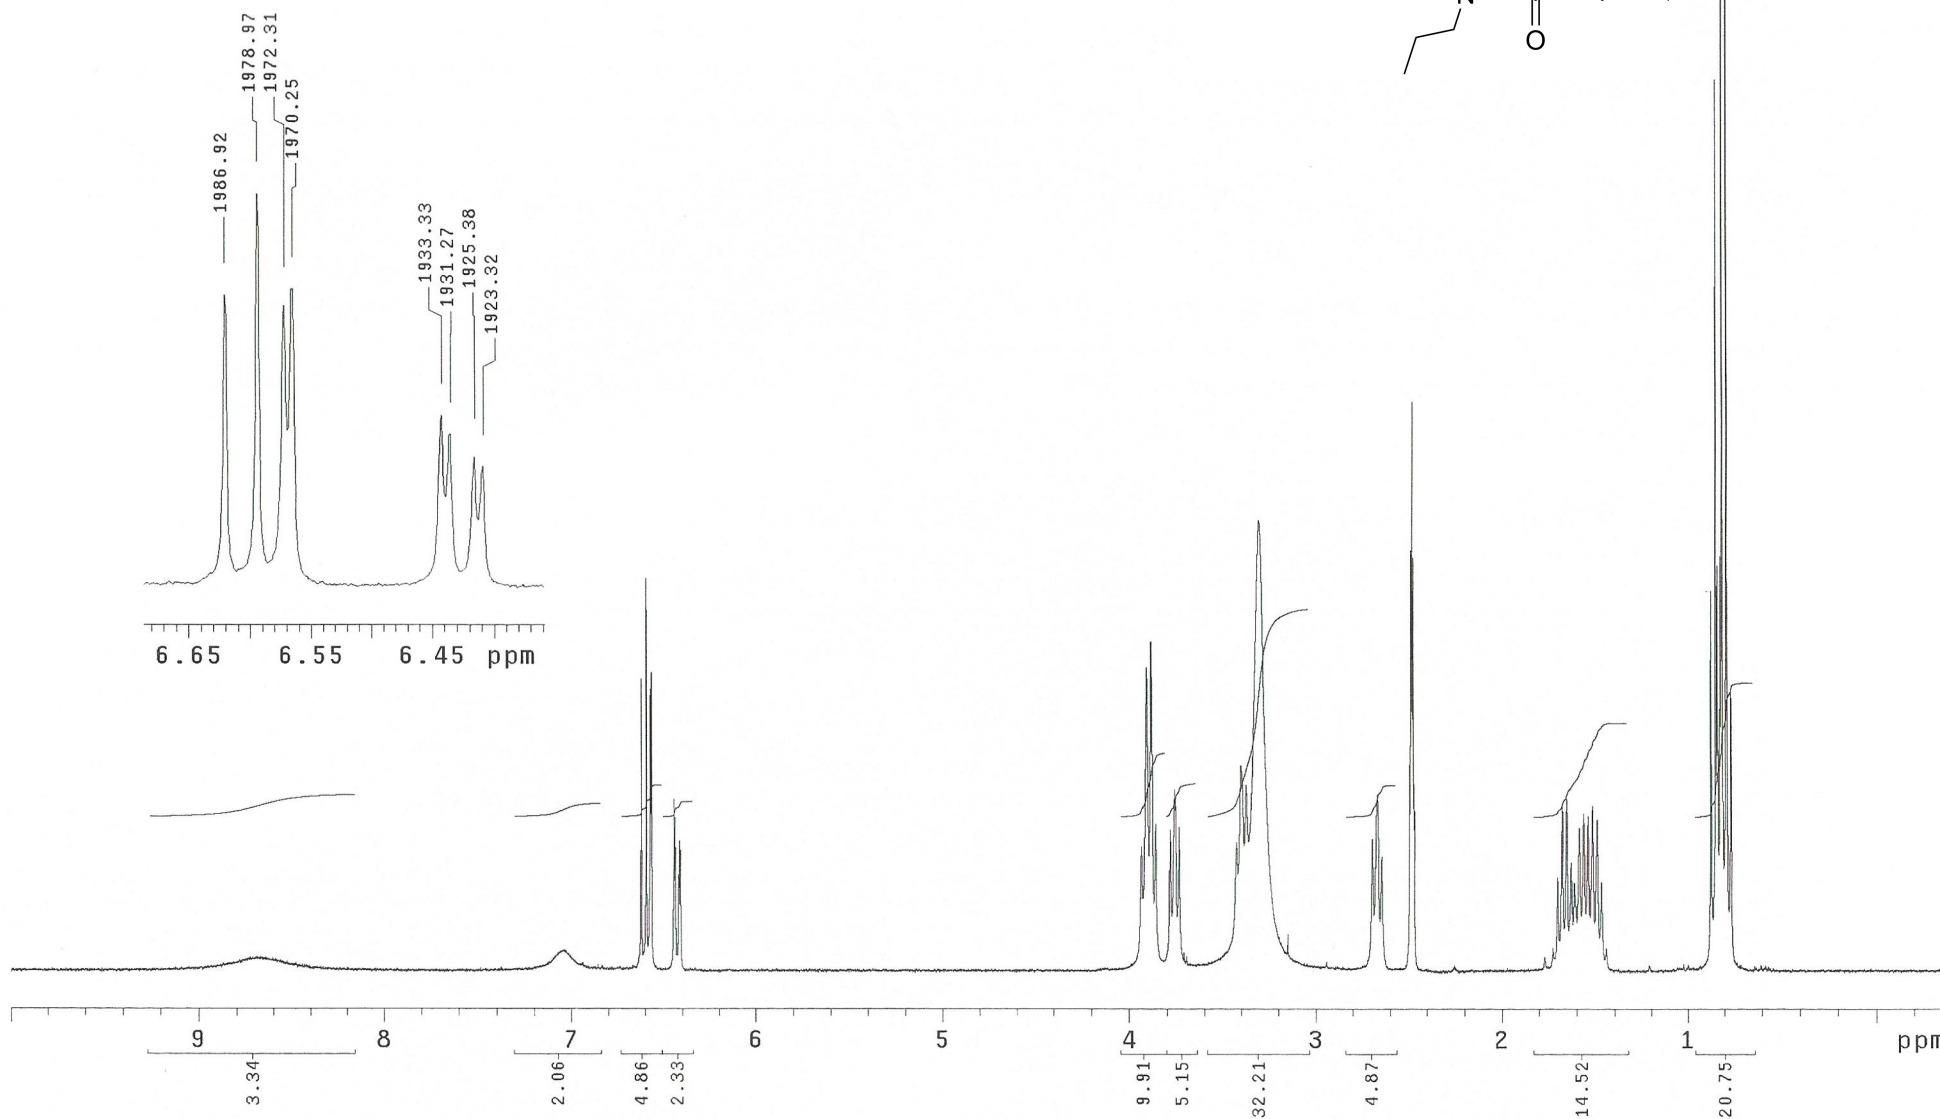

**Compound 12**  
**<sup>1</sup>H NMR - zoom of the**  
**aliphatic region**

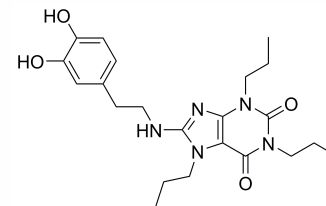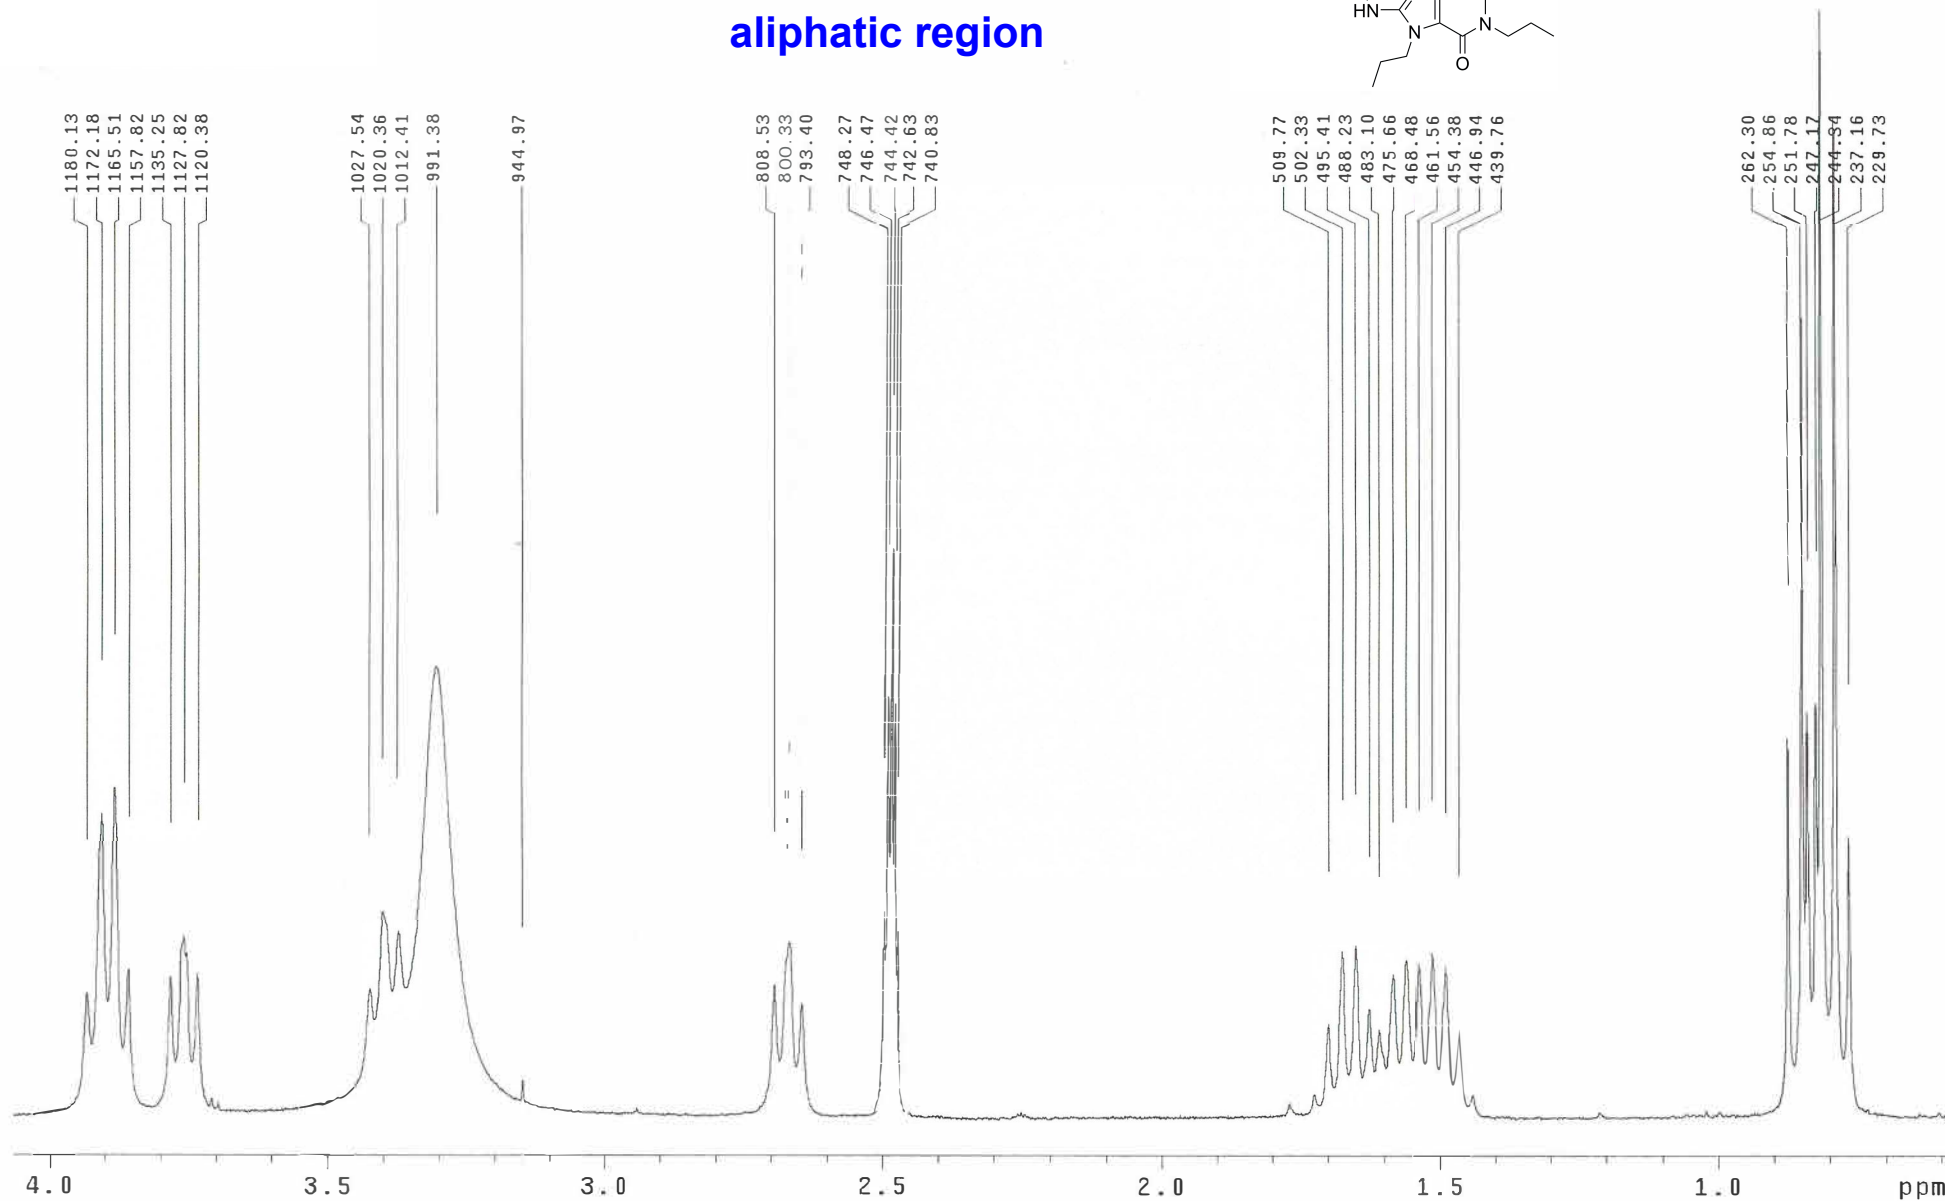

## Table of peaks

| INDEX | FREQUENCY | PPM   | HEIGHT | INDEX | FREQUENCY | PPM   | HEIGHT |
|-------|-----------|-------|--------|-------|-----------|-------|--------|
| 1     | 2111.302  | 7.036 | 2.7    | 40    | 446.940   | 1.489 | 19.7   |
| 2     | 1986.924  | 6.621 | 38.0   | 41    | 439.760   | 1.465 | 11.5   |
| 3     | 1978.974  | 6.595 | 51.1   | 42    | 432.322   | 1.441 | 2.9    |
| 4     | 1972.306  | 6.573 | 36.6   | 43    | 262.296   | 0.874 | 49.4   |
| 5     | 1970.255  | 6.566 | 38.8   | 44    | 254.859   | 0.849 | 115.8  |
| 6     | 1933.326  | 6.443 | 22.3   | 45    | 251.781   | 0.839 | 52.8   |
| 7     | 1931.274  | 6.436 | 19.9   | 46    | 247.165   | 0.824 | 54.0   |
| 8     | 1925.376  | 6.416 | 16.8   | 47    | 244.344   | 0.814 | 144.0  |
| 9     | 1923.324  | 6.409 | 15.6   | 48    | 237.164   | 0.790 | 130.0  |
| 10    | 1180.131  | 3.933 | 16.1   | 49    | 229.727   | 0.766 | 36.5   |
| 11    | 1172.181  | 3.906 | 39.5   |       |           |       |        |
| 12    | 1165.514  | 3.884 | 42.8   |       |           |       |        |
| 13    | 1157.820  | 3.858 | 19.1   |       |           |       |        |
| 14    | 1135.253  | 3.783 | 18.3   |       |           |       |        |
| 15    | 1127.815  | 3.758 | 23.5   |       |           |       |        |
| 16    | 1120.378  | 3.734 | 18.6   |       |           |       |        |
| 17    | 1027.543  | 3.424 | 16.7   |       |           |       |        |
| 18    | 1020.363  | 3.400 | 26.7   |       |           |       |        |
| 19    | 1012.413  | 3.374 | 24.1   |       |           |       |        |
| 20    | 991.384   | 3.304 | 58.6   |       |           |       |        |
| 21    | 944.966   | 3.149 | 4.7    |       |           |       |        |
| 22    | 808.535   | 2.694 | 17.1   |       |           |       |        |
| 23    | 800.329   | 2.667 | 22.8   |       |           |       |        |
| 24    | 793.404   | 2.644 | 14.8   |       |           |       |        |
| 25    | 748.269   | 2.494 | 26.7   |       |           |       |        |
| 26    | 746.474   | 2.488 | 54.7   |       |           |       |        |
| 27    | 744.422   | 2.481 | 74.1   |       |           |       |        |
| 28    | 742.627   | 2.475 | 53.8   |       |           |       |        |
| 29    | 740.832   | 2.469 | 24.2   |       |           |       |        |
| 30    | 517.207   | 1.724 | 3.0    |       |           |       |        |
| 31    | 509.770   | 1.699 | 12.1   |       |           |       |        |
| 32    | 502.333   | 1.674 | 21.5   |       |           |       |        |
| 33    | 495.409   | 1.651 | 22.2   |       |           |       |        |
| 34    | 488.229   | 1.627 | 14.0   |       |           |       |        |
| 35    | 483.100   | 1.610 | 11.4   |       |           |       |        |
| 36    | 475.663   | 1.585 | 18.6   |       |           |       |        |
| 37    | 468.482   | 1.561 | 20.4   |       |           |       |        |
| 38    | 461.558   | 1.538 | 20.1   |       |           |       |        |
| 39    | 454.377   | 1.514 | 21.4   |       |           |       |        |

# Compound 12 <sup>13</sup>C NMR

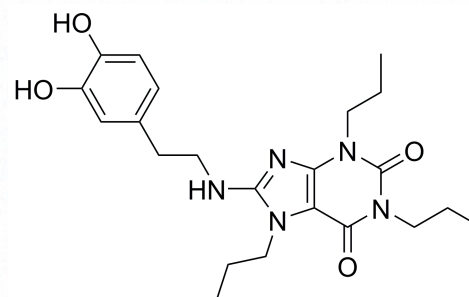

| No. | (ppm)  | (Hz)    | Height |
|-----|--------|---------|--------|
| 1   | 11.00  | 1106.7  | 0.0989 |
| 2   | 11.55  | 1162.5  | 0.0923 |
| 3   | 11.64  | 1171.3  | 0.0788 |
| 4   | 21.36  | 2149.1  | 0.0634 |
| 5   | 21.45  | 2158.7  | 0.0616 |
| 6   | 22.87  | 2301.0  | 0.0570 |
| 7   | 35.18  | 3540.0  | 0.0423 |
| 8   | 39.35  | 3960.4  | 0.1396 |
| 9   | 39.56  | 3980.9  | 0.4161 |
| 10  | 39.77  | 4002.2  | 0.8570 |
| 11  | 39.98  | 4023.5  | 1.0000 |
| 12  | 40.19  | 4044.0  | 0.8434 |
| 13  | 40.40  | 4065.3  | 0.4290 |
| 14  | 40.61  | 4086.6  | 0.1355 |
| 15  | 41.92  | 4218.6  | 0.0337 |
| 16  | 44.14  | 4442.4  | 0.0315 |
| 17  | 44.28  | 4456.3  | 0.0345 |
| 18  | 44.95  | 4523.8  | 0.0410 |
| 19  | 101.93 | 10257.6 | 0.0475 |
| 20  | 115.90 | 11663.1 | 0.0541 |
| 21  | 116.58 | 11731.4 | 0.0545 |
| 22  | 119.74 | 12049.8 | 0.0571 |
| 23  | 130.61 | 13143.5 | 0.0420 |
| 24  | 143.99 | 14490.4 | 0.0466 |
| 25  | 145.52 | 14644.5 | 0.0652 |
| 26  | 148.87 | 14981.2 | 0.0372 |
| 27  | 150.95 | 15190.3 | 0.0415 |
| 28  | 152.93 | 15389.8 | 0.0365 |
| 29  | 153.77 | 15474.2 | 0.0539 |

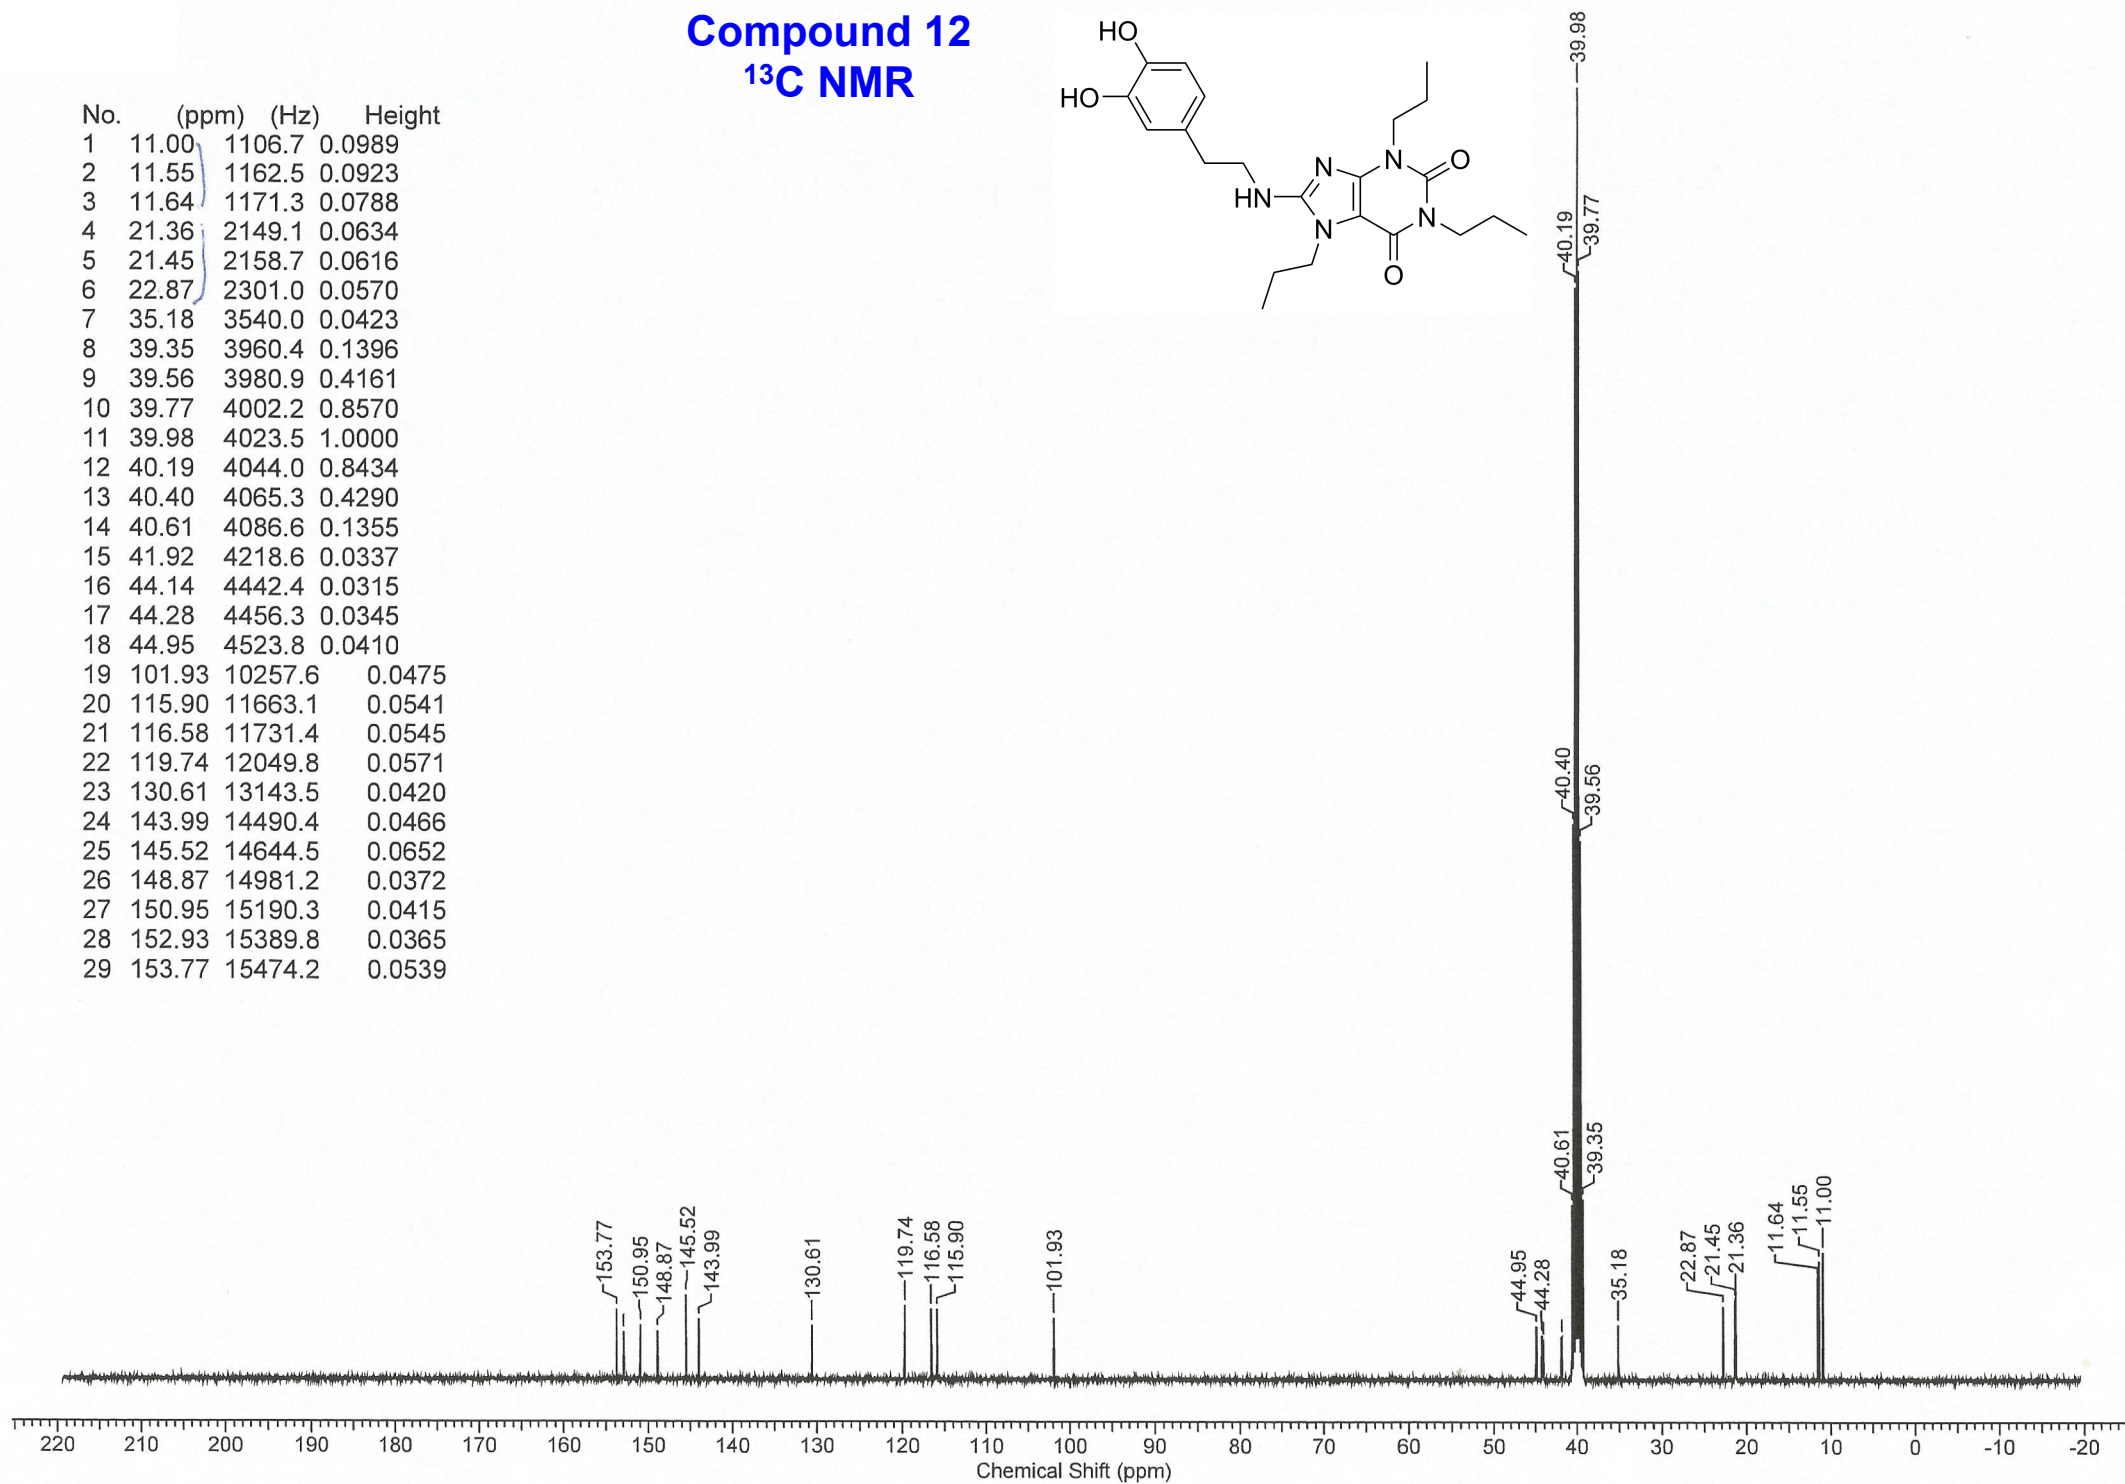

**Compound 13**  
 **$^1\text{H}$  NMR - zoom of the aromatic region**

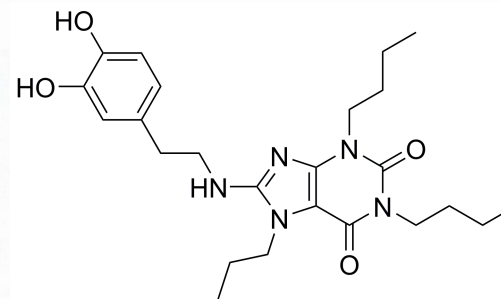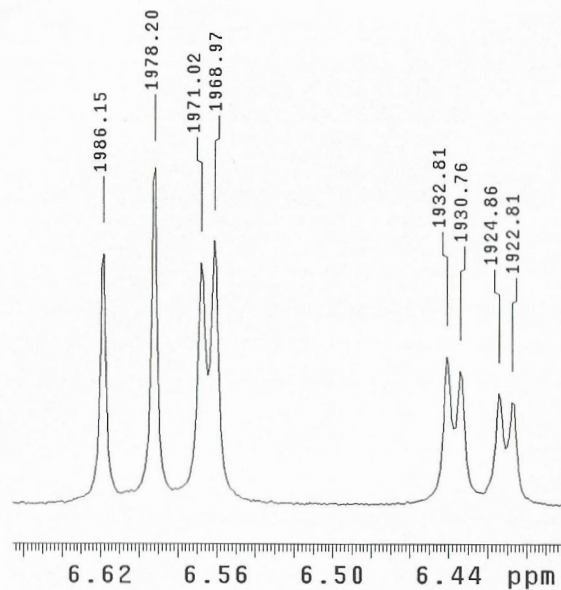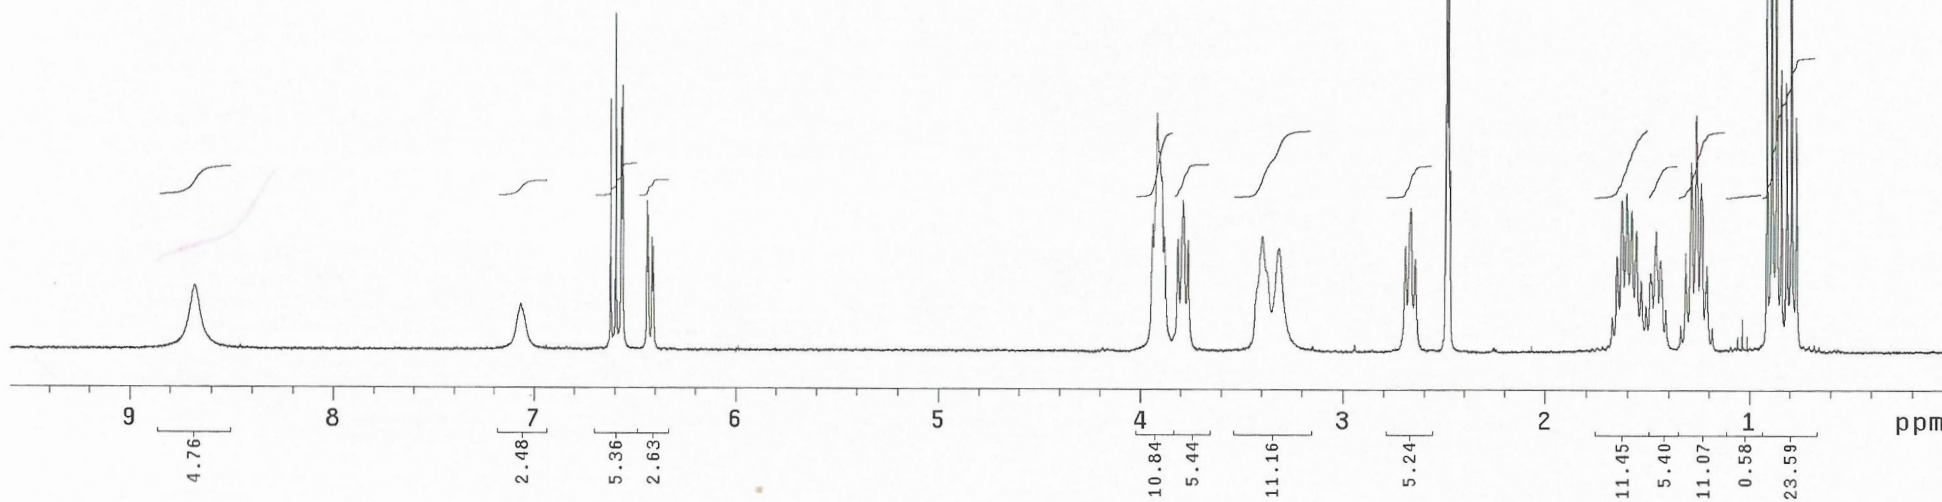

**Compound 13**  
**<sup>1</sup>H NMR - zoom of the**  
**aliphatic region**

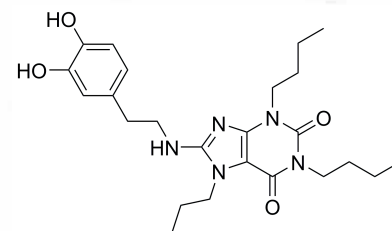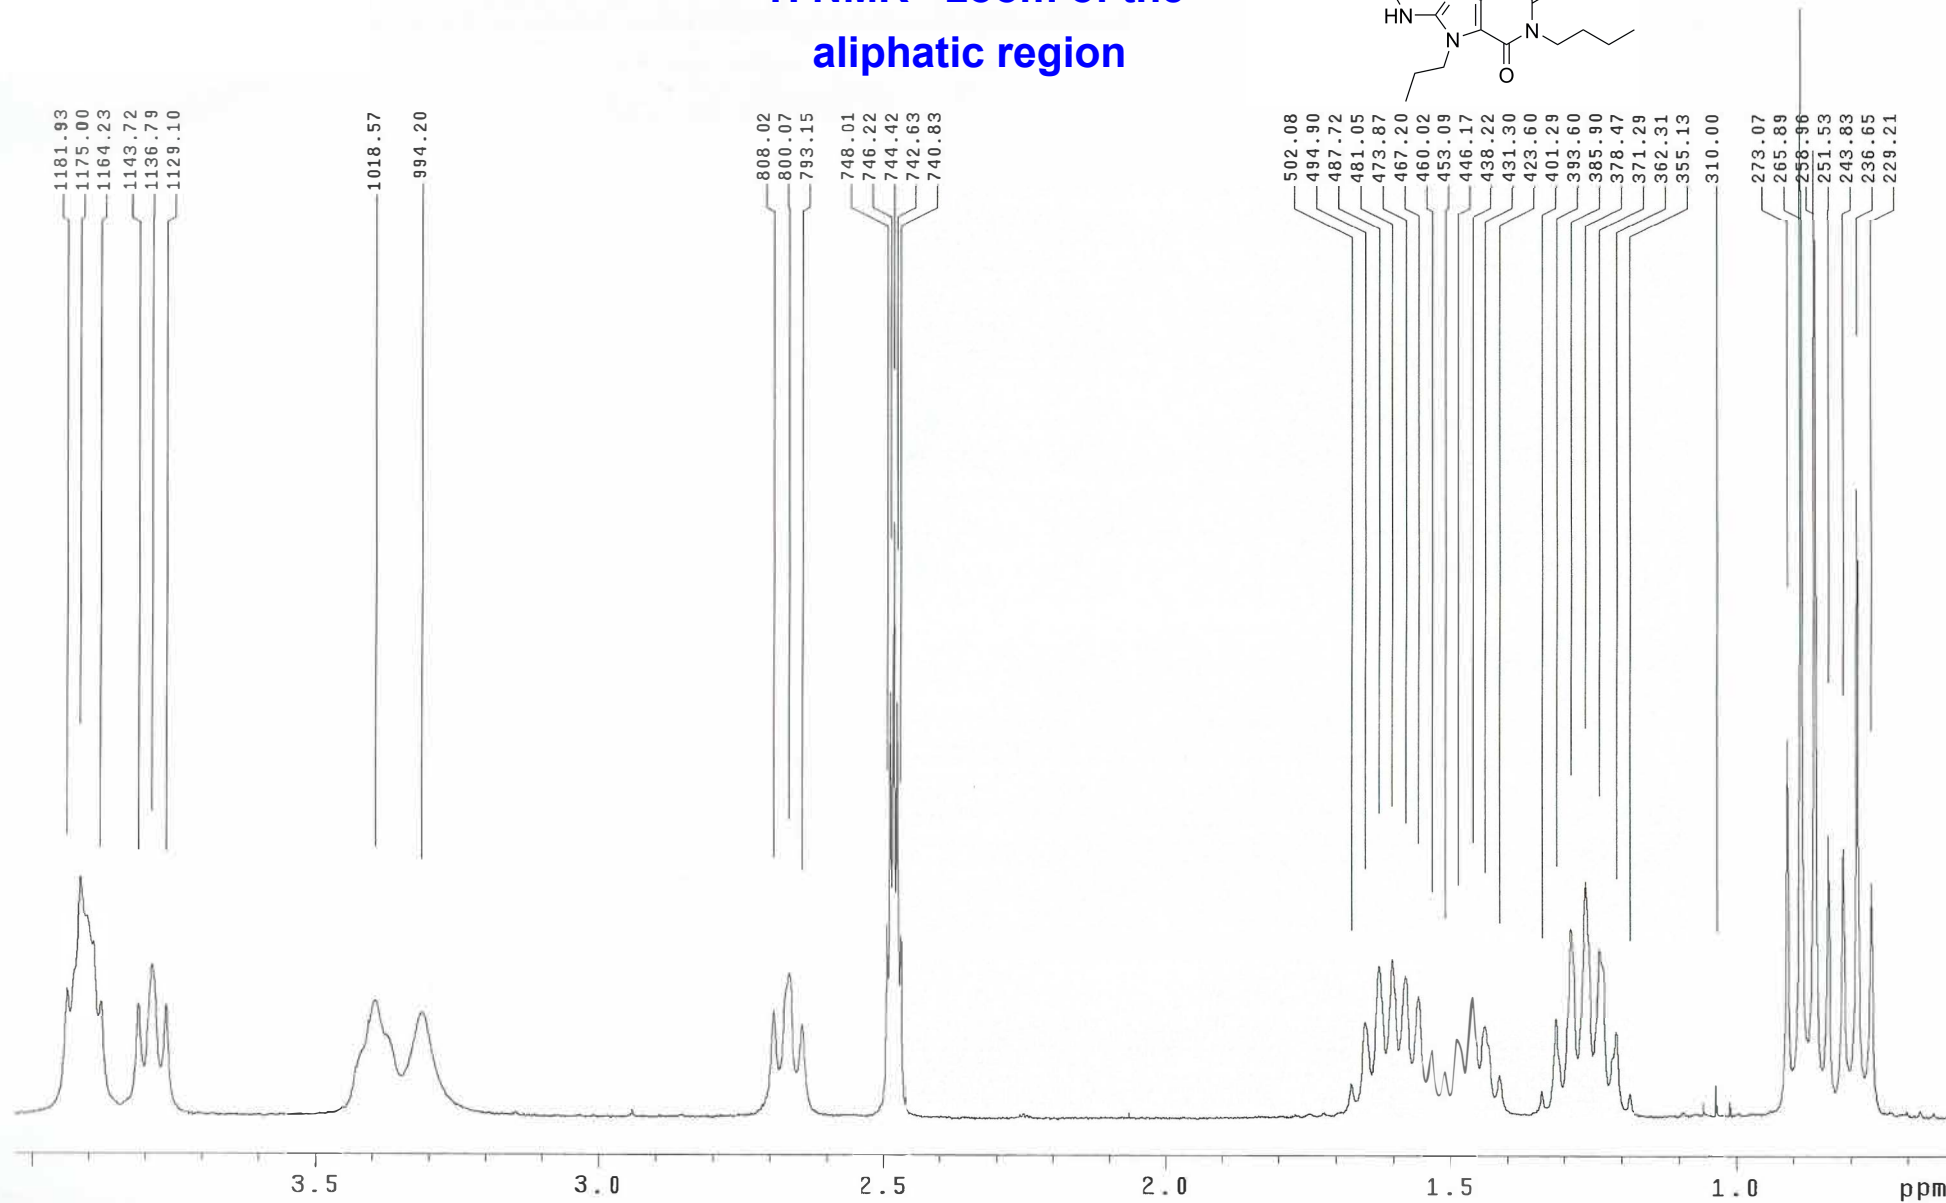

## Table of peaks

| INDEX | FREQUENCY | PPM   | HEIGHT | INDEX | FREQUENCY | PPM   | HEIGHT |
|-------|-----------|-------|--------|-------|-----------|-------|--------|
| 1     | 2604.969  | 8.681 | 8.3    | 40    | 401.292   | 1.337 | 3.5    |
| 2     | 2120.278  | 7.066 | 5.9    | 41    | 393.598   | 1.312 | 12.8   |
| 3     | 1986.154  | 6.619 | 32.5   | 42    | 385.905   | 1.286 | 24.6   |
| 4     | 1978.204  | 6.592 | 43.7   | 43    | 378.468   | 1.261 | 30.7   |
| 5     | 1971.024  | 6.568 | 31.4   | 44    | 371.287   | 1.237 | 21.9   |
| 6     | 1968.972  | 6.561 | 34.3   | 45    | 362.312   | 1.207 | 11.2   |
| 7     | 1932.813  | 6.441 | 19.3   | 46    | 355.131   | 1.183 | 3.1    |
| 8     | 1930.761  | 6.434 | 17.5   | 47    | 309.996   | 1.033 | 4.3    |
| 9     | 1924.863  | 6.414 | 14.5   | 48    | 273.067   | 0.910 | 49.1   |
| 10    | 1922.811  | 6.408 | 13.4   | 49    | 265.886   | 0.886 | 144.0  |
| 11    | 1181.926  | 3.939 | 16.5   | 50    | 258.962   | 0.863 | 125.6  |
| 12    | 1175.002  | 3.916 | 30.9   | 51    | 251.525   | 0.838 | 36.7   |
| 13    | 1168.078  | 3.893 | 22.6   | 52    | 243.832   | 0.813 | 35.0   |
| 14    | 1164.231  | 3.880 | 14.8   | 53    | 236.651   | 0.789 | 81.8   |
| 15    | 1143.715  | 3.811 | 14.5   | 54    | 229.214   | 0.764 | 30.5   |
| 16    | 1136.791  | 3.788 | 19.6   |       |           |       |        |
| 17    | 1129.098  | 3.763 | 14.4   |       |           |       |        |
| 18    | 1018.568  | 3.394 | 15.0   |       |           |       |        |
| 19    | 994.205   | 3.313 | 13.4   |       |           |       |        |
| 20    | 808.022   | 2.693 | 13.7   |       |           |       |        |
| 21    | 800.072   | 2.666 | 18.6   |       |           |       |        |
| 22    | 793.148   | 2.643 | 12.1   |       |           |       |        |
| 23    | 748.013   | 2.493 | 25.0   |       |           |       |        |
| 24    | 746.218   | 2.487 | 55.1   |       |           |       |        |
| 25    | 744.422   | 2.481 | 77.2   |       |           |       |        |
| 26    | 742.627   | 2.475 | 53.8   |       |           |       |        |
| 27    | 740.832   | 2.469 | 23.5   |       |           |       |        |
| 28    | 502.077   | 1.673 | 4.5    |       |           |       |        |
| 29    | 494.896   | 1.649 | 12.5   |       |           |       |        |
| 30    | 487.716   | 1.625 | 19.6   |       |           |       |        |
| 31    | 481.048   | 1.603 | 20.6   |       |           |       |        |
| 32    | 473.867   | 1.579 | 18.4   |       |           |       |        |
| 33    | 467.200   | 1.557 | 15.8   |       |           |       |        |
| 34    | 460.019   | 1.533 | 9.3    |       |           |       |        |
| 35    | 453.095   | 1.510 | 6.0    |       |           |       |        |
| 36    | 446.171   | 1.487 | 10.2   |       |           |       |        |
| 37    | 438.221   | 1.460 | 15.8   |       |           |       |        |
| 38    | 431.297   | 1.437 | 12.0   |       |           |       |        |
| 39    | 423.603   | 1.412 | 5.5    |       |           |       |        |

# Compound 13 <sup>13</sup>C NMR

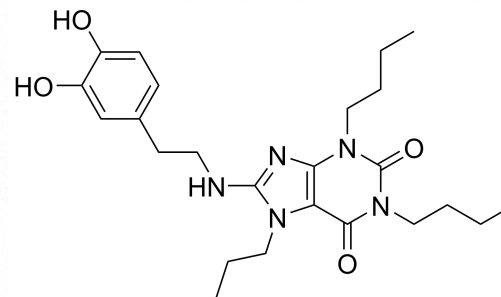

| No. | (ppm)  | (Hz)    | Height |
|-----|--------|---------|--------|
| 1   | 11.00  | 1106.7  | 0.1214 |
| 2   | 14.08  | 1417.0  | 0.1237 |
| 3   | 14.19  | 1428.0  | 0.1147 |
| 4   | 19.82  | 1994.4  | 0.1183 |
| 5   | 20.14  | 2026.6  | 0.0932 |
| 6   | 22.87  | 2301.7  | 0.0688 |
| 7   | 30.08  | 3027.3  | 0.0749 |
| 8   | 30.32  | 3051.5  | 0.0640 |
| 9   | 35.20  | 3542.2  | 0.0456 |
| 10  | 39.35  | 3959.7  | 0.1338 |
| 11  | 39.56  | 3980.9  | 0.4279 |
| 12  | 39.77  | 4002.2  | 0.8441 |
| 13  | 39.97  | 4022.8  | 1.0000 |
| 14  | 40.19  | 4044.0  | 0.8771 |
| 15  | 40.40  | 4065.3  | 0.4165 |
| 16  | 40.60  | 4085.8  | 0.1394 |
| 17  | 42.41  | 4267.8  | 0.0361 |
| 18  | 44.14  | 4442.4  | 0.0332 |
| 19  | 44.94  | 4522.3  | 0.0485 |
| 20  | 101.95 | 10259.0 | 0.0519 |
| 21  | 115.88 | 11661.7 | 0.0620 |
| 22  | 116.58 | 11731.4 | 0.0624 |
| 23  | 119.70 | 12046.1 | 0.0634 |
| 24  | 130.60 | 13142.8 | 0.0554 |
| 25  | 143.98 | 14489.0 | 0.0616 |
| 26  | 145.52 | 14644.5 | 0.0638 |
| 27  | 148.84 | 14978.3 | 0.0474 |
| 28  | 150.87 | 15182.2 | 0.0428 |
| 29  | 152.89 | 15385.4 | 0.0475 |
| 30  | 153.75 | 15472.0 | 0.0581 |

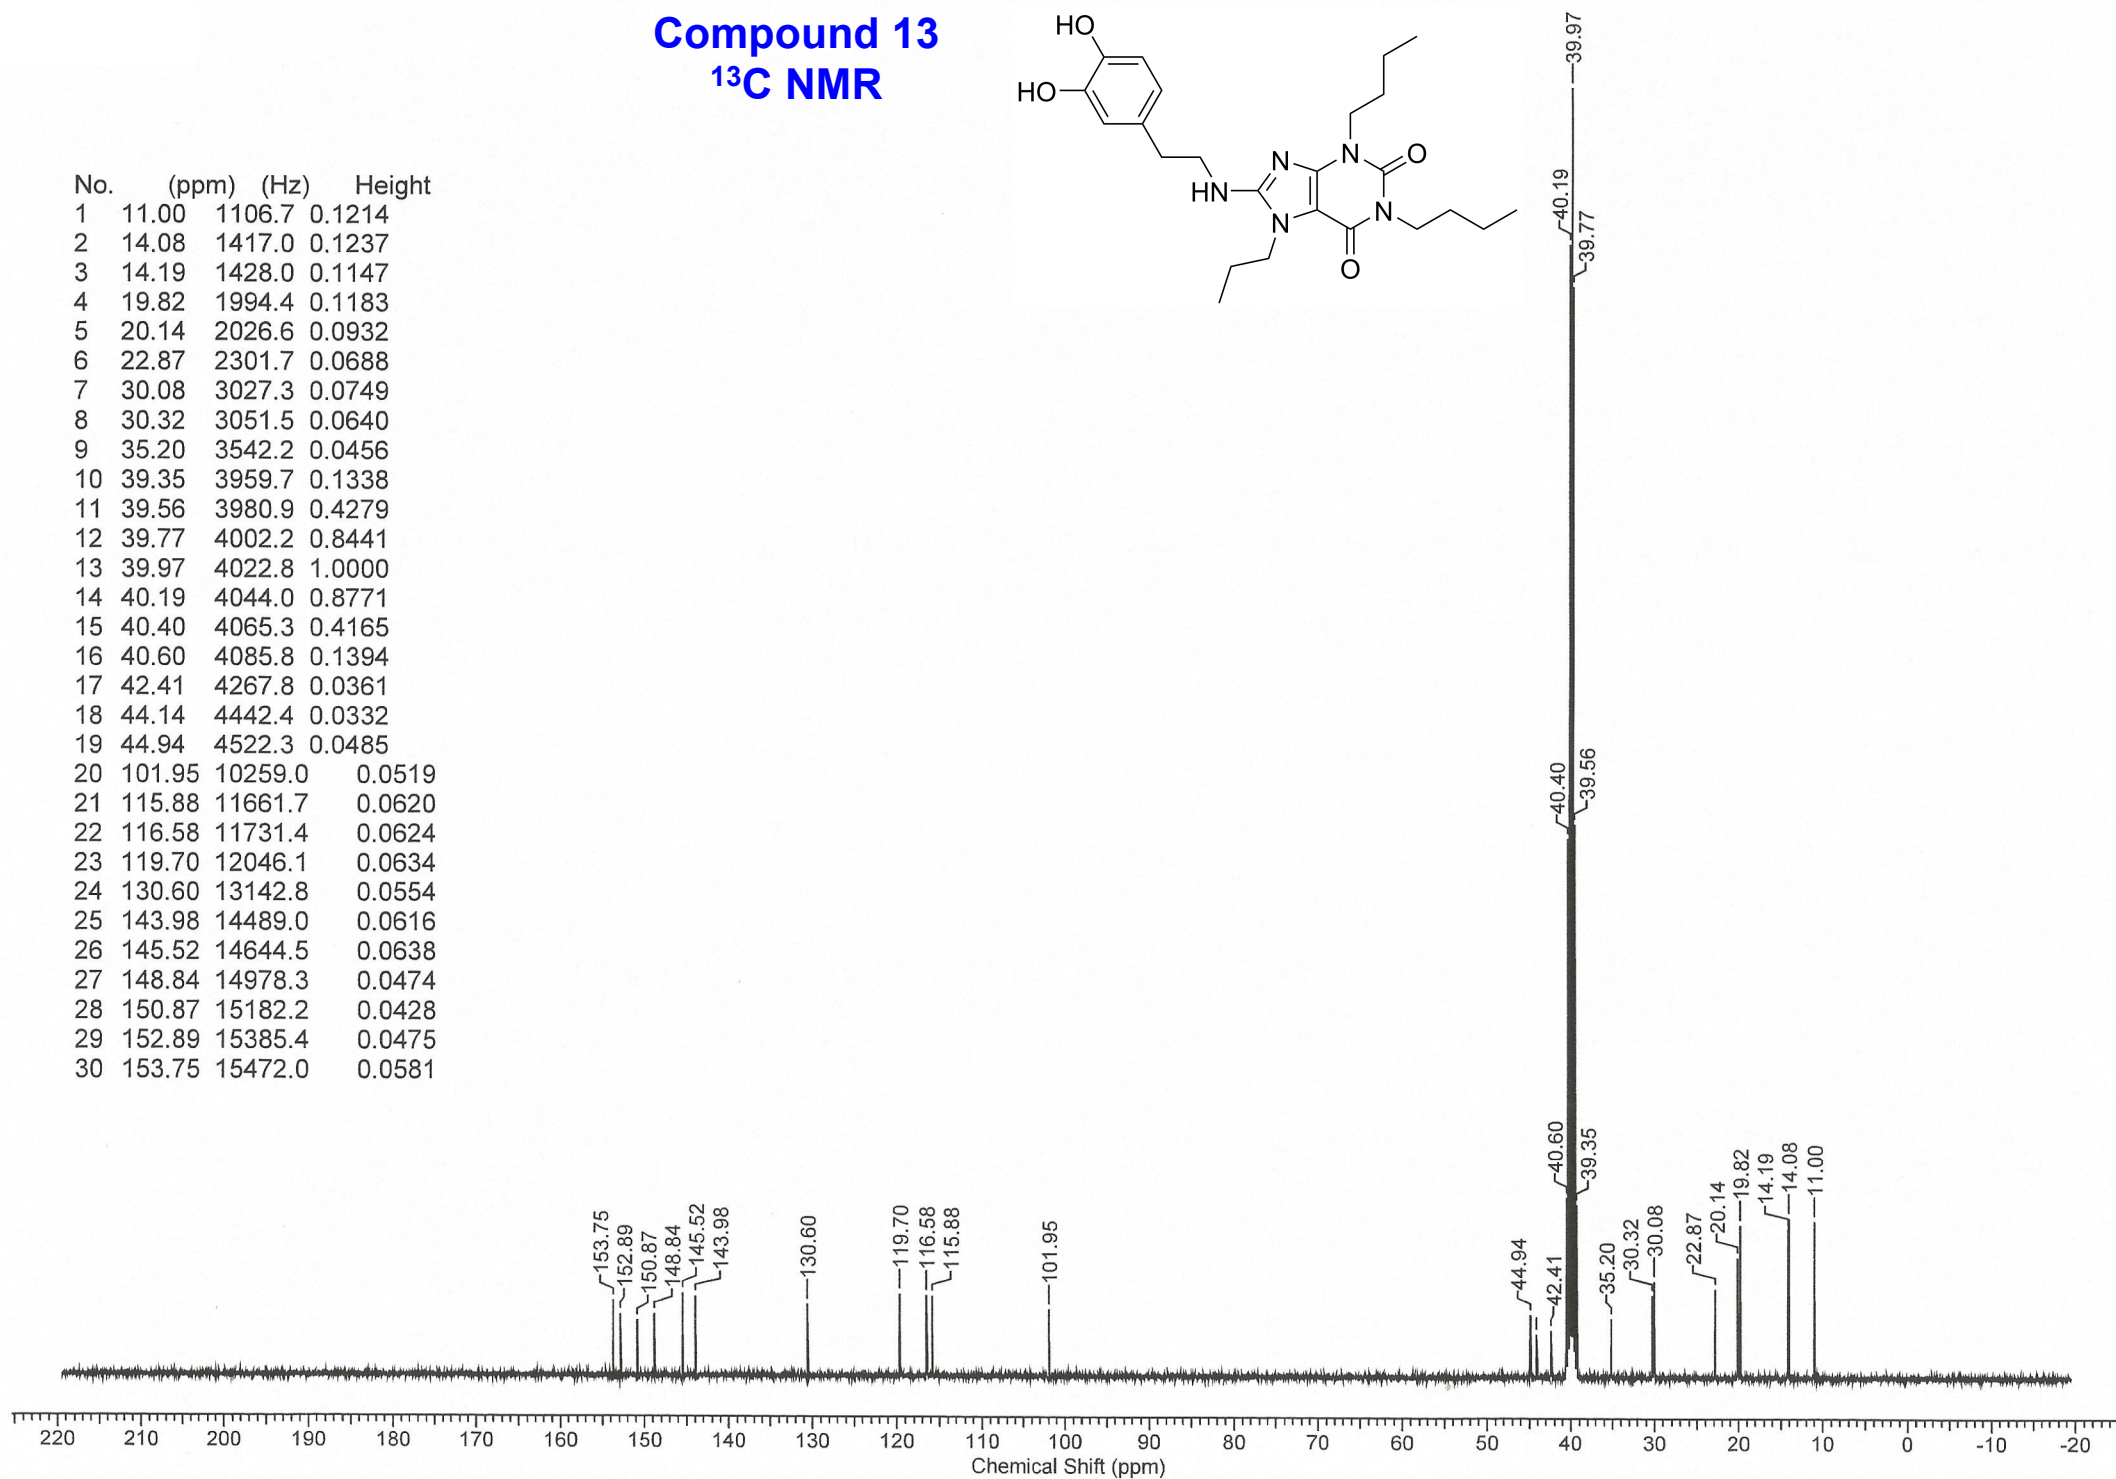

Compound 20a  
<sup>1</sup>H NMR

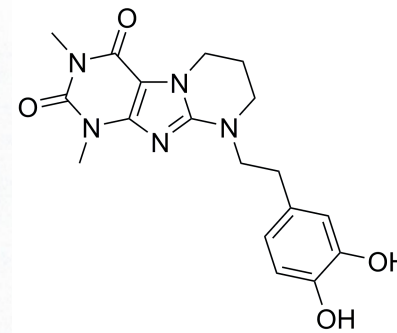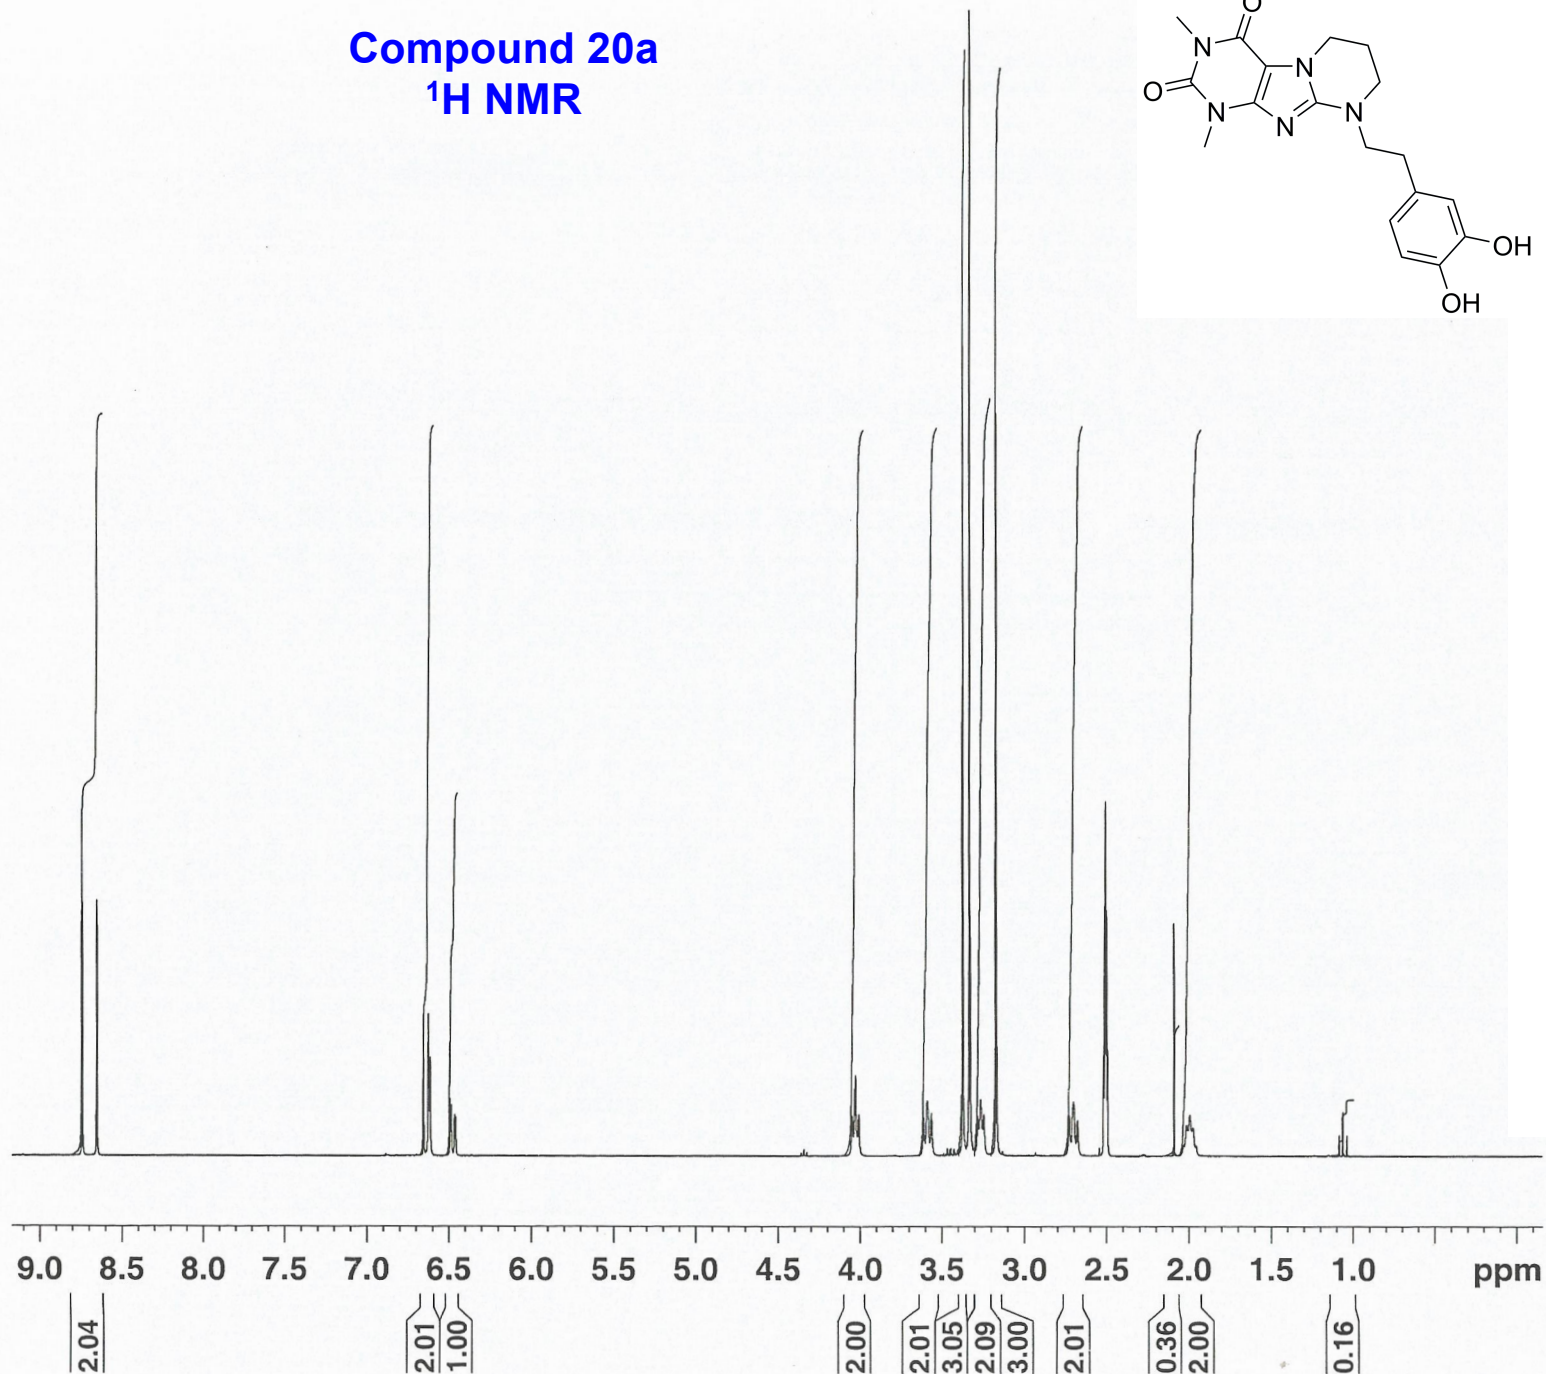

**Compound 20a**  
**<sup>1</sup>H NMR - zoom of the**  
**aliphatic region**

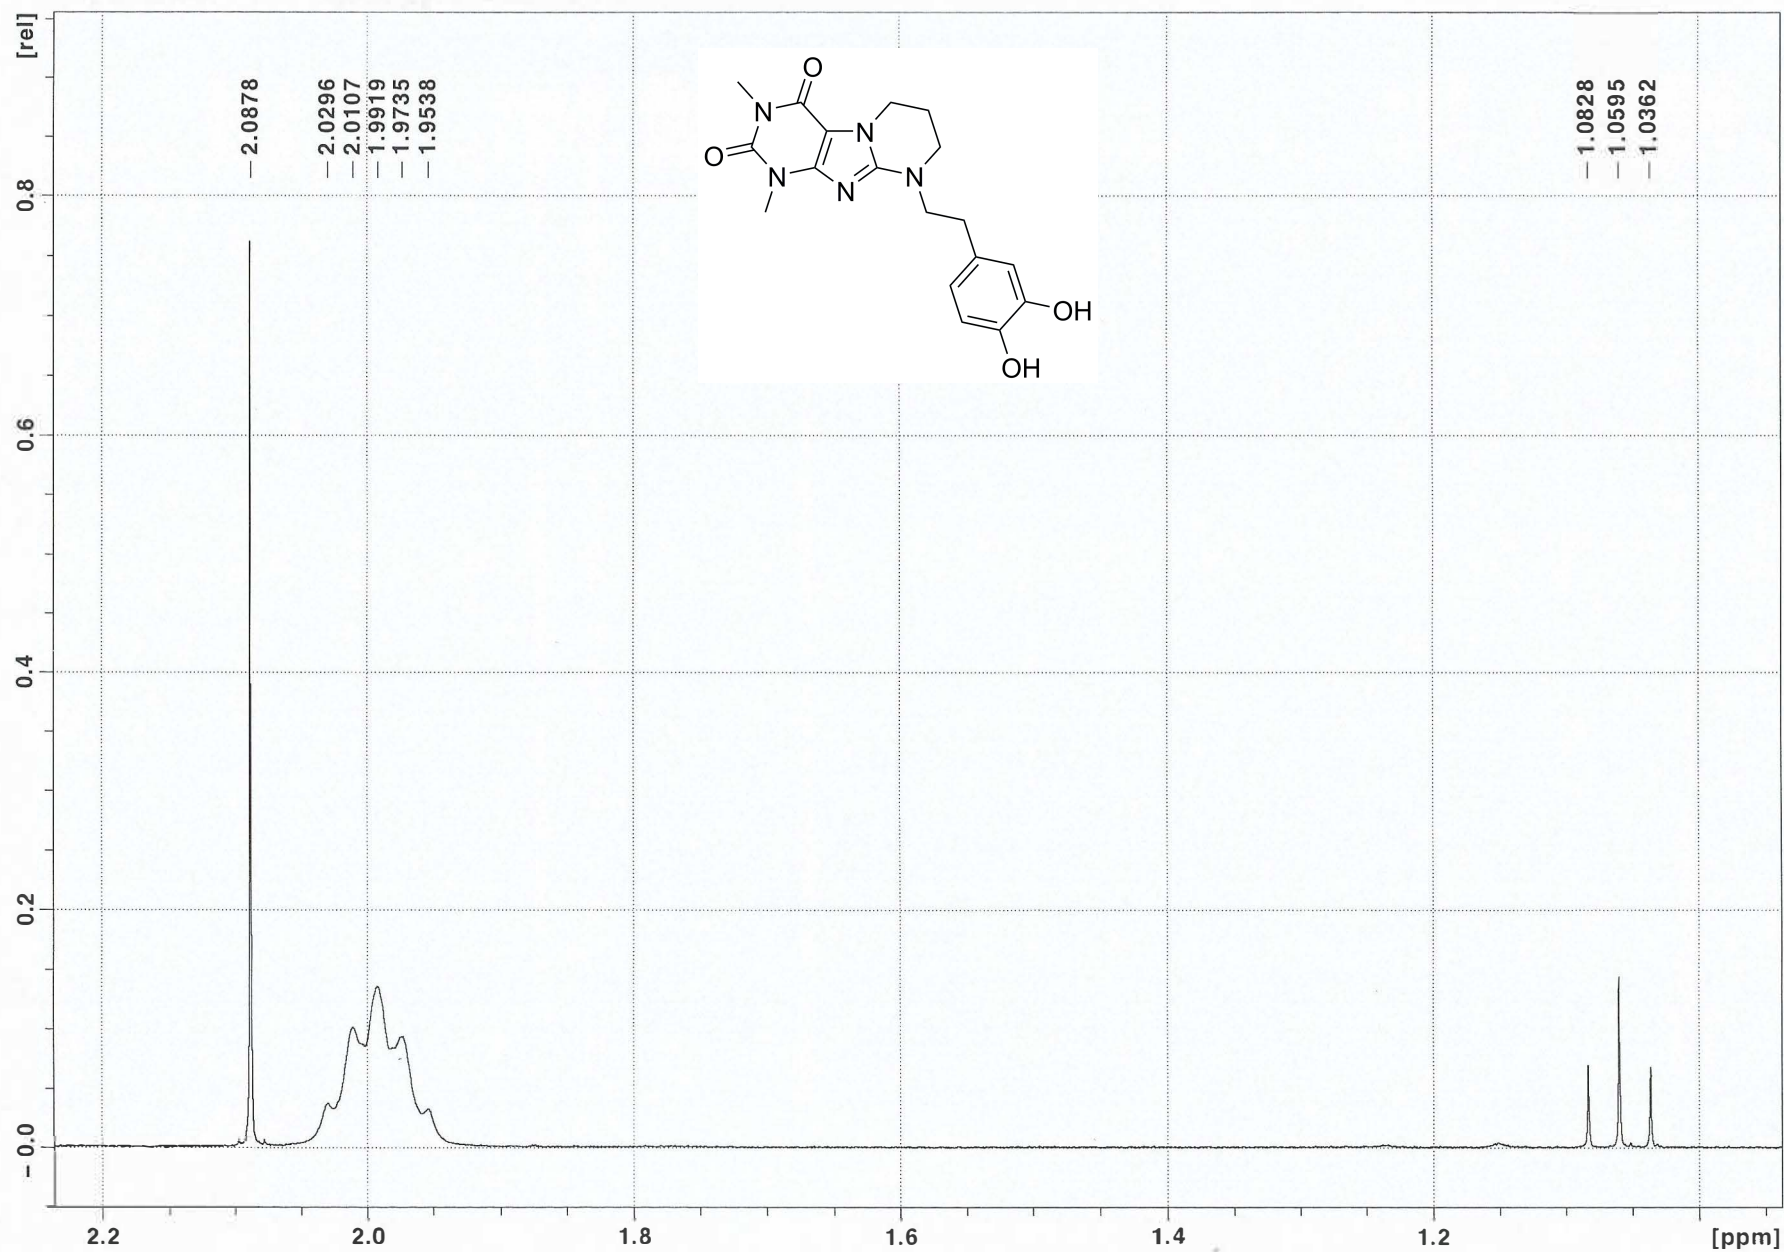

**Compound 20a**  
 **$^1\text{H}$  NMR - zoom of the**  
**aliphatic region**

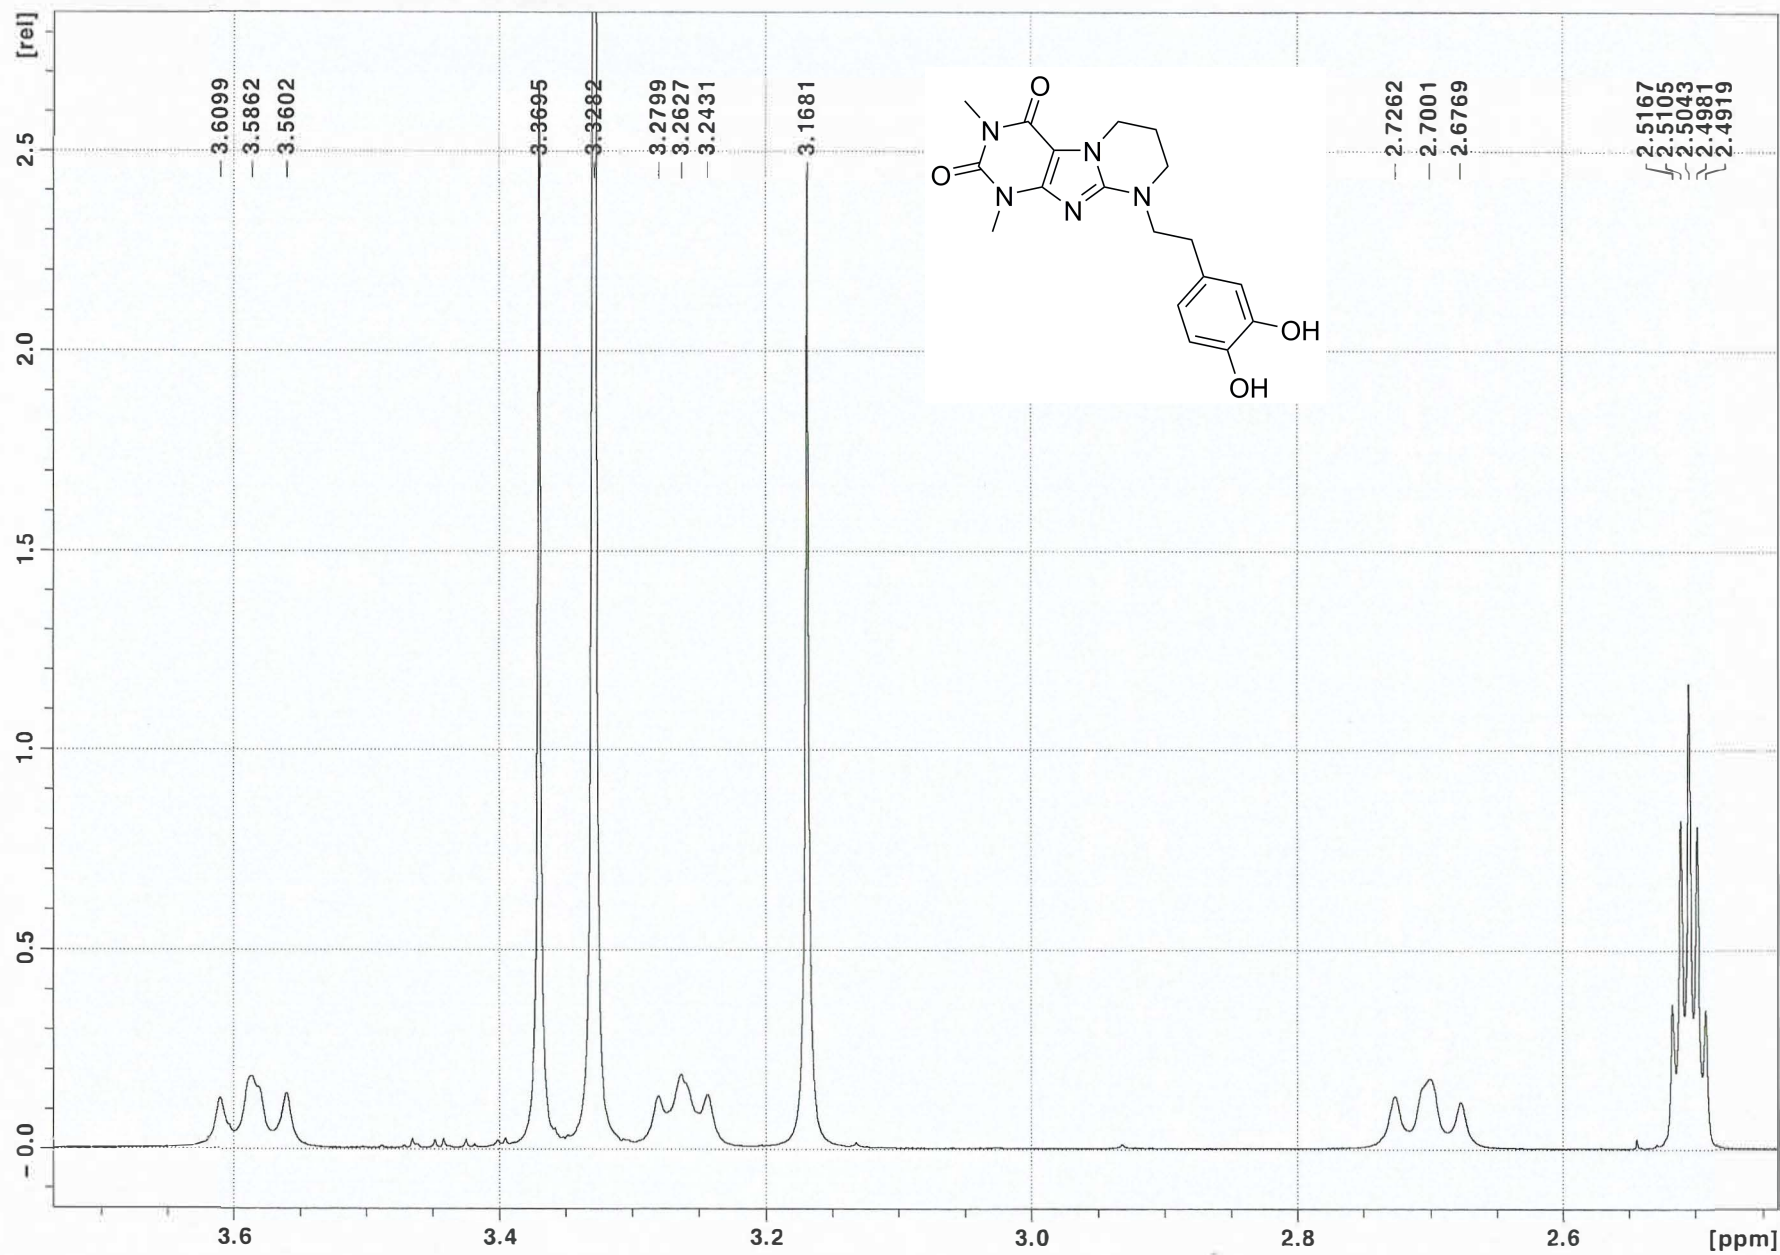

**Compound 20a**  
 **$^1\text{H}$  NMR - zoom of the**  
**aliphatic region**

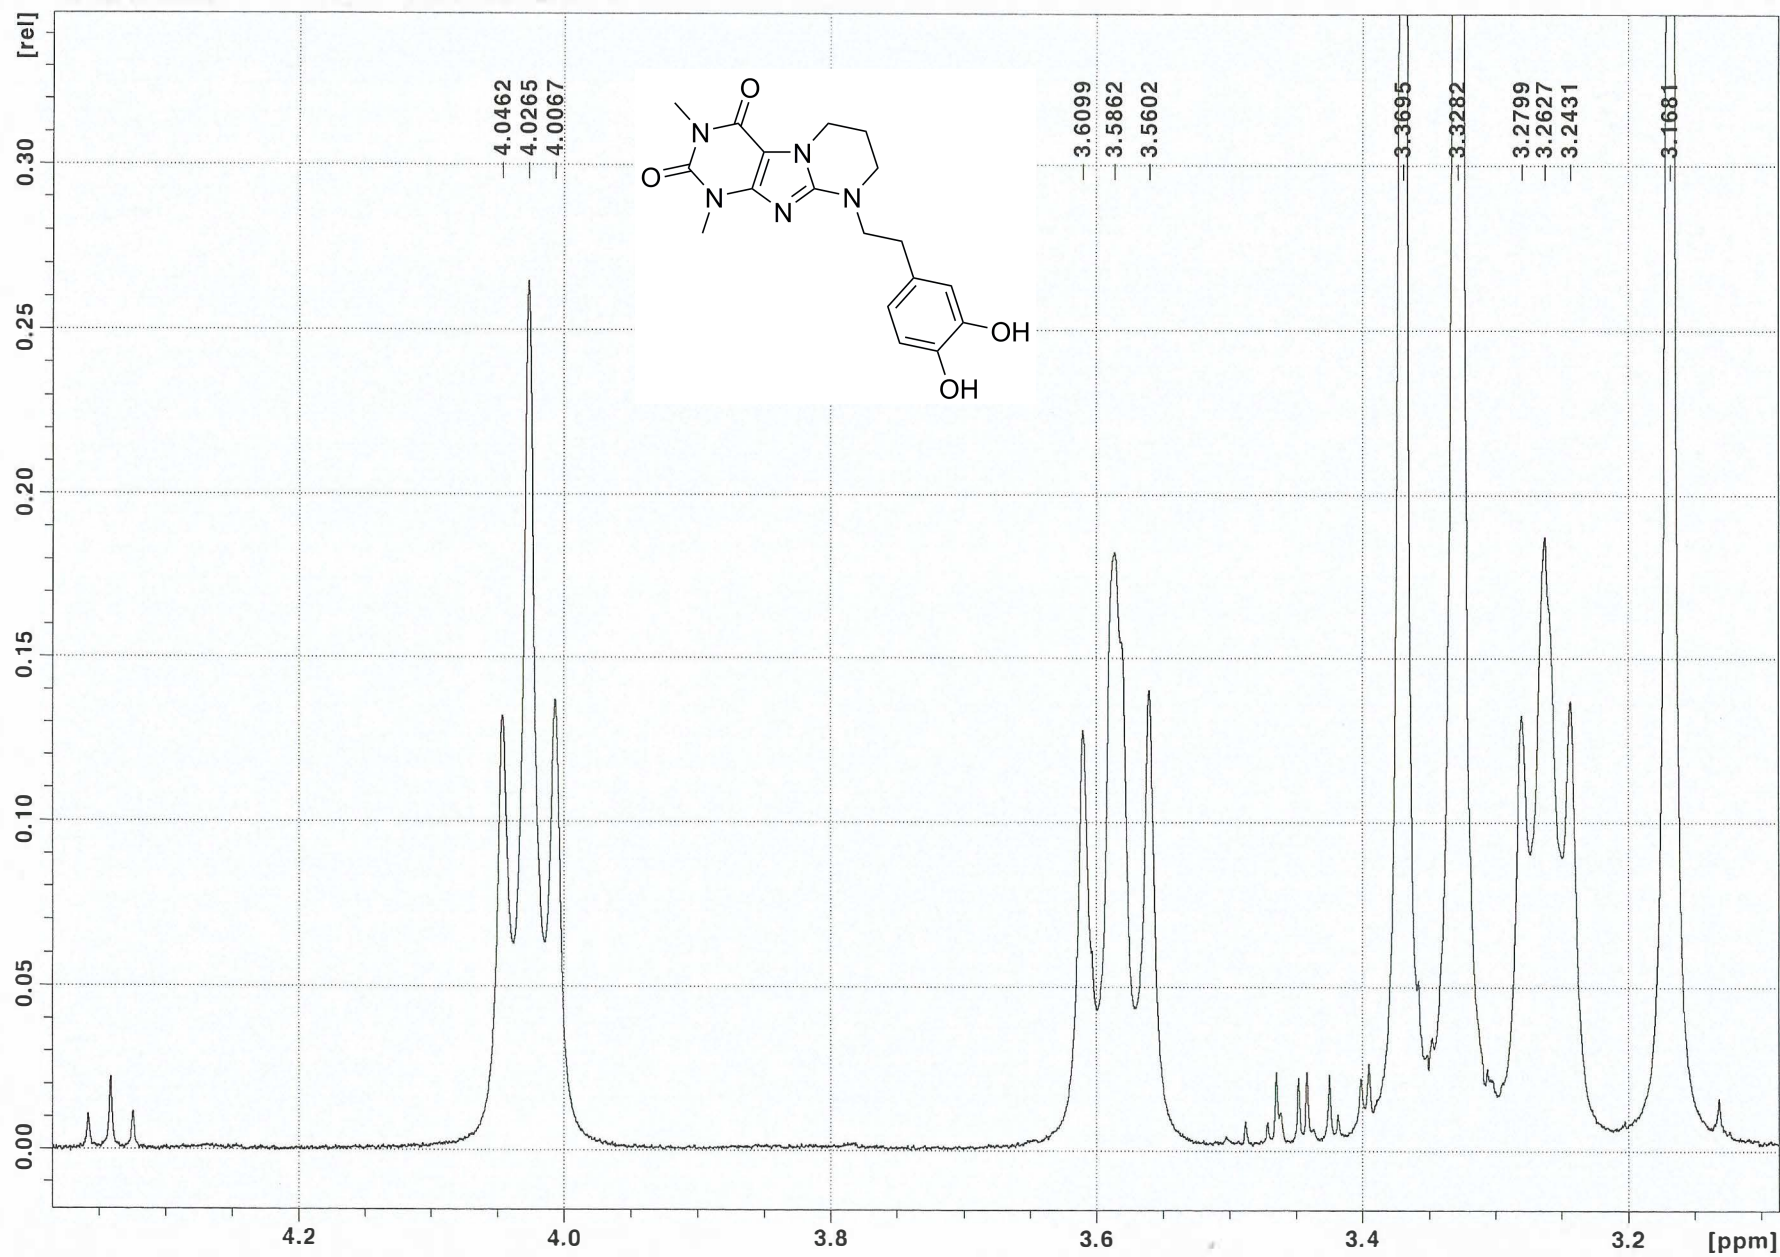

**Compound 20a**  
 **$^1\text{H}$  NMR - zoom of the**  
**aromatic region**

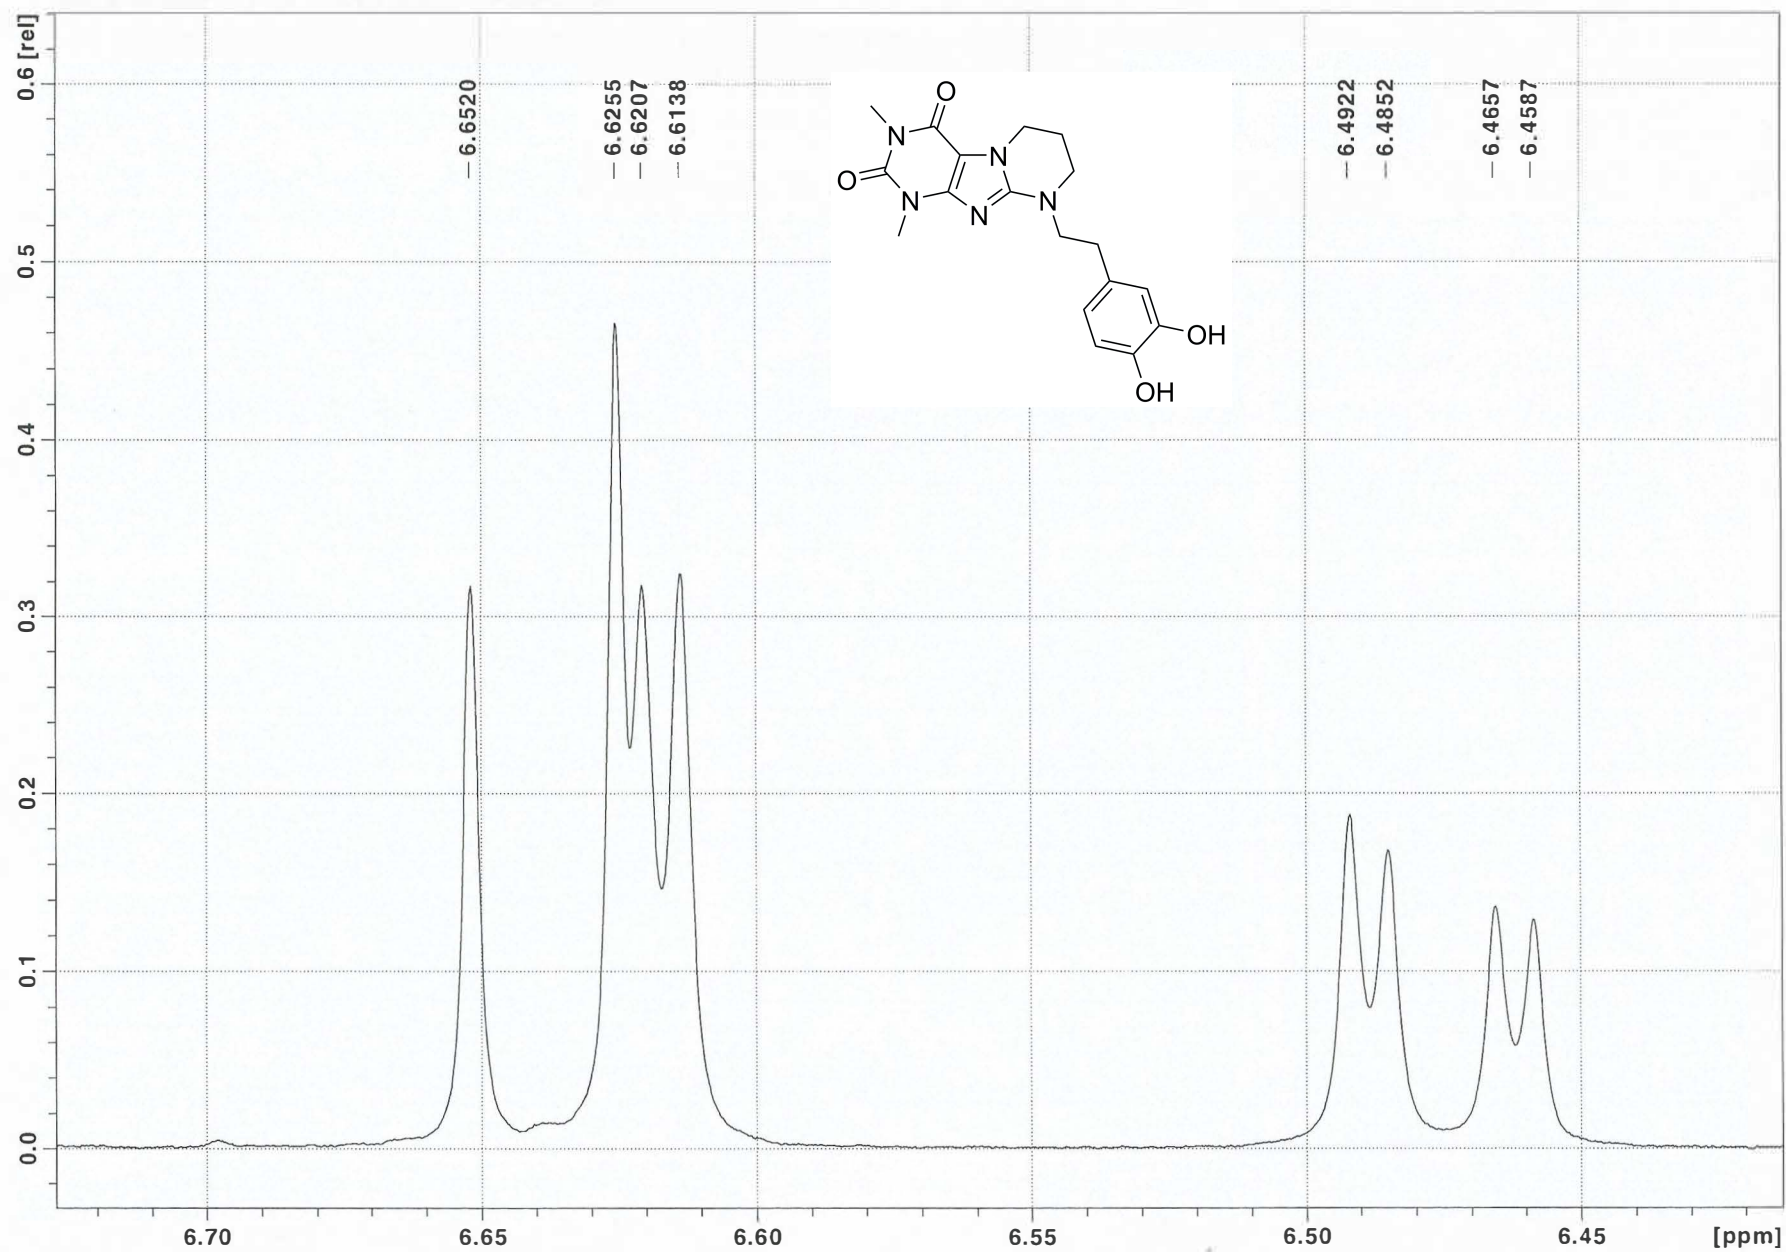

**Compound 20a**  
 **$^1\text{H}$  NMR - zoom of the**  
**aromatic region**

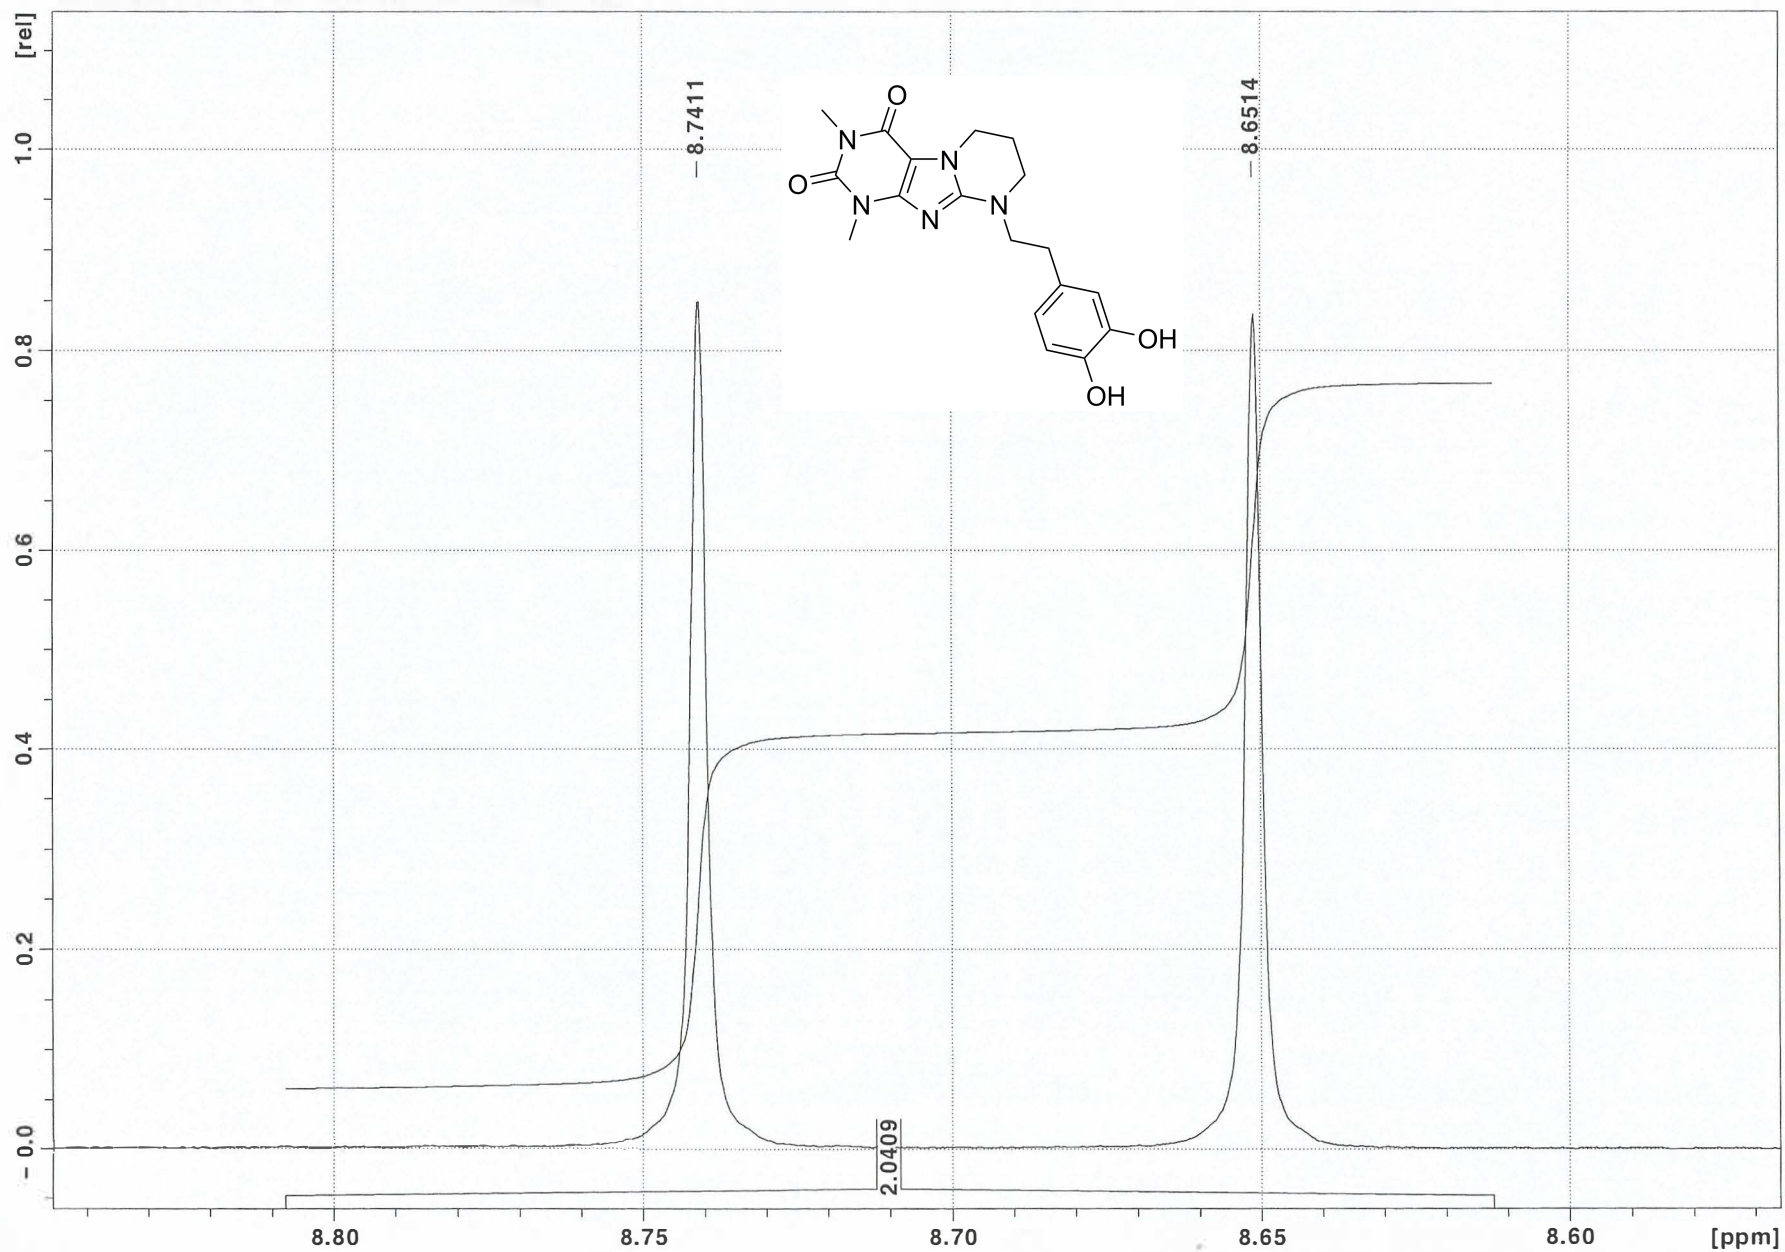

## Table of peaks

| Peak | $\nu(\text{F1})$ [ppm] | $\nu(\text{F1})$ [Hz] | Intensity |
|------|------------------------|-----------------------|-----------|
| 1    | 8.7411                 | 2623.4663             | 0.84      |
| 2    | 8.6514                 | 2596.5447             | 0.82      |
| 3    | 6.6520                 | 1996.4648             | 0.31      |
| 4    | 6.6255                 | 1988.5113             | 0.46      |
| 5    | 6.6207                 | 1987.0707             | 0.31      |
| 6    | 6.6138                 | 1984.9998             | 0.32      |
| 7    | 6.4922                 | 1948.5040             | 0.19      |
| 8    | 6.4852                 | 1946.4031             | 0.17      |
| 9    | 6.4657                 | 1940.5505             | 0.13      |
| 10   | 6.4587                 | 1938.4496             | 0.13      |
| 11   | 4.0462                 | 1214.3860             | 0.13      |
| 12   | 4.0265                 | 1208.4734             | 0.26      |
| 13   | 4.0067                 | 1202.5309             | 0.14      |
| 14   | 3.6099                 | 1083.4393             | 0.13      |
| 15   | 3.5862                 | 1076.3262             | 0.18      |
| 16   | 3.5602                 | 1068.5228             | 0.14      |
| 17   | 3.3695                 | 1011.2880             | 2.68      |
| 18   | 3.3282                 | 998.8927              | 15.00     |
| 19   | 3.2799                 | 984.3964              | 0.13      |
| 20   | 3.2627                 | 979.2342              | 0.18      |
| 21   | 3.2431                 | 973.3516              | 0.13      |
| 22   | 3.1681                 | 950.8419              | 2.45      |
| 23   | 2.7262                 | 818.2144              | 0.13      |
| 24   | 2.7001                 | 810.3810              | 0.18      |
| 25   | 2.6769                 | 803.4180              | 0.12      |
| 26   | 2.5167                 | 755.3372              | 0.36      |
| 27   | 2.5105                 | 753.4764              | 0.81      |
| 28   | 2.5043                 | 751.6156              | 1.15      |
| 29   | 2.4981                 | 749.7548              | 0.80      |
| 30   | 2.4919                 | 747.8939              | 0.34      |
| 31   | 2.0878                 | 626.6114              | 0.76      |
| 32   | 2.0296                 | 609.1438              | 0.04      |
| 33   | 2.0107                 | 603.4714              | 0.10      |
| 34   | 1.9919                 | 597.8289              | 0.13      |
| 35   | 1.9735                 | 592.3066              | 0.09      |
| 36   | 1.9538                 | 586.3940              | 0.03      |
| 37   | 1.0828                 | 324.9808              | 0.07      |
| 38   | 1.0595                 | 317.9877              | 0.14      |
| 39   | 1.0362                 | 310.9947              | 0.00      |

# Compound 20a <sup>13</sup>C NMR

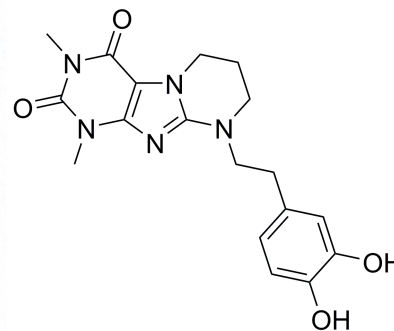

| No. | (ppm)  | (Hz)    | Height |
|-----|--------|---------|--------|
| 1   | 21.15  | 2128.6  | 0.0830 |
| 2   | 27.60  | 2777.8  | 0.1235 |
| 3   | 29.75  | 2994.2  | 0.1513 |
| 4   | 32.93  | 3313.4  | 0.0859 |
| 5   | 39.35  | 3960.4  | 0.1422 |
| 6   | 39.56  | 3980.9  | 0.4364 |
| 7   | 39.77  | 4002.2  | 0.8793 |
| 8   | 39.98  | 4023.5  | 1.0000 |
| 9   | 40.19  | 4044.0  | 0.8772 |
| 10  | 40.40  | 4065.3  | 0.4377 |
| 11  | 40.60  | 4085.8  | 0.1402 |
| 12  | 41.75  | 4201.7  | 0.0752 |
| 13  | 44.78  | 4506.2  | 0.0786 |
| 14  | 51.38  | 5170.8  | 0.0819 |
| 15  | 102.20 | 10284.7 | 0.0735 |
| 16  | 116.00 | 11673.4 | 0.1017 |
| 17  | 116.55 | 11729.2 | 0.1105 |
| 18  | 119.81 | 12056.4 | 0.1006 |
| 19  | 130.21 | 13103.2 | 0.0956 |
| 20  | 144.05 | 14496.3 | 0.1031 |
| 21  | 145.57 | 14648.9 | 0.1004 |
| 22  | 148.83 | 14976.8 | 0.0719 |
| 23  | 151.45 | 15240.9 | 0.0732 |
| 24  | 151.67 | 15262.9 | 0.0816 |
| 25  | 152.99 | 15395.7 | 0.0836 |

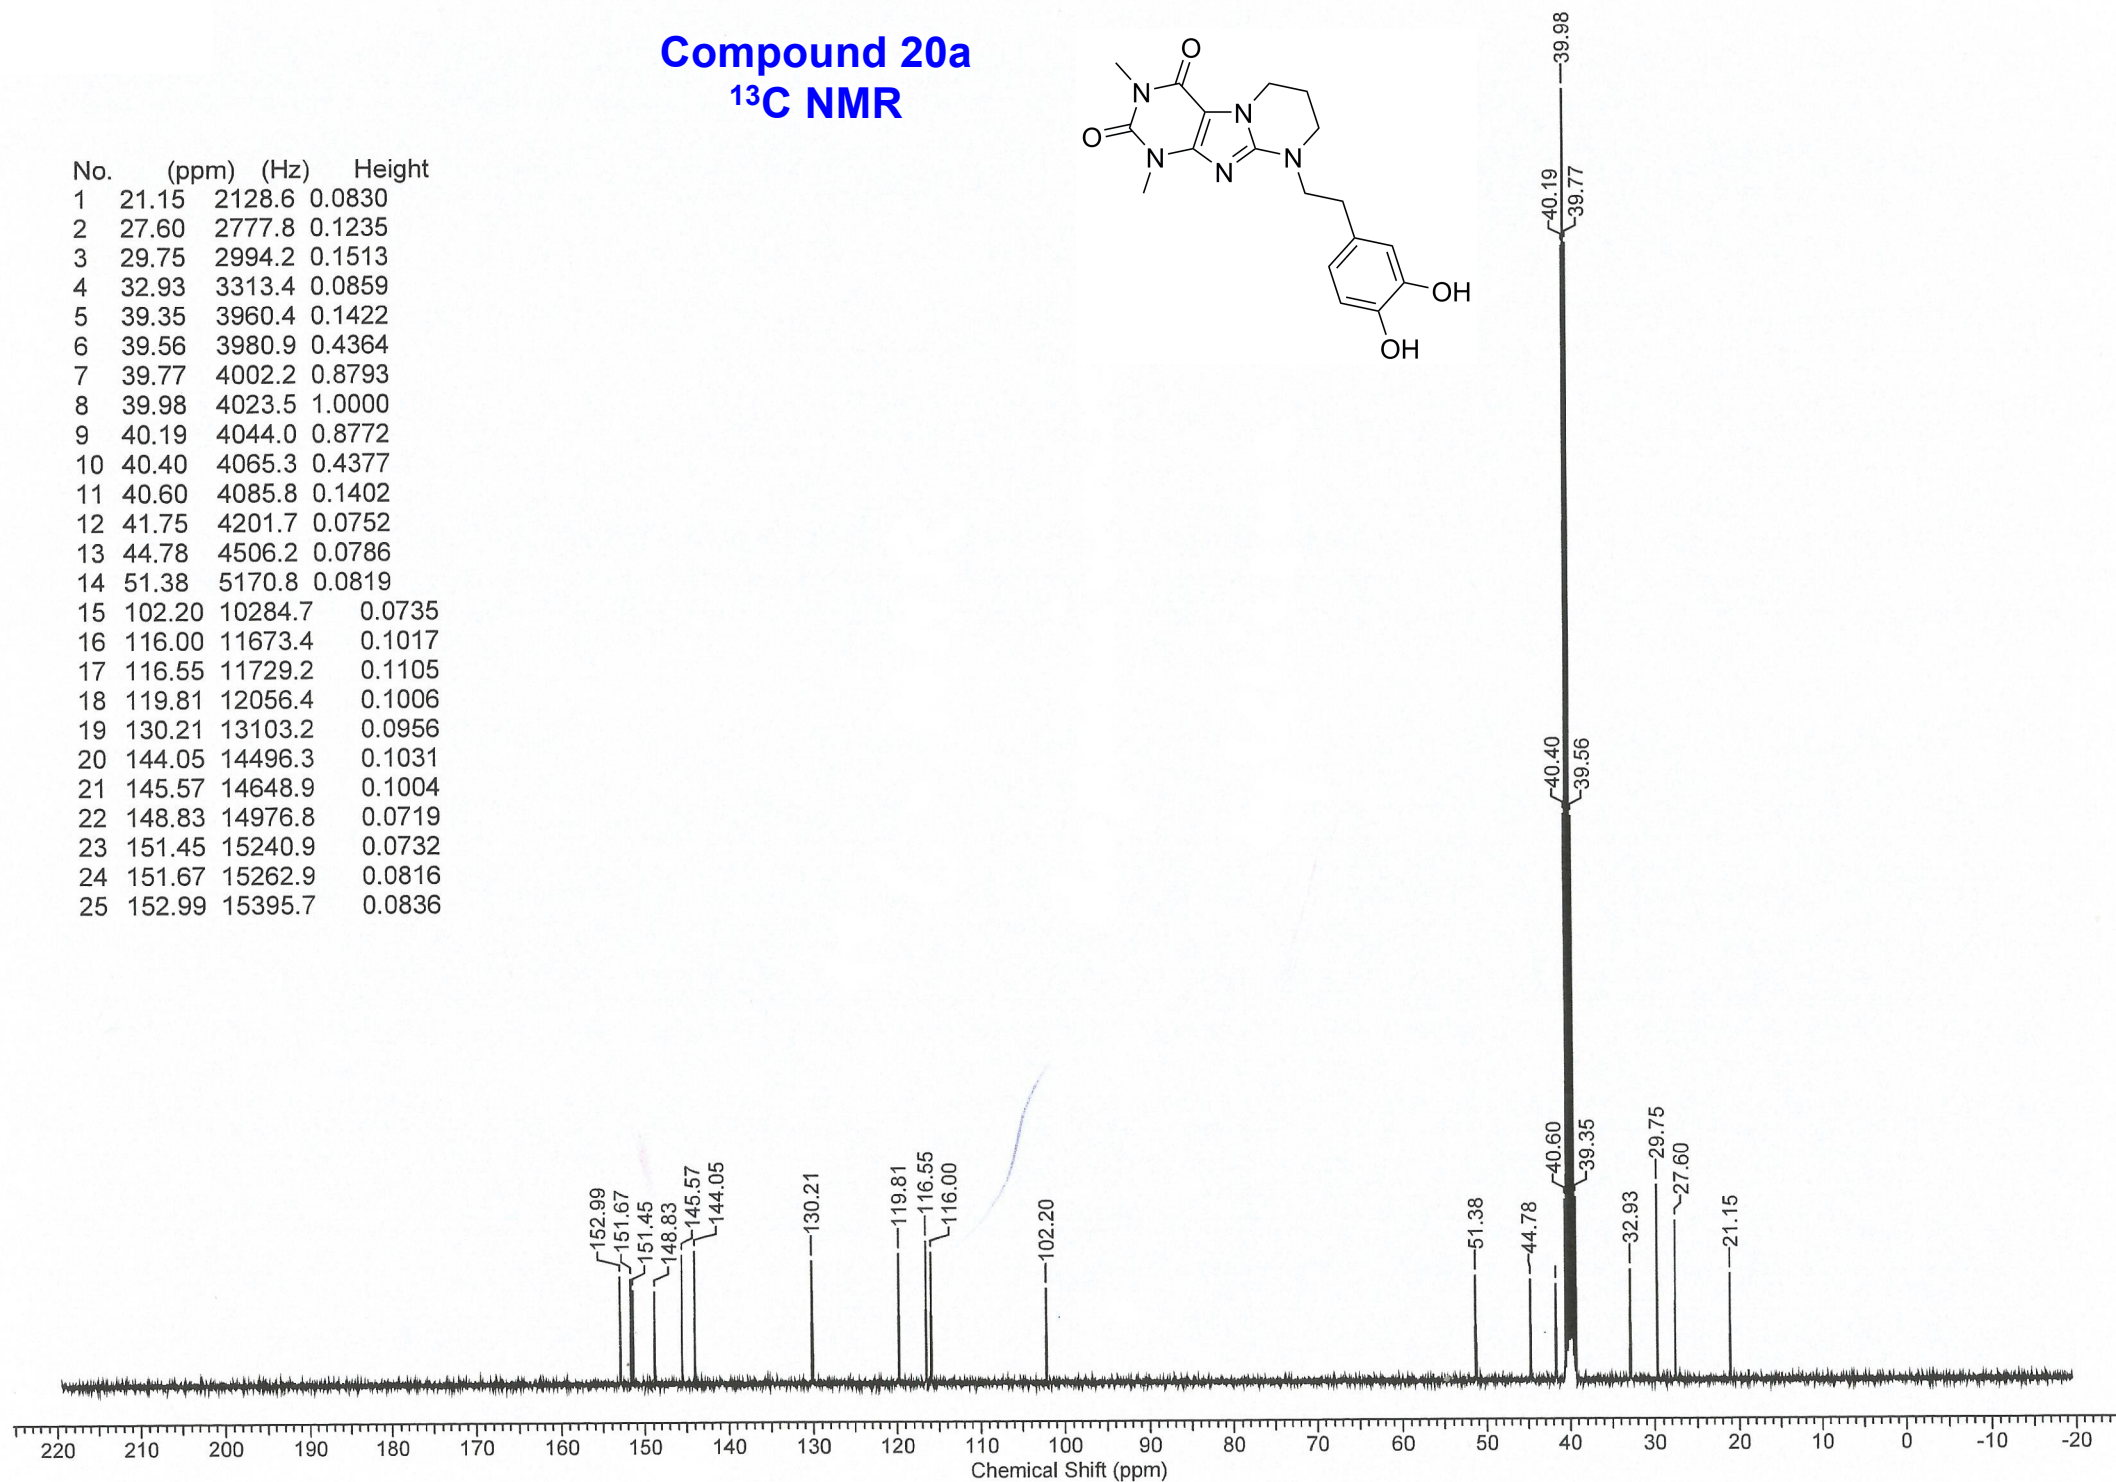

**Compound 20b**  
 **$^1\text{H}$  NMR - zoom of the**  
**aromatic region**

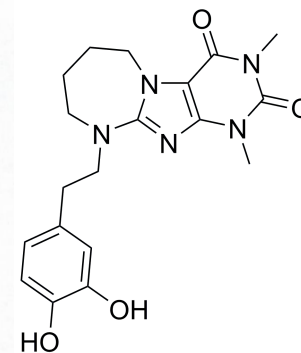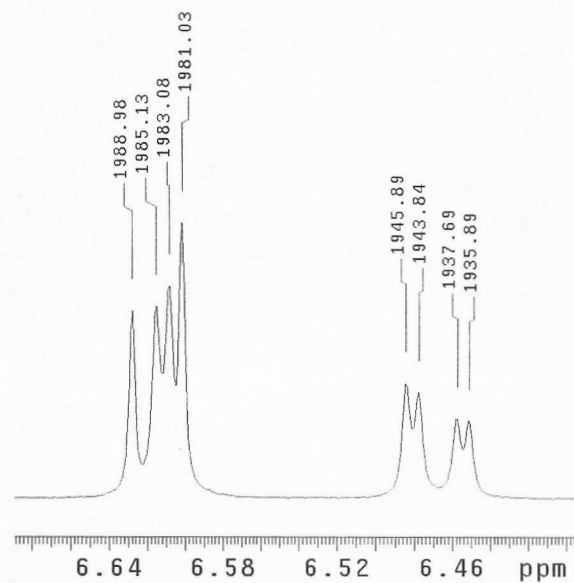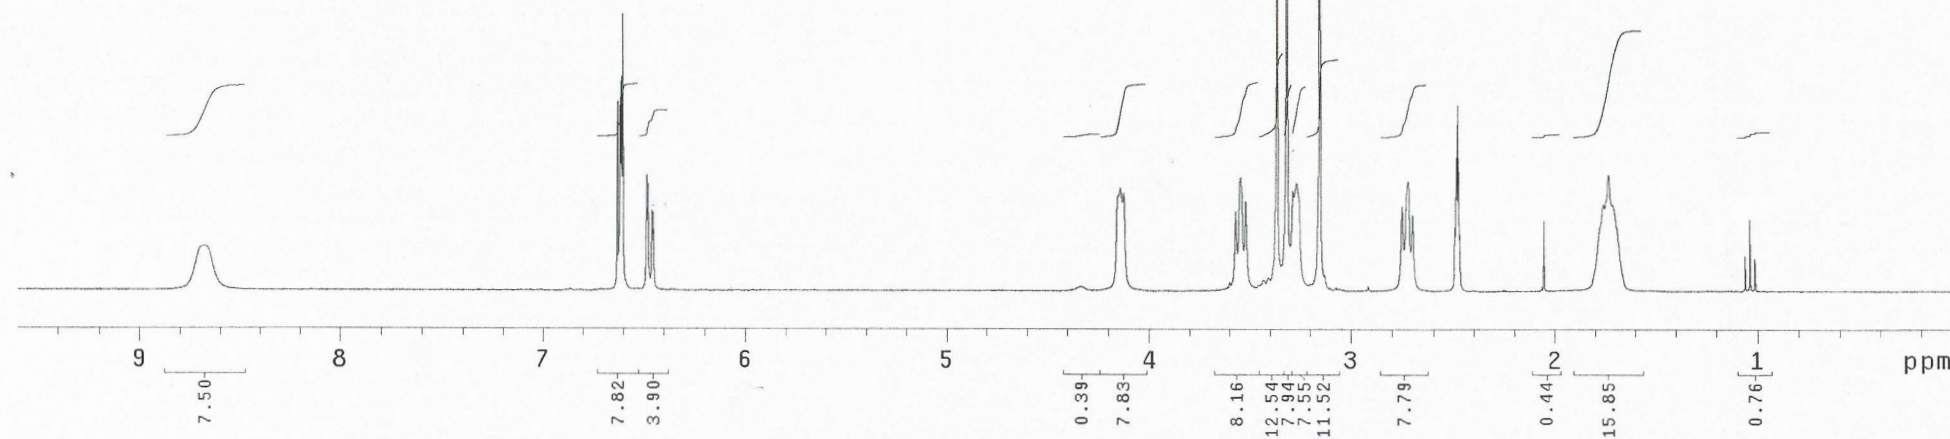

**Compound 20b**  
**<sup>1</sup>H NMR - zoom of the**  
**aliphatic region**

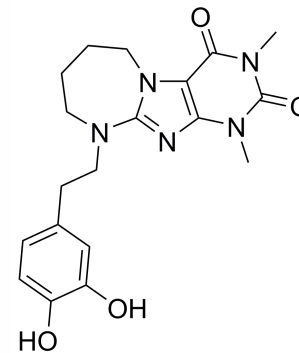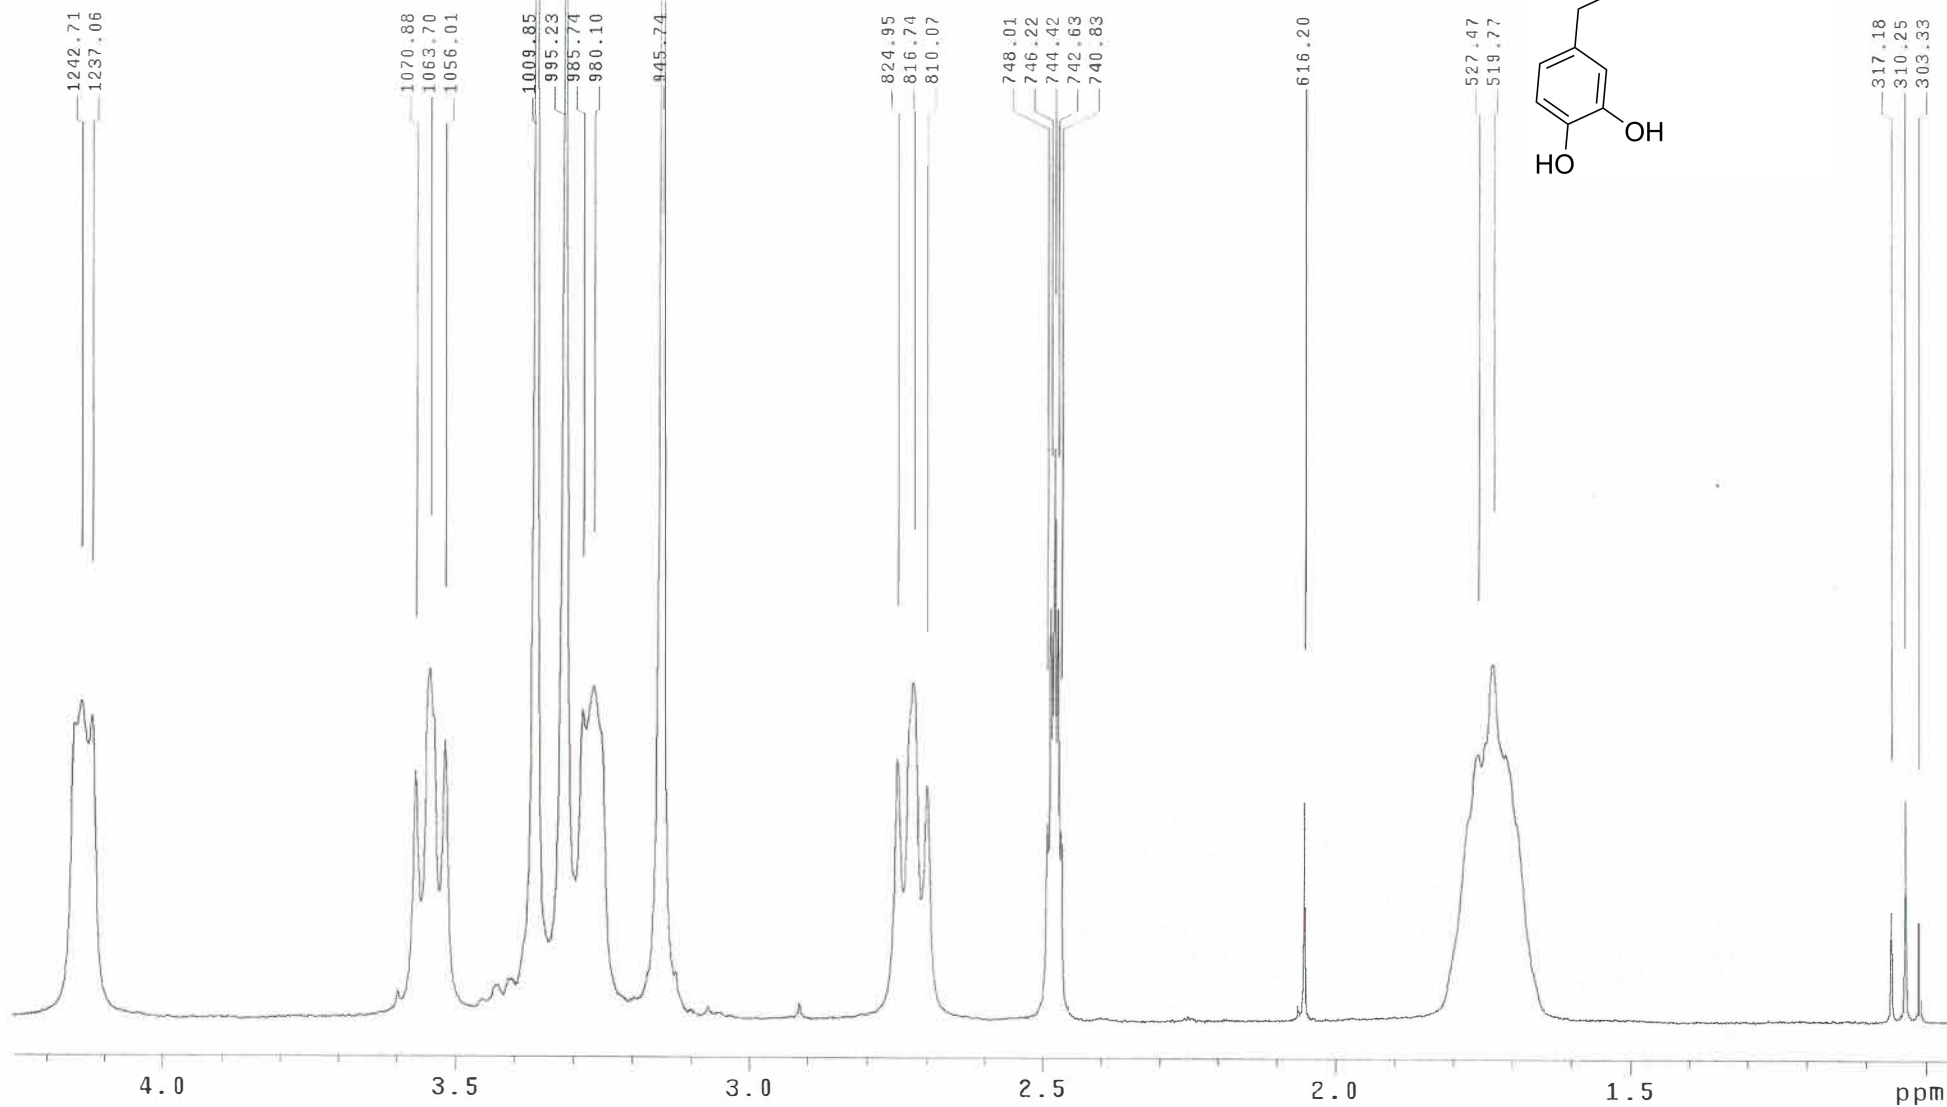

## Table of peaks

| INDEX | FREQUENCY | PPM   | HEIGHT |
|-------|-----------|-------|--------|
| 1     | 2603.687  | 8.677 | 5.7    |
| 2     | 1988.975  | 6.628 | 24.5   |
| 3     | 1985.129  | 6.615 | 25.0   |
| 4     | 1983.077  | 6.608 | 27.8   |
| 5     | 1981.025  | 6.602 | 35.9   |
| 6     | 1945.892  | 6.485 | 15.0   |
| 7     | 1943.840  | 6.478 | 13.9   |
| 8     | 1937.685  | 6.457 | 10.5   |
| 9     | 1935.890  | 6.451 | 10.2   |
| 10    | 1242.705  | 4.141 | 13.3   |
| 11    | 1237.063  | 4.122 | 12.7   |
| 12    | 1070.884  | 3.569 | 10.4   |
| 13    | 1063.703  | 3.545 | 14.7   |
| 14    | 1056.019  | 3.519 | 11.7   |
| 15    | 1009.848  | 3.365 | 144.0  |
| 16    | 995.231   | 3.317 | 50.7   |
| 17    | 985.742   | 3.285 | 13.0   |
| 18    | 980.100   | 3.266 | 14.0   |
| 19    | 945.736   | 3.152 | 132.7  |
| 20    | 824.948   | 2.749 | 11.0   |
| 21    | 816.741   | 2.722 | 14.2   |
| 22    | 810.074   | 2.700 | 9.9    |
| 23    | 748.013   | 2.493 | 8.3    |
| 24    | 746.218   | 2.487 | 17.4   |
| 25    | 744.422   | 2.481 | 24.1   |
| 26    | 742.627   | 2.475 | 17.3   |
| 27    | 740.832   | 2.469 | 7.9    |
| 28    | 616.197   | 2.053 | 9.2    |
| 29    | 527.465   | 1.758 | 11.3   |
| 30    | 519.772   | 1.732 | 15.1   |
| 31    | 317.176   | 1.057 | 4.6    |
| 32    | 310.252   | 1.034 | 9.3    |
| 33    | 303.328   | 1.011 | 4.2    |

# Compound 20b

## <sup>13</sup>C NMR

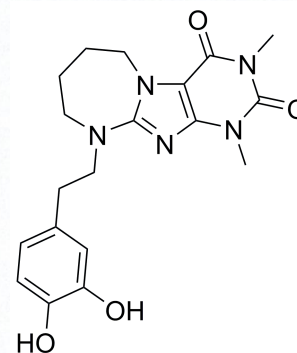

| No. | (ppm)  | (Hz)    | Height |
|-----|--------|---------|--------|
| 1   | 26.25  | 2641.4  | 0.1047 |
| 2   | 27.71  | 2788.1  | 0.1541 |
| 3   | 28.74  | 2892.3  | 0.1037 |
| 4   | 29.72  | 2990.6  | 0.1667 |
| 5   | 33.18  | 3339.0  | 0.0958 |
| 6   | 39.35  | 3960.4  | 0.1362 |
| 7   | 39.57  | 3981.7  | 0.4146 |
| 8   | 39.77  | 4002.2  | 0.8515 |
| 9   | 39.98  | 4023.5  | 1.0000 |
| 10  | 40.19  | 4044.0  | 0.8359 |
| 11  | 40.40  | 4065.3  | 0.4266 |
| 12  | 40.61  | 4086.6  | 0.1376 |
| 13  | 45.75  | 4603.8  | 0.0863 |
| 14  | 51.59  | 5191.4  | 0.0898 |
| 15  | 55.11  | 5545.7  | 0.0962 |
| 16  | 103.49 | 10414.6 | 0.0940 |
| 17  | 115.95 | 11668.3 | 0.1383 |
| 18  | 116.64 | 11738.0 | 0.1447 |
| 19  | 119.86 | 12062.2 | 0.1350 |
| 20  | 130.53 | 13135.5 | 0.1127 |
| 21  | 143.96 | 14487.5 | 0.1493 |
| 22  | 145.51 | 14643.0 | 0.1440 |
| 23  | 148.18 | 14911.5 | 0.1028 |
| 24  | 151.38 | 15233.6 | 0.0935 |
| 25  | 153.70 | 15466.8 | 0.0904 |
| 26  | 158.95 | 15995.8 | 0.1352 |

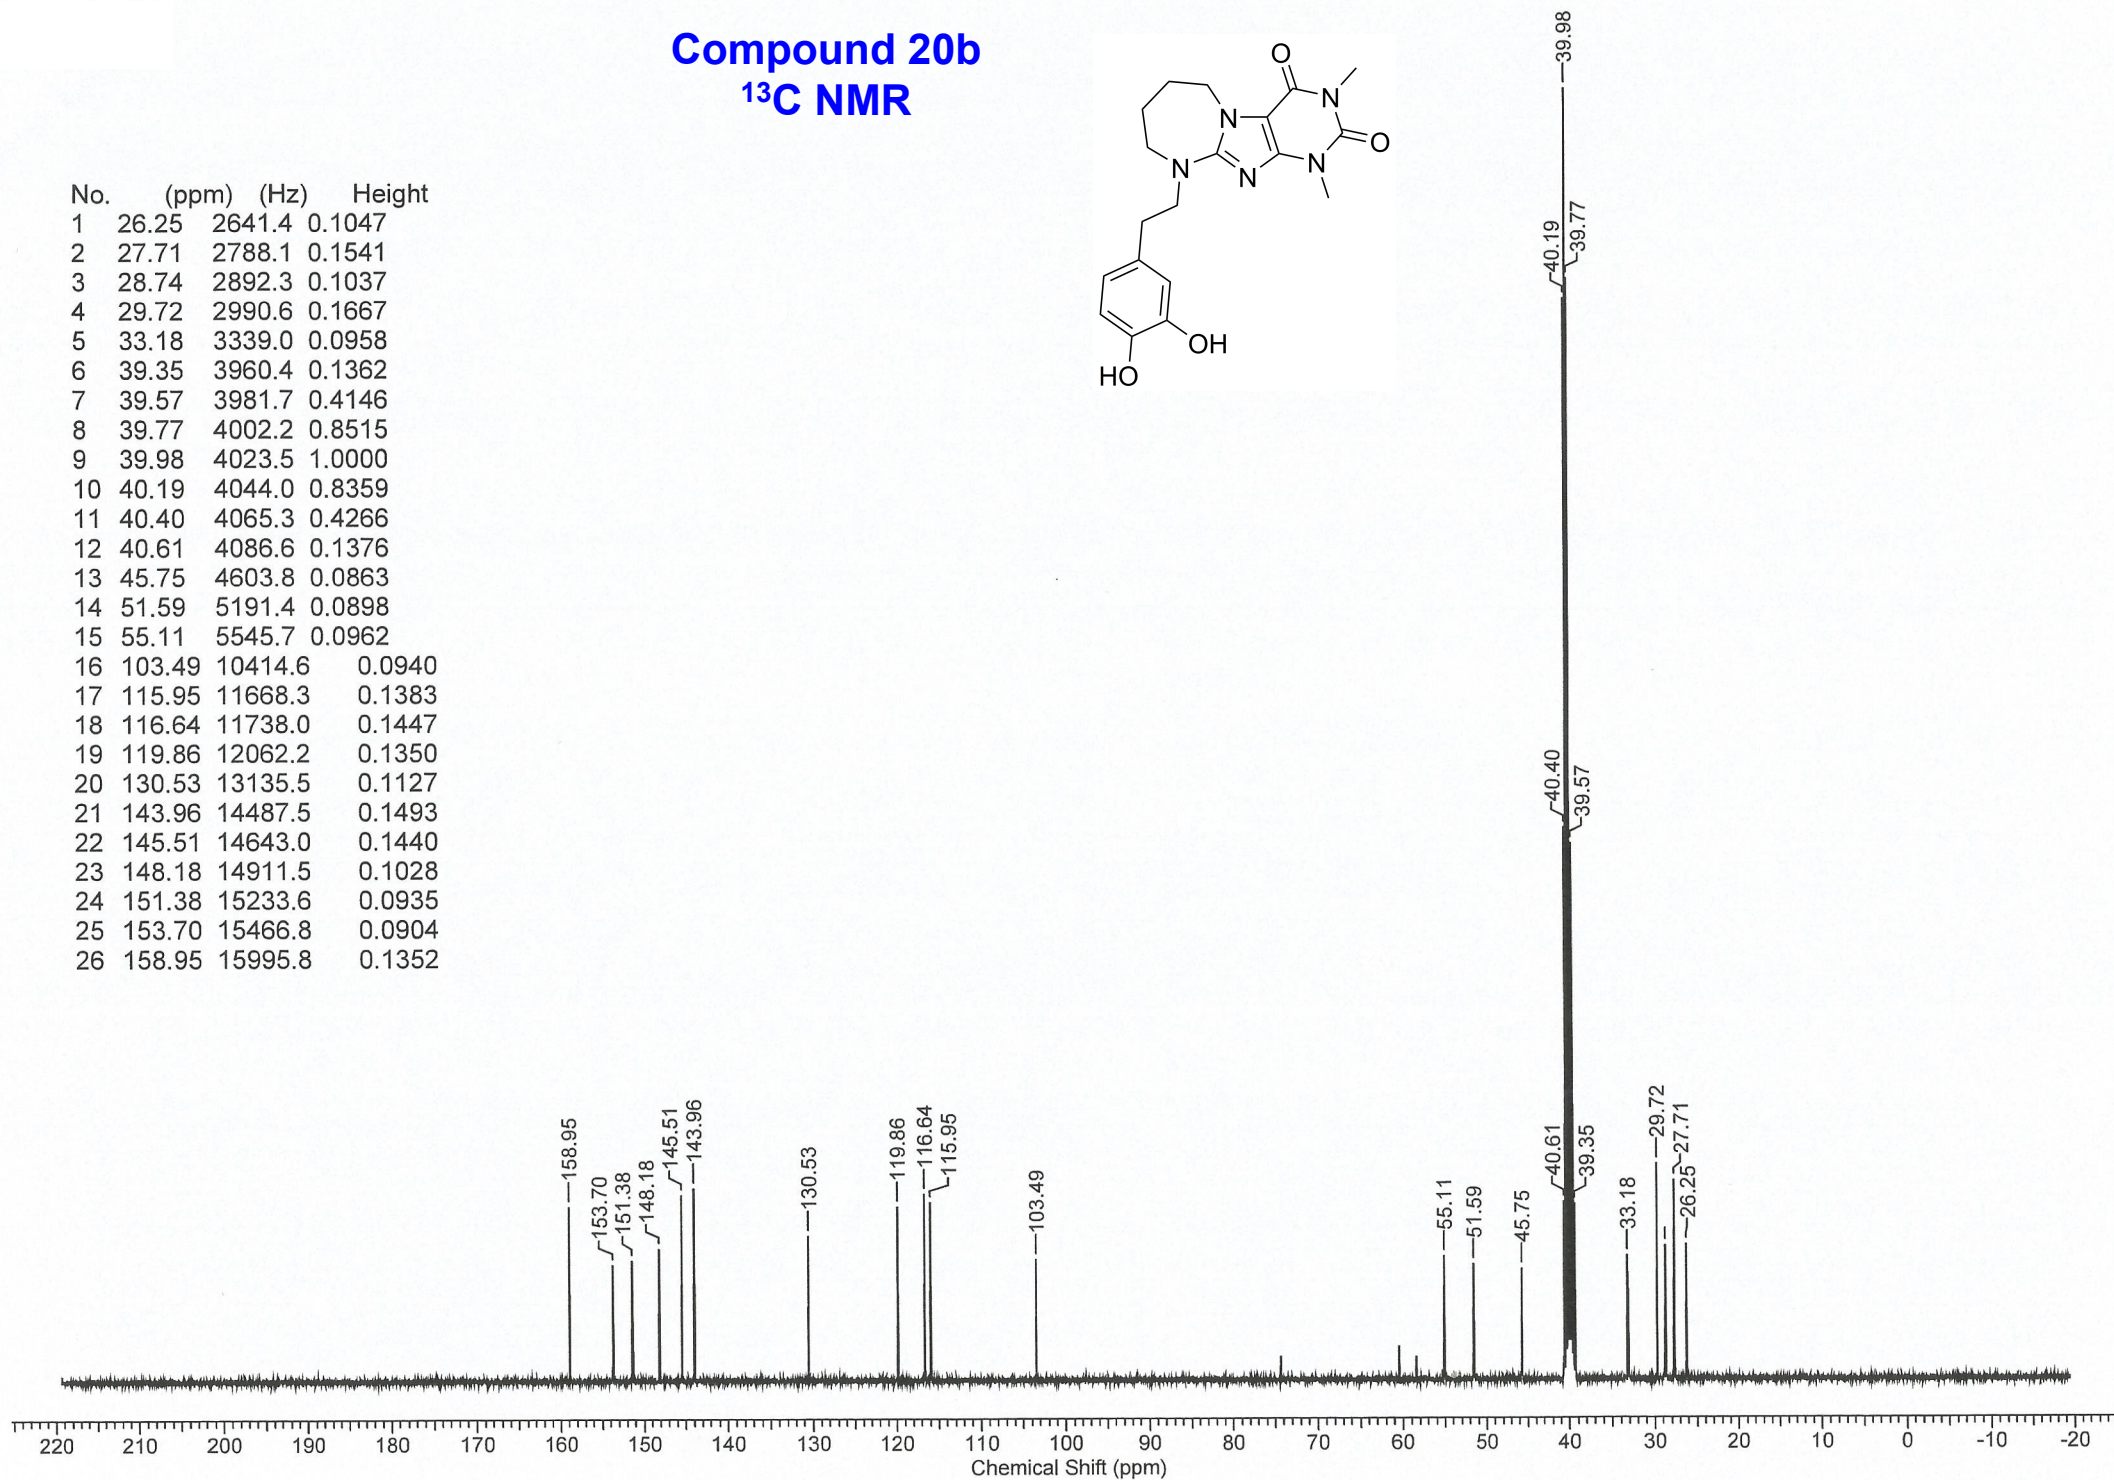

**Compound 21**  
 **$^1\text{H}$  NMR - zoom of the**  
**aromatic region**

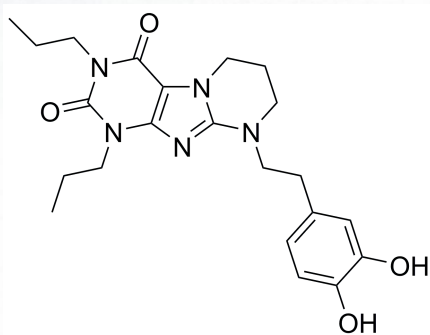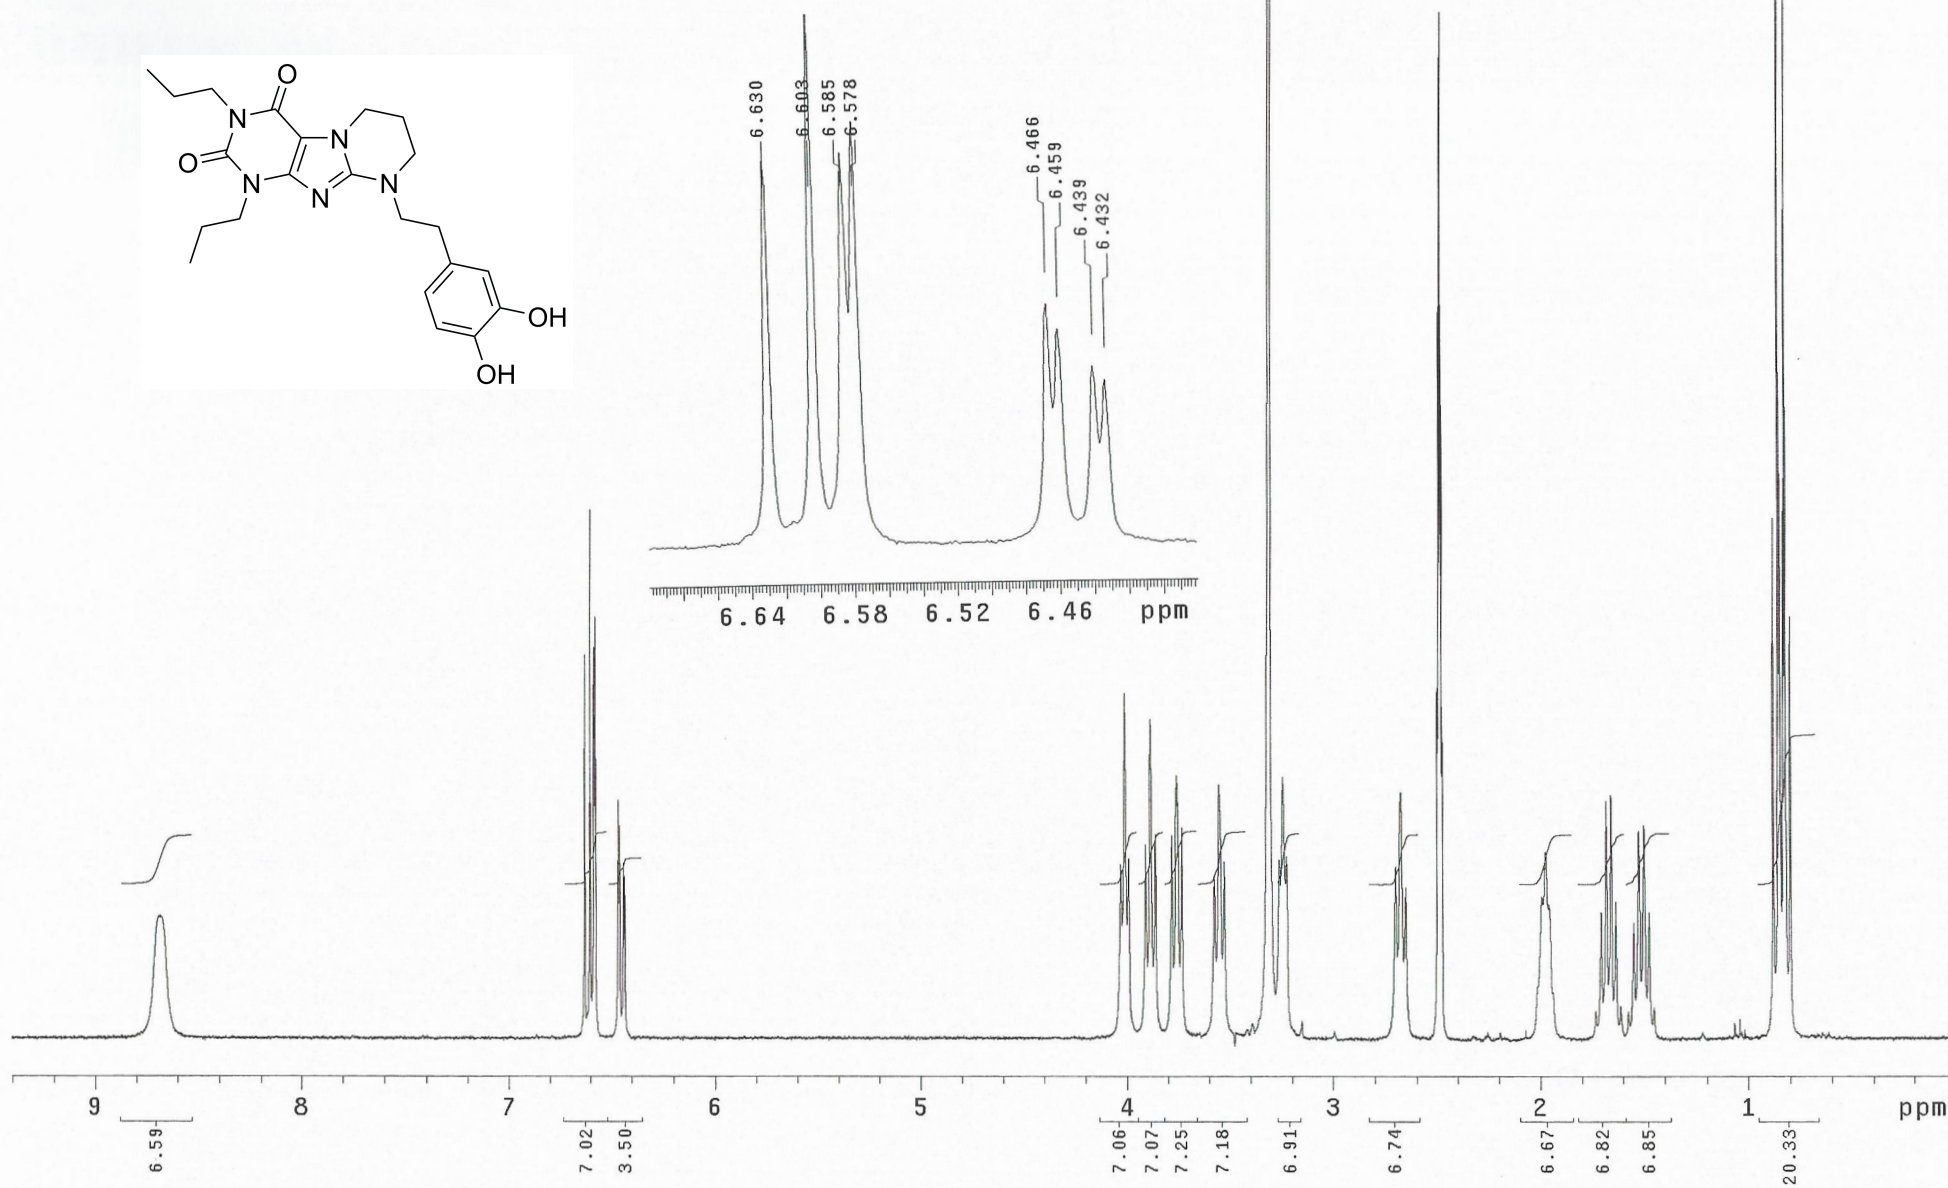

**Compound 21**  
 **$^1\text{H}$  NMR - zoom of the**  
**aliphatic region**

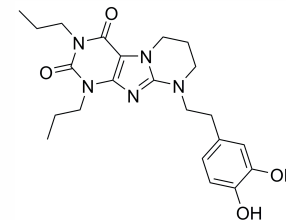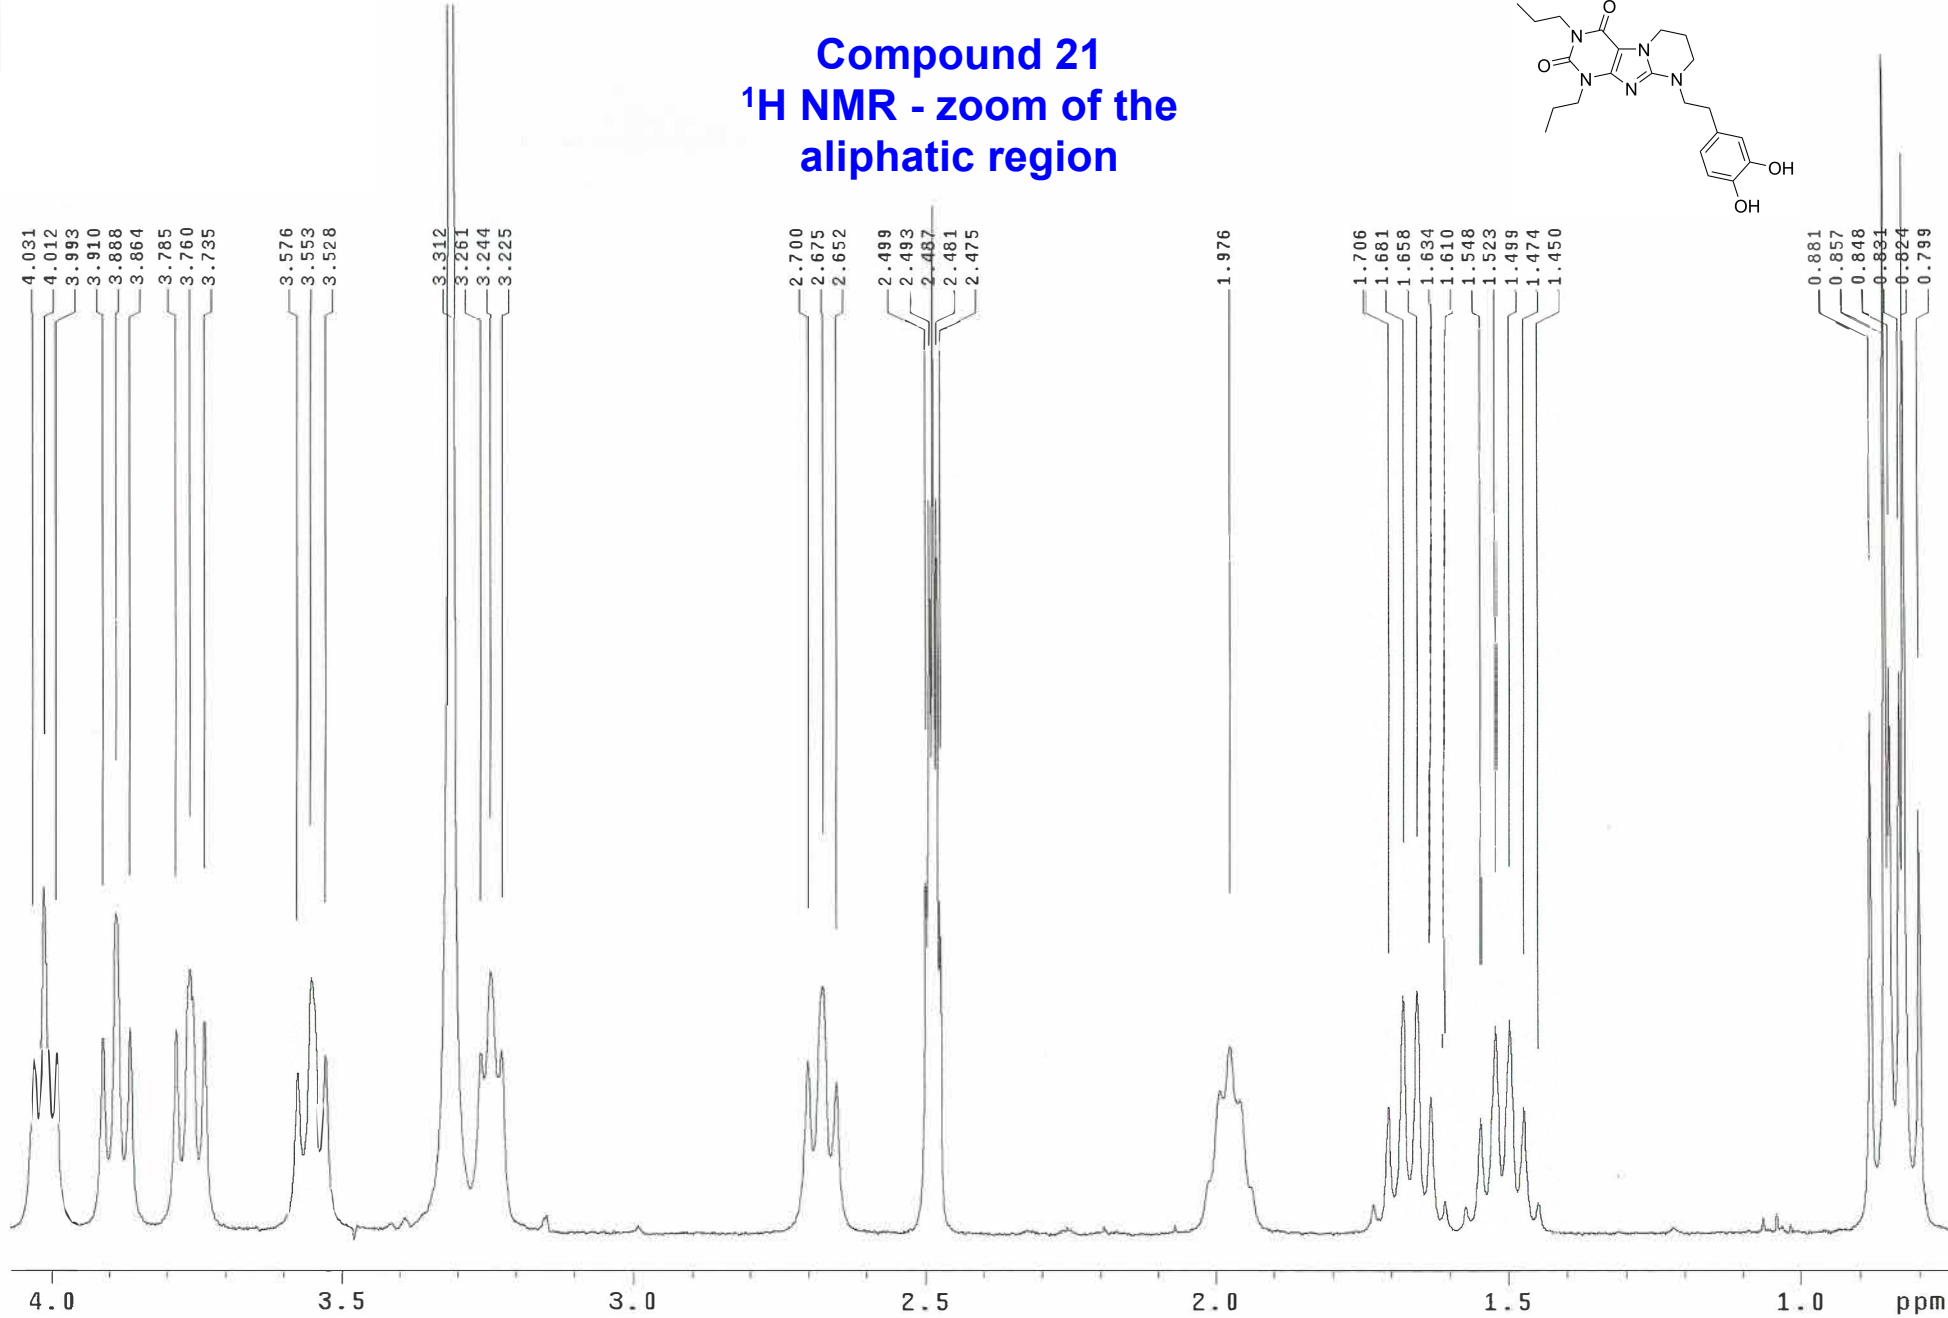

## Table of peaks

| INDEX | FREQUENCY | PPM   | HEIGHT | INDEX | FREQUENCY | PPM   | HEIGHT |
|-------|-----------|-------|--------|-------|-----------|-------|--------|
| 1     | 2605.995  | 8.684 | 15.9   | 40    | 497.461   | 1.658 | 31.6   |
| 2     | 1989.488  | 6.630 | 49.9   | 41    | 490.280   | 1.634 | 17.7   |
| 3     | 1981.538  | 6.603 | 68.8   | 42    | 483.100   | 1.610 | 4.1    |
| 4     | 1975.896  | 6.585 | 50.8   | 43    | 471.816   | 1.572 | 3.5    |
| 5     | 1973.845  | 6.578 | 54.8   | 44    | 464.379   | 1.548 | 14.9   |
| 6     | 1940.250  | 6.466 | 30.9   | 45    | 456.942   | 1.523 | 26.9   |
| 7     | 1938.198  | 6.459 | 27.6   | 46    | 449.761   | 1.499 | 27.7   |
| 8     | 1932.300  | 6.439 | 22.7   | 47    | 442.324   | 1.474 | 16.3   |
|       | 1930.248  | 6.432 | 21.0   | 48    | 435.143   | 1.450 | 4.0    |
| 10    | 1209.623  | 4.031 | 22.6   | 49    | 264.348   | 0.881 | 67.6   |
| 11    | 1203.981  | 4.012 | 44.9   | 50    | 257.167   | 0.857 | 153.1  |
| 12    | 1198.083  | 3.993 | 23.3   | 51    | 254.602   | 0.848 | 73.5   |
| 13    | 1173.464  | 3.910 | 25.1   | 52    | 249.473   | 0.831 | 72.8   |
| 14    | 1166.796  | 3.888 | 41.5   | 53    | 247.165   | 0.824 | 140.1  |
| 15    | 1159.615  | 3.864 | 26.5   | 54    | 239.728   | 0.799 | 54.8   |
| 16    | 1135.765  | 3.785 | 26.3   |       |           |       |        |
| 17    | 1128.328  | 3.760 | 34.2   |       |           |       |        |
| 18    | 1120.891  | 3.735 | 27.4   |       |           |       |        |
| 19    | 1073.192  | 3.576 | 20.6   |       |           |       |        |
| 20    | 1066.267  | 3.553 | 32.9   |       |           |       |        |
| 21    | 1058.574  | 3.528 | 22.9   |       |           |       |        |
| 22    | 993.948   | 3.312 | 930.2  |       |           |       |        |
| 23    | 978.561   | 3.261 | 23.2   |       |           |       |        |
| 24    | 973.432   | 3.244 | 34.0   |       |           |       |        |
| 25    | 967.791   | 3.225 | 23.6   |       |           |       |        |
| 26    | 810.330   | 2.700 | 22.2   |       |           |       |        |
| 27    | 802.637   | 2.675 | 31.9   |       |           |       |        |
| 28    | 795.712   | 2.652 | 19.5   |       |           |       |        |
| 29    | 749.808   | 2.499 | 45.6   |       |           |       |        |
| 30    | 748.013   | 2.493 | 95.2   |       |           |       |        |
| 31    | 746.218   | 2.487 | 133.3  |       |           |       |        |
| 32    | 744.422   | 2.481 | 95.4   |       |           |       |        |
| 33    | 742.627   | 2.475 | 43.1   |       |           |       |        |
| 34    | 598.246   | 1.994 | 18.4   |       |           |       |        |
| 35    | 592.860   | 1.976 | 24.2   |       |           |       |        |
| 36    | 587.731   | 1.959 | 17.3   |       |           |       |        |
| 37    | 519.259   | 1.730 | 3.6    |       |           |       |        |
| 38    | 511.822   | 1.706 | 16.3   |       |           |       |        |
| 39    | 504.385   | 1.681 | 30.8   |       |           |       |        |

# Compound 21

## <sup>13</sup>C NMR

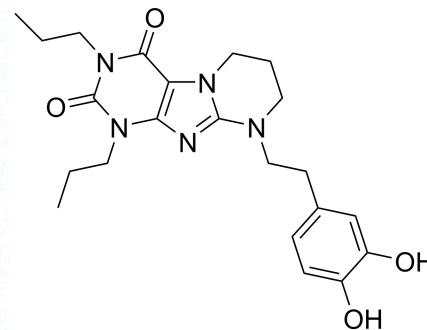

| No. | (ppm)  | (Hz)    | Height |
|-----|--------|---------|--------|
| 1   | 11.52  | 1159.5  | 0.1475 |
| 2   | 11.64  | 1171.3  | 0.1370 |
| 3   | 21.20  | 2133.7  | 0.0655 |
| 4   | 21.32  | 2145.5  | 0.1022 |
| 5   | 21.44  | 2158.0  | 0.1036 |
| 6   | 32.84  | 3304.6  | 0.0617 |
| 7   | 39.37  | 3961.9  | 0.1391 |
| 8   | 39.57  | 3982.4  | 0.4352 |
| 9   | 39.78  | 4003.7  | 0.8725 |
| 10  | 39.99  | 4024.2  | 1.0000 |
| 11  | 40.20  | 4045.5  | 0.8743 |
| 12  | 40.41  | 4066.8  | 0.4317 |
| 13  | 40.62  | 4087.3  | 0.1393 |
| 14  | 41.72  | 4198.8  | 0.0564 |
| 15  | 41.88  | 4215.0  | 0.0592 |
| 16  | 44.30  | 4458.5  | 0.0570 |
| 17  | 44.82  | 4510.6  | 0.0578 |
| 18  | 51.49  | 5181.1  | 0.0572 |
| 19  | 102.24 | 10289.1 | 0.0700 |
| 20  | 115.99 | 11672.0 | 0.0831 |
| 21  | 116.58 | 11732.1 | 0.0855 |
| 22  | 119.74 | 12049.8 | 0.0785 |
| 23  | 130.26 | 13108.3 | 0.0798 |
| 24  | 144.04 | 14494.8 | 0.0784 |
| 25  | 145.56 | 14648.1 | 0.1041 |
| 26  | 148.72 | 14965.8 | 0.0665 |
| 27  | 150.99 | 15194.7 | 0.0707 |
| 28  | 151.72 | 15268.0 | 0.0661 |
| 29  | 152.92 | 15389.1 | 0.0667 |

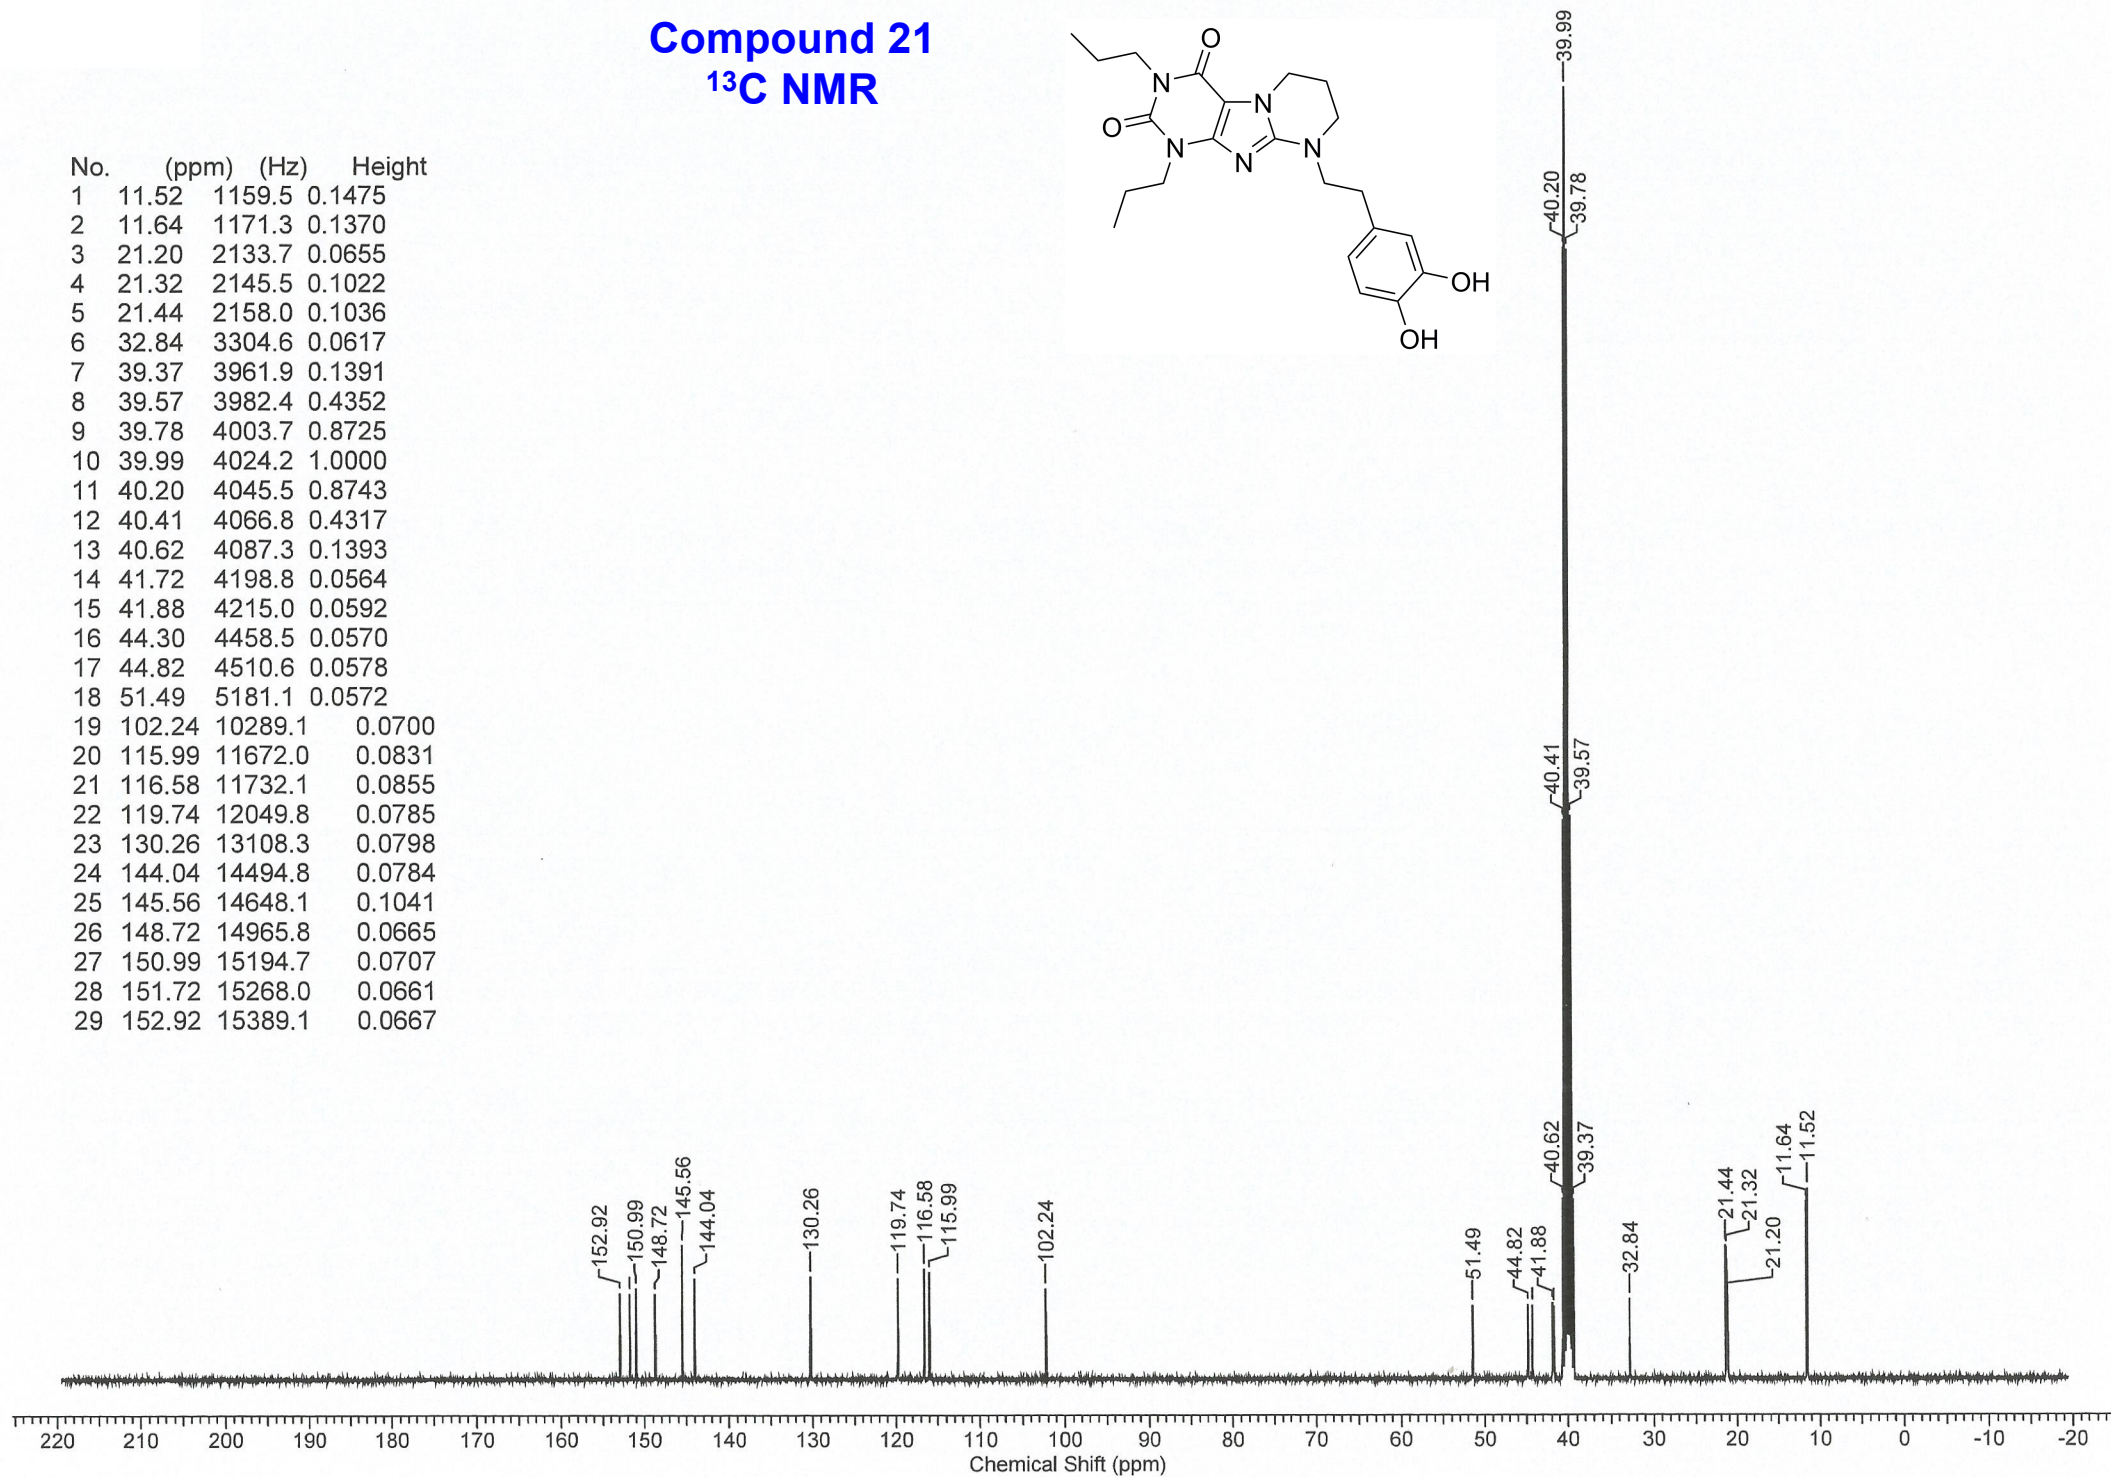

**Compound 22**  
**<sup>1</sup>H NMR**

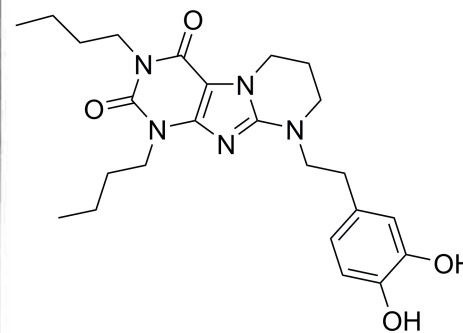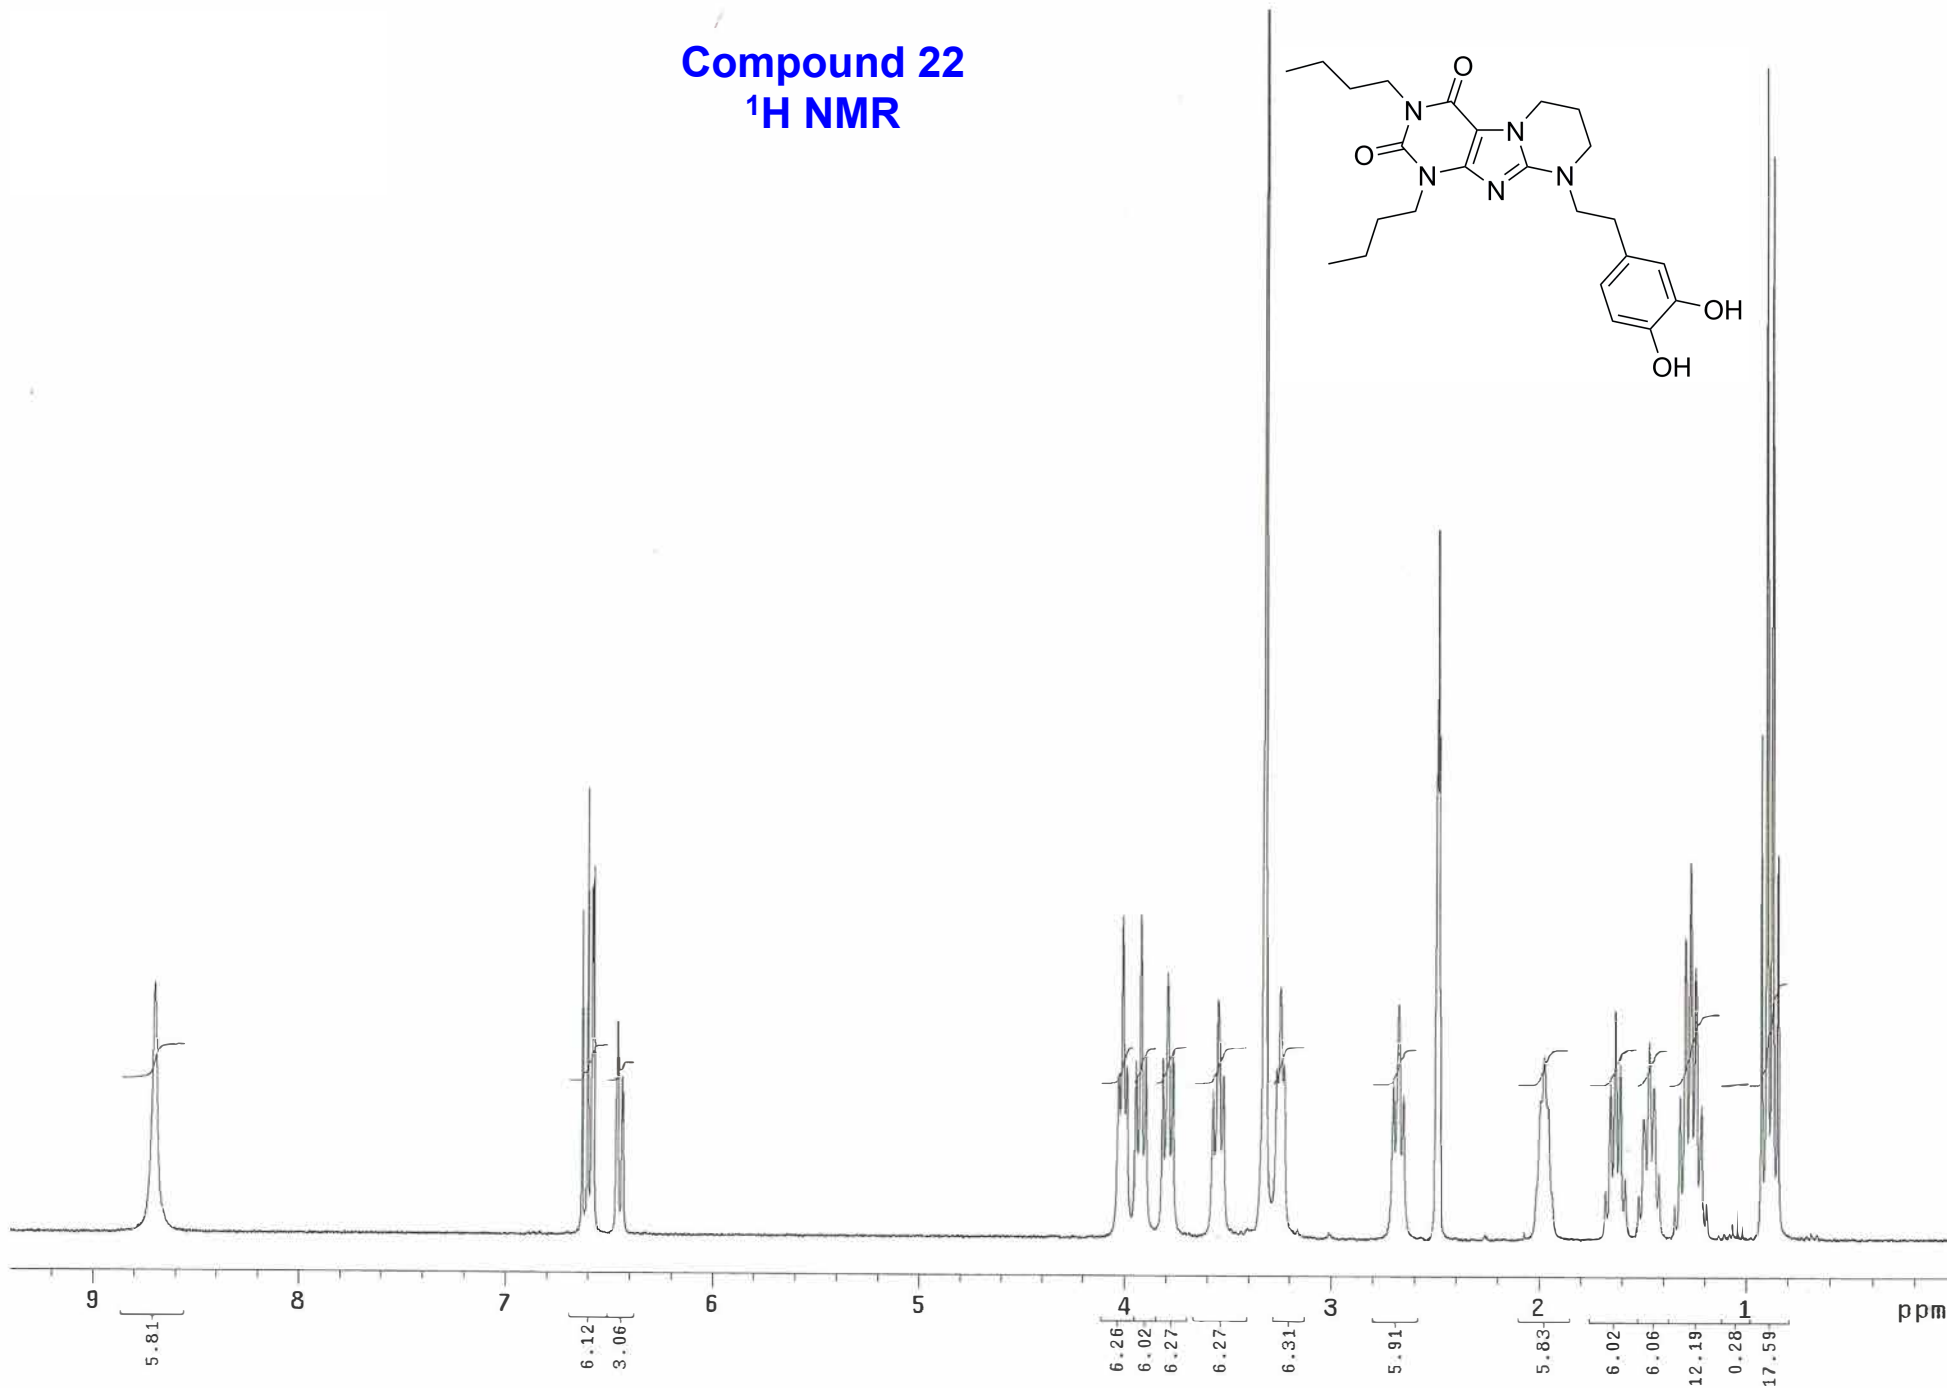

**Compound 22**  
 **$^1\text{H}$  NMR - zoom of the**  
**aliphatic region**

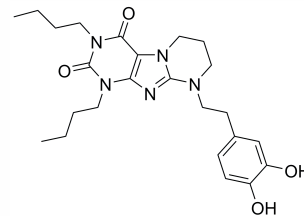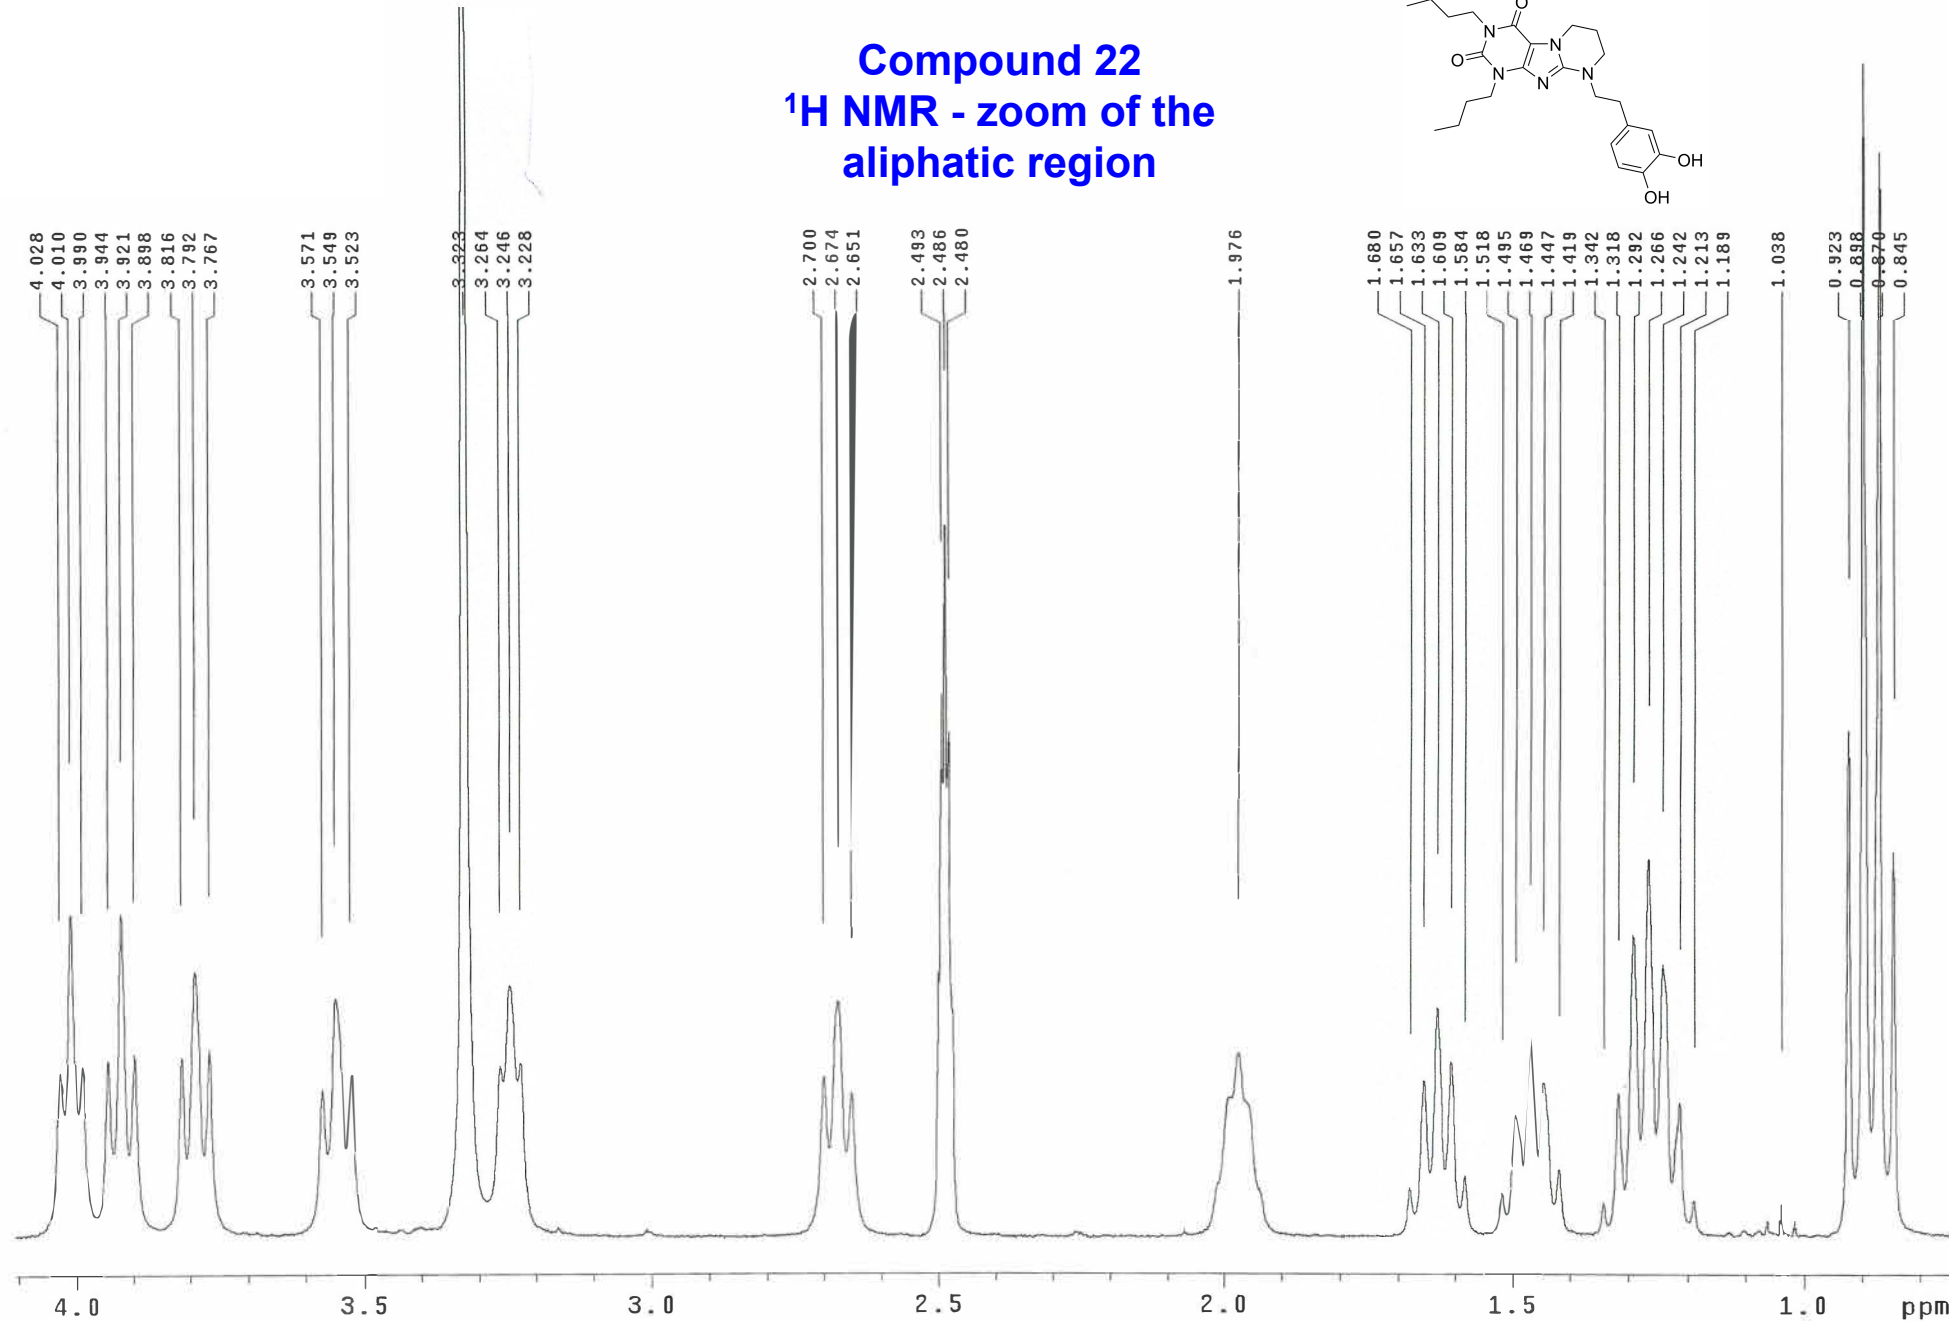

**Compound 22**  
 **$^1\text{H}$  NMR - zoom of the**  
**aromatic region**

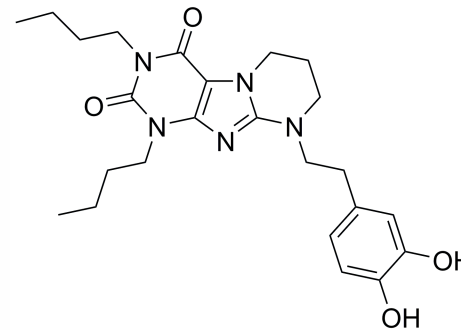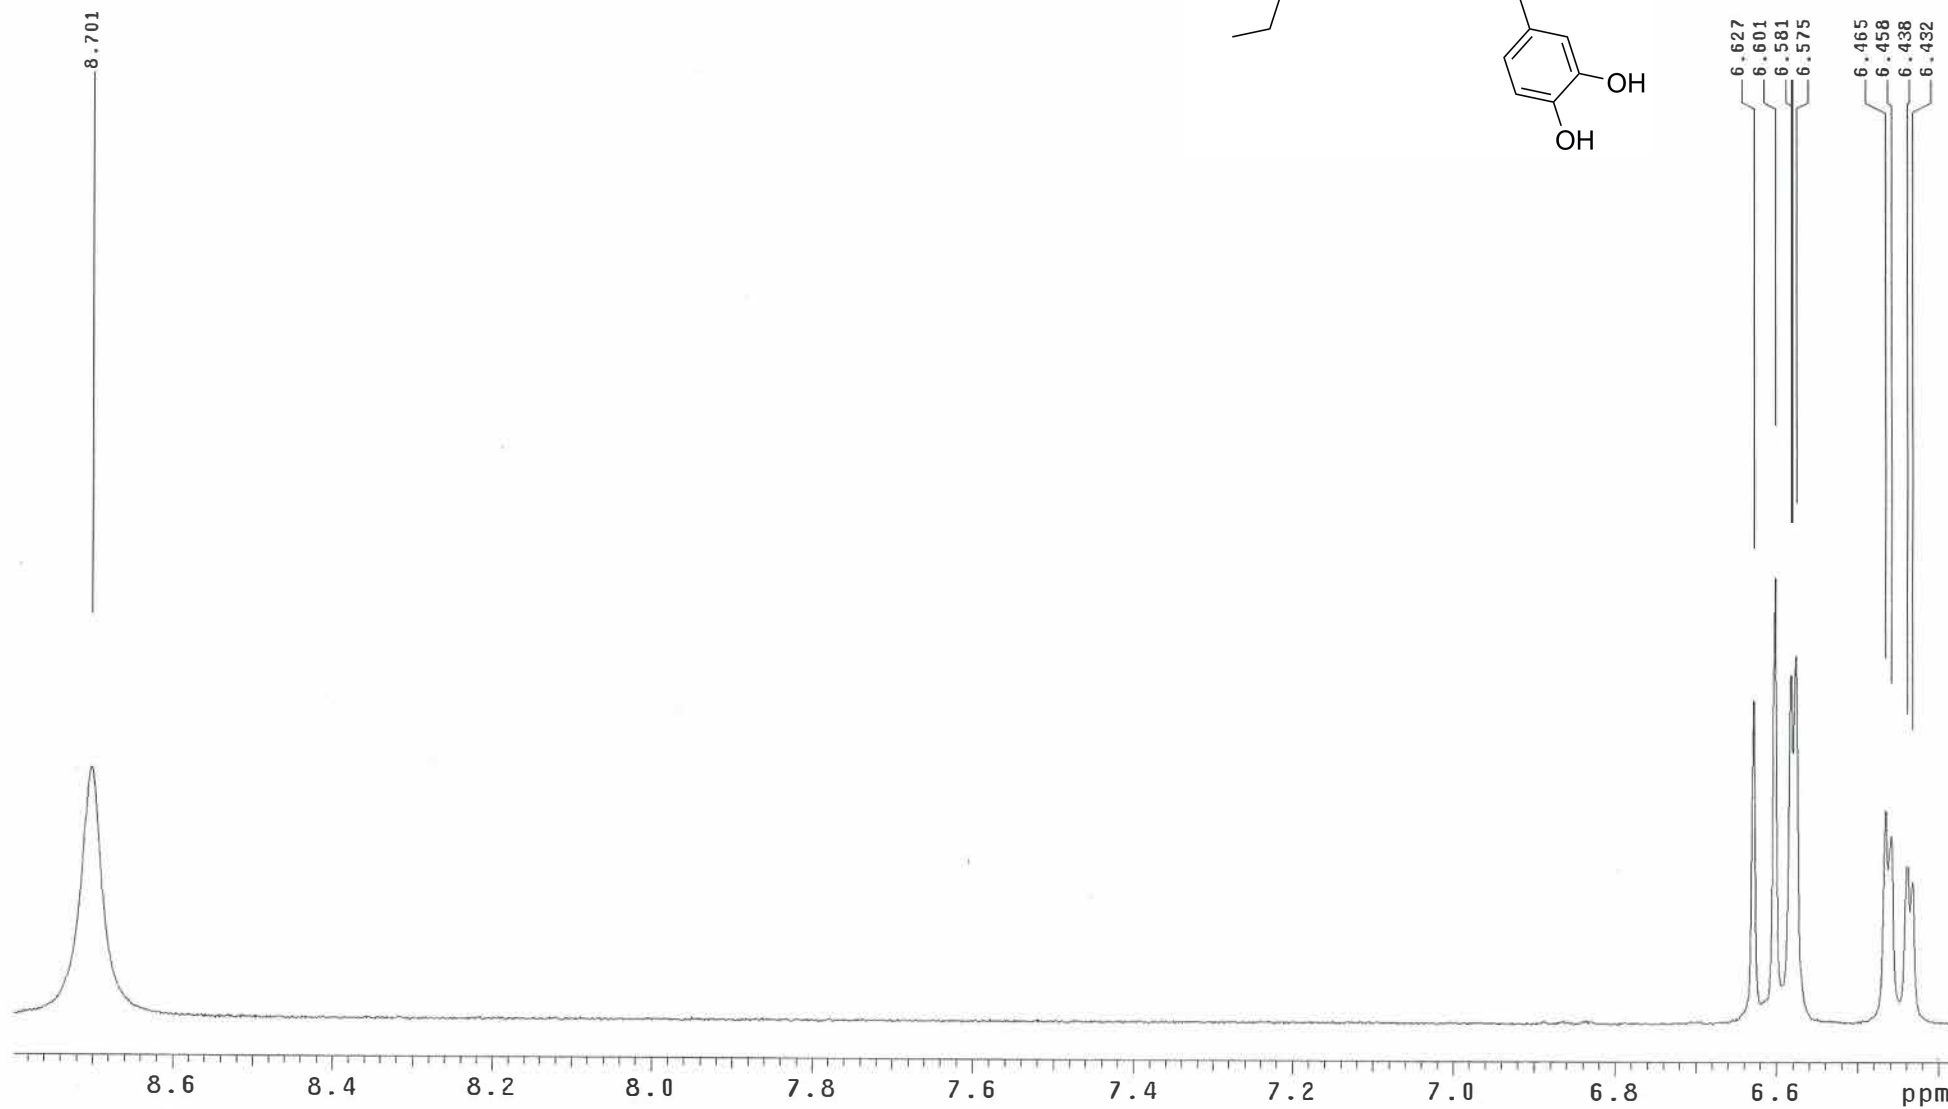

## Table of peaks

| INDEX | FREQUENCY | PPM   | HEIGHT | INDEX | FREQUENCY | PPM   | HEIGHT |
|-------|-----------|-------|--------|-------|-----------|-------|--------|
| 1     | 2611.124  | 8.701 | 32.5   | 40    | 448.479   | 1.495 | 15.6   |
| 2     | 1988.719  | 6.627 | 42.0   | 41    | 440.785   | 1.469 | 25.6   |
| 3     | 1980.769  | 6.601 | 58.0   | 42    | 434.118   | 1.447 | 19.7   |
| 4     | 1974.871  | 6.581 | 45.4   | 43    | 425.911   | 1.419 | 8.6    |
| 5     | 1973.075  | 6.575 | 47.8   | 44    | 402.831   | 1.342 | 4.4    |
| 6     | 1939.993  | 6.465 | 27.7   | 45    | 395.394   | 1.318 | 18.6   |
| 7     | 1937.942  | 6.458 | 24.4   | 46    | 387.700   | 1.292 | 39.1   |
| 8     | 1931.787  | 6.438 | 20.4   | 47    | 380.007   | 1.266 | 49.0   |
| 9     | 1929.992  | 6.432 | 18.3   | 48    | 372.826   | 1.242 | 35.3   |
| 10    | 1208.854  | 4.028 | 21.3   | 49    | 364.107   | 1.213 | 17.4   |
| 11    | 1203.212  | 4.010 | 41.7   | 50    | 356.926   | 1.189 | 4.7    |
| 12    | 1197.313  | 3.990 | 22.1   | 51    | 311.534   | 1.038 | 4.1    |
| 13    | 1183.465  | 3.944 | 22.8   | 52    | 276.914   | 0.923 | 65.7   |
| 14    | 1176.541  | 3.921 | 41.9   | 53    | 269.477   | 0.898 | 152.2  |
| 15    | 1169.617  | 3.898 | 23.6   | 54    | 261.014   | 0.870 | 140.5  |
| 16    | 1144.998  | 3.816 | 23.2   | 55    | 253.577   | 0.845 | 50.0   |
| 17    | 1137.817  | 3.792 | 34.4   |       |           |       |        |
| 18    | 1130.380  | 3.767 | 24.3   |       |           |       |        |
| 19    | 1071.653  | 3.571 | 19.1   |       |           |       |        |
| 20    | 1064.985  | 3.549 | 30.8   |       |           |       |        |
| 21    | 1057.035  | 3.523 | 21.0   |       |           |       |        |
| 22    | 997.282   | 3.323 | 379.4  |       |           |       |        |
| 23    | 979.331   | 3.264 | 22.1   |       |           |       |        |
| 24    | 973.945   | 3.246 | 32.6   |       |           |       |        |
| 25    | 968.560   | 3.228 | 22.5   |       |           |       |        |
| 26    | 810.074   | 2.700 | 20.5   |       |           |       |        |
| 27    | 802.380   | 2.674 | 30.4   |       |           |       |        |
| 28    | 795.456   | 2.651 | 18.5   |       |           |       |        |
| 29    | 749.808   | 2.499 | 34.1   |       |           |       |        |
| 30    | 748.013   | 2.493 | 70.2   |       |           |       |        |
| 31    | 745.961   | 2.486 | 92.1   |       |           |       |        |
| 32    | 744.166   | 2.480 | 65.3   |       |           |       |        |
| 33    | 592.860   | 1.976 | 23.6   |       |           |       |        |
| 34    | 504.128   | 1.680 | 6.3    |       |           |       |        |
| 35    | 497.204   | 1.657 | 20.1   |       |           |       |        |
| 36    | 490.024   | 1.633 | 29.6   |       |           |       |        |
| 37    | 482.843   | 1.609 | 22.6   |       |           |       |        |
| 38    | 475.406   | 1.584 | 7.9    |       |           |       |        |
| 39    | 455.659   | 1.518 | 5.5    |       |           |       |        |

# Compound 22 <sup>13</sup>C NMR

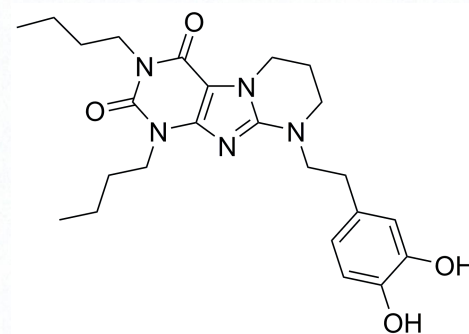

| No. | (ppm)  | (Hz)    | Height |
|-----|--------|---------|--------|
| 1   | 14.07  | 1416.3  | 0.1367 |
| 2   | 14.20  | 1428.8  | 0.1231 |
| 3   | 19.78  | 1990.7  | 0.1170 |
| 4   | 20.12  | 2024.4  | 0.1220 |
| 5   | 21.21  | 2134.5  | 0.0484 |
| 6   | 30.05  | 3023.6  | 0.0838 |
| 7   | 30.33  | 3052.2  | 0.0765 |
| 8   | 32.84  | 3304.6  | 0.0473 |
| 9   | 39.35  | 3960.4  | 0.1378 |
| 10  | 39.57  | 3981.7  | 0.4290 |
| 11  | 39.78  | 4002.9  | 0.8398 |
| 12  | 39.98  | 4023.5  | 1.0000 |
| 13  | 40.19  | 4044.8  | 0.8527 |
| 14  | 40.40  | 4065.3  | 0.4140 |
| 15  | 40.61  | 4086.6  | 0.1369 |
| 16  | 41.72  | 4198.1  | 0.0471 |
| 17  | 42.42  | 4268.5  | 0.0449 |
| 18  | 44.81  | 4509.1  | 0.0460 |
| 19  | 51.51  | 5183.3  | 0.0482 |
| 20  | 102.26 | 10290.6 | 0.0491 |
| 21  | 115.97 | 11670.5 | 0.0655 |
| 22  | 116.59 | 11732.8 | 0.0658 |
| 23  | 119.71 | 12046.8 | 0.0698 |
| 24  | 130.25 | 13107.6 | 0.0566 |
| 25  | 144.03 | 14494.1 | 0.0742 |
| 26  | 145.56 | 14648.1 | 0.0814 |
| 27  | 148.68 | 14962.1 | 0.0444 |
| 28  | 150.90 | 15185.9 | 0.0495 |
| 29  | 151.69 | 15265.1 | 0.0612 |
| 30  | 152.89 | 15386.1 | 0.0536 |

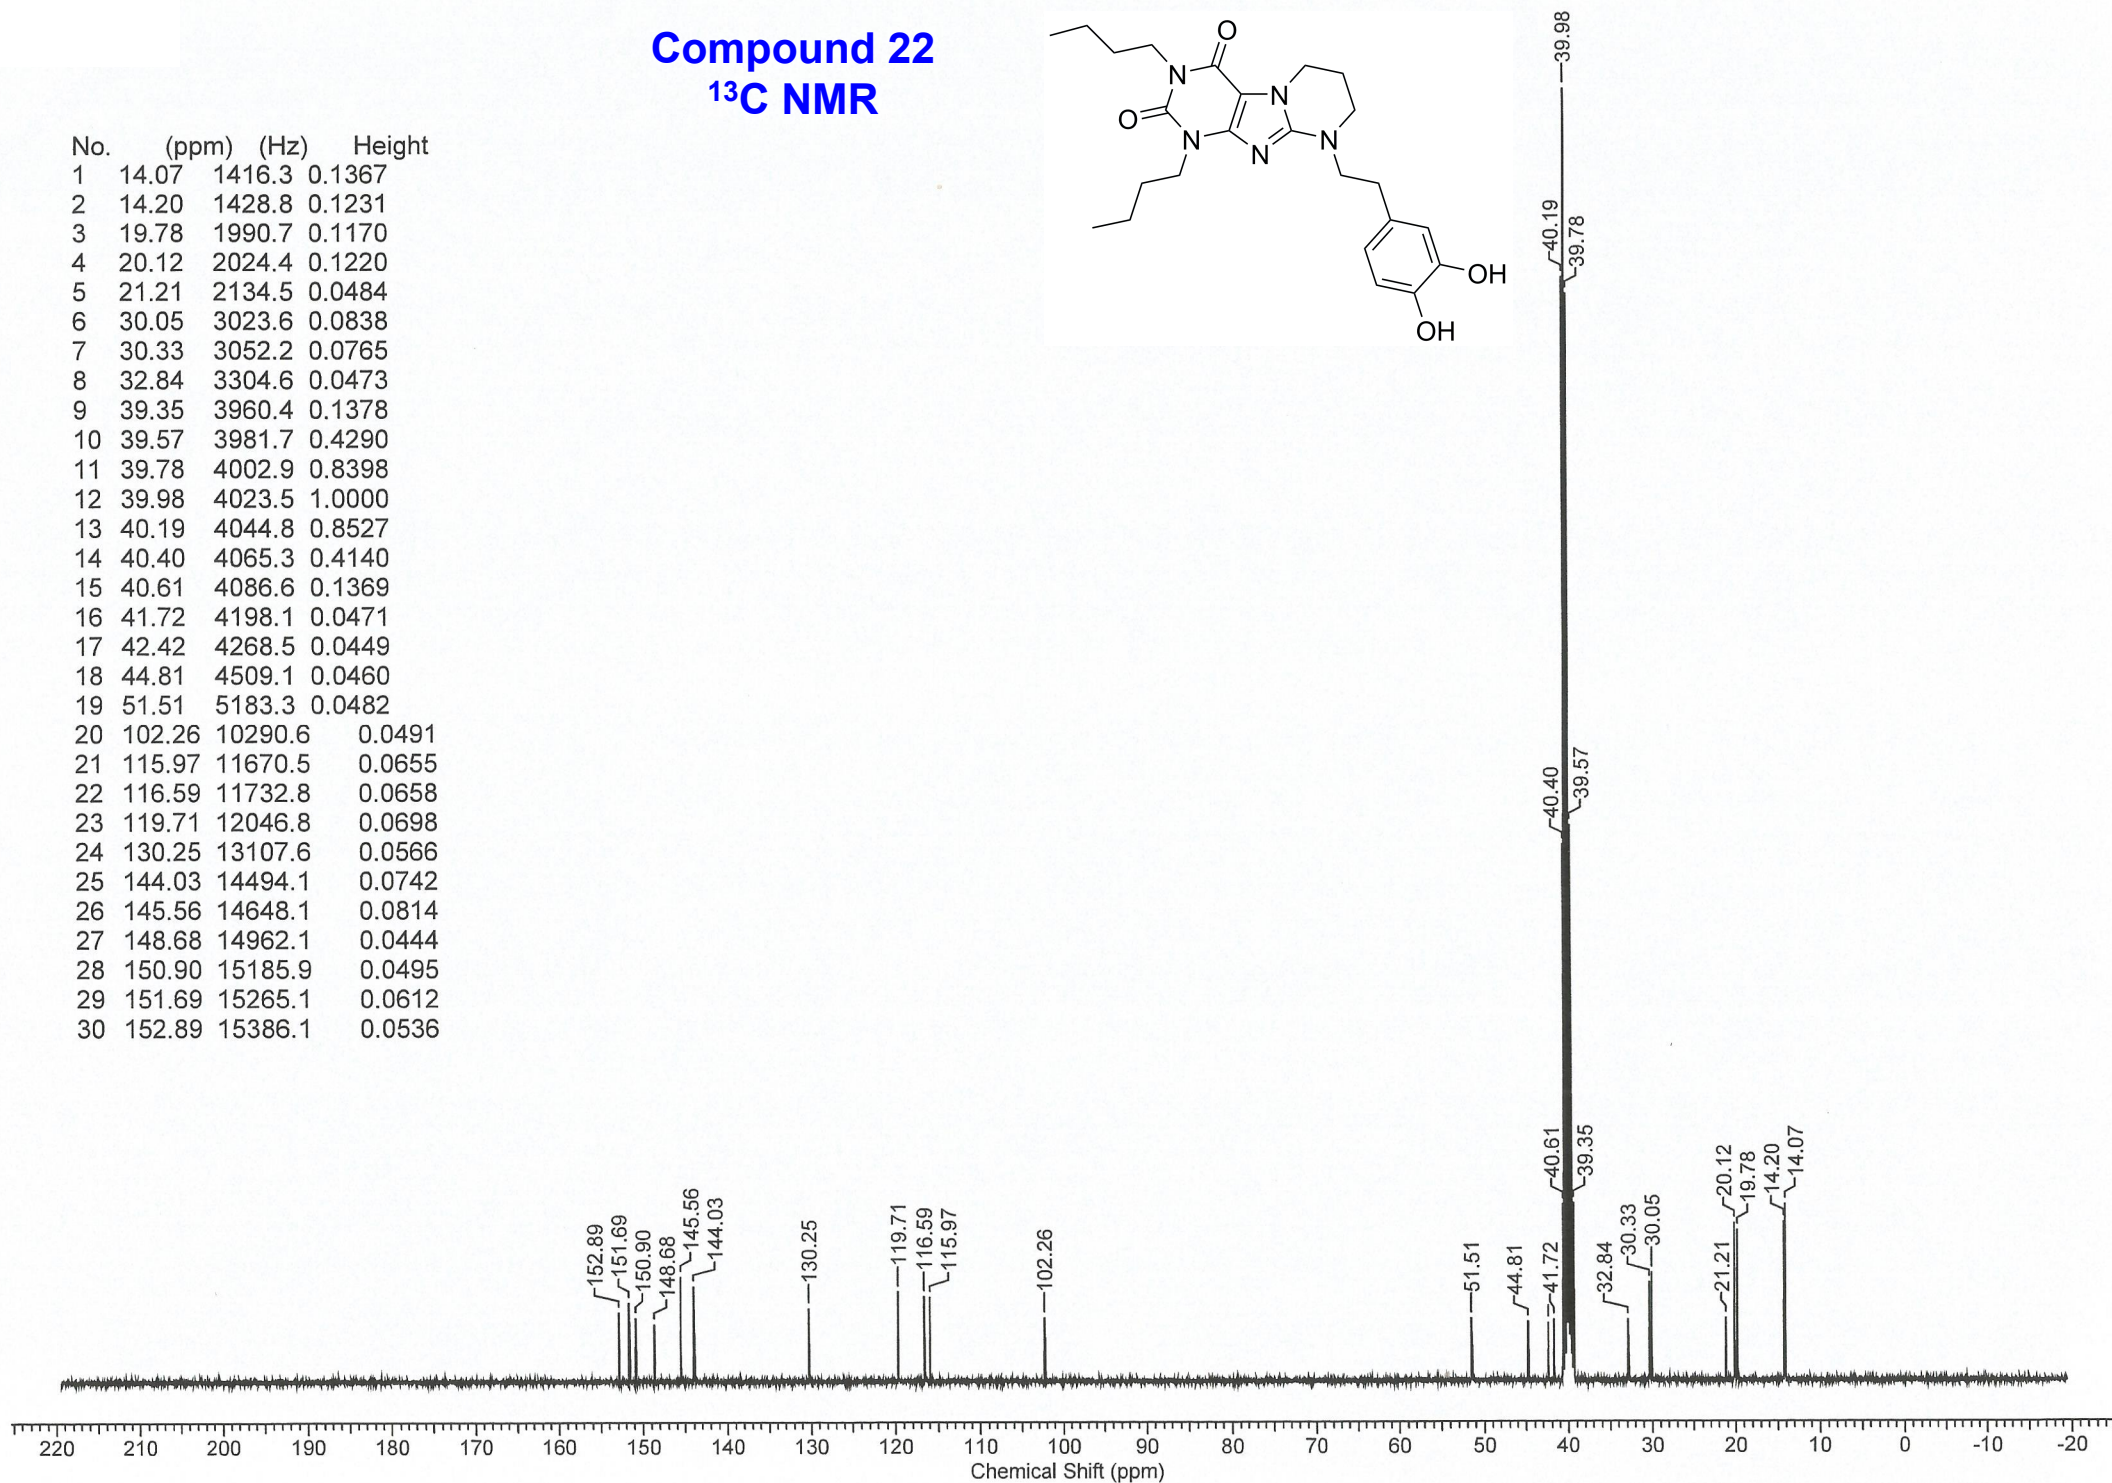

**Compound 8a**  
**<sup>1</sup>H NMR**

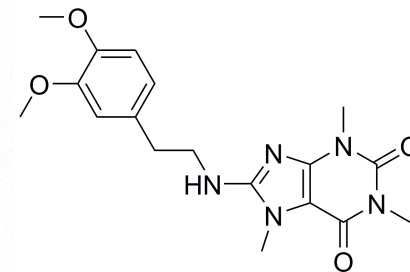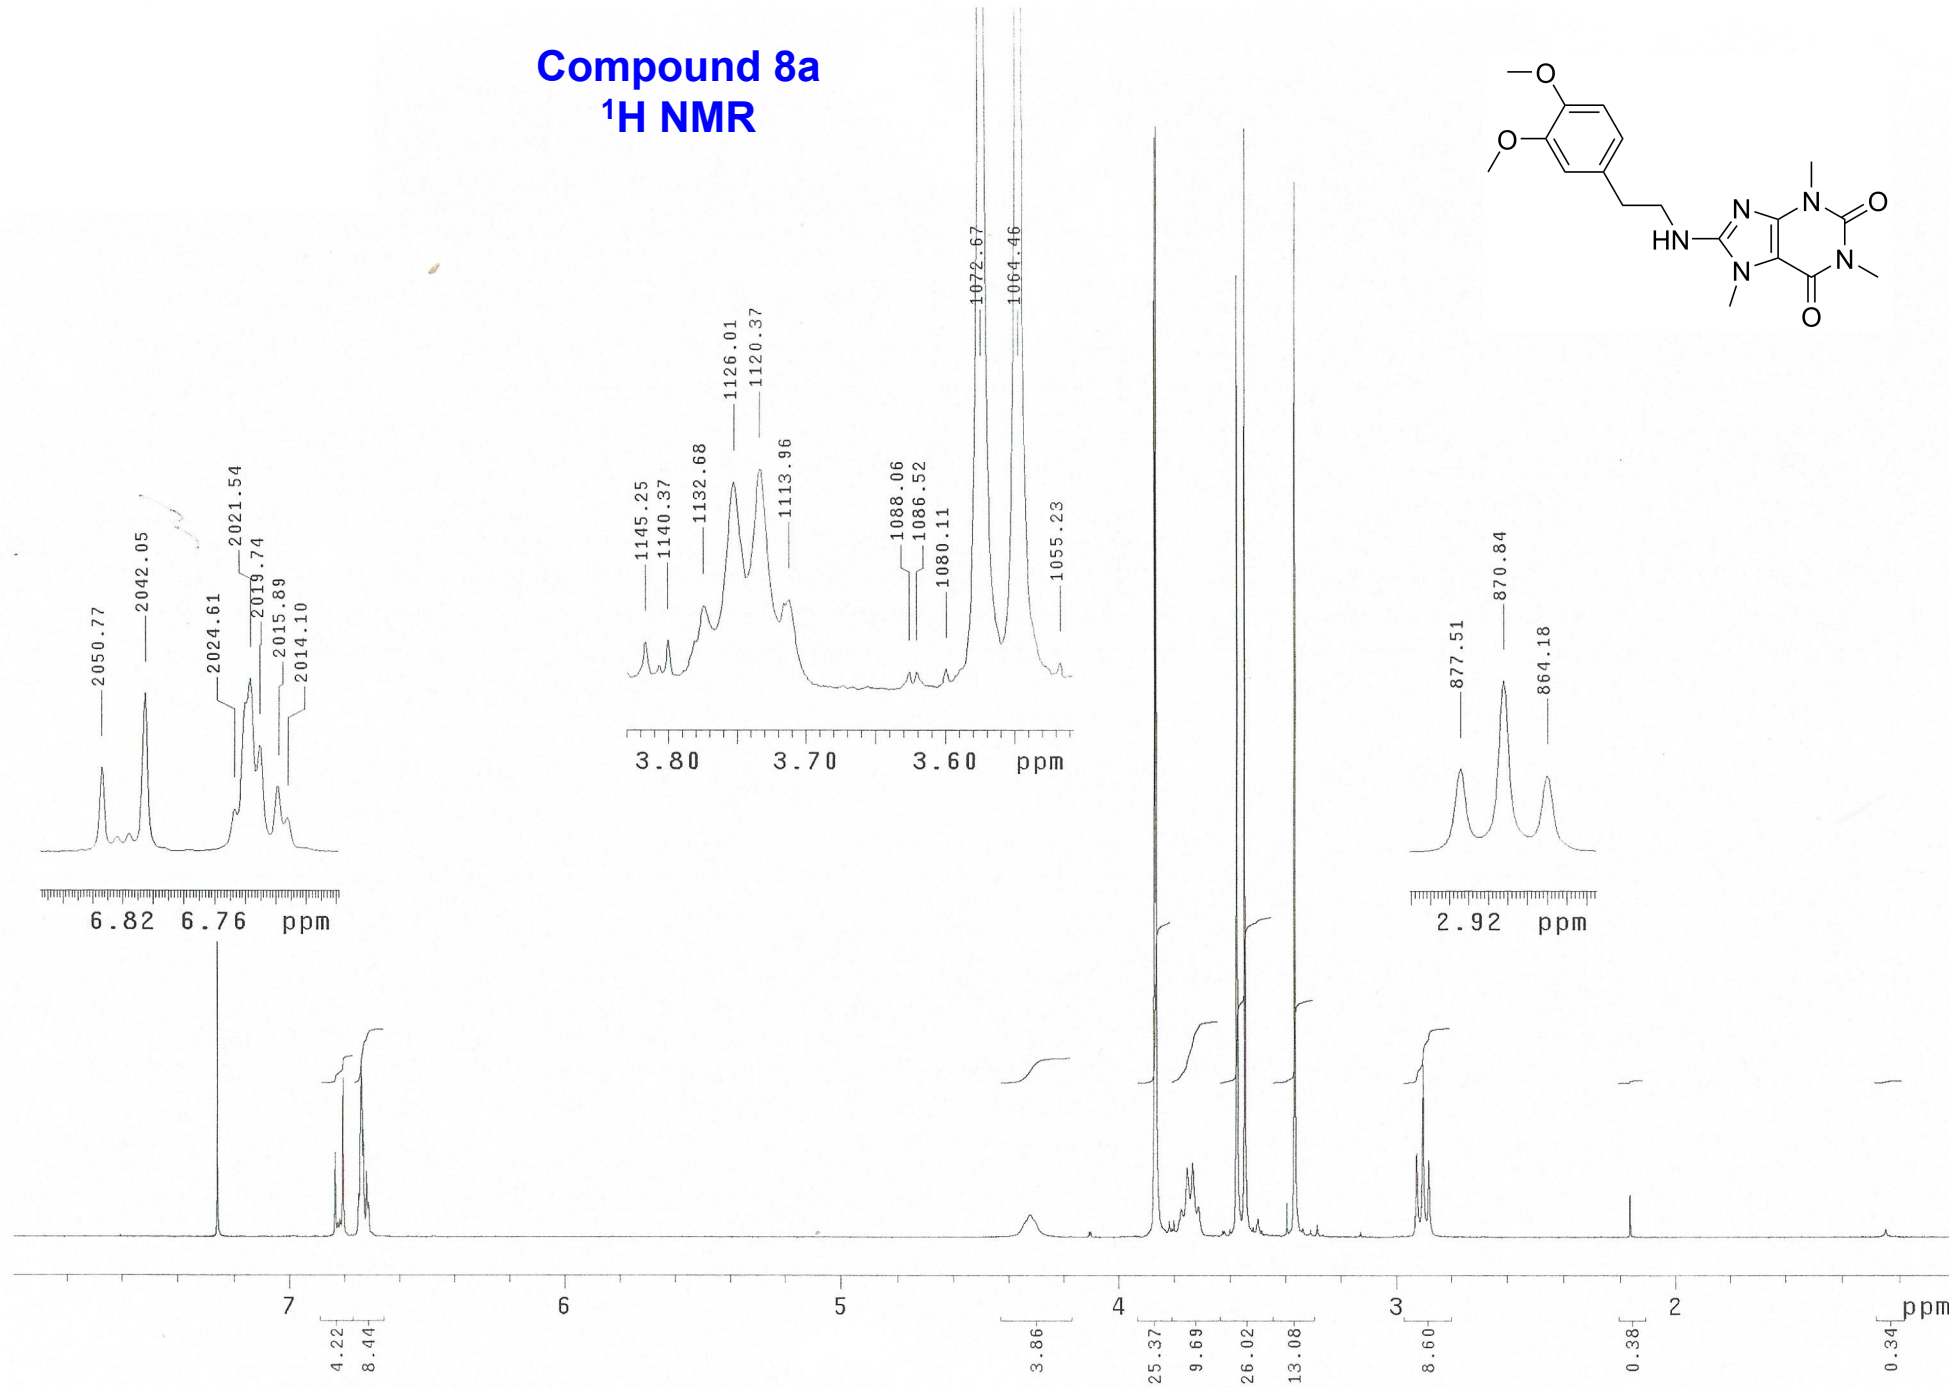

## Table of peaks

| INDEX | FREQUENCY | PPM   | HEIGHT |
|-------|-----------|-------|--------|
| 1     | 2178.227  | 7.259 | 38.3   |
| 2     | 2050.771  | 6.834 | 11.0   |
| 3     | 2042.052  | 6.805 | 20.7   |
| 4     | 2024.614  | 6.747 | 5.6    |
| 5     | 2022.562  | 6.740 | 19.5   |
| 6     | 2021.536  | 6.737 | 22.6   |
| 7     | 2019.741  | 6.731 | 13.9   |
| 8     | 2015.894  | 6.718 | 8.5    |
| 9     | 2014.099  | 6.712 | 4.5    |
| 10    | 1296.808  | 4.322 | 2.9    |
| 11    | 1160.889  | 3.869 | 142.6  |
| 12    | 1159.350  | 3.863 | 144.0  |
| 13    | 1132.680  | 3.775 | 3.7    |
| 14    | 1126.012  | 3.752 | 9.1    |
| 15    | 1120.370  | 3.734 | 9.6    |
| 16    | 1113.959  | 3.712 | 4.0    |
| 17    | 1072.670  | 3.575 | 124.7  |
| 18    | 1064.464  | 3.547 | 143.8  |
| 19    | 1018.559  | 3.394 | 4.4    |
| 20    | 1010.096  | 3.366 | 136.9  |
| 21    | 877.512   | 2.924 | 10.9   |
| 22    | 870.844   | 2.902 | 22.3   |
| 23    | 864.176   | 2.880 | 10.0   |
| 24    | 649.014   | 2.163 | 5.5    |

# Compound 8a

## <sup>13</sup>C NMR

| No. | (ppm)  | (Hz)    | Height |
|-----|--------|---------|--------|
| 1   | 27.64  | 2781.5  | 0.3734 |
| 2   | 29.52  | 2970.8  | 0.2557 |
| 3   | 29.78  | 2996.5  | 0.3052 |
| 4   | 35.42  | 3564.3  | 0.3002 |
| 5   | 44.47  | 4474.6  | 0.2995 |
| 6   | 55.91  | 5626.4  | 0.4358 |
| 7   | 55.94  | 5629.3  | 0.4577 |
| 8   | 76.76  | 7724.5  | 0.9323 |
| 9   | 77.07  | 7756.0  | 1.0000 |
| 10  | 77.39  | 7788.3  | 0.9661 |
| 11  | 103.07 | 10372.0 | 0.1289 |
| 12  | 111.39 | 11209.8 | 0.3370 |
| 13  | 111.93 | 11263.3 | 0.3056 |
| 14  | 120.74 | 12150.3 | 0.3930 |
| 15  | 130.93 | 13175.8 | 0.1848 |
| 16  | 147.89 | 14882.2 | 0.1723 |
| 17  | 148.35 | 14929.1 | 0.0768 |
| 18  | 149.18 | 15012.7 | 0.1816 |
| 19  | 151.69 | 15265.1 | 0.1378 |
| 20  | 153.08 | 15404.5 | 0.1191 |
| 21  | 154.17 | 15514.5 | 0.1182 |

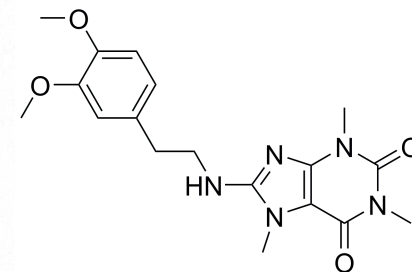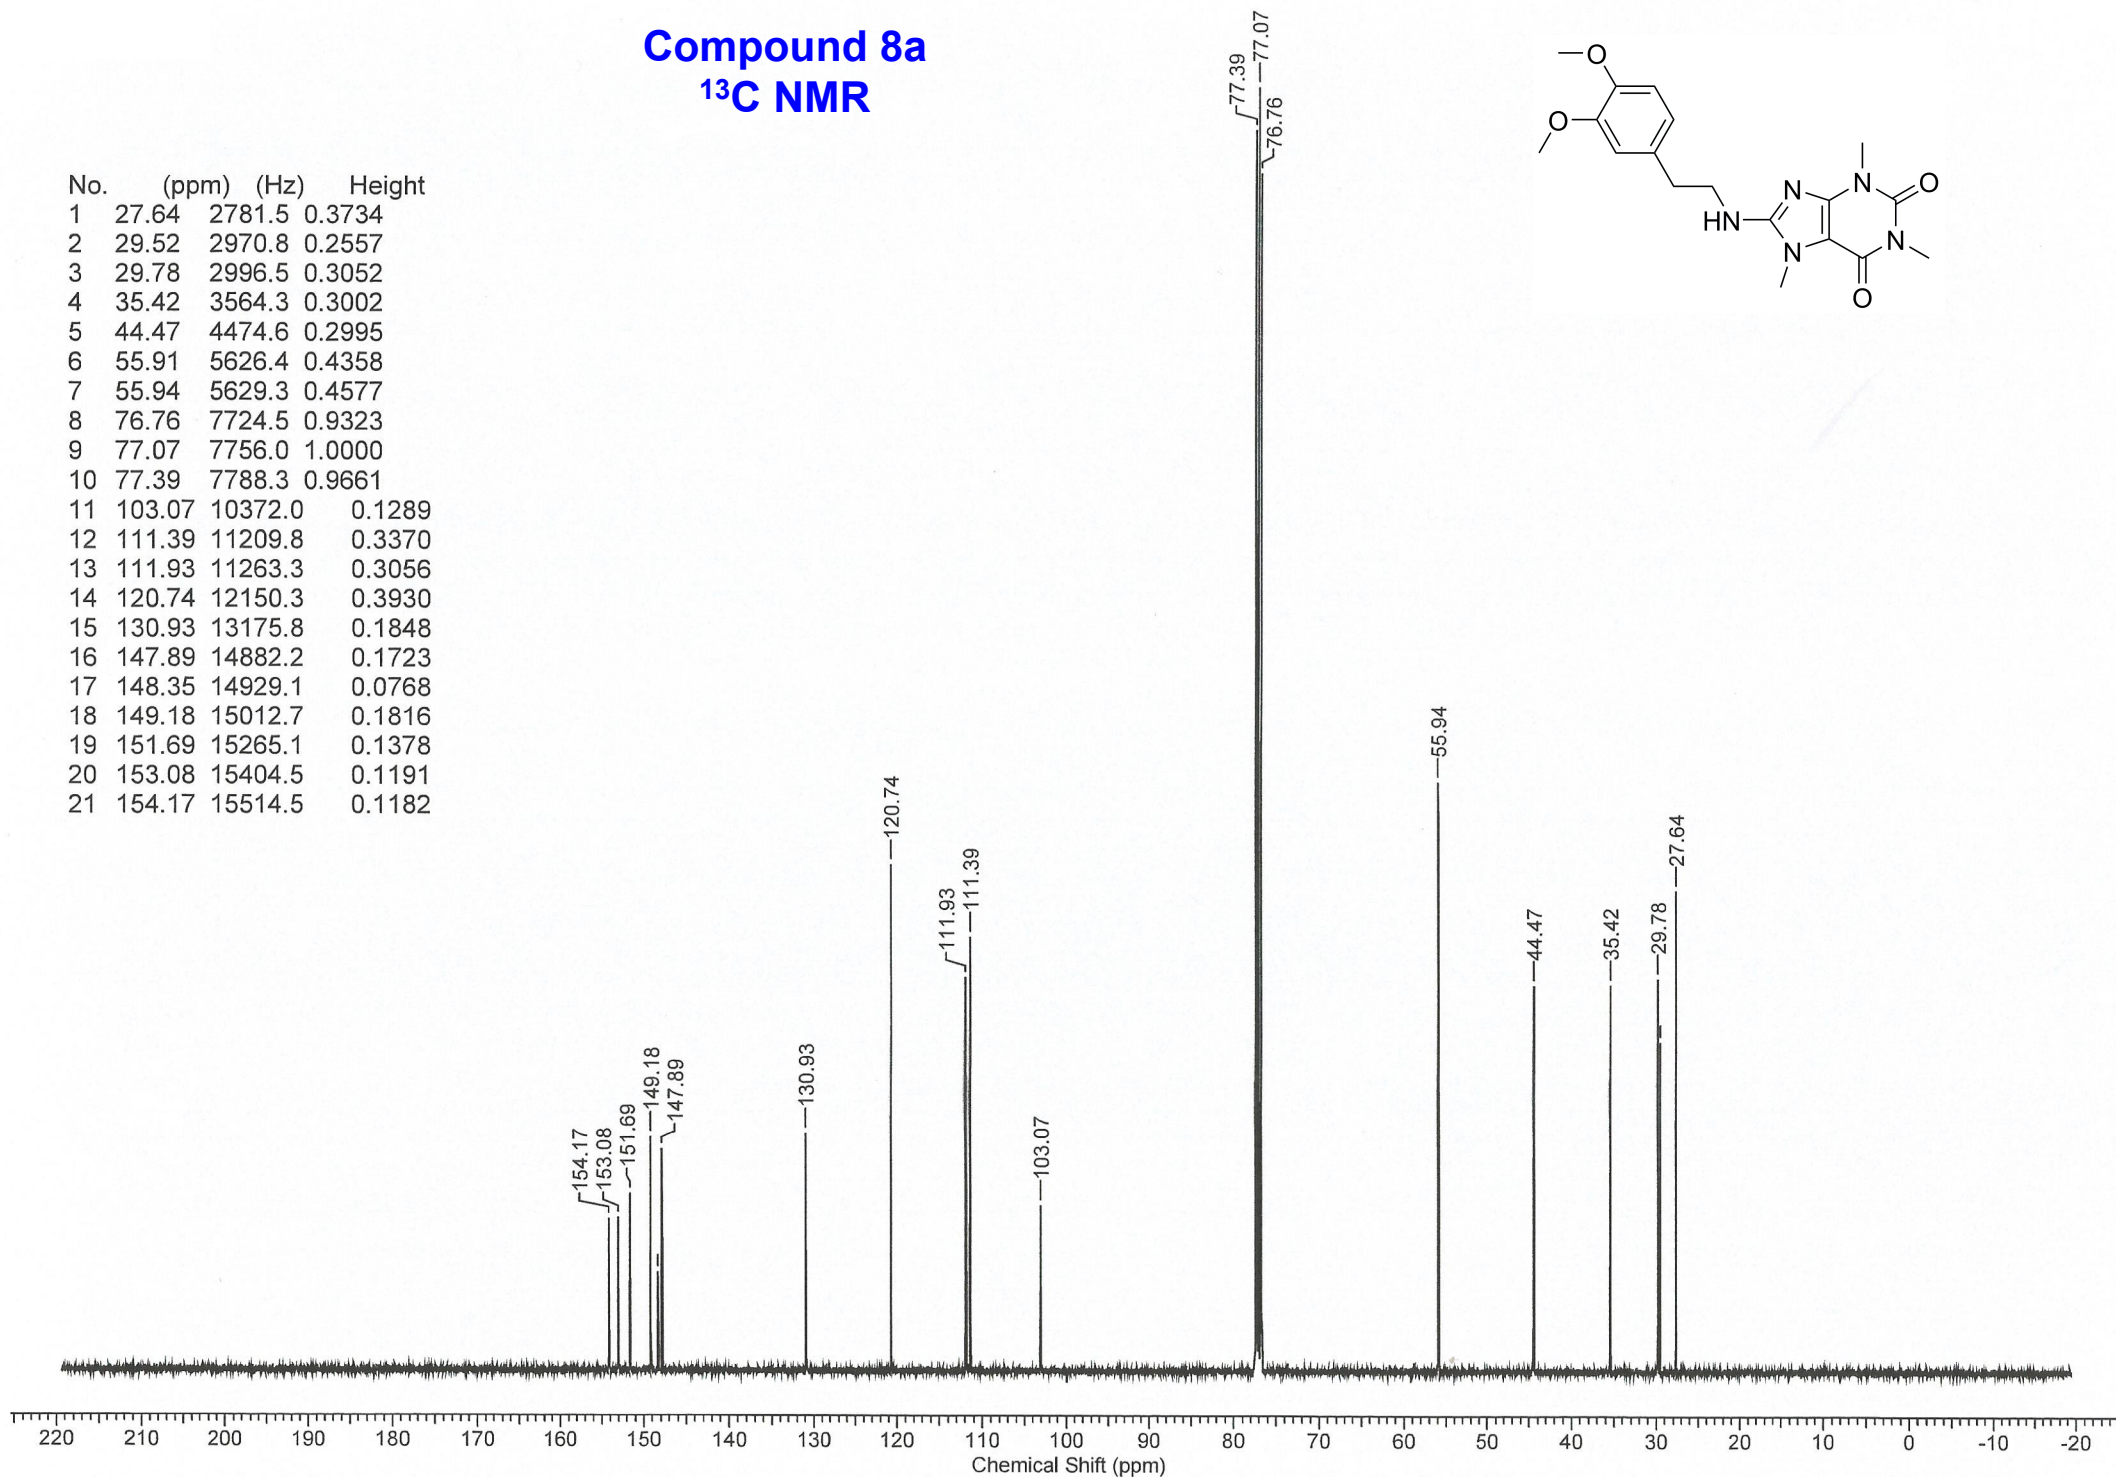

COc1ccc(OC)cc1CCNC2=NC3=C(NC)C(=O)N(C)C(=O)N3C2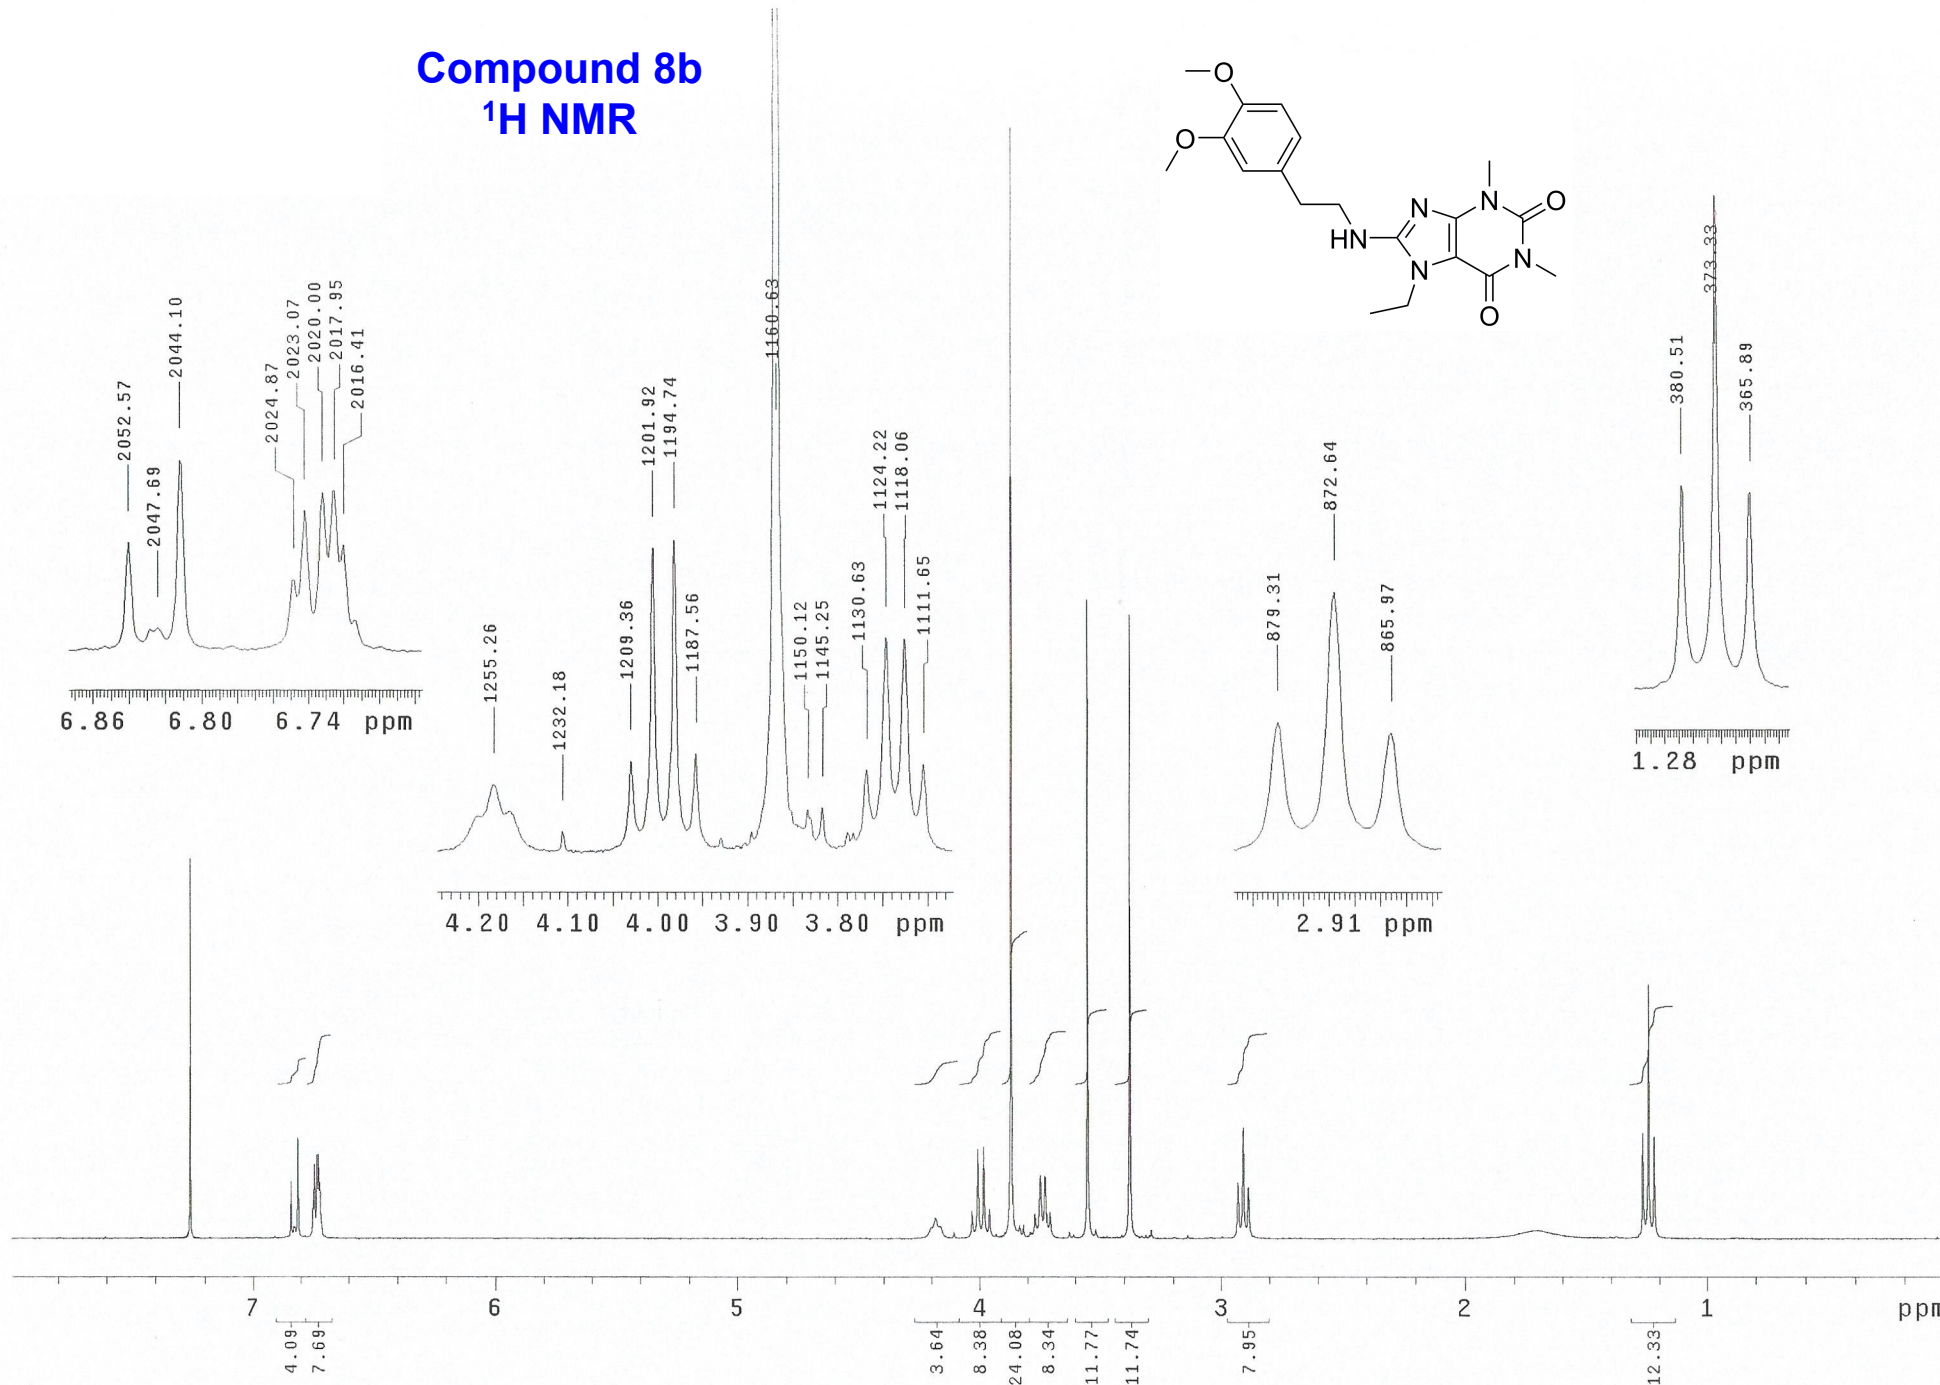

## Table of peaks

| INDEX | FREQUENCY | PPM   | HEIGHT |
|-------|-----------|-------|--------|
| 1     | 2178.227  | 7.259 | 49.3   |
| 2     | 2052.567  | 6.840 | 7.4    |
| 3     | 2044.104  | 6.812 | 13.1   |
| 4     | 2024.870  | 6.748 | 4.9    |
| 5     | 2023.075  | 6.742 | 9.6    |
| 6     | 2019.997  | 6.732 | 10.8   |
| 7     | 2017.946  | 6.725 | 11.0   |
| 8     | 2016.407  | 6.720 | 7.3    |
| 9     | 1255.263  | 4.183 | 2.6    |
| 10    | 1209.358  | 4.030 | 3.5    |
| 11    | 1201.921  | 4.005 | 11.6   |
| 12    | 1194.741  | 3.981 | 11.9   |
| 13    | 1187.560  | 3.957 | 3.8    |
| 14    | 1160.633  | 3.868 | 144.0  |
| 15    | 1130.628  | 3.768 | 3.2    |
| 16    | 1124.217  | 3.746 | 8.2    |
| 17    | 1118.062  | 3.726 | 8.2    |
| 18    | 1111.651  | 3.705 | 3.4    |
| 19    | 1064.977  | 3.549 | 83.0   |
| 20    | 1012.917  | 3.376 | 81.0   |
| 21    | 879.307   | 2.930 | 7.3    |
| 22    | 872.639   | 2.908 | 14.4   |
| 23    | 865.971   | 2.886 | 6.7    |
| 24    | 380.511   | 1.268 | 13.7   |
| 25    | 373.330   | 1.244 | 32.9   |
| 26    | 365.893   | 1.219 | 13.2   |

# Compound 8b

## <sup>13</sup>C NMR

| No. | (ppm)  | (Hz)    | Height |
|-----|--------|---------|--------|
| 1   | 14.68  | 1477.2  | 0.4127 |
| 2   | 27.65  | 2783.0  | 0.3992 |
| 3   | 29.75  | 2993.5  | 0.3359 |
| 4   | 35.37  | 3559.9  | 0.3447 |
| 5   | 38.16  | 3840.1  | 0.2556 |
| 6   | 44.44  | 4472.4  | 0.3151 |
| 7   | 55.89  | 5624.2  | 0.4608 |
| 8   | 55.95  | 5630.8  | 0.4700 |
| 9   | 76.75  | 7723.7  | 0.9464 |
| 10  | 77.07  | 7756.0  | 1.0000 |
| 11  | 77.39  | 7788.3  | 0.9381 |
| 12  | 102.43 | 10308.2 | 0.1377 |
| 13  | 111.40 | 11210.5 | 0.3414 |
| 14  | 111.94 | 11264.8 | 0.2951 |
| 15  | 120.77 | 12153.9 | 0.4298 |
| 16  | 131.02 | 13185.4 | 0.1988 |
| 17  | 147.89 | 14882.2 | 0.2007 |
| 18  | 148.59 | 14952.6 | 0.0929 |
| 19  | 149.19 | 15013.5 | 0.2200 |
| 20  | 151.76 | 15272.4 | 0.1585 |
| 21  | 152.22 | 15317.9 | 0.1510 |
| 22  | 153.90 | 15487.4 | 0.1493 |

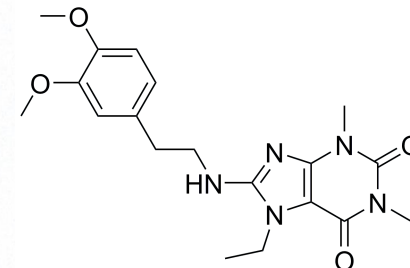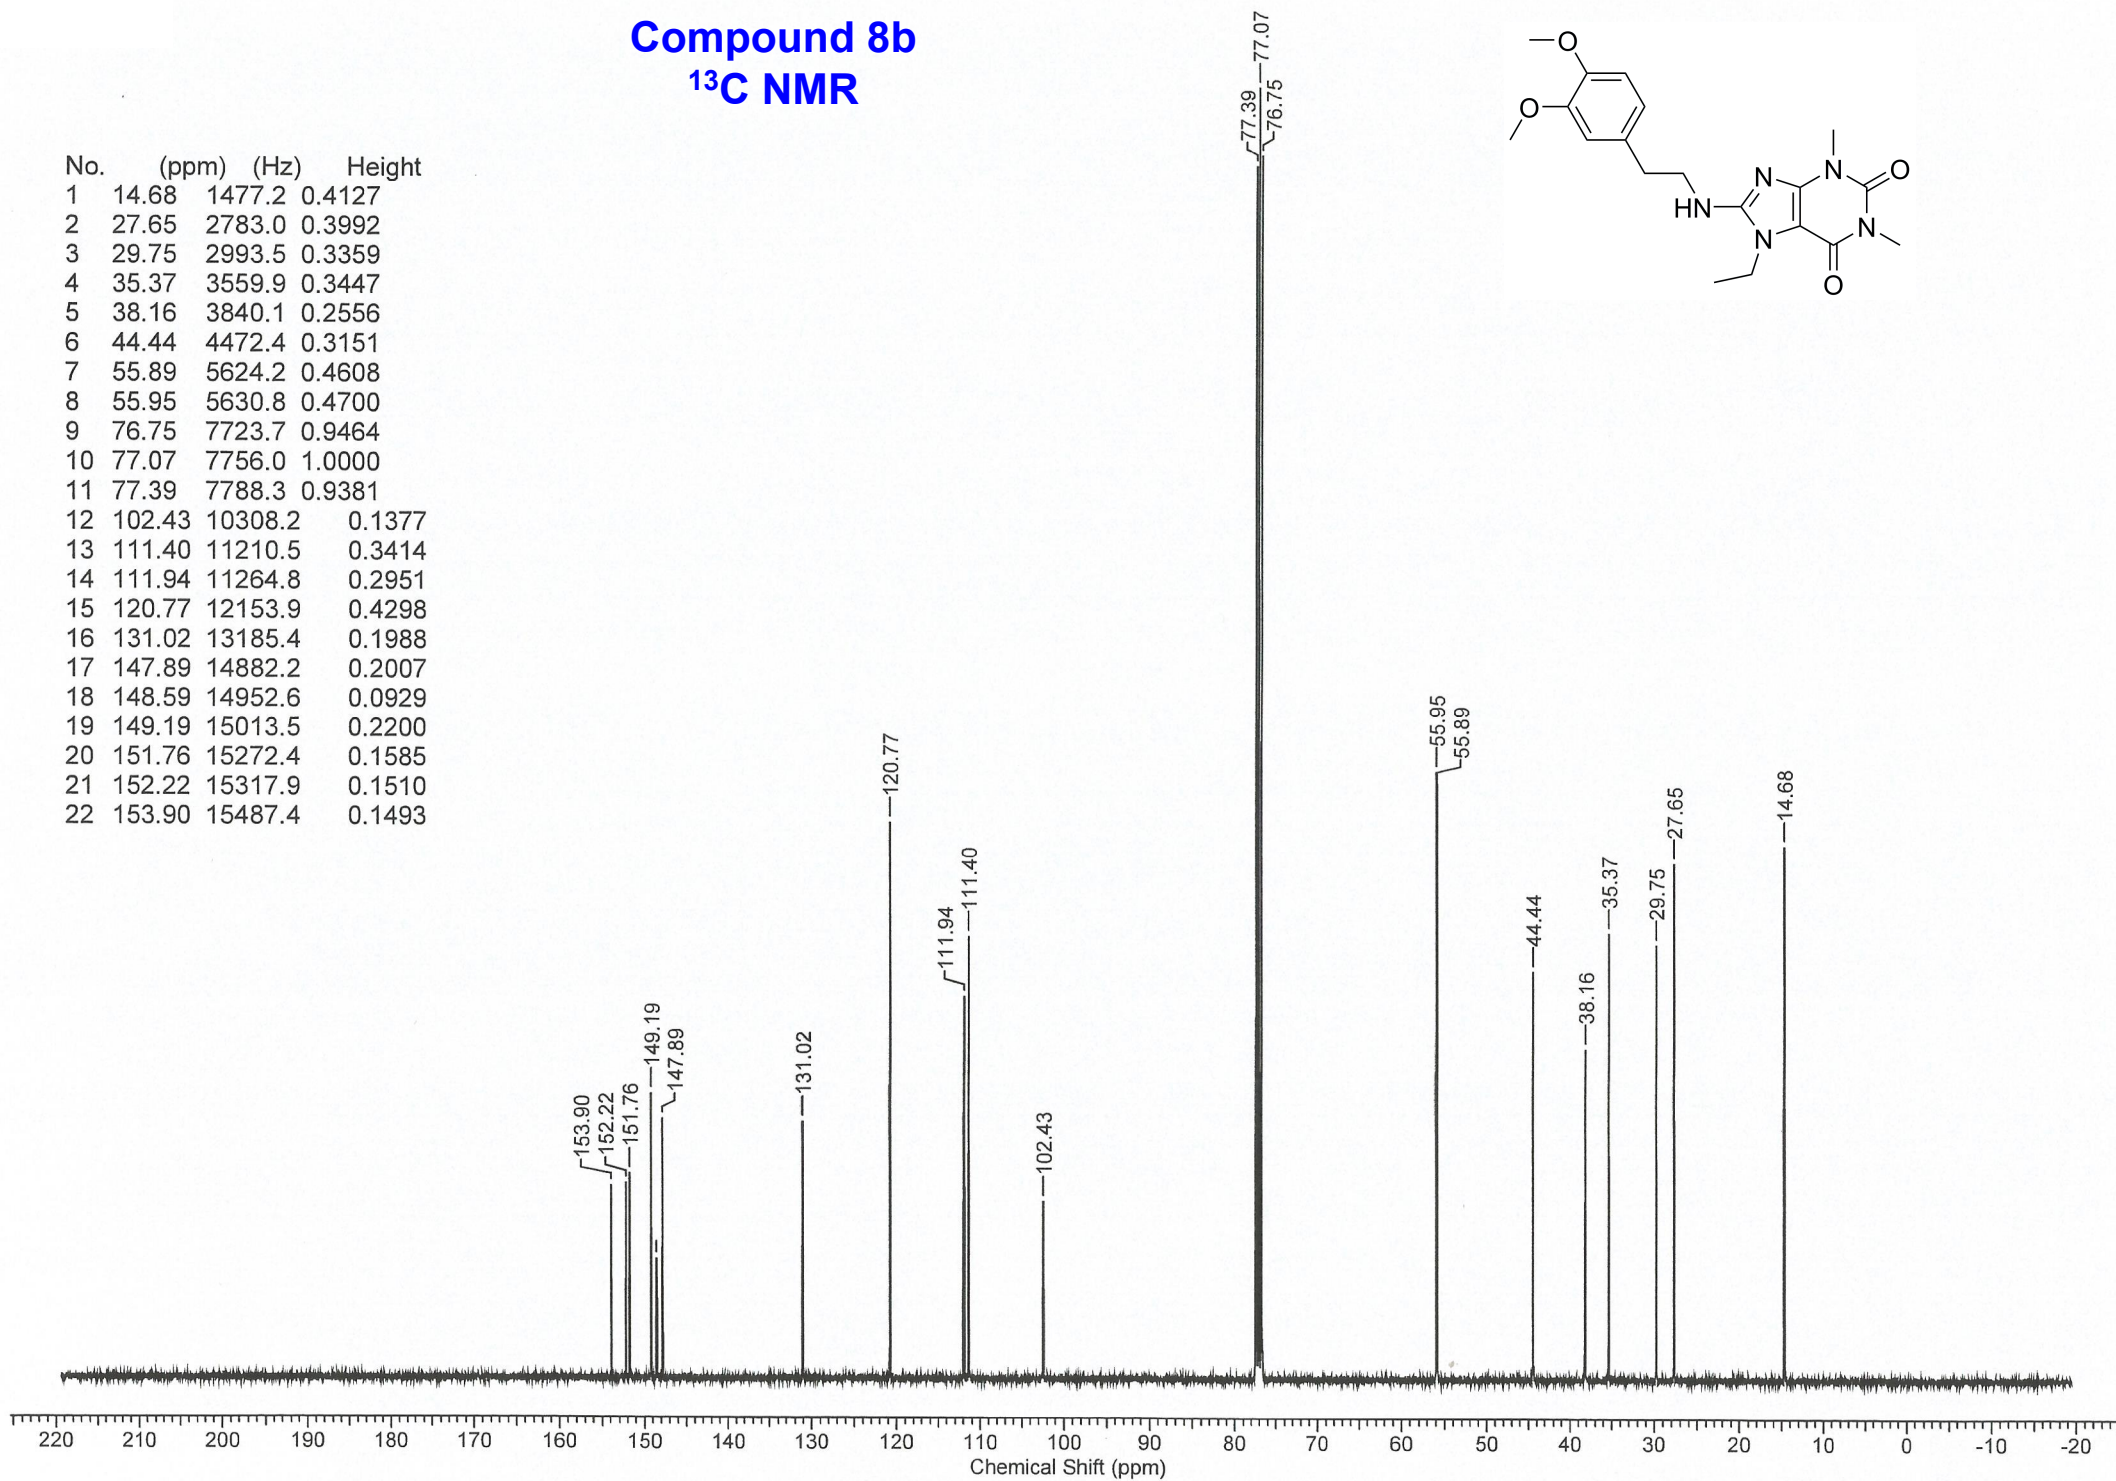

**Compound 8c**  
 **$^1\text{H}$  NMR - zoom of the**  
**aromatic region**

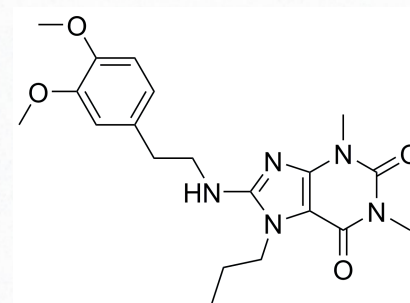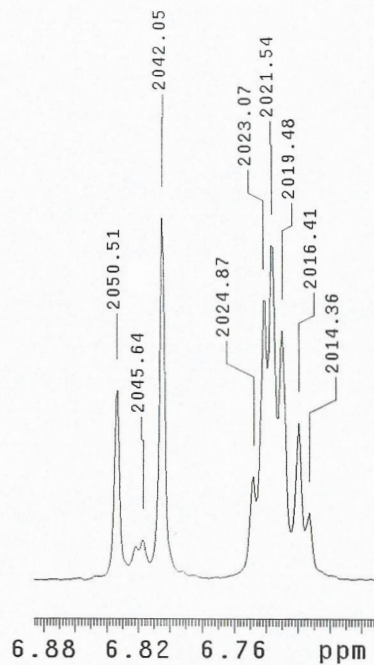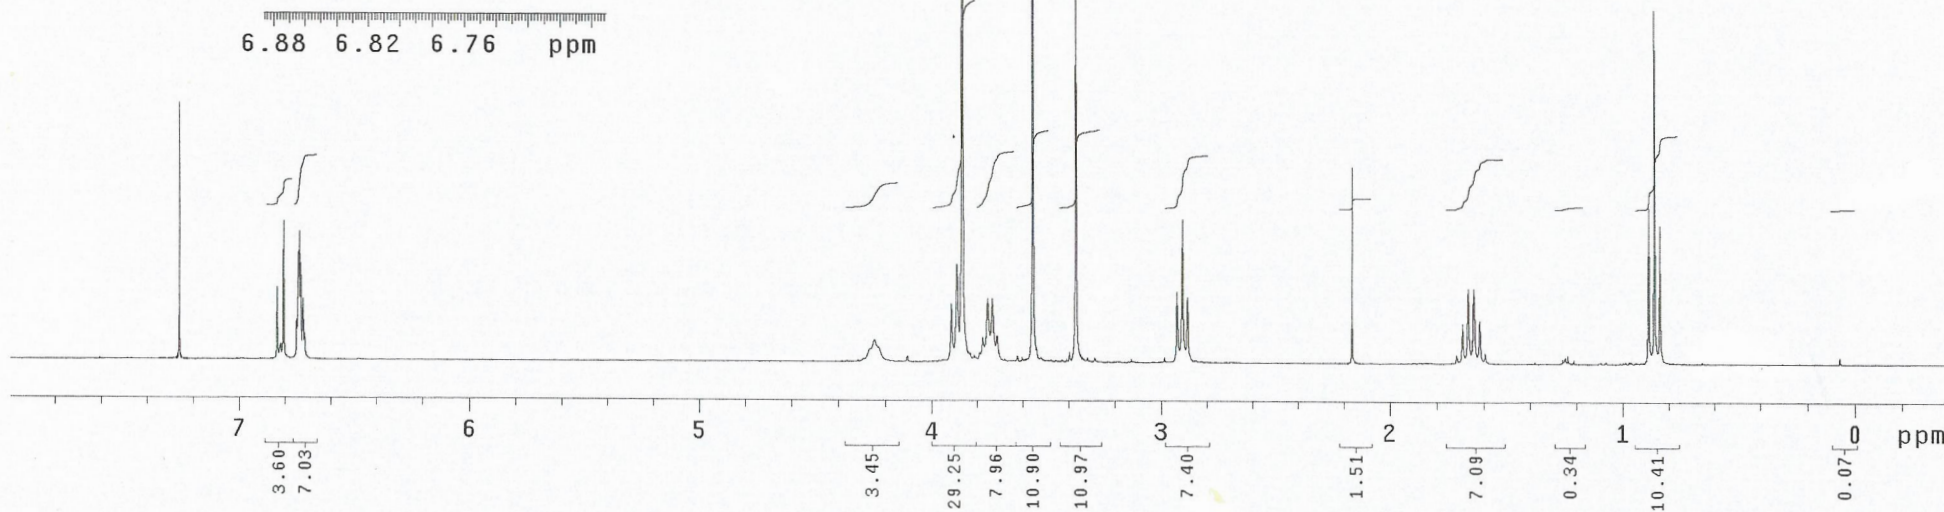

**Compound 8c**  
 **$^1\text{H}$  NMR - zoom of the**  
**aliphatic region**

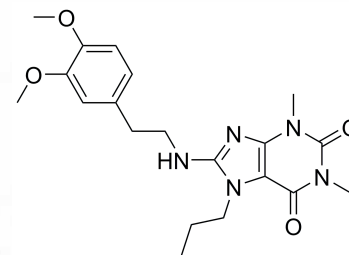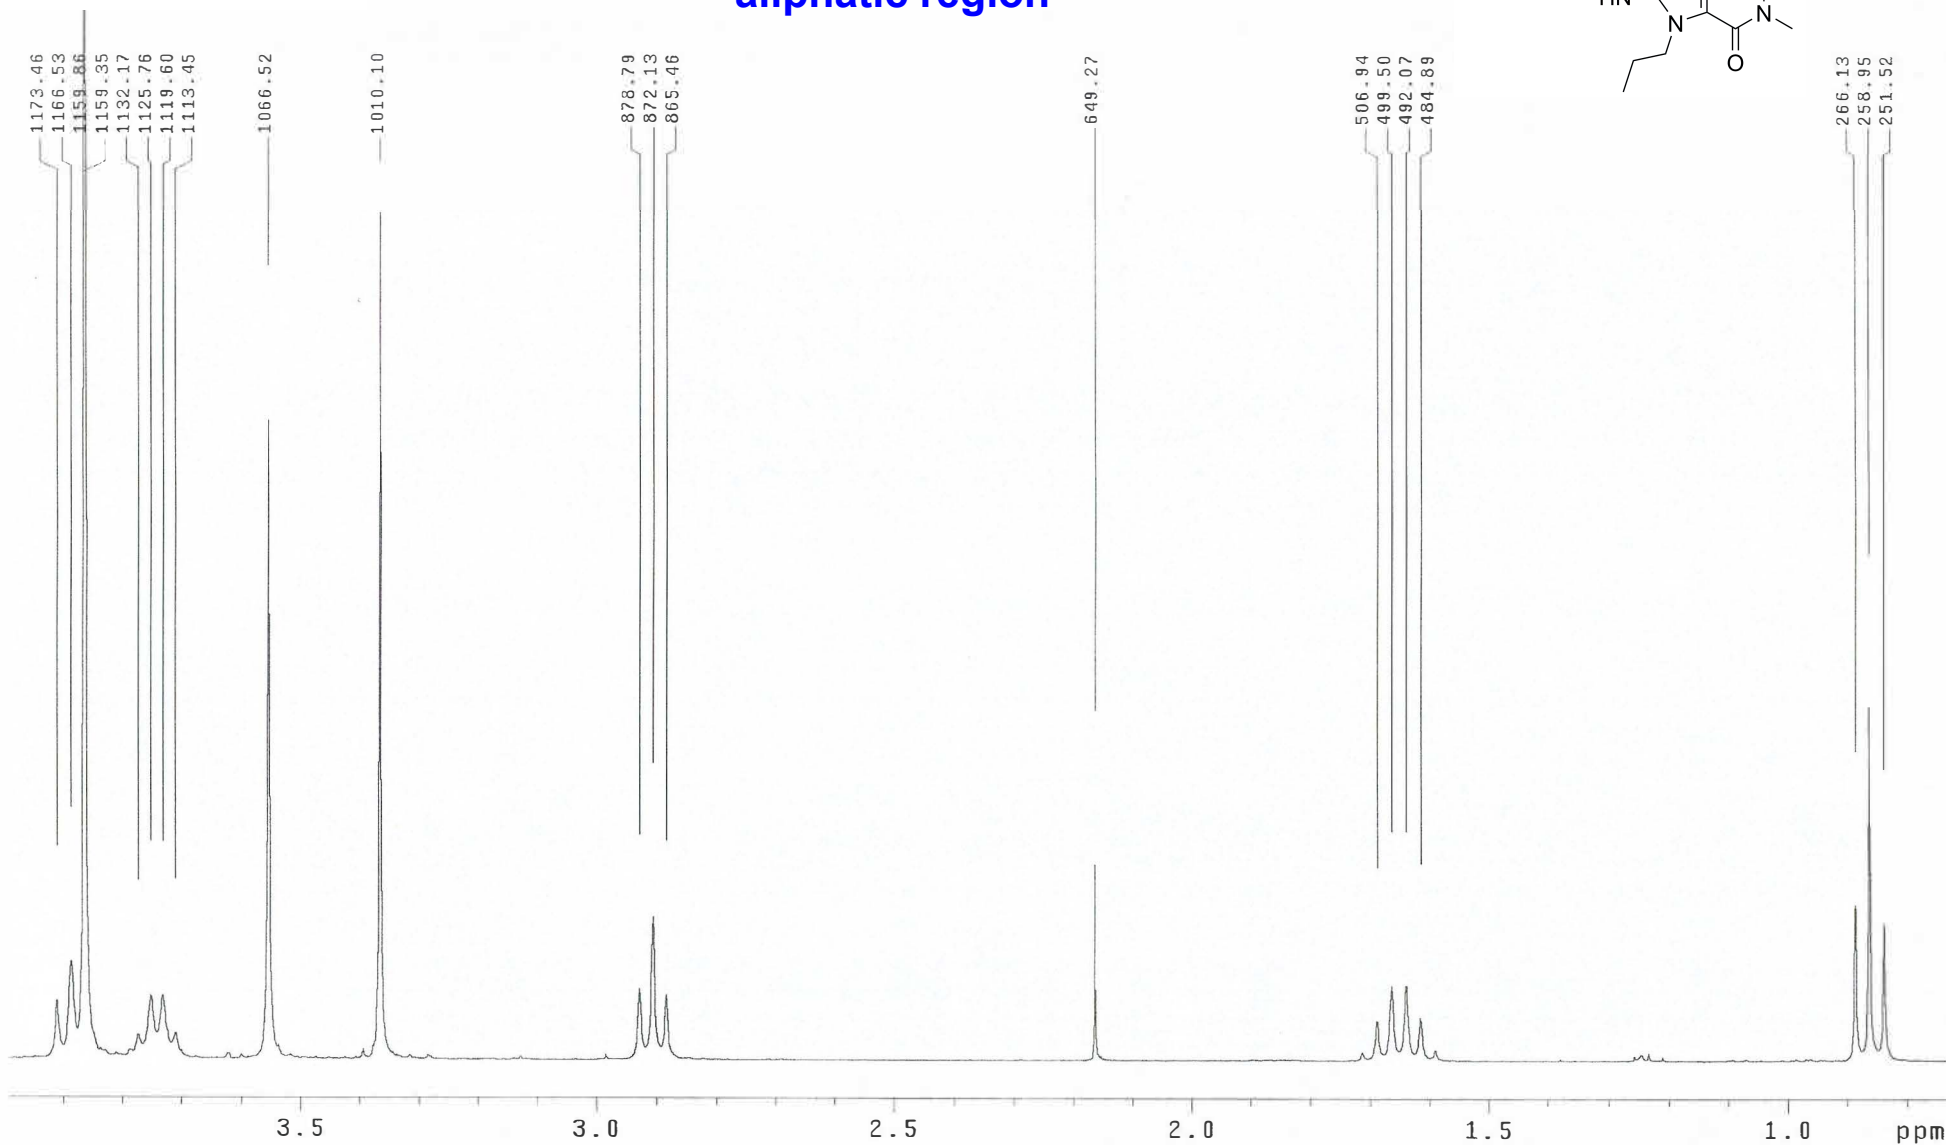

## Table of peaks

| INDEX | FREQUENCY           | PPM              | HEIGHT |
|-------|---------------------|------------------|--------|
| 1     | 2178.227            | 7.259            | 33.3   |
| 2     | 2050.515            | 6.833            | 9.4    |
| 3     | 2042.052            | 6.805            | 18.0   |
| 4     | 2024.870            | 6.748            | 5.2    |
| 5     | 2023.075            | 6.742            | 13.9   |
| 6     | 2021.536            | 6.737            | 16.6   |
| 7     | 2019.485            | 6.730            | 12.4   |
| 8     | 2016.407            | 6.720            | 7.8    |
| 9     | 2014.356            | 6.713            | 3.4    |
| 10    | 1274.240            | 4.246            | 2.8    |
| 11    | 1173.455            | 3.910            | 7.6    |
| 12    | 1166.531            | 3.887            | 12.7   |
| 13    | 1159.863            | 3.865            | 139.0  |
| 14    | <del>1159.350</del> | <del>3.863</del> | 144.0  |
| 15    | 1132.167            | 3.773            | 3.2    |
| 16    | 1125.755            | 3.752            | 8.3    |
| 17    | 1119.601            | 3.731            | 8.3    |
| 18    | 1113.446            | 3.711            | 3.4    |
| 19    | 1066.515            | 3.554            | 83.0   |
| 20    | 1010.096            | 3.366            | 109.7  |
| 21    | 878.794             | 2.929            | 9.2    |
| 22    | 872.126             | 2.906            | 18.5   |
| 23    | 865.458             | 2.884            | 8.4    |
| 24    | 649.271             | 2.164            | 25.4   |
| 25    | 506.941             | 1.689            | 5.1    |
| 26    | 499.504             | 1.665            | 9.7    |
| 27    | 492.067             | 1.640            | 9.8    |
| 28    | 484.886             | 1.616            | 5.6    |
| 29    | 266.134             | 0.887            | 20.2   |
| 30    | 258.954             | 0.863            | 45.9   |
| 31    | 251.517             | 0.838            | 17.9   |

# Compound 8c <sup>13</sup>C NMR

| No. | (ppm)  | (Hz)    | Height |
|-----|--------|---------|--------|
| 1   | 10.94  | 1100.8  | 0.2496 |
| 2   | 22.75  | 2289.3  | 0.1854 |
| 3   | 27.68  | 2785.2  | 0.1984 |
| 4   | 29.81  | 2999.4  | 0.1848 |
| 5   | 35.33  | 3555.5  | 0.1794 |
| 6   | 44.43  | 4471.0  | 0.1762 |
| 7   | 44.78  | 4506.2  | 0.1383 |
| 8   | 55.89  | 5624.2  | 0.1960 |
| 9   | 55.97  | 5632.3  | 0.2336 |
| 10  | 76.73  | 7721.5  | 0.9990 |
| 11  | 77.04  | 7753.1  | 0.9540 |
| 12  | 77.36  | 7785.4  | 1.0000 |
| 13  | 102.91 | 10356.6 | 0.0893 |
| 14  | 111.39 | 11209.1 | 0.1798 |
| 15  | 111.90 | 11261.1 | 0.1730 |
| 16  | 120.77 | 12153.9 | 0.1823 |
| 17  | 130.93 | 13175.8 | 0.1278 |
| 18  | 147.94 | 14887.3 | 0.1138 |
| 19  | 148.31 | 14924.7 | 0.0376 |
| 20  | 149.24 | 15018.6 | 0.1230 |
| 21  | 151.74 | 15270.2 | 0.0885 |
| 22  | 152.42 | 15338.5 | 0.0962 |
| 23  | 153.89 | 15486.7 | 0.1070 |

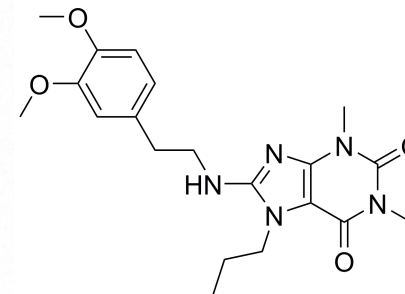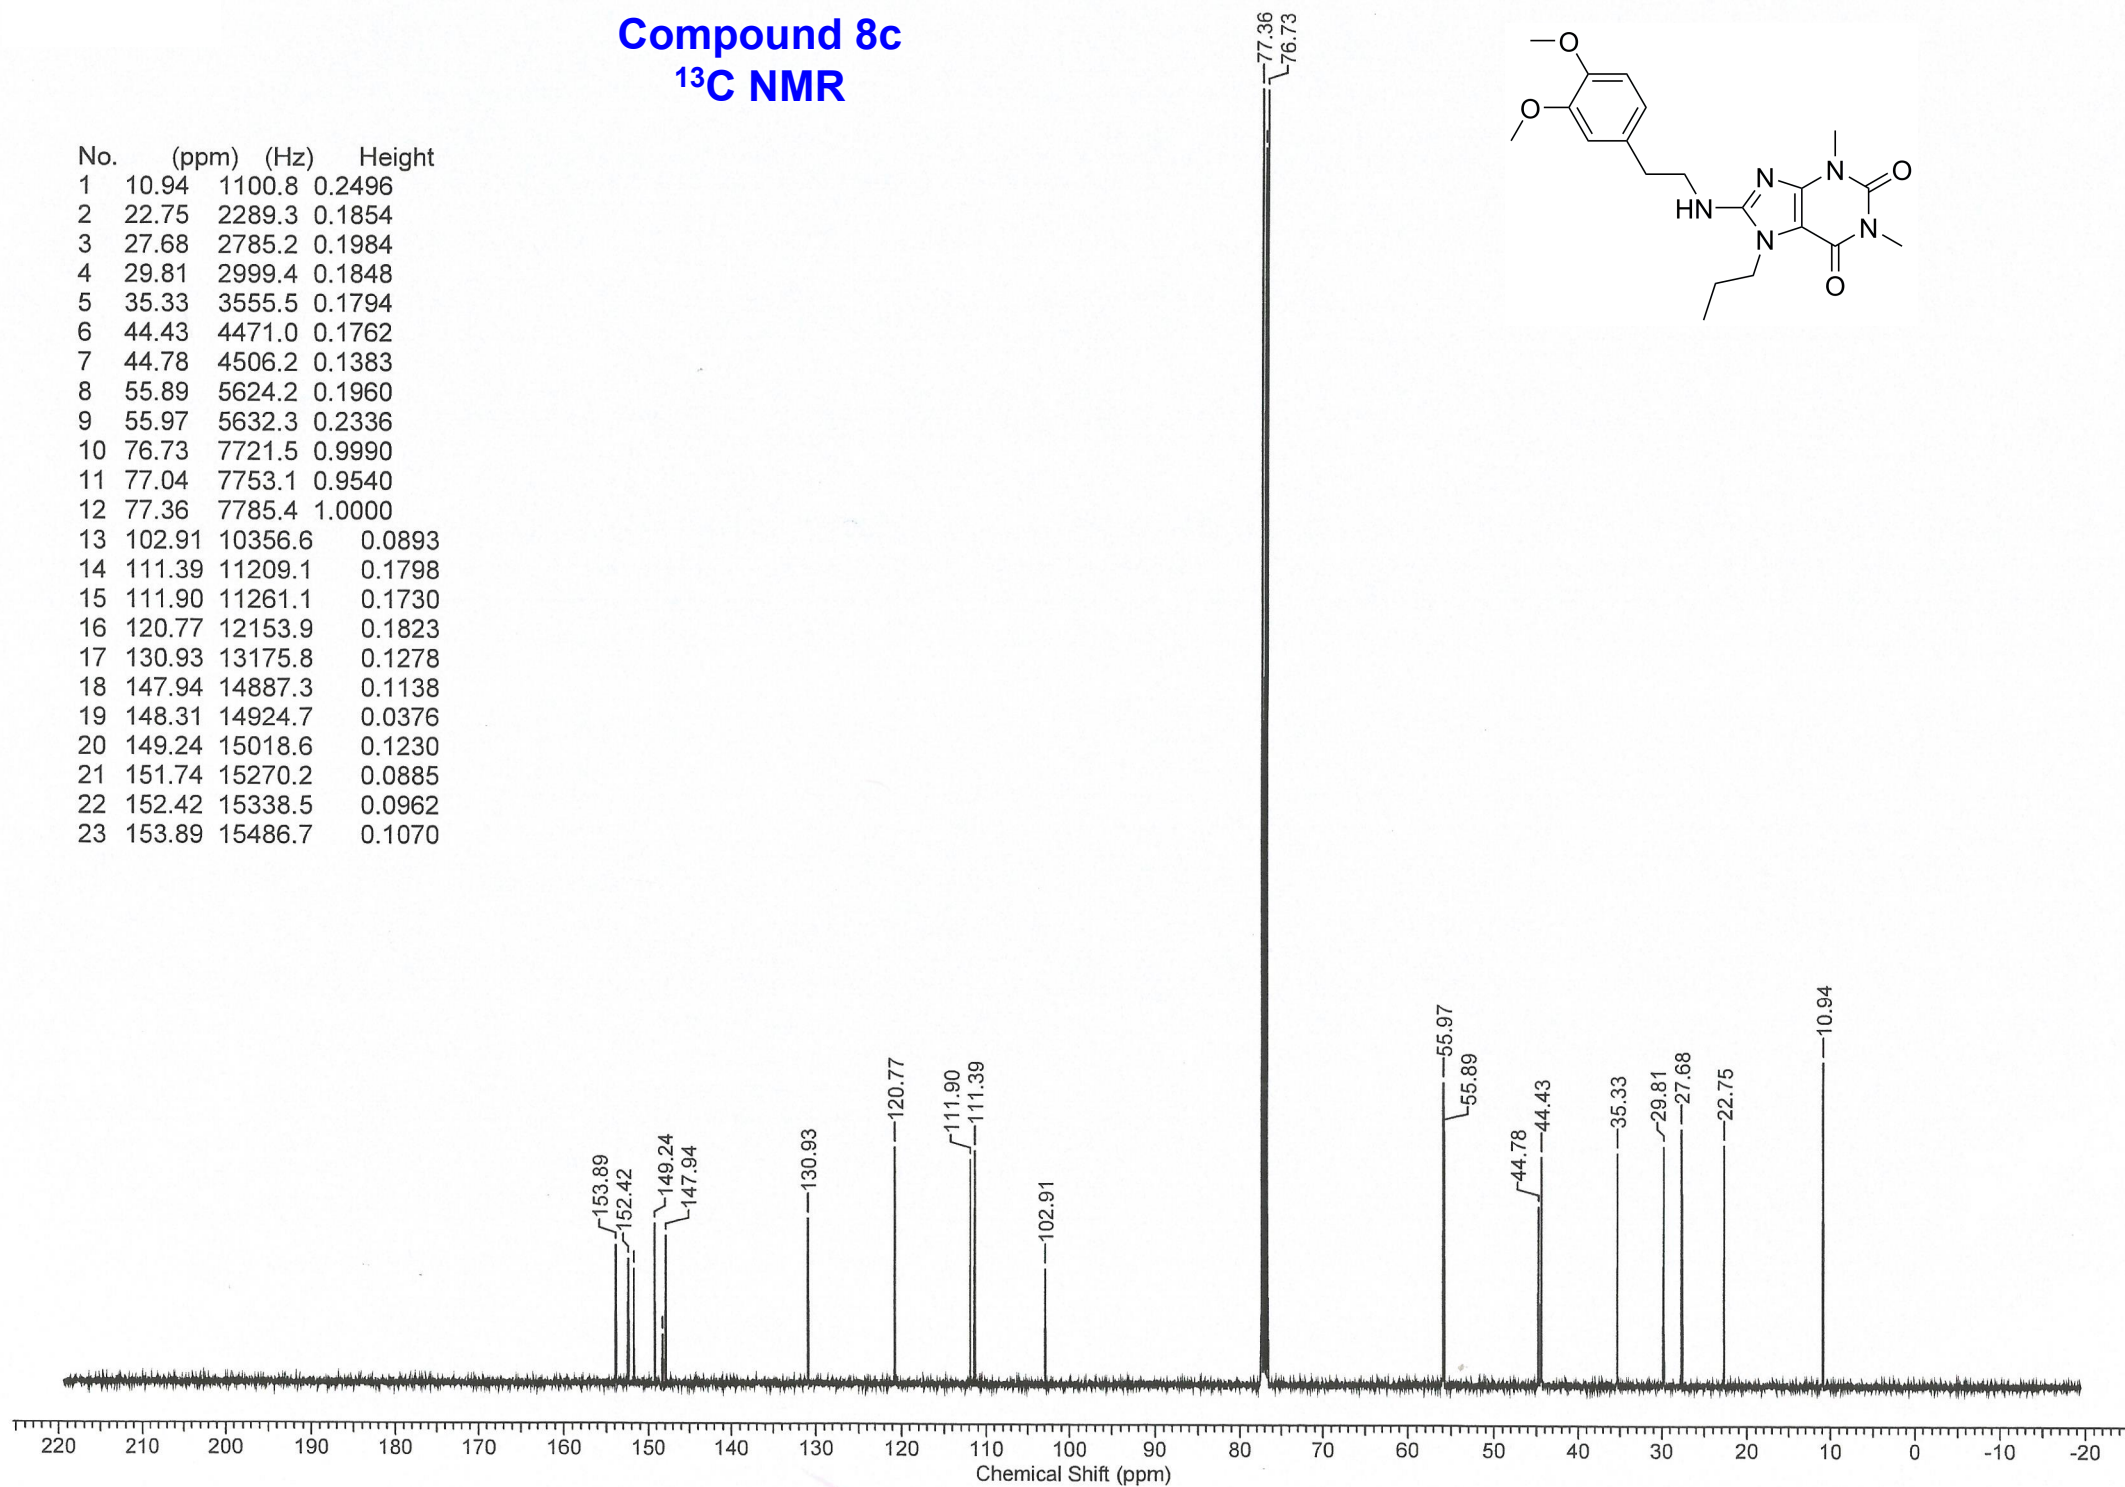

Compound 8d  
<sup>1</sup>H NMR

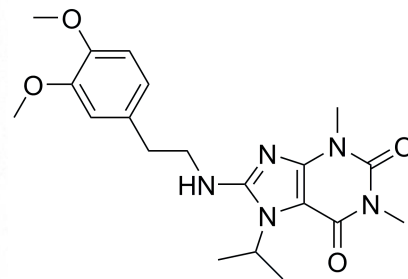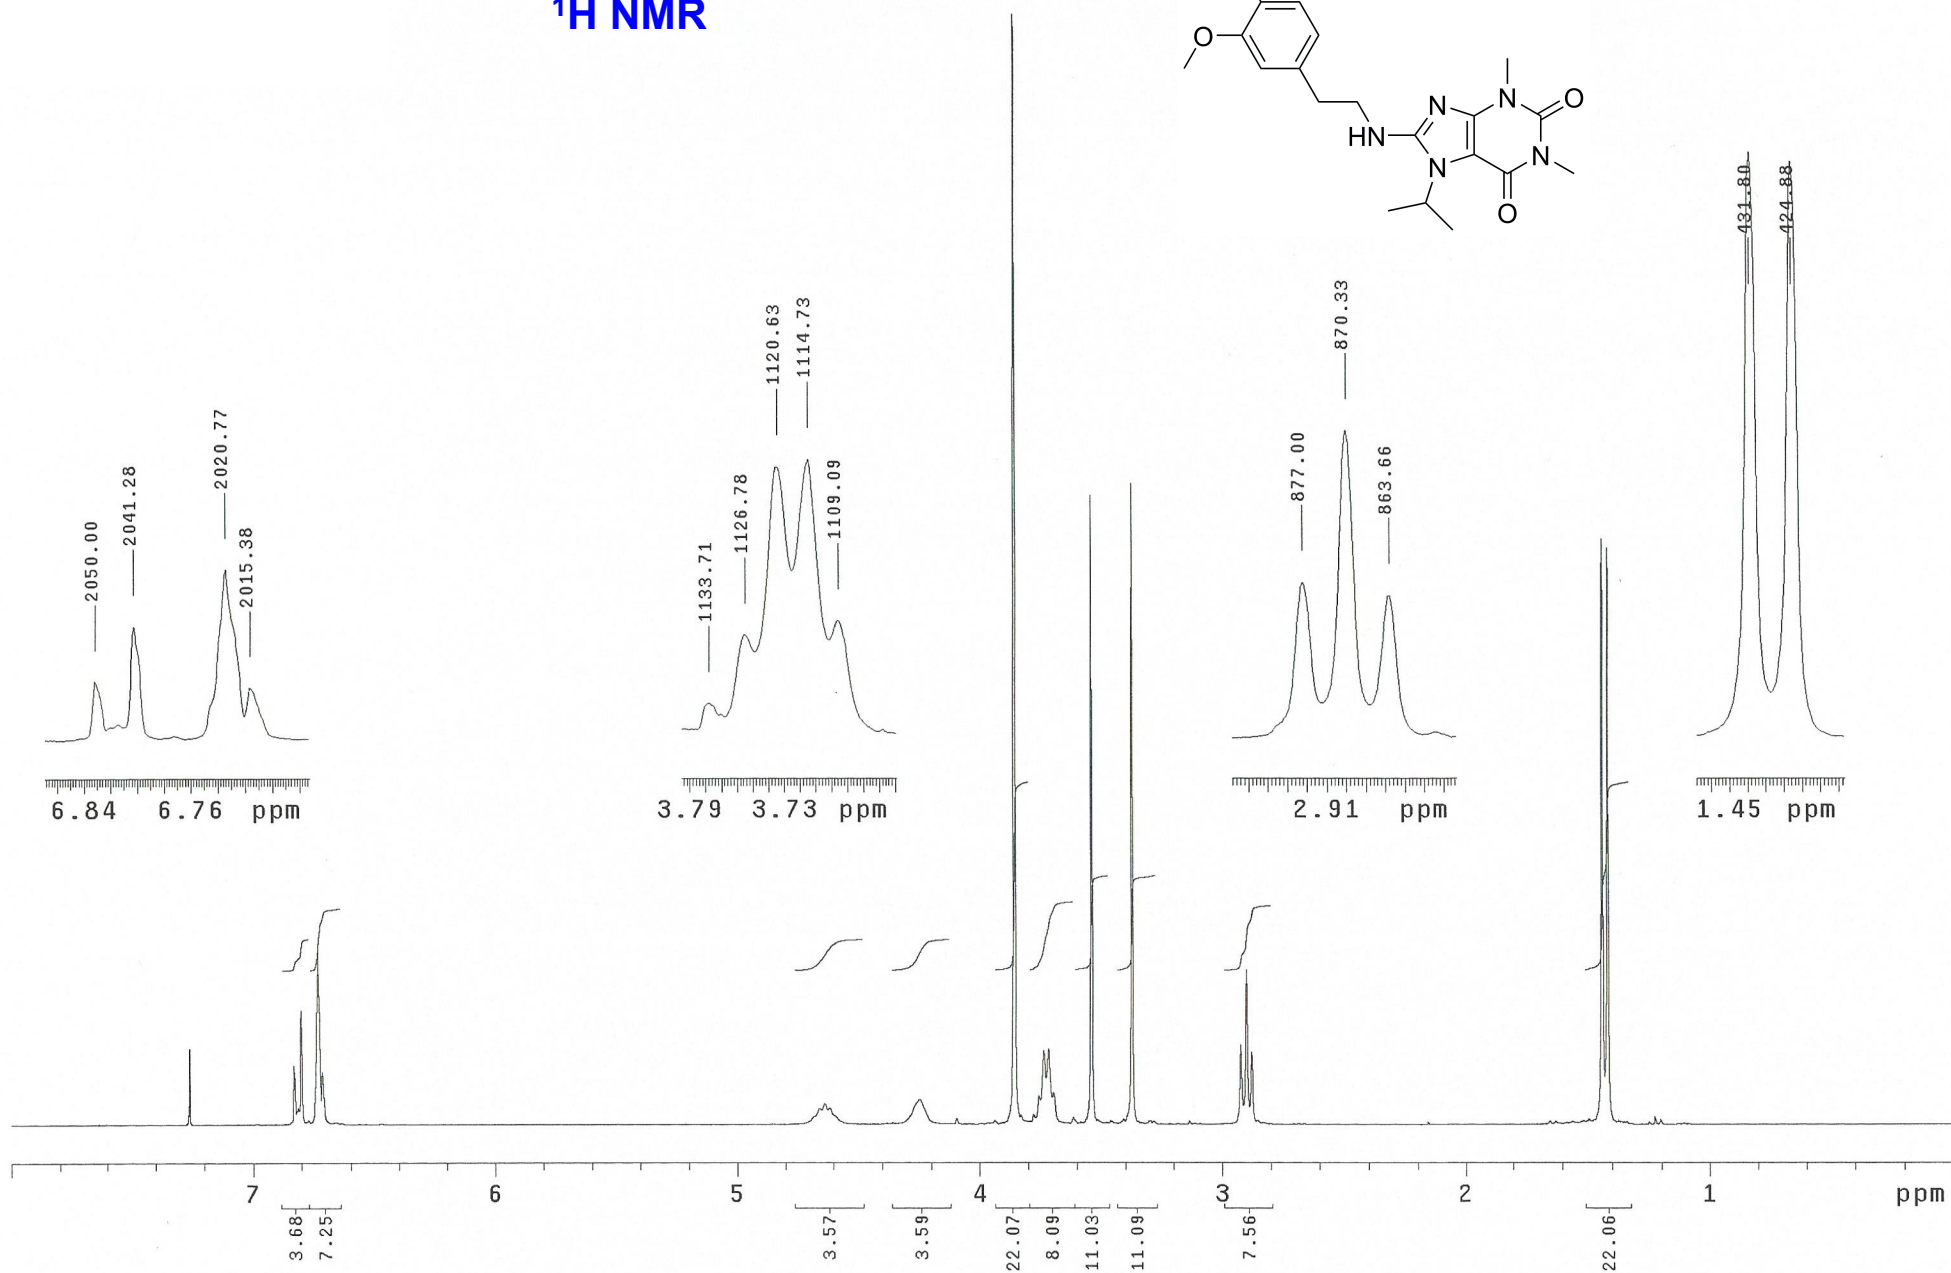

## Table of peaks

| INDEX | FREQUENCY | PPM   | HEIGHT |
|-------|-----------|-------|--------|
| 1     | 2177.458  | 7.256 | 9.9    |
| 2     | 2050.002  | 6.832 | 7.7    |
| 3     | 2041.283  | 6.802 | 14.8   |
| 4     | 2020.767  | 6.734 | 22.3   |
| 5     | 2015.381  | 6.716 | 6.9    |
| 6     | 1391.181  | 4.636 | 2.7    |
| 7     | 1273.984  | 4.245 | 3.3    |
| 8     | 1157.555  | 3.858 | 144.0  |
| 9     | 1126.781  | 3.755 | 3.7    |
| 10    | 1120.626  | 3.734 | 9.5    |
| 11    | 1114.728  | 3.715 | 9.8    |
| 12    | 1109.086  | 3.696 | 4.2    |
| 13    | 1062.412  | 3.540 | 81.8   |
| 14    | 1061.386  | 3.537 | 57.8   |
| 15    | 1012.404  | 3.374 | 83.3   |
| 16    | 876.999   | 2.923 | 10.3   |
| 17    | 870.331   | 2.900 | 20.1   |
| 18    | 863.663   | 2.878 | 9.4    |
| 19    | 431.801   | 1.439 | 76.1   |
| 20    | 424.877   | 1.416 | 74.9   |

# Compound 8d

## <sup>13</sup>C NMR

| No. | (ppm)  | (Hz)    | Height |
|-----|--------|---------|--------|
| 1   | 21.08  | 2121.3  | 0.4448 |
| 2   | 27.99  | 2816.7  | 0.2303 |
| 3   | 29.78  | 2996.5  | 0.1862 |
| 4   | 35.28  | 3550.3  | 0.1955 |
| 5   | 44.73  | 4501.1  | 0.2072 |
| 6   | 47.13  | 4742.4  | 0.1559 |
| 7   | 55.90  | 5624.9  | 0.2649 |
| 8   | 55.98  | 5633.0  | 0.2926 |
| 9   | 76.74  | 7722.3  | 0.9200 |
| 10  | 77.05  | 7753.8  | 1.0000 |
| 11  | 77.37  | 7786.1  | 0.9558 |
| 12  | 102.68 | 10333.1 | 0.0838 |
| 13  | 111.41 | 11211.3 | 0.2255 |
| 14  | 111.93 | 11263.3 | 0.2266 |
| 15  | 120.82 | 12158.3 | 0.2623 |
| 16  | 131.05 | 13187.6 | 0.1561 |
| 17  | 147.94 | 14887.3 | 0.1359 |
| 18  | 149.01 | 14995.1 | 0.0450 |
| 19  | 149.25 | 15019.3 | 0.1363 |
| 20  | 151.71 | 15267.3 | 0.0940 |
| 21  | 152.13 | 15309.1 | 0.1146 |
| 22  | 153.69 | 15466.1 | 0.0959 |

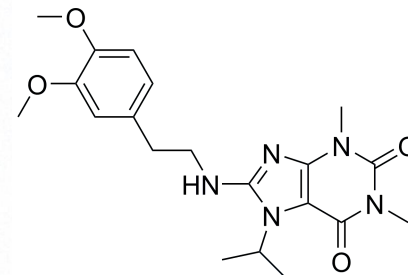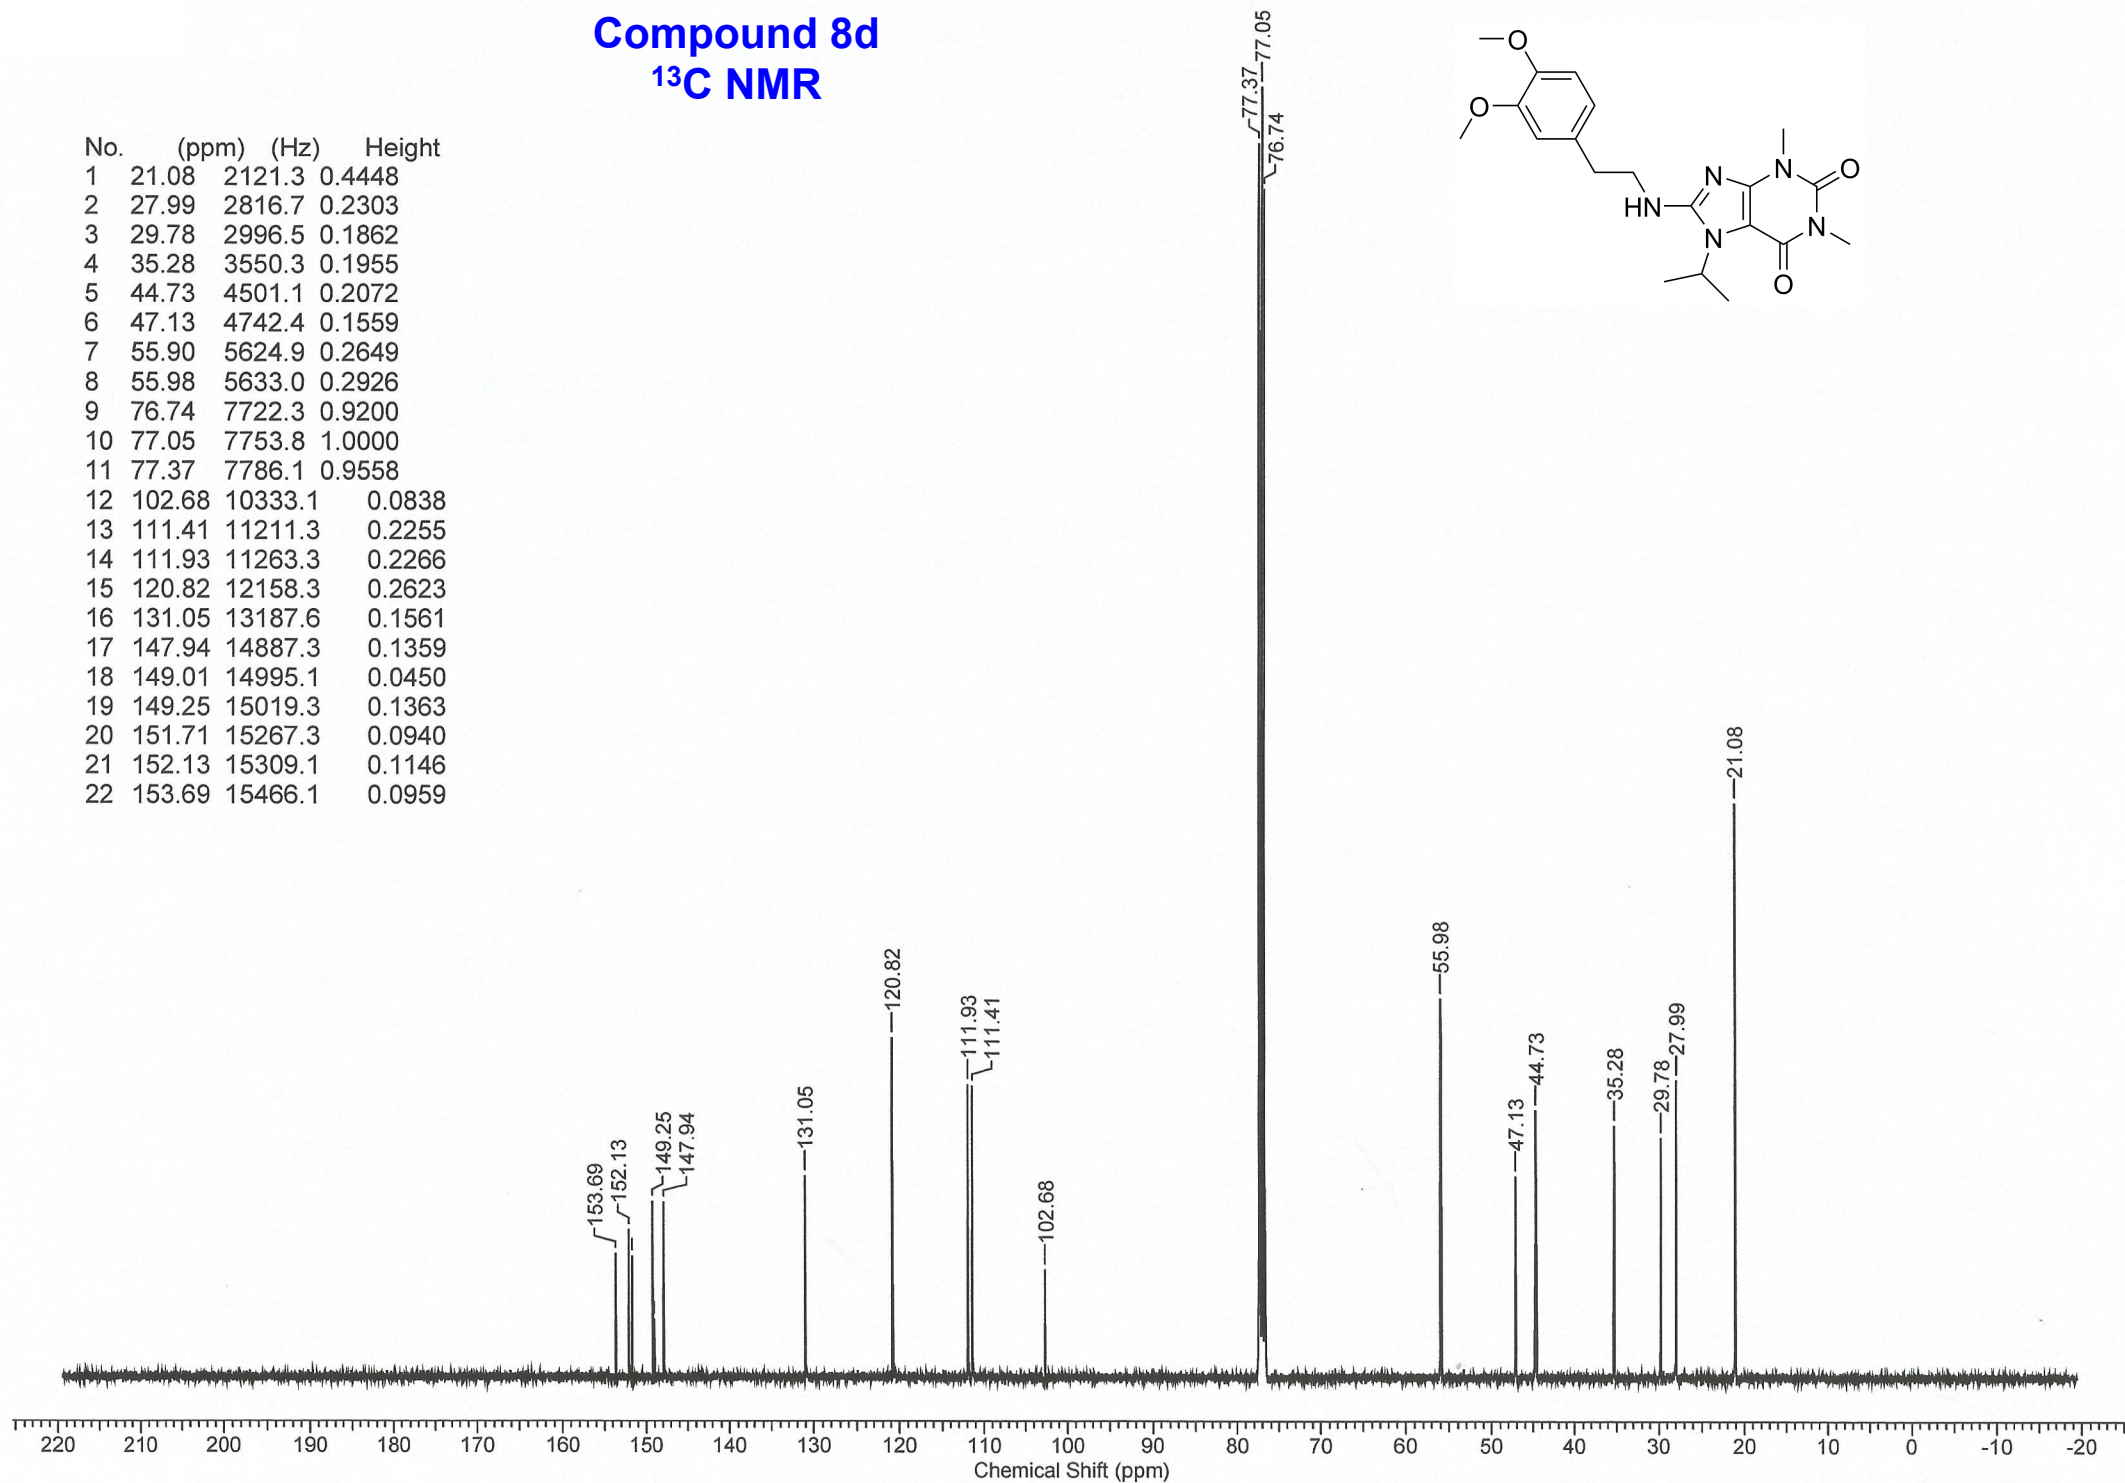

**Compound 8e**  
 **$^1\text{H}$  NMR - zoom of**  
**the aromatic region**

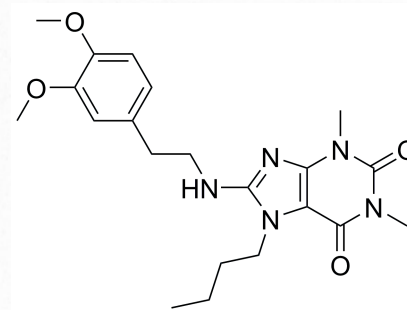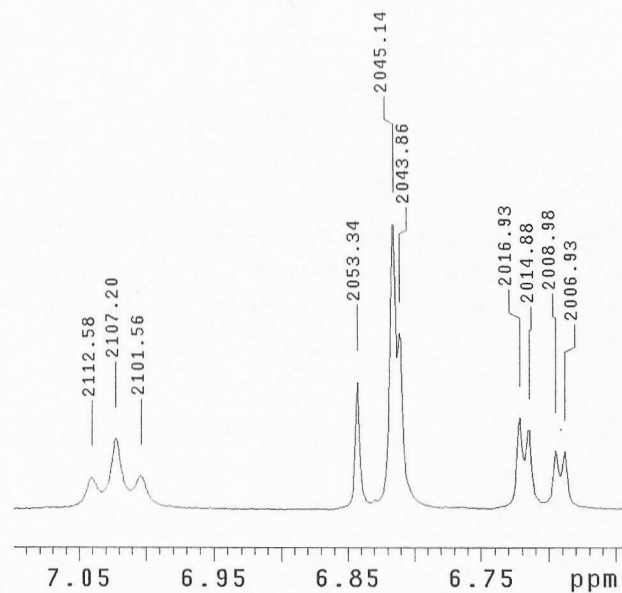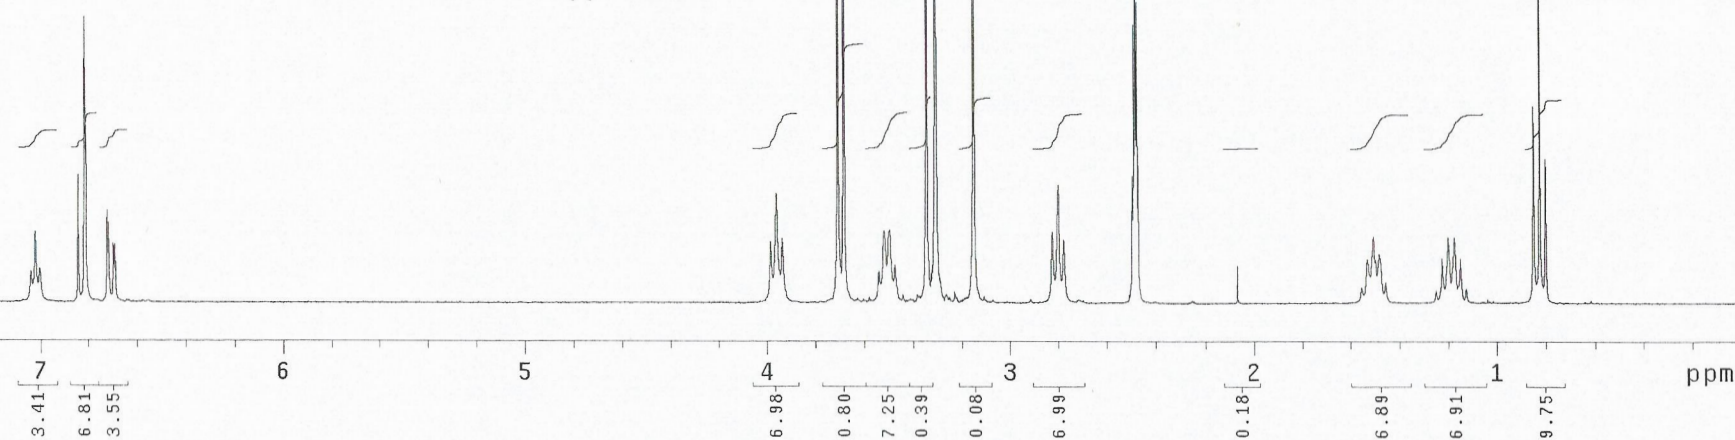

**Compound 8e**  
**<sup>1</sup>H NMR - zoom of the**  
**aliphatic region**

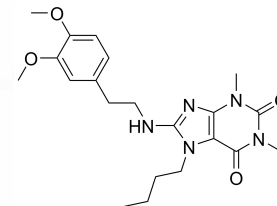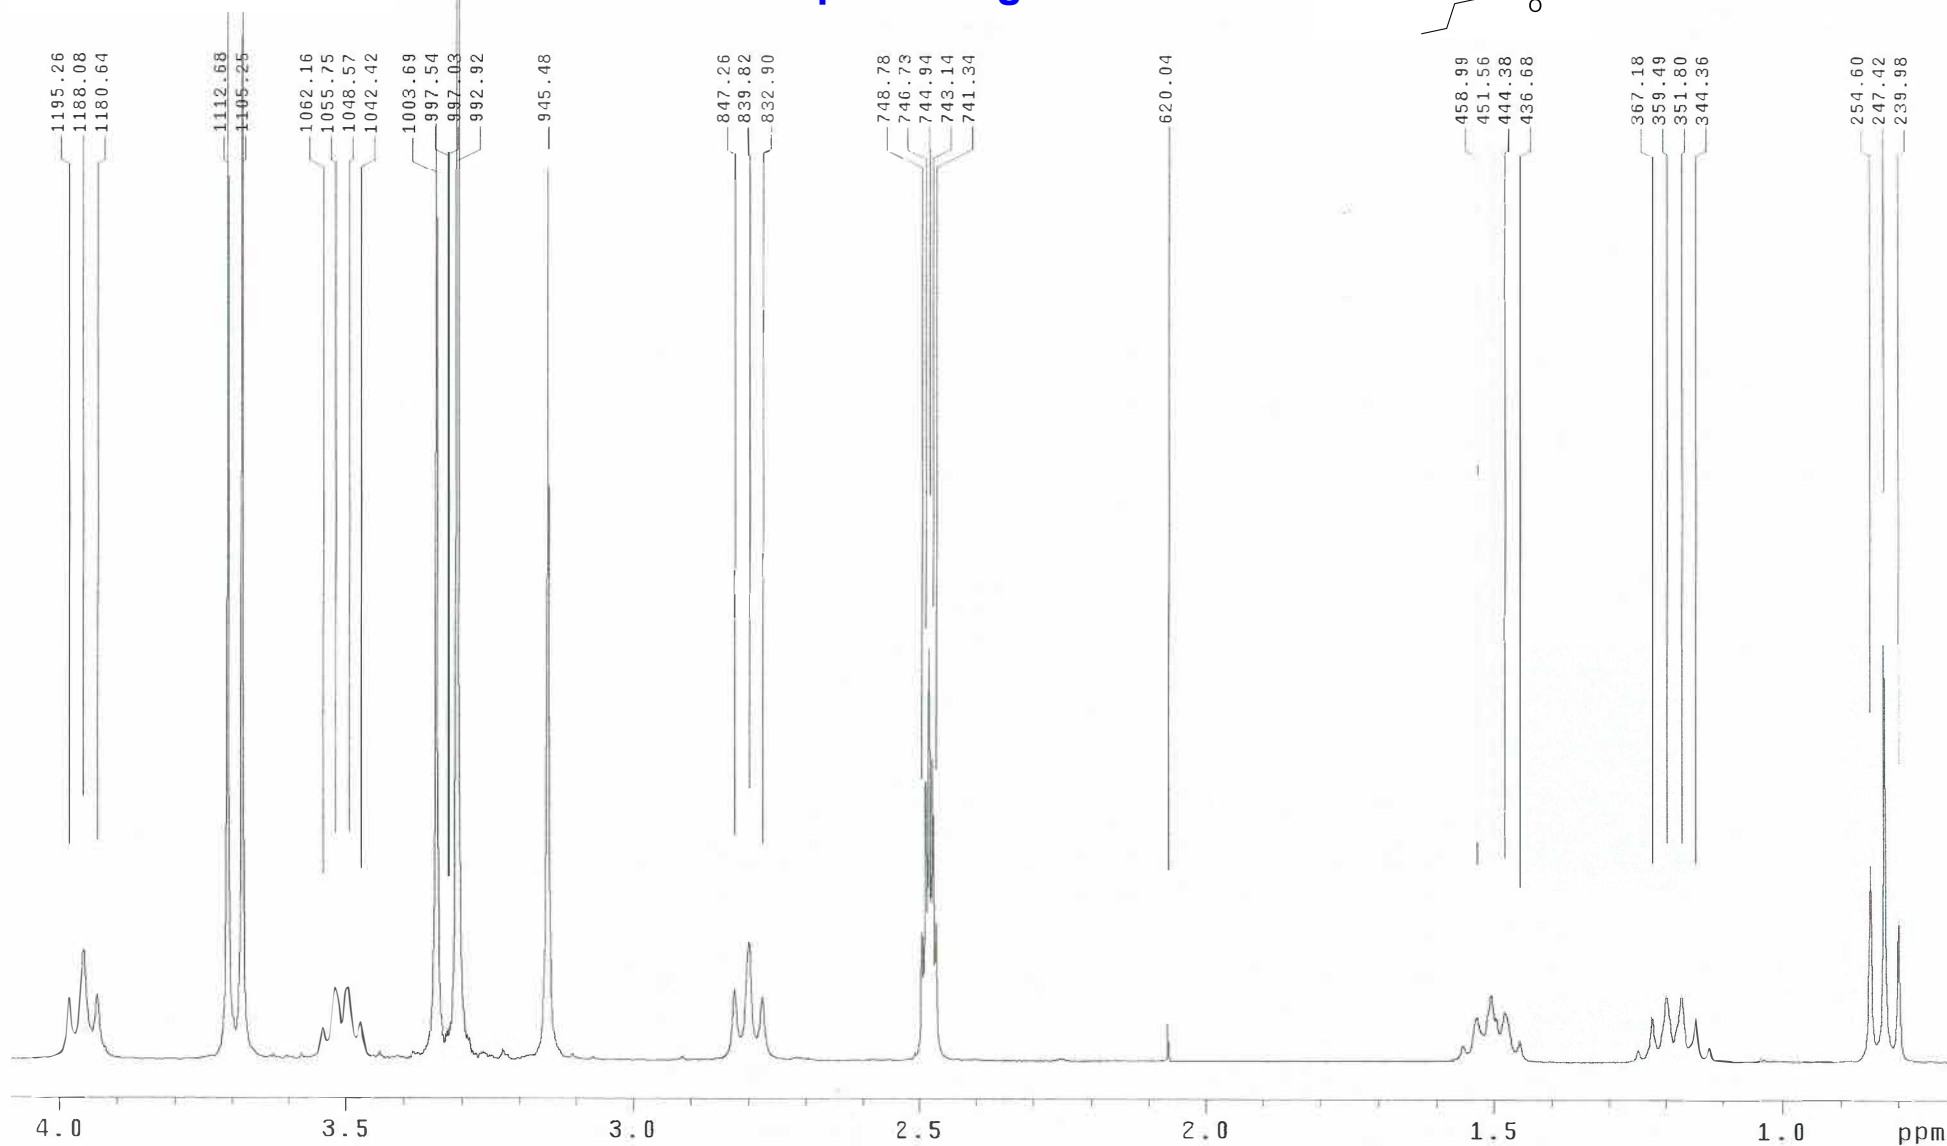

## Table of peaks

| INDEX | FREQUENCY | PPM   | HEIGHT | INDEX | FREQUENCY | PPM   | HEIGHT |
|-------|-----------|-------|--------|-------|-----------|-------|--------|
| 1     | 2112.584  | 7.040 | 4.0    | 40    | 744.935   | 2.482 | 53.4   |
| 2     | 2107.199  | 7.022 | 9.1    | 41    | 743.140   | 2.476 | 39.0   |
| 3     | 2101.557  | 7.003 | 4.3    | 42    | 741.345   | 2.470 | 17.8   |
| 4     | 2053.344  | 6.843 | 16.5   | 43    | 620.044   | 2.066 | 4.8    |
| 5     | 2045.138  | 6.815 | 37.0   | 44    | 458.993   | 1.530 | 5.7    |
| 6     | 2043.856  | 6.811 | 22.9   | 45    | 451.556   | 1.505 | 8.6    |
| 7     | 2016.928  | 6.721 | 11.9   | 46    | 448.735   | 1.495 | 5.6    |
| 8     | 2014.877  | 6.714 | 10.3   | 47    | 444.376   | 1.481 | 6.5    |
| 9     | 2008.979  | 6.695 | 7.6    | 48    | 436.682   | 1.455 | 2.7    |
| 10    | 2006.927  | 6.688 | 7.5    | 49    | 367.184   | 1.224 | 5.8    |
| 11    | 1195.262  | 3.983 | 7.9    | 50    | 359.491   | 1.198 | 8.6    |
| 12    | 1188.081  | 3.959 | 14.3   | 51    | 351.797   | 1.172 | 8.6    |
| 13    | 1180.644  | 3.934 | 8.4    | 52    | 344.360   | 1.148 | 5.7    |
| 14    | 1112.685  | 3.708 | 147.7  | 53    | 254.602   | 0.848 | 25.6   |
| 15    | 1105.248  | 3.683 | 144.3  | 54    | 247.422   | 0.825 | 54.1   |
| 16    | 1062.164  | 3.540 | 4.2    | 55    | 239.985   | 0.800 | 18.7   |
| 17    | 1055.753  | 3.518 | 9.4    |       |           |       |        |
| 18    | 1048.572  | 3.494 | 9.5    |       |           |       |        |
| 19    | 1042.418  | 3.474 | 4.9    |       |           |       |        |
| 20    | 1003.694  | 3.345 | 121.2  |       |           |       |        |
| 21    | 999.077   | 3.329 | 2.6    |       |           |       |        |
| 22    | 998.565   | 3.328 | 2.8    |       |           |       |        |
| 23    | 998.052   | 3.326 | 3.3    |       |           |       |        |
| 24    | 997.539   | 3.324 | 3.8    |       |           |       |        |
| 25    | 997.026   | 3.323 | 3.9    |       |           |       |        |
| 26    | 996.513   | 3.321 | 4.3    |       |           |       |        |
| 27    | 996.000   | 3.319 | 4.9    |       |           |       |        |
| 28    | 992.923   | 3.309 | 565.4  |       |           |       |        |
| 29    | 988.307   | 3.293 | 3.8    |       |           |       |        |
| 30    | 987.794   | 3.292 | 3.3    |       |           |       |        |
| 31    | 987.281   | 3.290 | 3.2    |       |           |       |        |
| 32    | 986.768   | 3.288 | 3.0    |       |           |       |        |
| 33    | 986.255   | 3.287 | 2.8    |       |           |       |        |
| 34    | 945.479   | 3.151 | 115.3  |       |           |       |        |
| 35    | 847.259   | 2.823 | 9.2    |       |           |       |        |
| 36    | 839.822   | 2.799 | 15.4   |       |           |       |        |
| 37    | 832.898   | 2.776 | 8.2    |       |           |       |        |
| 38    | 748.782   | 2.495 | 16.5   |       |           |       |        |
| 39    | 746.730   | 2.488 | 36.2   |       |           |       |        |

COc1ccc(OC)cc1CCNC2=NC3=C(NC(=O)N(C)C3=O)N(CCC)N2

| No. | (ppm)  | (Hz)    | Height |
|-----|--------|---------|--------|
| 1   | 14.05  | 1060.3  | 0.2041 |
| 2   | 19.49  | 1471.1  | 0.2037 |
| 3   | 27.61  | 2083.6  | 0.0808 |
| 4   | 27.63  | 2084.8  | 0.0777 |
| 5   | 29.64  | 2236.8  | 0.0568 |
| 6   | 29.66  | 2238.5  | 0.0582 |
| 7   | 31.63  | 2386.6  | 0.1785 |
| 8   | 35.24  | 2659.2  | 0.1295 |
| 9   | 39.15  | 2954.4  | 0.1349 |
| 10  | 39.43  | 2975.4  | 0.4208 |
| 11  | 39.71  | 2996.4  | 0.8468 |
| 12  | 39.99  | 3017.4  | 1.0000 |
| 13  | 40.26  | 3038.5  | 0.8577 |
| 14  | 40.54  | 3059.5  | 0.4316 |
| 15  | 40.81  | 3079.9  | 0.1436 |
| 16  | 42.59  | 3214.3  | 0.0874 |
| 17  | 44.59  | 3365.2  | 0.0893 |
| 18  | 55.80  | 4210.5  | 0.0767 |
| 19  | 55.82  | 4212.2  | 0.0763 |
| 20  | 55.96  | 4223.3  | 0.0739 |
| 21  | 55.99  | 4225.5  | 0.0687 |
| 22  | 101.83 | 7684.2  | 0.1134 |
| 23  | 112.35 | 8478.2  | 0.1745 |
| 24  | 113.11 | 8535.7  | 0.1743 |
| 25  | 121.07 | 9136.1  | 0.1815 |
| 26  | 132.37 | 9989.2  | 0.1754 |
| 27  | 147.71 | 11146.3 | 0.1301 |
| 28  | 148.98 | 11242.5 | 0.1009 |
| 29  | 149.08 | 11250.3 | 0.1501 |
| 30  | 151.42 | 11426.6 | 0.1153 |
| 31  | 153.02 | 11547.7 | 0.1298 |
| 32  | 153.69 | 11598.0 | 0.1854 |

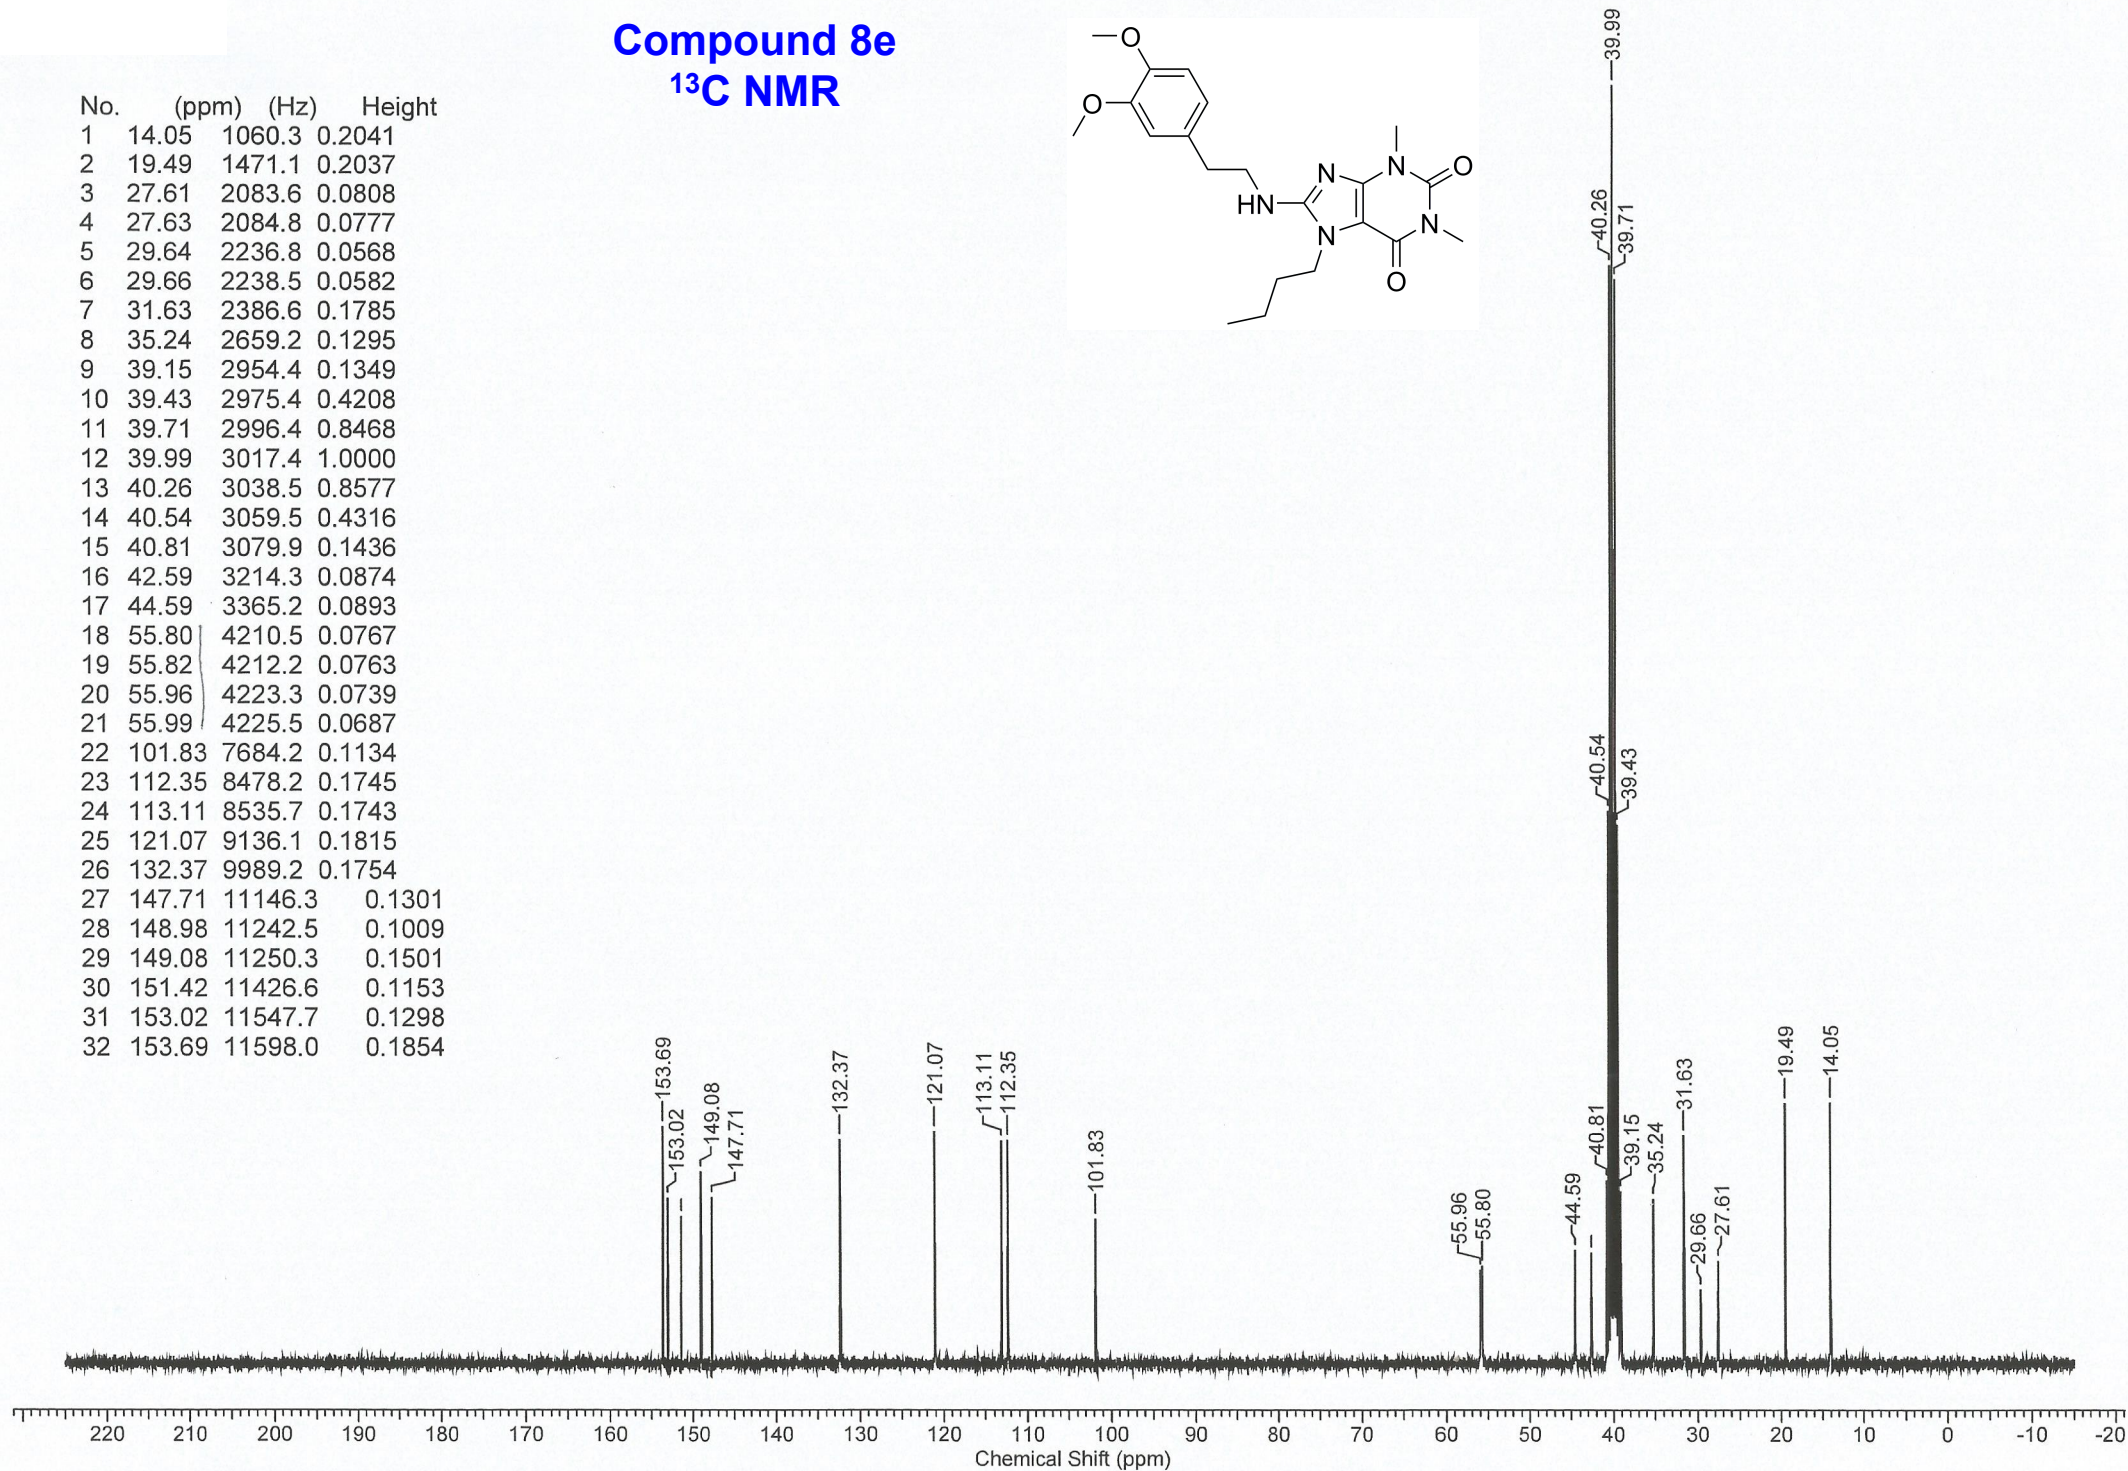

**Compound 8f**  
 **$^1\text{H}$  NMR - zoom of**  
**the aromatic region**

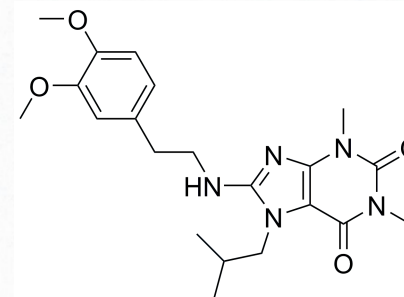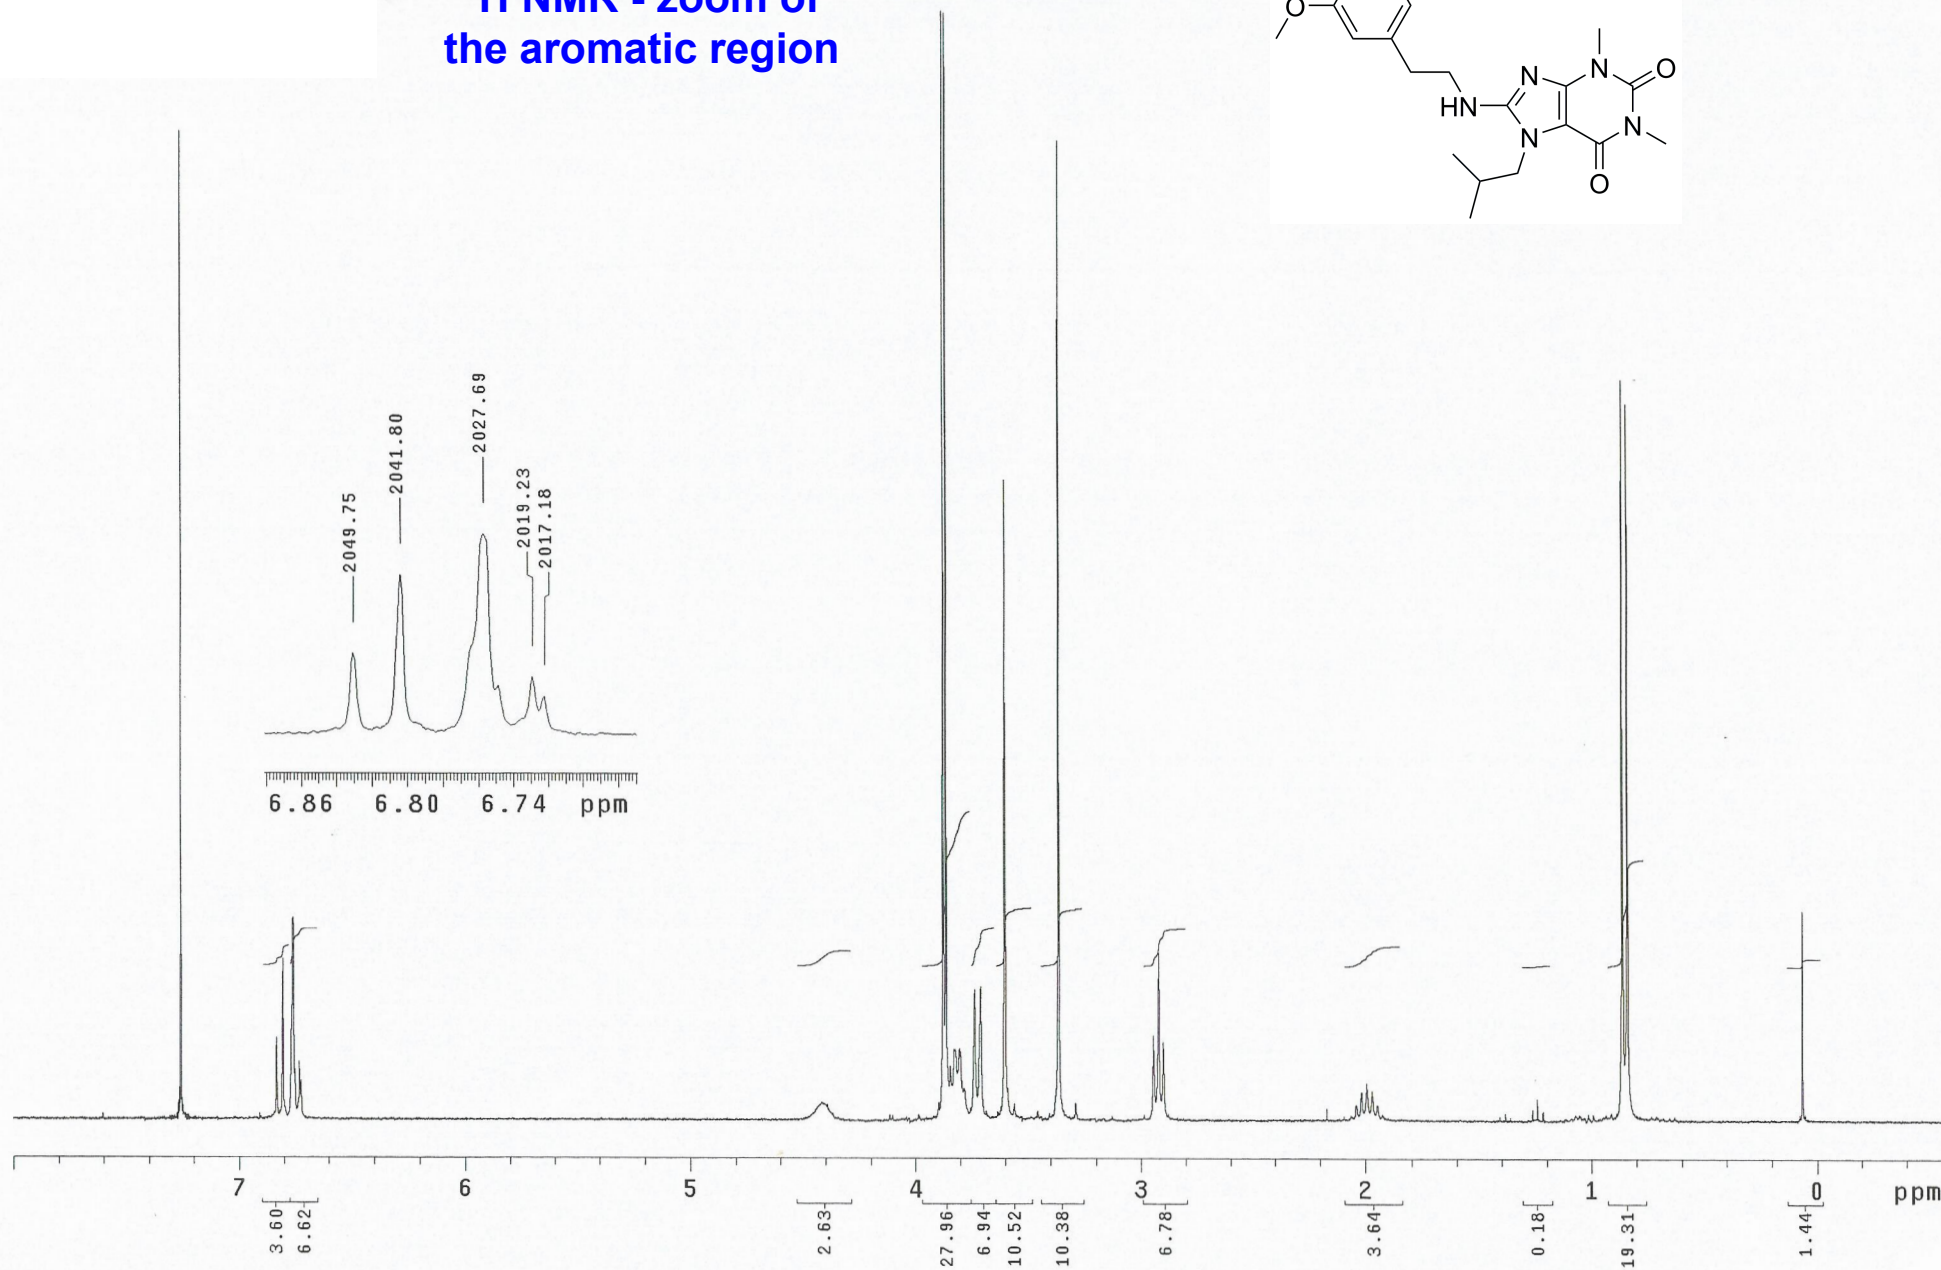

**Compound 8f**  
 **$^1\text{H}$  NMR - zoom of the**  
**aliphatic region**

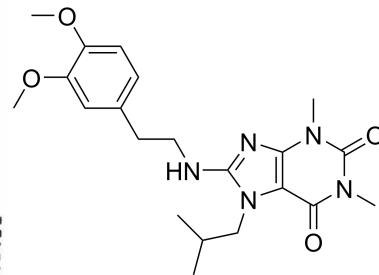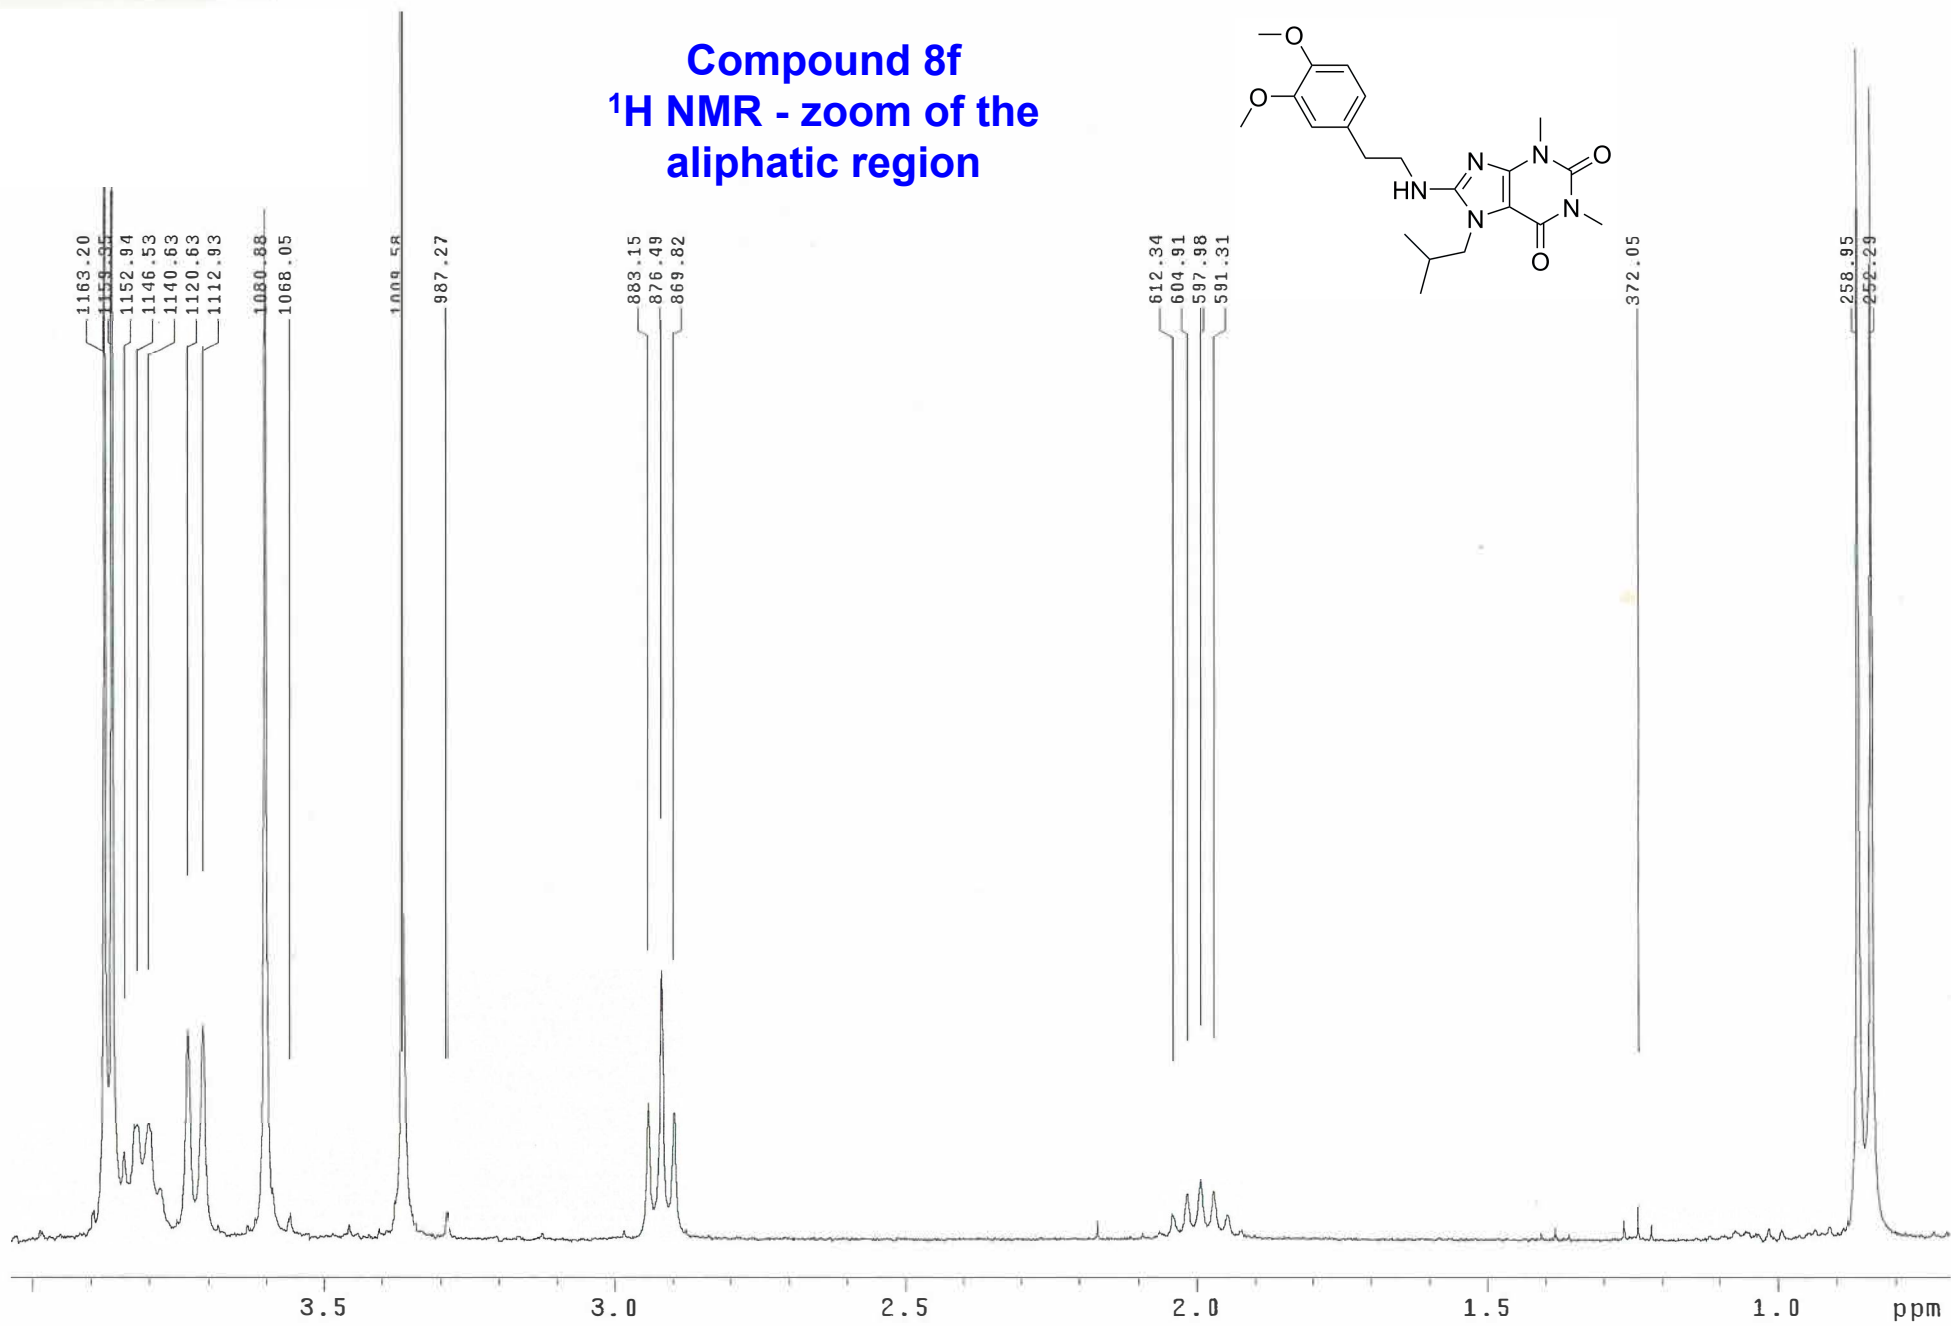

## Table of peaks

| INDEX | FREQUENCY | PPM   | HEIGHT |
|-------|-----------|-------|--------|
| 1     | 2180.022  | 7.265 | 2.8    |
| 2     | 2179.509  | 7.263 | 4.1    |
| 3     | 2178.997  | 7.261 | 7.1    |
| 4     | 2177.971  | 7.258 | 128.2  |
| 5     | 2177.201  | 7.255 | 10.8   |
| 6     | 2176.689  | 7.254 | 4.9    |
| 7     | 2176.176  | 7.252 | 2.7    |
| 8     | 2049.746  | 6.831 | 10.6   |
| 9     | 2041.796  | 6.804 | 20.8   |
| 10    | 2027.691  | 6.757 | 26.2   |
| 11    | 2025.126  | 6.749 | 6.5    |
| 12    | 2019.228  | 6.729 | 7.5    |
| 13    | 2017.176  | 6.722 | 5.0    |
| 14    | 1163.197  | 3.876 | 144.0  |
| 15    | 1159.350  | 3.863 | 143.8  |
| 16    | 1152.939  | 3.842 | 7.0    |
| 17    | 1146.528  | 3.821 | 9.3    |
| 18    | 1140.630  | 3.801 | 9.3    |
| 19    | 1134.988  | 3.782 | 4.2    |
| 20    | 1120.626  | 3.734 | 17.0   |
| 21    | 1112.933  | 3.709 | 17.4   |
| 22    | 1080.877  | 3.602 | 83.3   |
| 23    | 1077.030  | 3.589 | 4.2    |
| 24    | 1009.583  | 3.364 | 127.1  |
| 25    | 883.154   | 2.943 | 11.0   |
| 26    | 876.486   | 2.921 | 21.7   |
| 27    | 869.818   | 2.899 | 10.2   |
| 28    | 604.905   | 2.016 | 3.7    |
| 29    | 597.981   | 1.993 | 4.8    |
| 30    | 591.313   | 1.971 | 3.8    |
| 31    | 372.048   | 1.240 | 2.8    |
| 32    | 258.954   | 0.863 | 96.3   |
| 33    | 252.286   | 0.841 | 93.2   |
| 34    | 19.173    | 0.064 | 27.3   |

# Compound 8f

## <sup>13</sup>C NMR

| No. | (ppm)  | (Hz)    | Height |
|-----|--------|---------|--------|
| 1   | 19.70  | 1982.6  | 0.5730 |
| 2   | 27.68  | 2785.9  | 0.3126 |
| 3   | 28.92  | 2910.6  | 0.3000 |
| 4   | 29.78  | 2997.2  | 0.2791 |
| 5   | 35.29  | 3551.0  | 0.2445 |
| 6   | 44.40  | 4468.0  | 0.2490 |
| 7   | 50.49  | 5080.6  | 0.2154 |
| 8   | 55.89  | 5624.2  | 0.3337 |
| 9   | 55.98  | 5633.0  | 0.3469 |
| 10  | 76.74  | 7722.3  | 0.9942 |
| 11  | 77.06  | 7754.6  | 1.0000 |
| 12  | 77.37  | 7786.1  | 0.9669 |
| 13  | 103.18 | 10383.8 | 0.1249 |
| 14  | 111.39 | 11209.8 | 0.2350 |
| 15  | 111.90 | 11260.4 | 0.2279 |
| 16  | 120.78 | 12154.7 | 0.2878 |
| 17  | 130.90 | 13172.9 | 0.1777 |
| 18  | 147.95 | 14888.8 | 0.1467 |
| 19  | 148.31 | 14924.7 | 0.0657 |
| 20  | 149.26 | 15020.8 | 0.1378 |
| 21  | 151.74 | 15270.2 | 0.1126 |
| 22  | 152.68 | 15364.1 | 0.1408 |
| 23  | 153.86 | 15483.0 | 0.1181 |

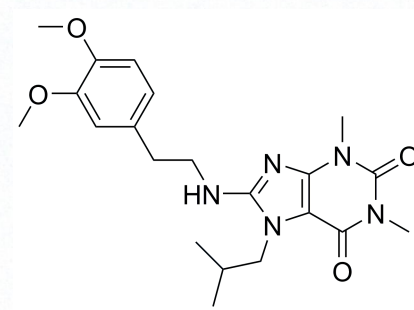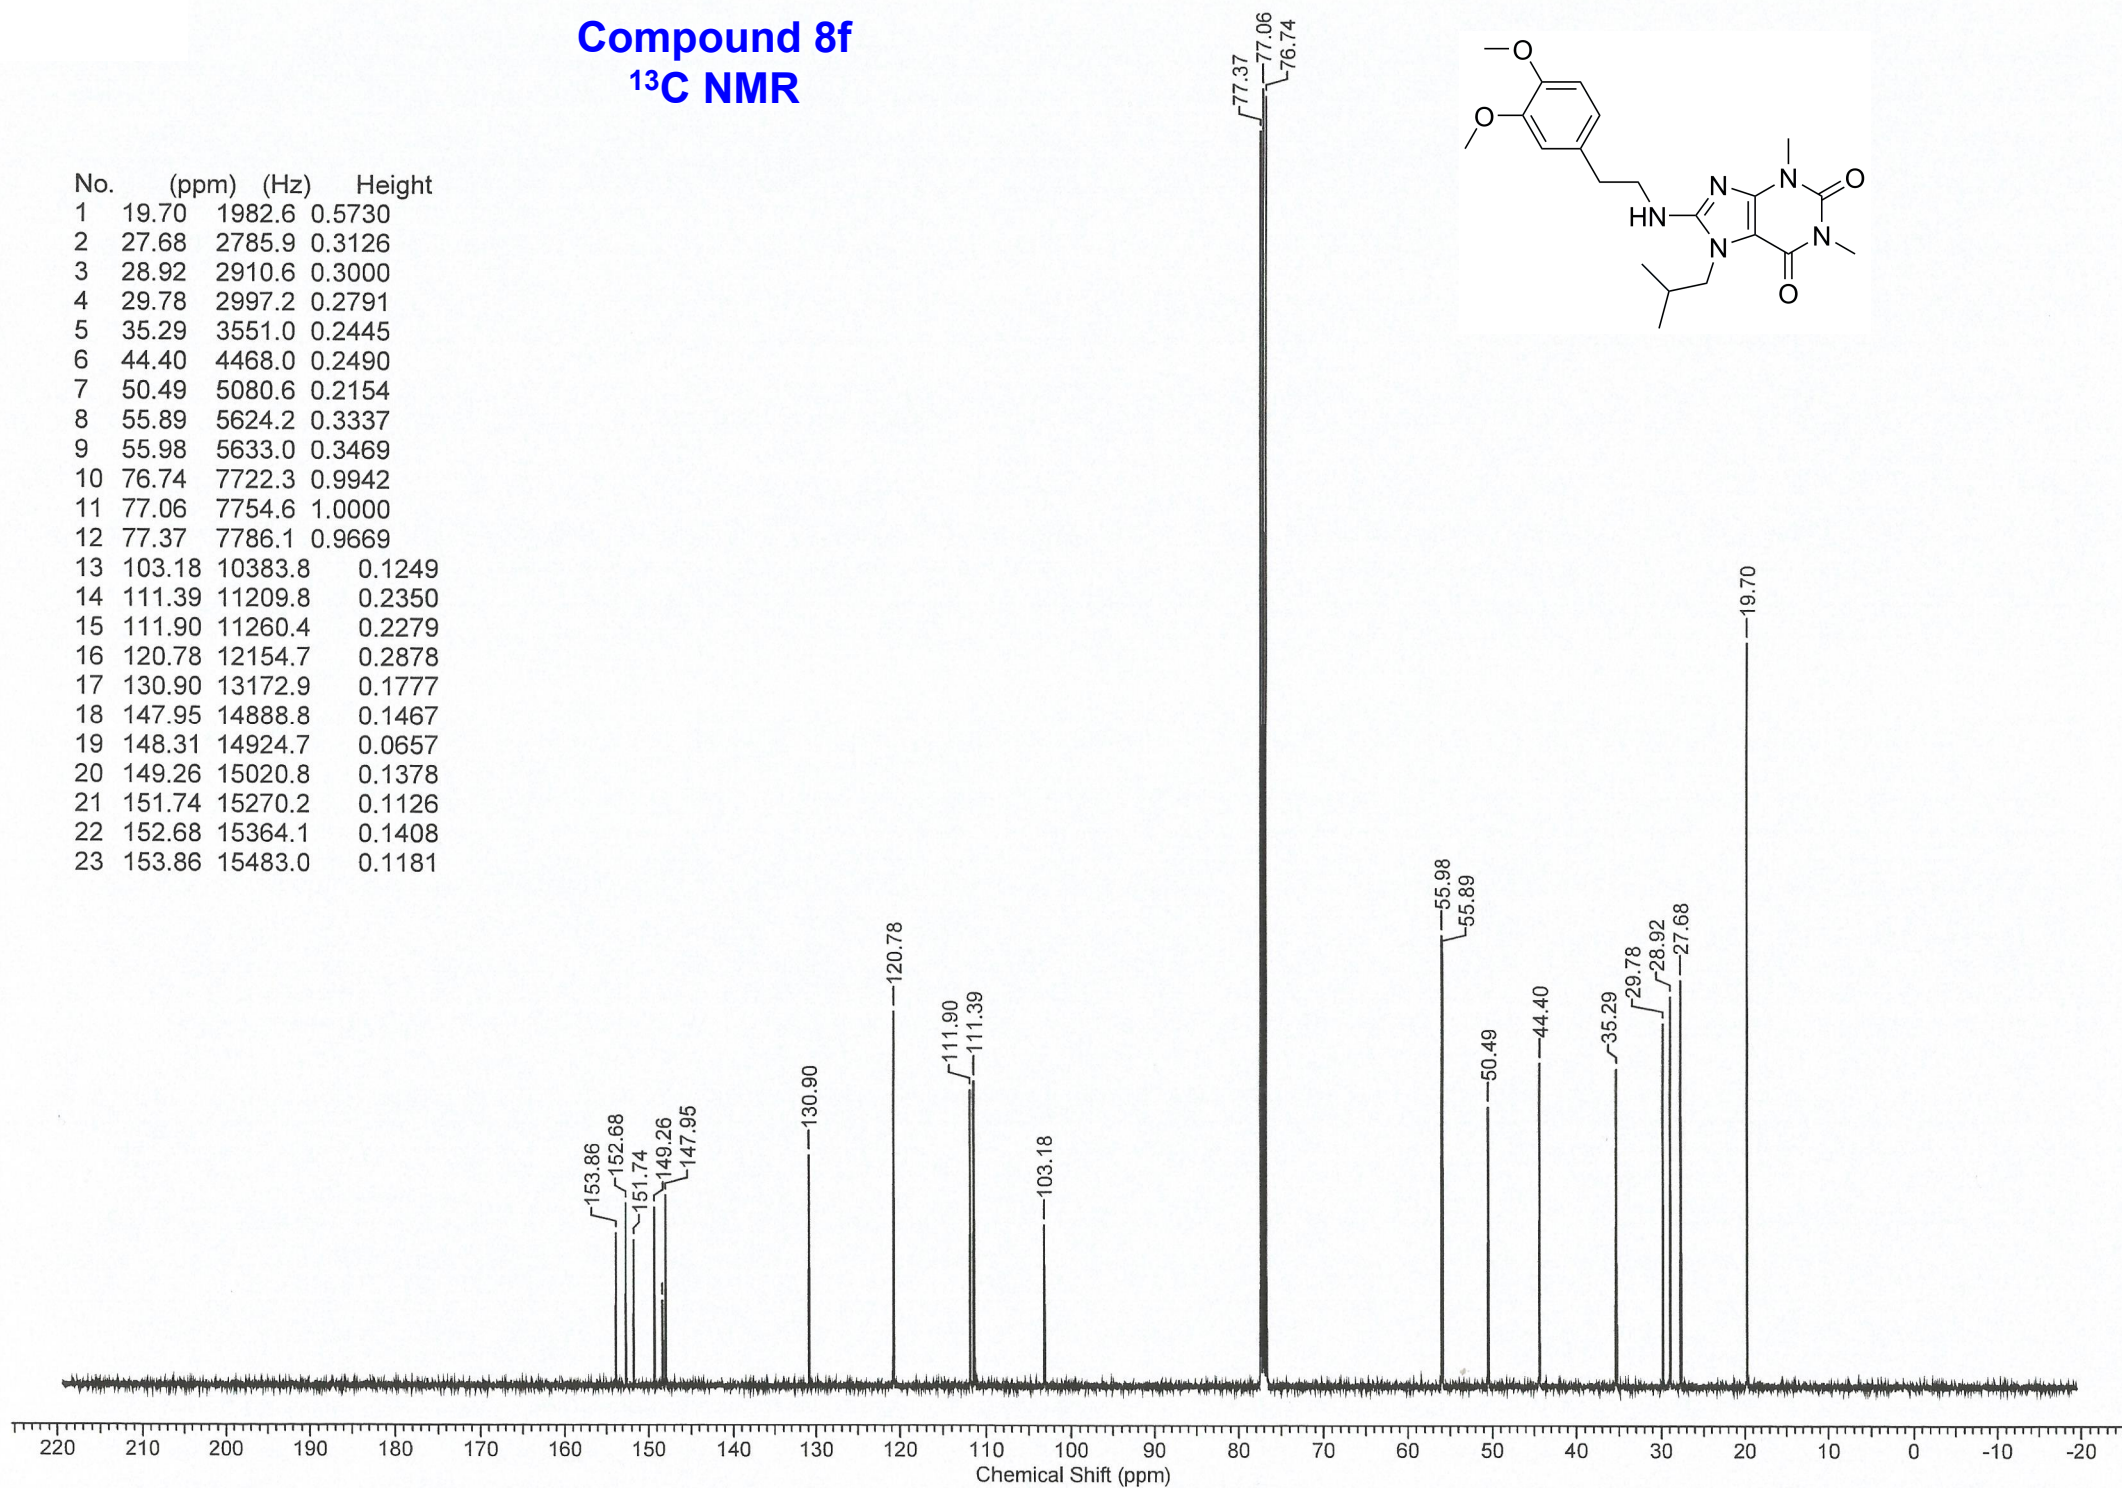

**Compound 8g**  
 **$^1\text{H}$  NMR - zoom of**  
**the aromatic region**

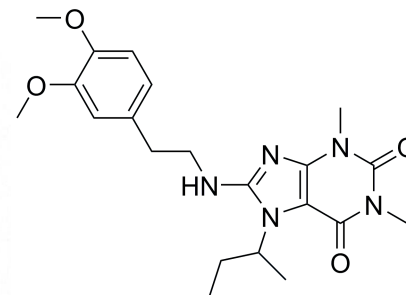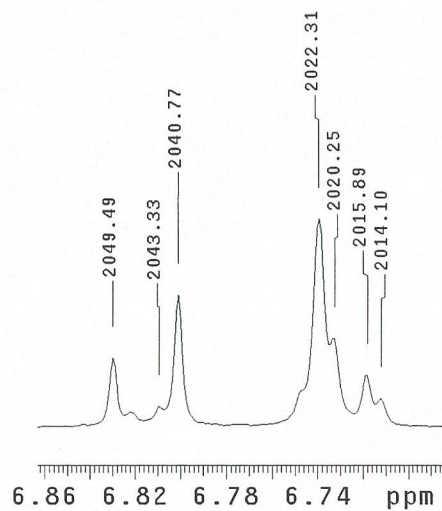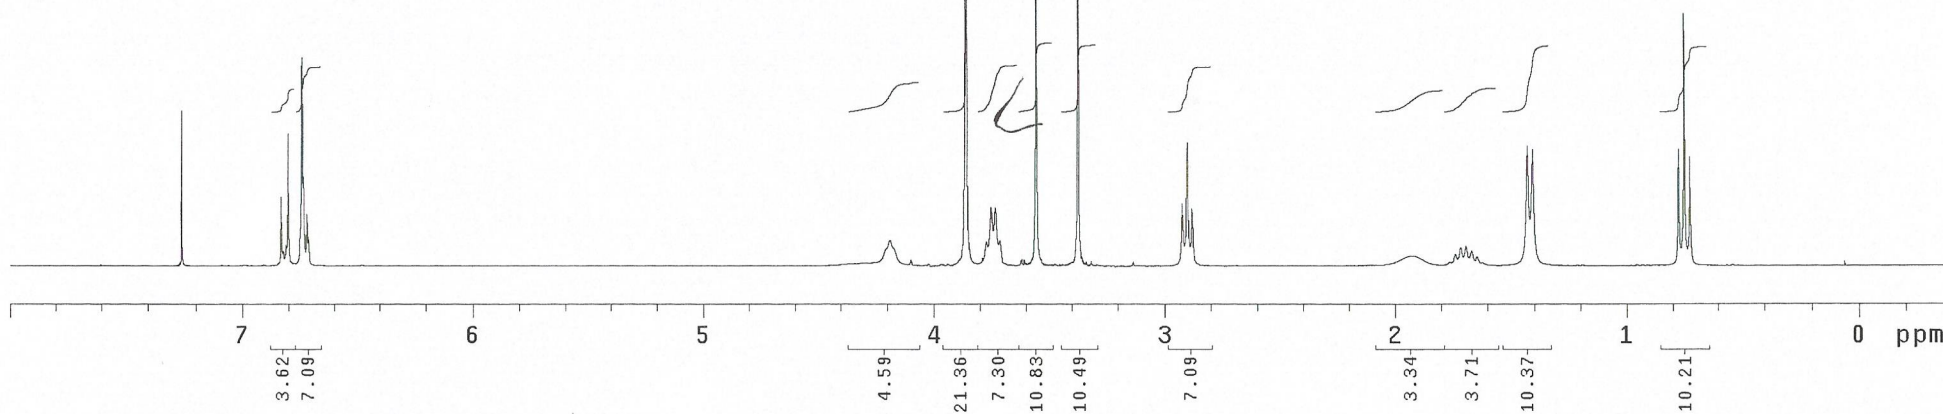

**Compound 8g**  
**<sup>1</sup>H NMR - zoom of the**  
**aliphatic region**

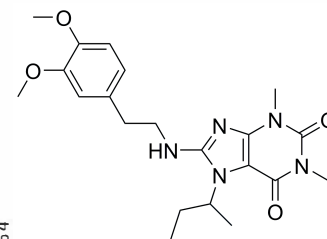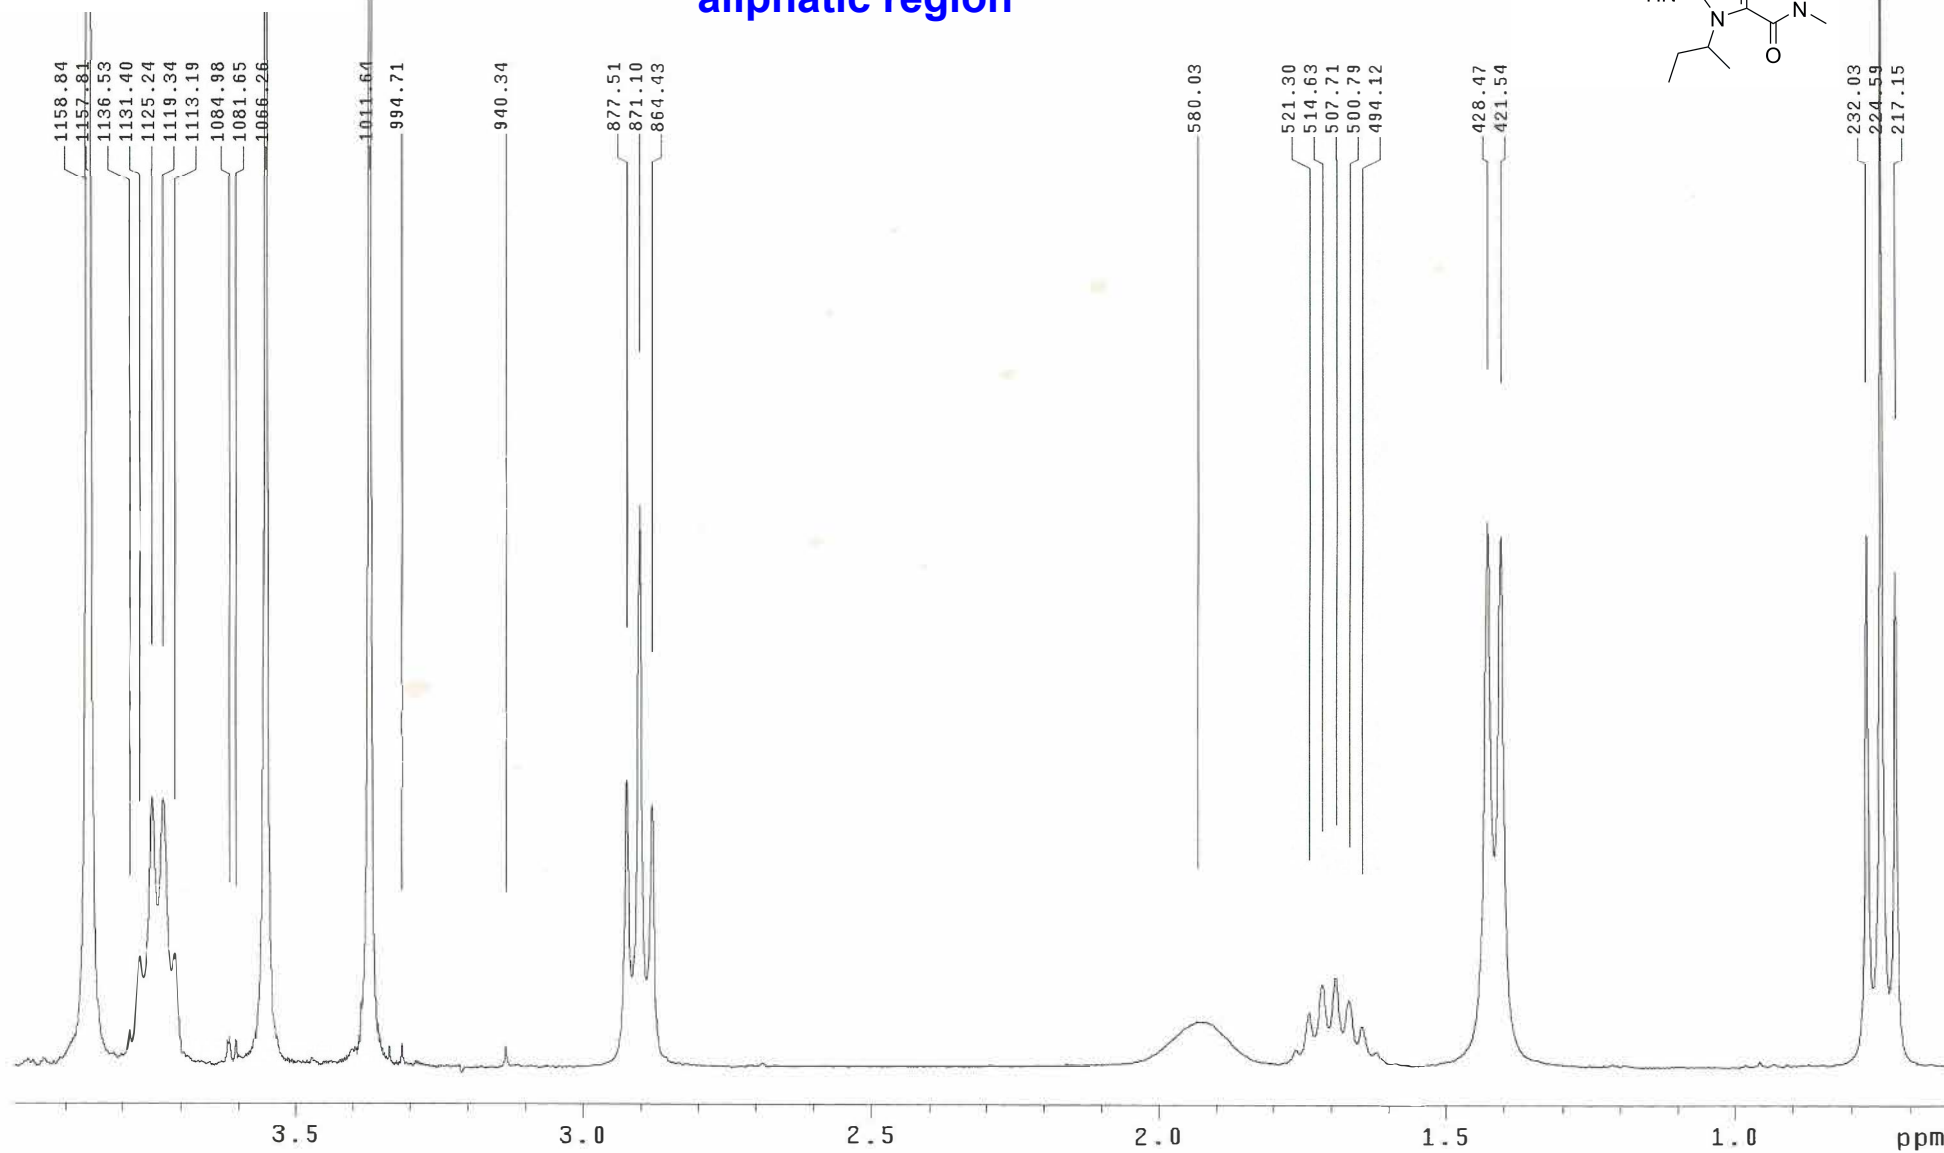

## Table of peaks

| INDEX | FREQUENCY | PPM   | HEIGHT |
|-------|-----------|-------|--------|
| 1     | 2177.971  | 7.258 | 20.1   |
| 2     | 2049.489  | 6.830 | 9.0    |
| 3     | 2043.334  | 6.809 | 2.7    |
| 4     | 2040.770  | 6.801 | 17.2   |
| 5     | 2022.305  | 6.739 | 27.1   |
| 6     | 2020.254  | 6.732 | 11.6   |
| 7     | 2015.894  | 6.718 | 6.7    |
| 8     | 2014.099  | 6.712 | 3.7    |
| 9     | 1257.058  | 4.189 | 3.3    |
| 10    | 1158.838  | 3.862 | 137.2  |
| 11    | 1157.812  | 3.858 | 144.0  |
| 12    | 1131.397  | 3.770 | 3.1    |
| 13    | 1125.243  | 3.750 | 7.6    |
| 14    | 1119.344  | 3.730 | 7.6    |
| 15    | 1113.189  | 3.710 | 3.2    |
| 16    | 1066.259  | 3.553 | 120.0  |
| 17    | 1011.635  | 3.371 | 123.7  |
| 18    | 877.512   | 2.924 | 8.1    |
| 19    | 871.100   | 2.903 | 16.0   |
| 20    | 864.433   | 2.881 | 7.4    |
| 21    | 507.710   | 1.692 | 2.5    |
| 22    | 428.467   | 1.428 | 15.6   |
| 23    | 421.543   | 1.405 | 15.1   |
| 24    | 232.026   | 0.773 | 15.2   |
| 25    | 224.589   | 0.748 | 32.7   |
| 26    | 217.152   | 0.724 | 14.1   |

# Compound 8g <sup>13</sup>C NMR

| No. | (ppm)  | (Hz)    | Height |
|-----|--------|---------|--------|
| 1   | 11.29  | 1136.1  | 0.2907 |
| 2   | 19.46  | 1958.4  | 0.0927 |
| 3   | 27.99  | 2816.7  | 0.2555 |
| 4   | 28.10  | 2827.7  | 0.1751 |
| 5   | 29.81  | 2999.4  | 0.2927 |
| 6   | 35.27  | 3549.6  | 0.2798 |
| 7   | 44.68  | 4496.7  | 0.2979 |
| 8   | 53.34  | 5368.2  | 0.0419 |
| 9   | 55.90  | 5624.9  | 0.3800 |
| 10  | 55.98  | 5633.0  | 0.4598 |
| 11  | 76.75  | 7723.7  | 0.9732 |
| 12  | 77.07  | 7755.3  | 1.0000 |
| 13  | 77.39  | 7787.6  | 0.9911 |
| 14  | 102.90 | 10355.1 | 0.1194 |
| 15  | 111.41 | 11211.3 | 0.3085 |
| 16  | 111.92 | 11262.6 | 0.2753 |
| 17  | 120.82 | 12158.3 | 0.3501 |
| 18  | 131.02 | 13184.6 | 0.1926 |
| 19  | 147.93 | 14886.6 | 0.1697 |
| 20  | 149.26 | 15020.1 | 0.2016 |
| 21  | 151.69 | 15265.1 | 0.1427 |
| 22  | 152.58 | 15354.6 | 0.1545 |
| 23  | 153.62 | 15459.5 | 0.0758 |

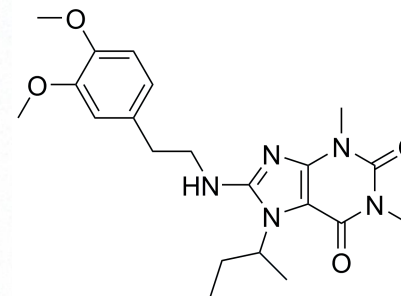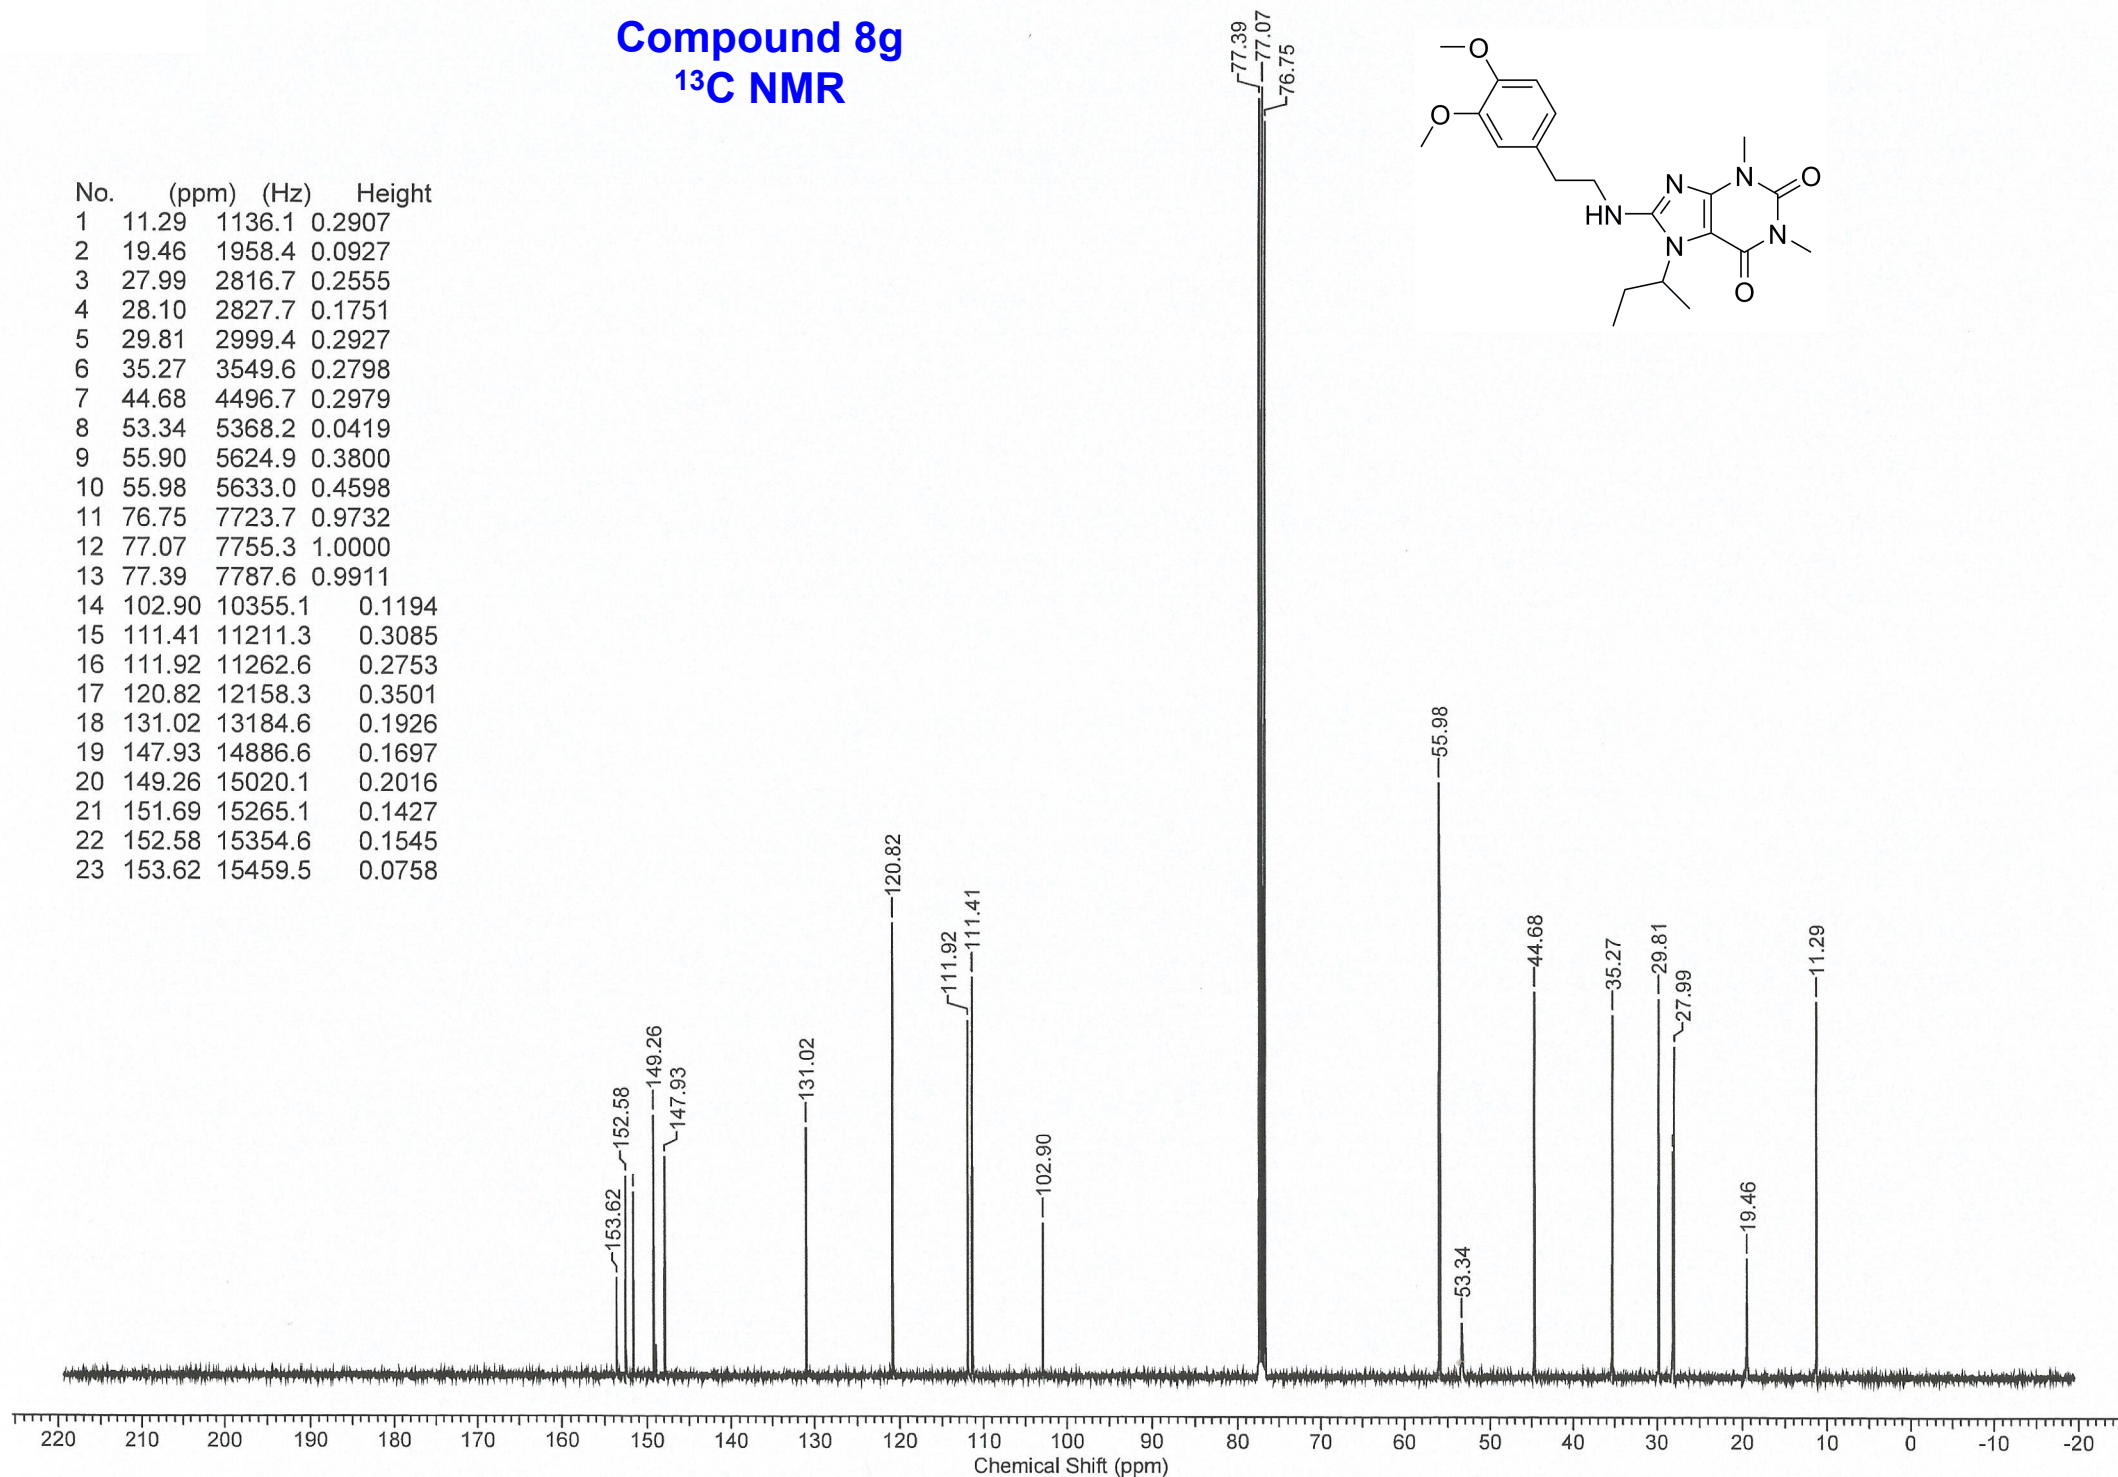

**Compound 8h**  
**<sup>1</sup>H NMR - zoom of**  
**the aromatic region**

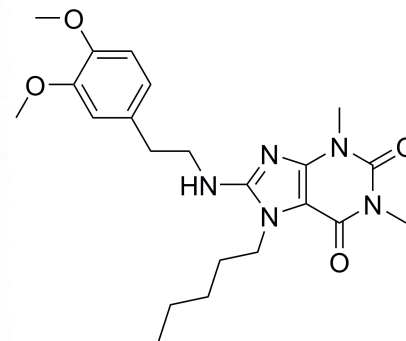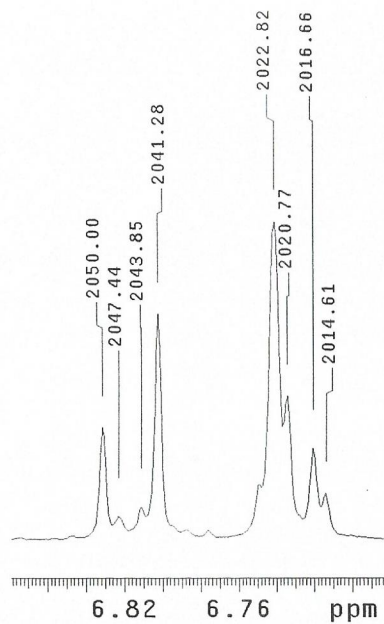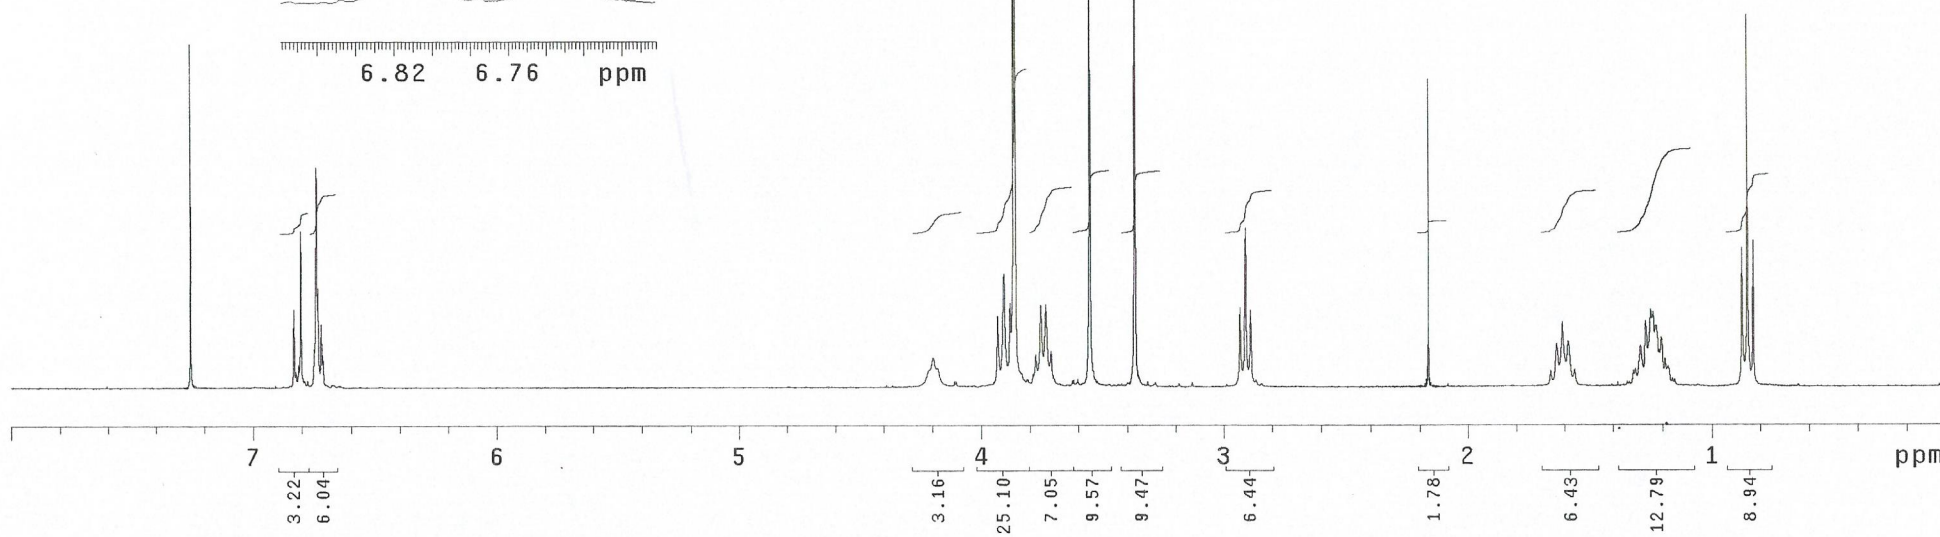

**Compound 8h**  
 **$^1\text{H}$  NMR - zoom of the**  
**aliphatic region**

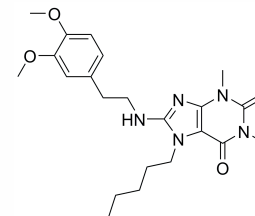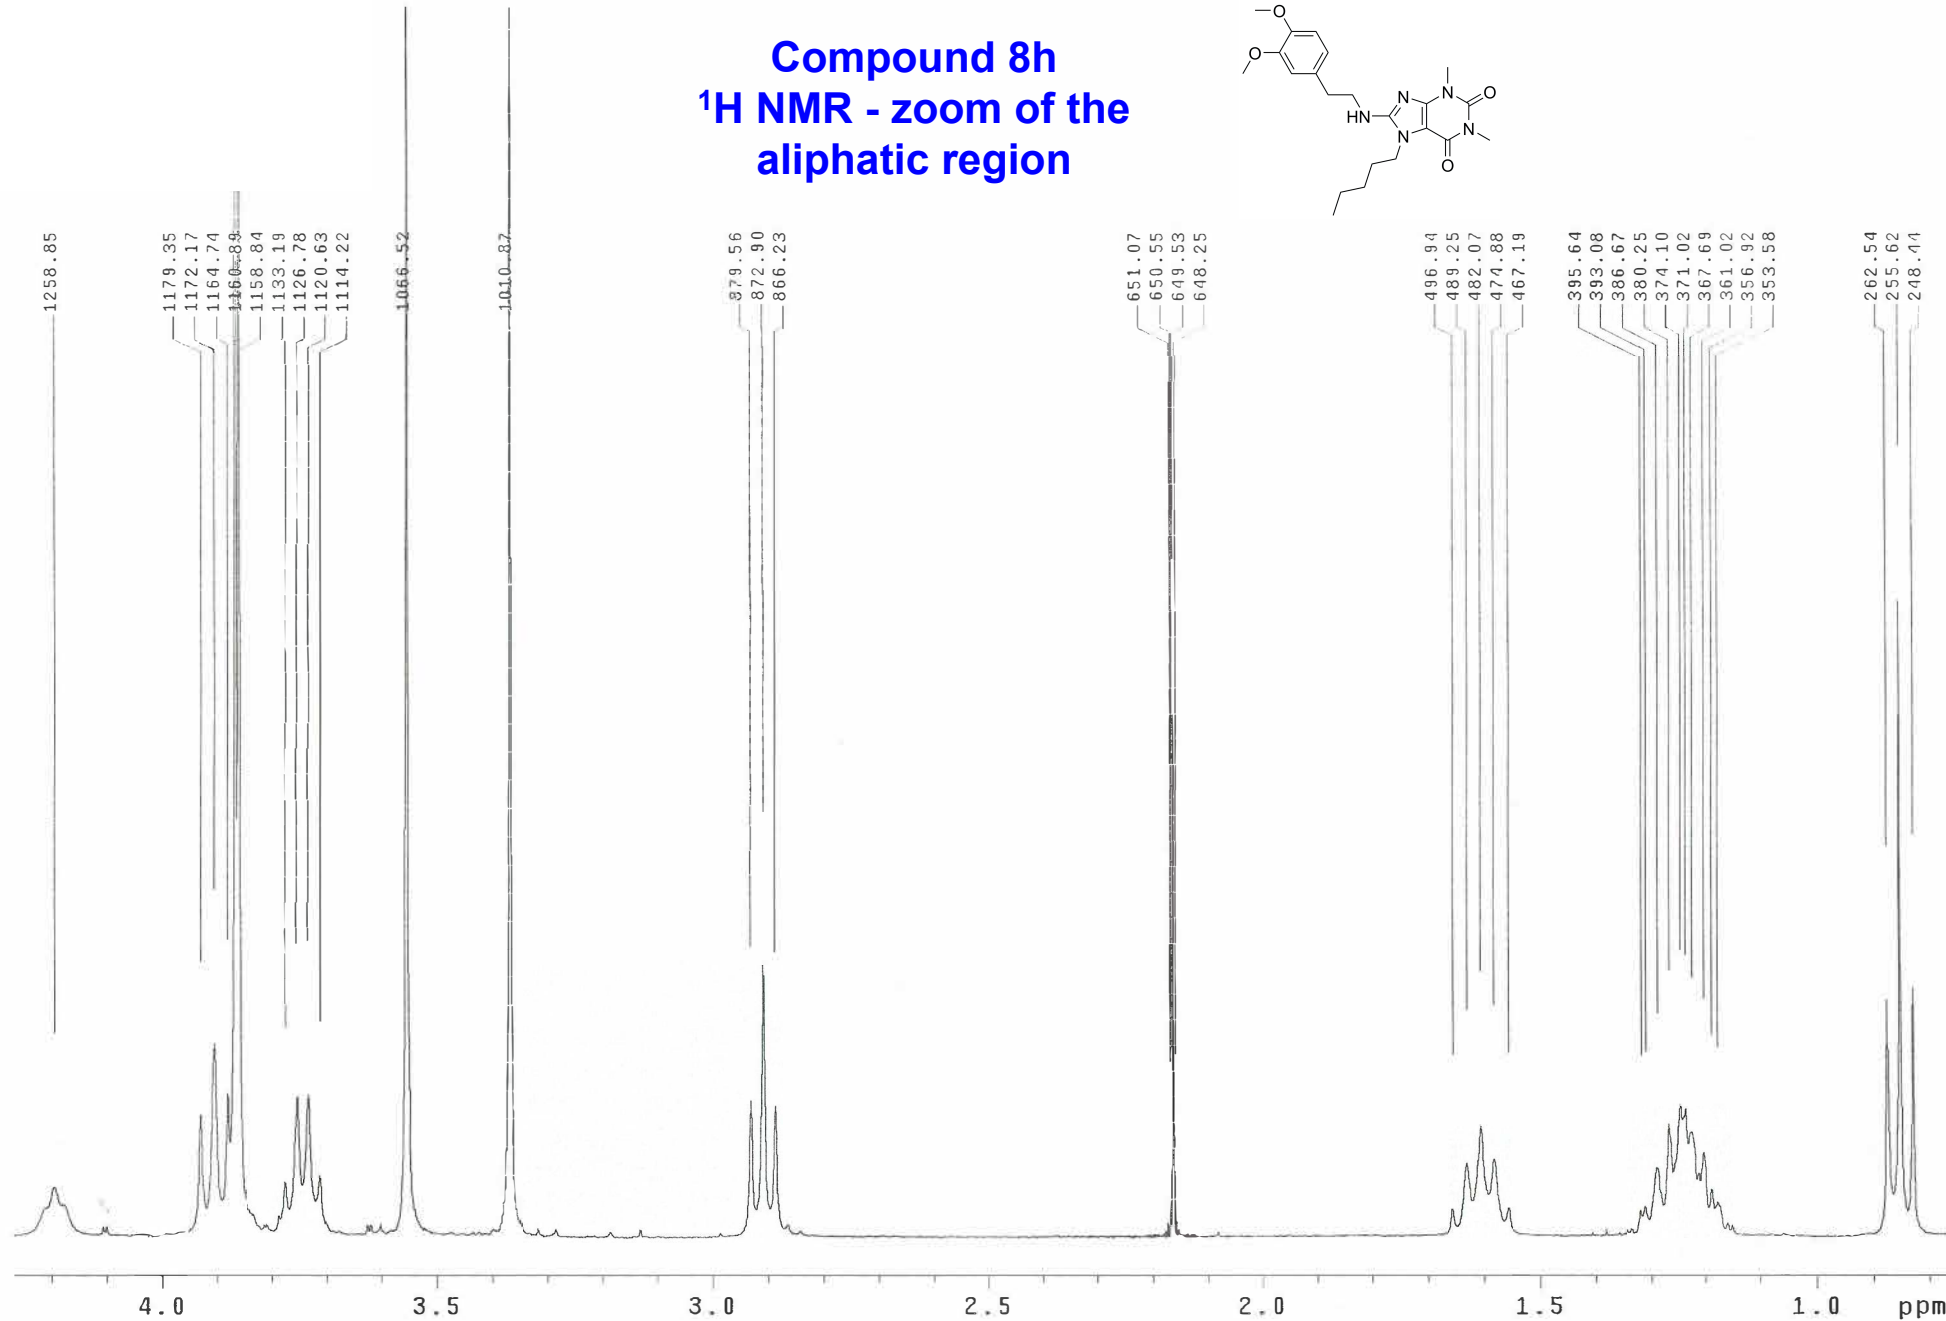

## Table of peaks

| INDEX | FREQUENCY | PPM   | HEIGHT | INDEX | FREQUENCY | PPM   | HEIGHT |
|-------|-----------|-------|--------|-------|-----------|-------|--------|
| 1     | 2177.971  | 7.258 | 44.7   | 40    | 255.620   | 0.852 | 48.4   |
| 2     | 2050.002  | 6.832 | 10.1   | 41    | 248.439   | 0.828 | 18.9   |
| 3     | 2043.847  | 6.811 | 3.0    |       |           |       |        |
| 4     | 2041.283  | 6.802 | 20.4   |       |           |       |        |
| 5     | 2025.126  | 6.749 | 5.0    |       |           |       |        |
| 6     | 2022.818  | 6.741 | 28.6   |       |           |       |        |
| 7     | 2020.767  | 6.734 | 12.9   |       |           |       |        |
| 8     | 2016.664  | 6.720 | 8.3    |       |           |       |        |
| 9     | 2014.612  | 6.714 | 4.2    |       |           |       |        |
| 10    | 1258.853  | 4.195 | 3.8    |       |           |       |        |
| 11    | 1179.354  | 3.930 | 9.2    |       |           |       |        |
| 12    | 1172.173  | 3.906 | 14.7   |       |           |       |        |
| 13    | 1164.736  | 3.881 | 10.9   |       |           |       |        |
| 14    | 1160.889  | 3.869 | 138.6  |       |           |       |        |
| 15    | 1158.838  | 3.862 | 144.0  |       |           |       |        |
| 16    | 1133.192  | 3.776 | 4.2    |       |           |       |        |
| 17    | 1126.781  | 3.755 | 10.6   |       |           |       |        |
| 18    | 1120.626  | 3.734 | 10.8   |       |           |       |        |
| 19    | 1114.215  | 3.713 | 4.7    |       |           |       |        |
| 20    | 1066.515  | 3.554 | 109.8  |       |           |       |        |
| 21    | 1010.866  | 3.369 | 132.5  |       |           |       |        |
| 22    | 879.563   | 2.931 | 10.3   |       |           |       |        |
| 23    | 872.896   | 2.909 | 20.7   |       |           |       |        |
| 24    | 866.228   | 2.887 | 10.0   |       |           |       |        |
| 25    | 650.553   | 2.168 | 2.6    |       |           |       |        |
| 26    | 649.527   | 2.165 | 39.9   |       |           |       |        |
| 27    | 489.246   | 1.630 | 5.6    |       |           |       |        |
| 28    | 482.065   | 1.606 | 8.5    |       |           |       |        |
| 29    | 474.885   | 1.583 | 5.9    |       |           |       |        |
| 30    | 386.666   | 1.289 | 5.3    |       |           |       |        |
| 31    | 380.255   | 1.267 | 8.6    |       |           |       |        |
| 32    | 374.100   | 1.247 | 10.0   |       |           |       |        |
| 33    | 371.022   | 1.236 | 9.7    |       |           |       |        |
| 34    | 367.689   | 1.225 | 8.0    |       |           |       |        |
| 35    | 363.842   | 1.212 | 4.9    |       |           |       |        |
| 36    | 361.021   | 1.203 | 6.4    |       |           |       |        |
| 37    | 356.918   | 1.189 | 3.7    |       |           |       |        |
| 38    | 353.584   | 1.178 | 2.7    |       |           |       |        |
| 39    | 262.544   | 0.875 | 18.0   |       |           |       |        |

**Compound 8h**  
**<sup>13</sup>C NMR**

| No. | (ppm)  | (Hz)    | Height |
|-----|--------|---------|--------|
| 1   | 13.88  | 1397.2  | 0.2319 |
| 2   | 22.29  | 2243.0  | 0.2676 |
| 3   | 27.68  | 2785.9  | 0.2164 |
| 4   | 28.62  | 2880.5  | 0.2672 |
| 5   | 29.20  | 2938.5  | 0.2034 |
| 6   | 29.78  | 2997.2  | 0.1864 |
| 7   | 35.29  | 3551.8  | 0.1858 |
| 8   | 43.36  | 4363.9  | 0.1494 |
| 9   | 44.36  | 4464.4  | 0.1727 |
| 10  | 55.89  | 5624.2  | 0.2573 |
| 11  | 55.92  | 5627.1  | 0.2707 |
| 12  | 76.74  | 7722.3  | 0.9309 |
| 13  | 77.05  | 7753.8  | 1.0000 |
| 14  | 77.37  | 7786.1  | 0.9626 |
| 15  | 102.84 | 10349.3 | 0.1036 |
| 16  | 111.33 | 11203.9 | 0.1703 |
| 17  | 111.85 | 11256.0 | 0.1777 |
| 18  | 120.76 | 12152.5 | 0.2267 |
| 19  | 130.89 | 13171.4 | 0.1245 |
| 20  | 147.94 | 14887.3 | 0.1238 |
| 21  | 148.34 | 14928.4 | 0.0422 |
| 22  | 149.26 | 15020.8 | 0.1414 |
| 23  | 151.75 | 15271.0 | 0.1062 |
| 24  | 152.38 | 15334.8 | 0.0951 |
| 25  | 153.89 | 15486.7 | 0.1168 |

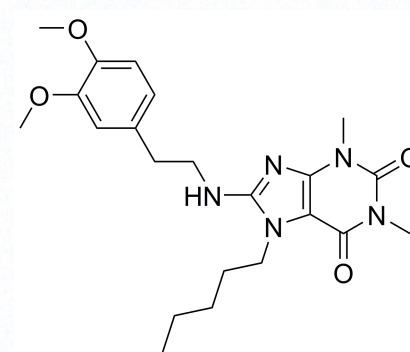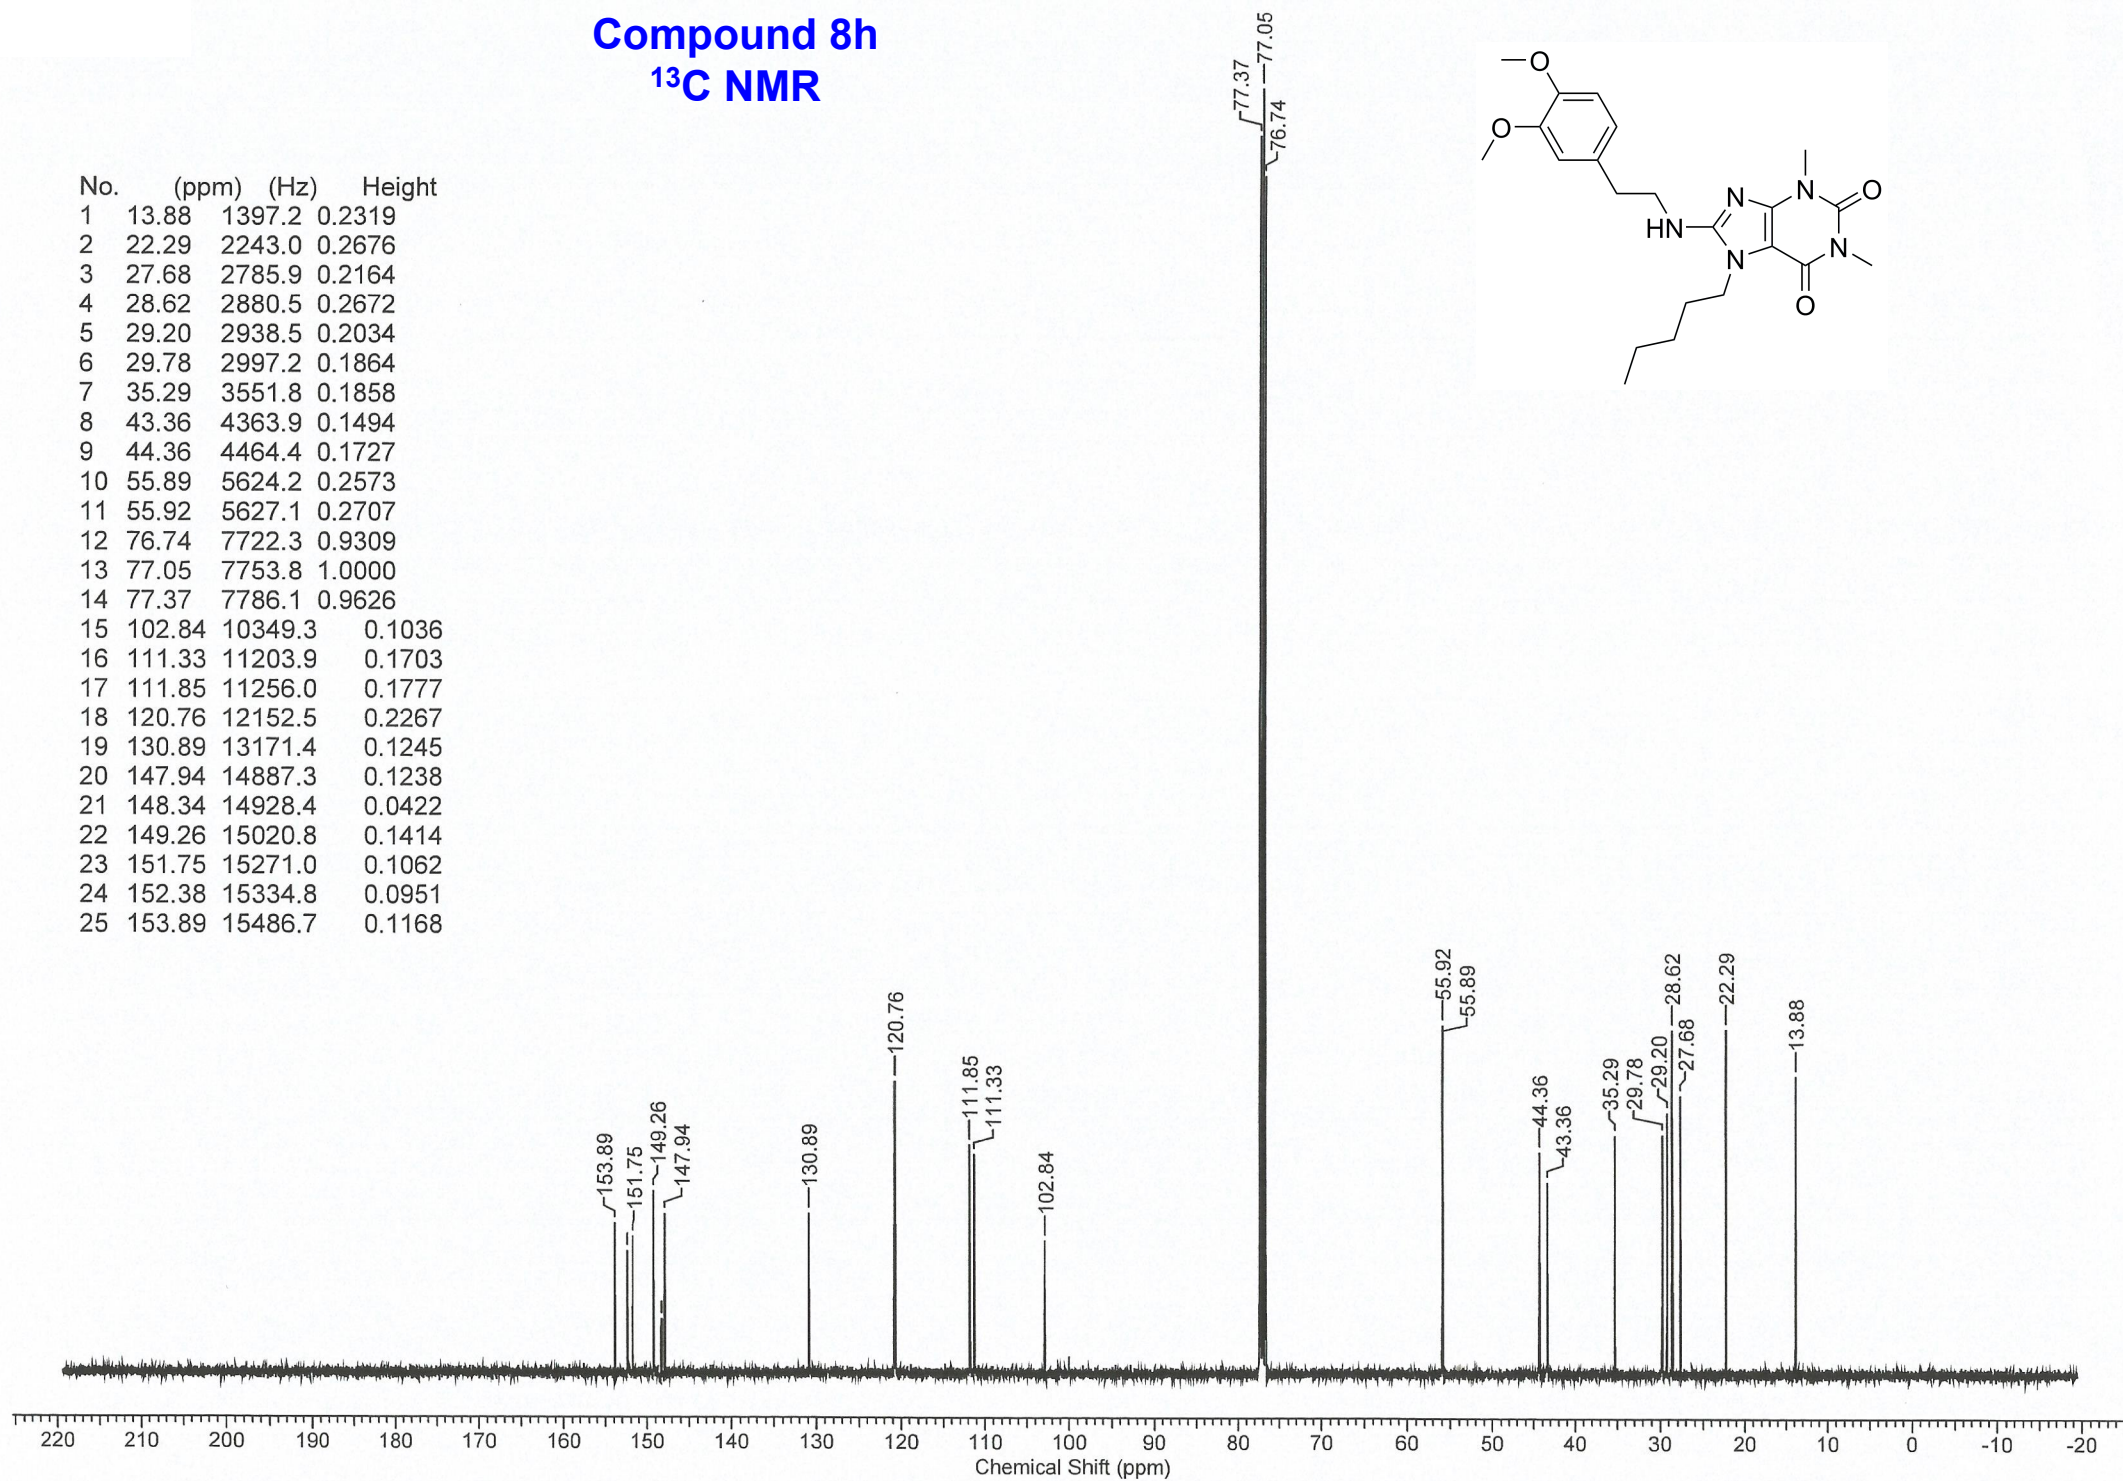

**Compound 8i**  
**<sup>1</sup>H NMR**

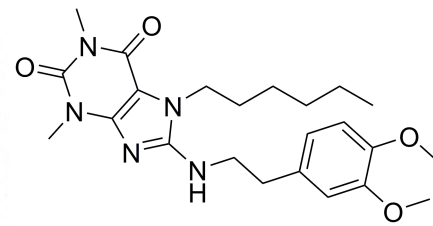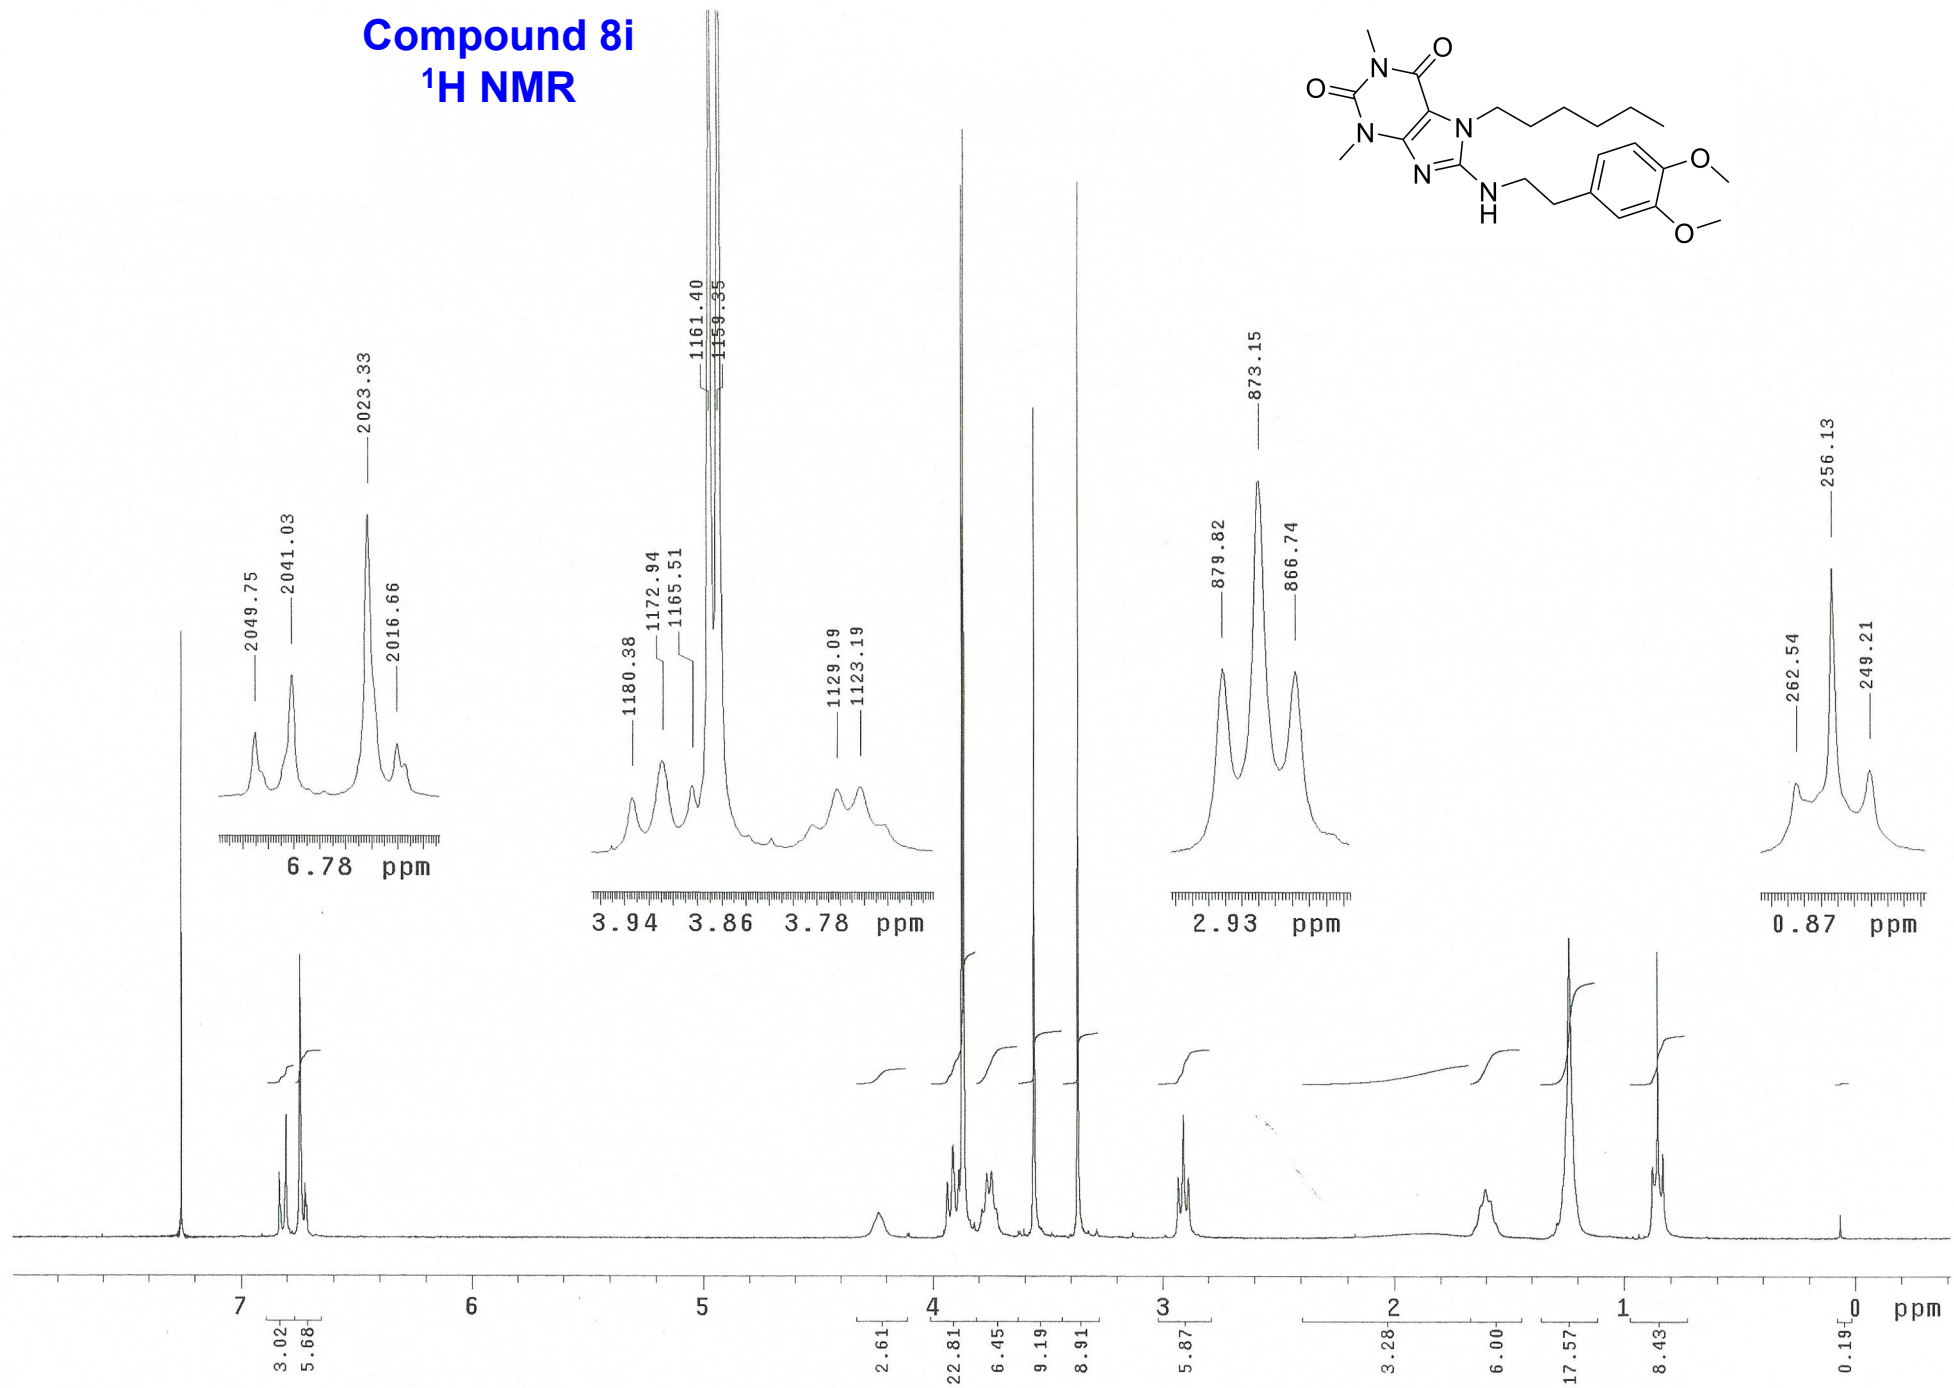

## Table of peaks

| INDEX | FREQUENCY | PPM   | HEIGHT |
|-------|-----------|-------|--------|
| 1     | 2179.253  | 7.262 | 3.6    |
| 2     | 2178.227  | 7.259 | 78.8   |
| 3     | 2049.746  | 6.831 | 8.4    |
| 4     | 2041.026  | 6.802 | 15.9   |
| 5     | 2023.331  | 6.743 | 36.7   |
| 6     | 2016.664  | 6.720 | 7.1    |
| 7     | 2014.868  | 6.714 | 4.4    |
| 8     | 1270.650  | 4.234 | 3.3    |
| 9     | 1180.379  | 3.934 | 7.3    |
| 10    | 1172.942  | 3.909 | 12.1   |
| 11    | 1165.505  | 3.884 | 8.9    |
| 12    | 1161.402  | 3.870 | 136.7  |
| 13    | 1159.350  | 3.863 | 144.0  |
| 14    | 1135.244  | 3.783 | 3.8    |
| 15    | 1129.089  | 3.763 | 8.4    |
| 16    | 1123.191  | 3.743 | 8.7    |
| 17    | 1068.567  | 3.561 | 108.0  |
| 18    | 1011.122  | 3.370 | 137.2  |
| 19    | 879.820   | 2.932 | 7.9    |
| 20    | 873.152   | 2.910 | 16.0   |
| 21    | 866.741   | 2.888 | 7.8    |
| 22    | 480.783   | 1.602 | 6.3    |
| 23    | 370.766   | 1.236 | 39.0   |
| 24    | 262.544   | 0.875 | 9.3    |
| 25    | 256.133   | 0.854 | 37.2   |
| 26    | 249.209   | 0.830 | 11.0   |
| 27    | 19.173    | 0.064 | 3.1    |

# Compound 8i

## <sup>13</sup>C NMR

| No. | (ppm)  | (Hz)    | Height |
|-----|--------|---------|--------|
| 1   | 13.96  | 1405.3  | 0.1855 |
| 2   | 22.49  | 2262.9  | 0.1914 |
| 3   | 26.24  | 2640.7  | 0.1448 |
| 4   | 27.70  | 2787.4  | 0.1573 |
| 5   | 29.47  | 2965.6  | 0.1190 |
| 6   | 29.85  | 3003.8  | 0.1035 |
| 7   | 31.35  | 3154.9  | 0.1711 |
| 8   | 35.31  | 3553.2  | 0.1116 |
| 9   | 43.44  | 4371.2  | 0.0957 |
| 10  | 44.40  | 4468.0  | 0.1184 |
| 11  | 55.90  | 5624.9  | 0.1894 |
| 12  | 55.91  | 5626.4  | 0.1595 |
| 13  | 76.72  | 7720.8  | 0.9441 |
| 14  | 77.04  | 7752.4  | 1.0000 |
| 15  | 77.36  | 7784.6  | 0.9585 |
| 16  | 102.83 | 10347.8 | 0.0612 |
| 17  | 111.32 | 11202.5 | 0.1158 |
| 18  | 111.86 | 11256.7 | 0.1222 |
| 19  | 120.75 | 12151.7 | 0.1477 |
| 20  | 130.86 | 13168.5 | 0.0862 |
| 21  | 147.95 | 14888.8 | 0.0727 |
| 22  | 149.28 | 15022.3 | 0.0835 |
| 23  | 151.73 | 15268.8 | 0.0726 |
| 24  | 152.27 | 15323.1 | 0.0574 |
| 25  | 153.89 | 15486.7 | 0.0742 |

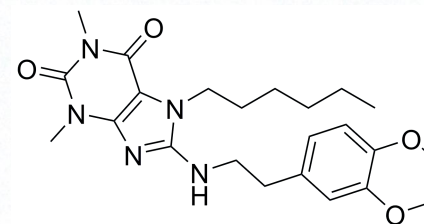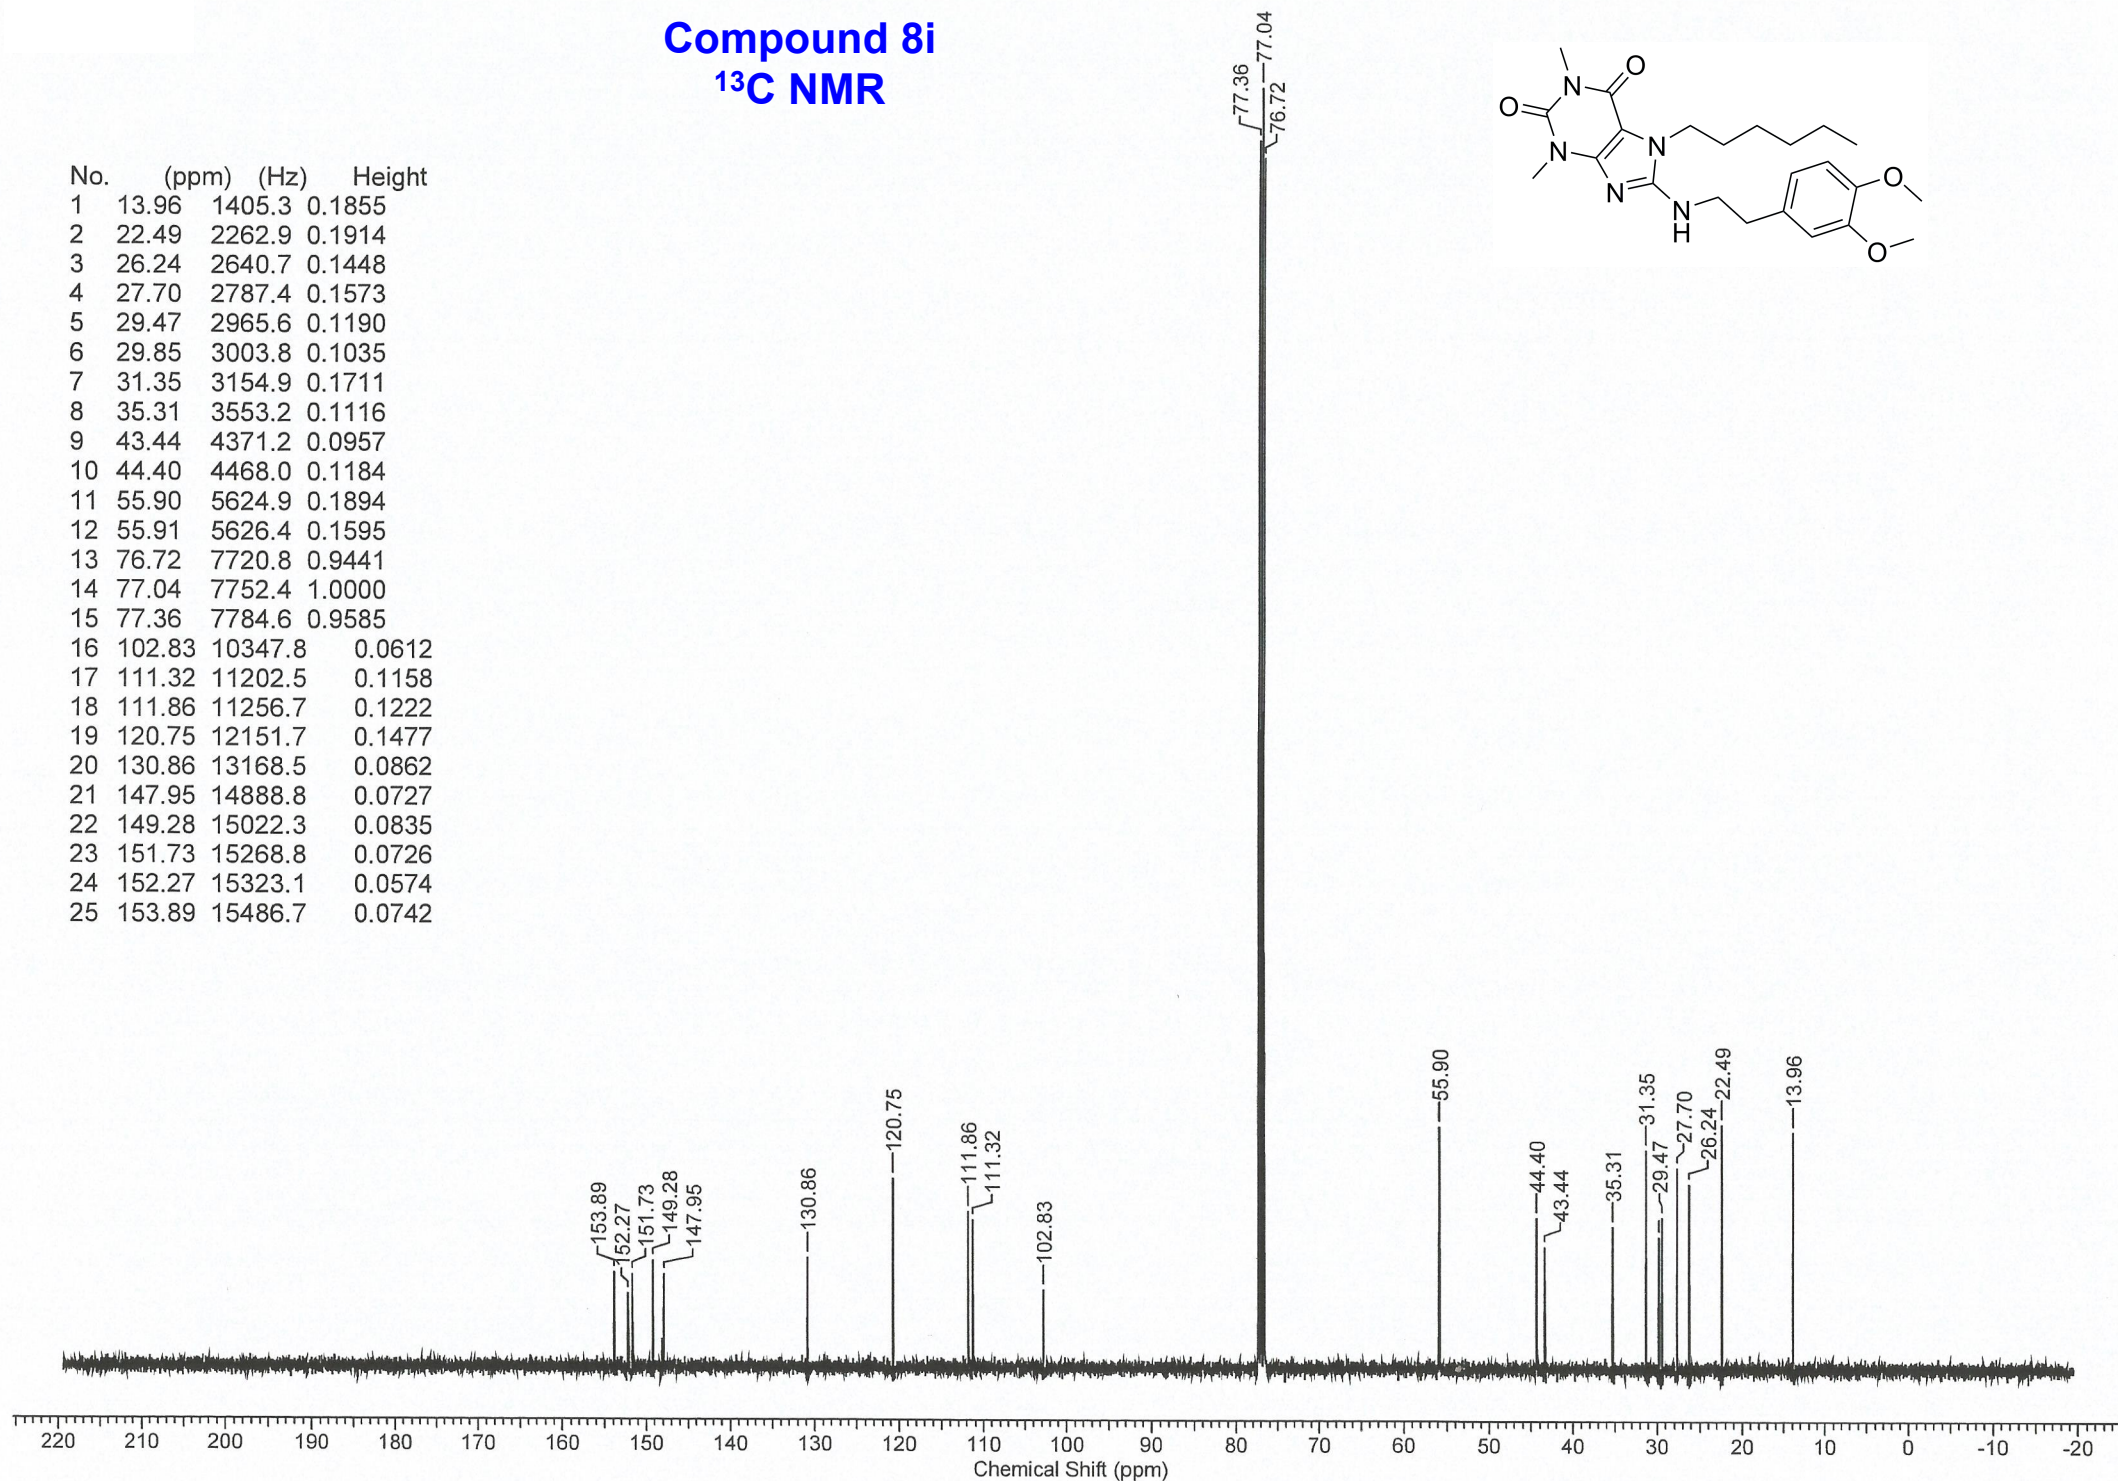

**Compound 8j**  
**<sup>1</sup>H NMR**

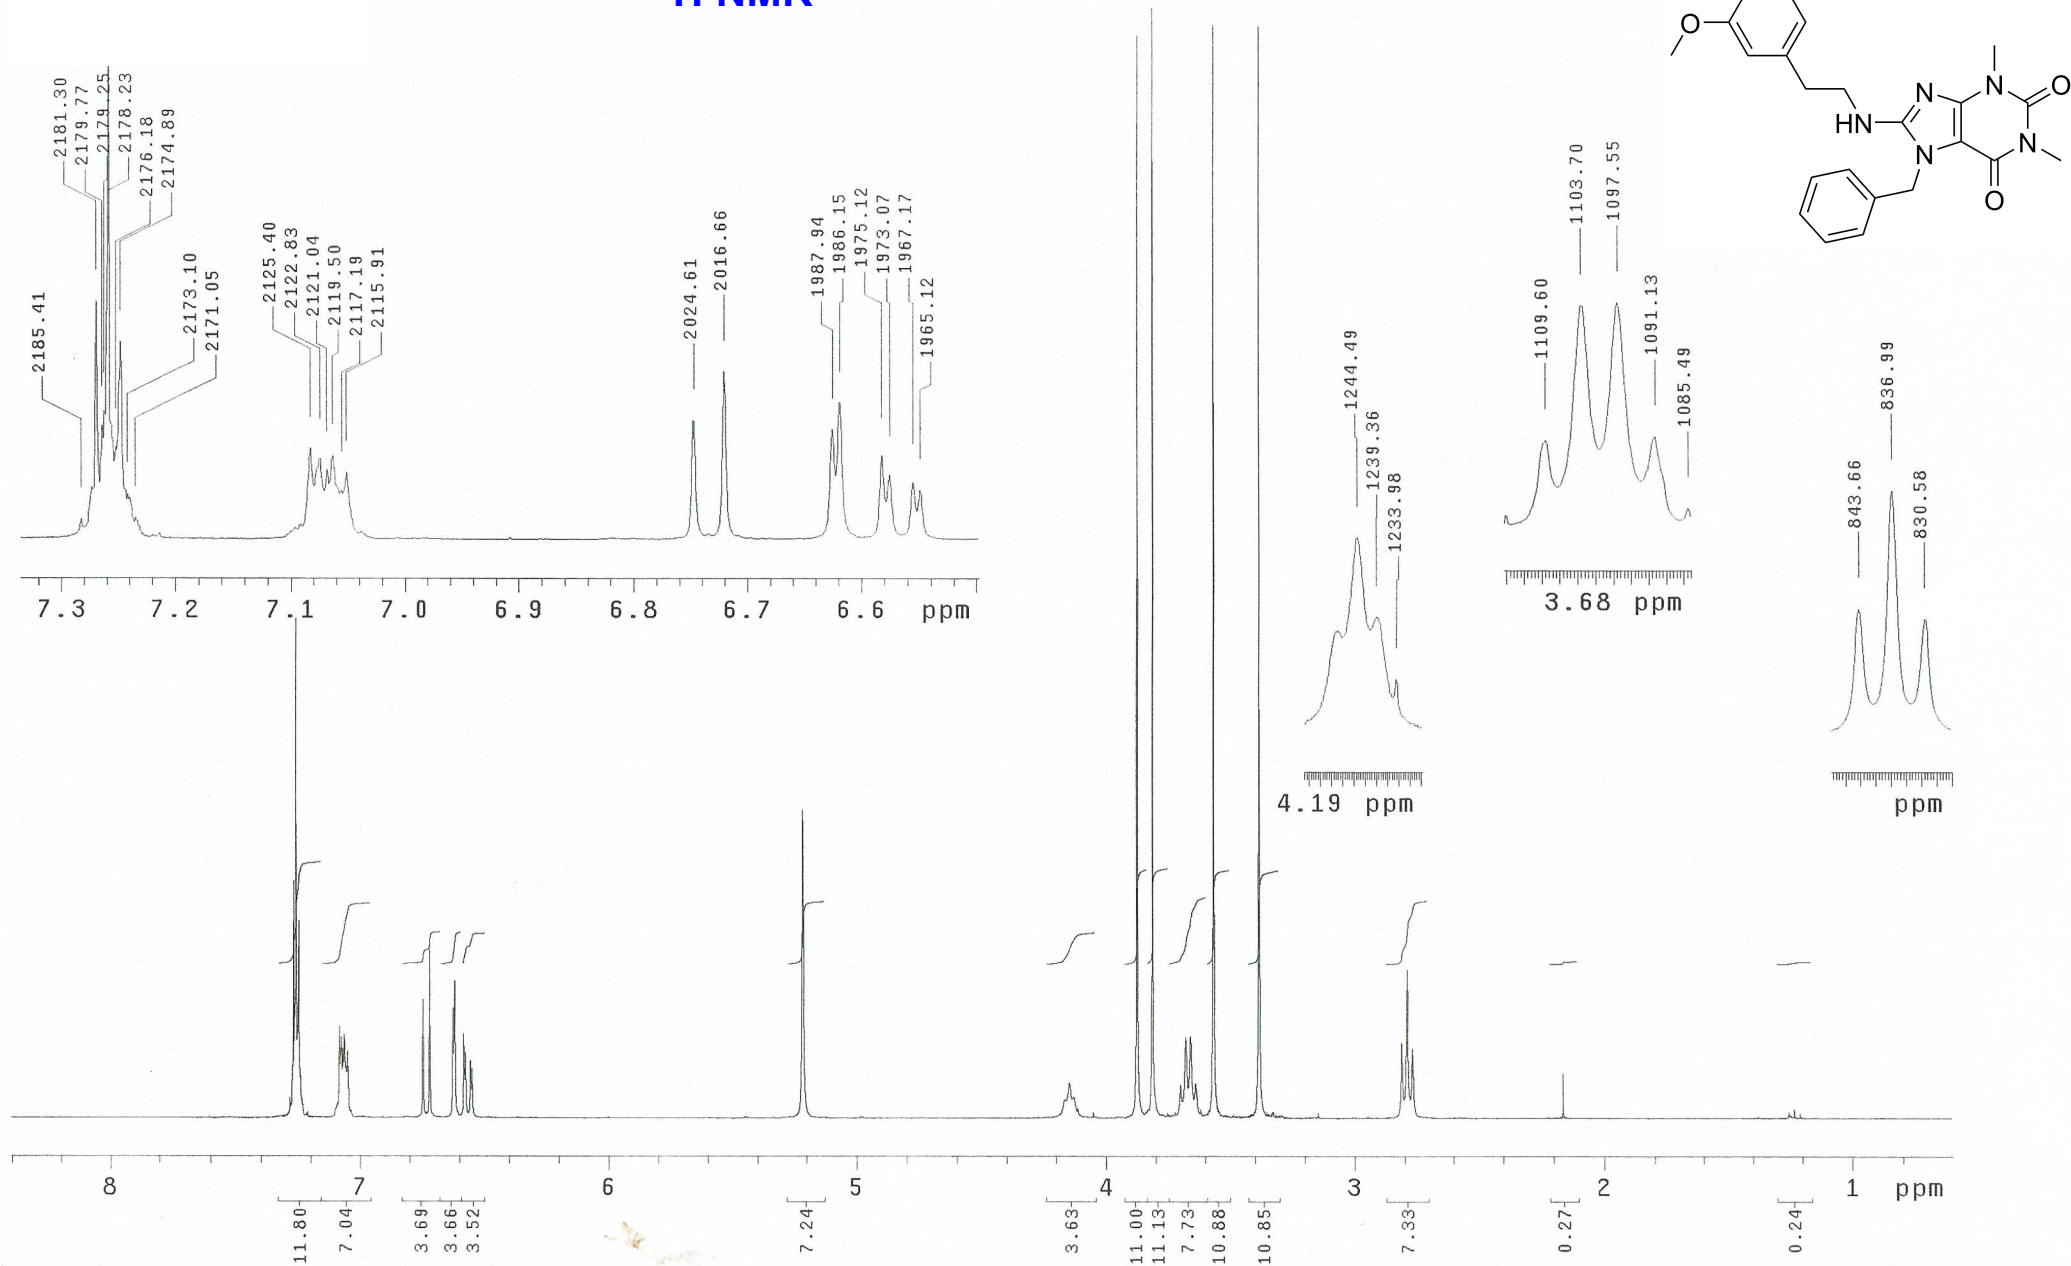

# Table of peaks

| INDEX | FREQUENCY | PPM   | HEIGHT | INDEX | FREQUENCY | PPM   | HEIGHT |
|-------|-----------|-------|--------|-------|-----------|-------|--------|
| 1     | 2185.408  | 7.283 | 2.6    | 40    | 830.581   | 2.768 | 9.1    |
| 2     | 2182.587  | 7.273 | 6.8    | 41    | 648.758   | 2.162 | 5.8    |
| 3     | 2181.305  | 7.269 | 30.7   |       |           |       |        |
| 4     | 2179.766  | 7.264 | 14.8   |       |           |       |        |
| 5     | 2179.253  | 7.262 | 16.6   |       |           |       |        |
| 6     | 2178.227  | 7.259 | 64.9   |       |           |       |        |
| 7     | 2176.176  | 7.252 | 11.9   |       |           |       |        |
| 8     | 2174.893  | 7.248 | 25.5   |       |           |       |        |
| 9     | 2173.098  | 7.242 | 5.8    |       |           |       |        |
| 10    | 2172.585  | 7.240 | 5.4    |       |           |       |        |
| 11    | 2171.047  | 7.235 | 2.8    |       |           |       |        |
| 12    | 2125.398  | 7.083 | 11.9   |       |           |       |        |
| 13    | 2122.834  | 7.074 | 10.5   |       |           |       |        |
| 14    | 2121.039  | 7.068 | 9.1    |       |           |       |        |
| 15    | 2119.500  | 7.063 | 10.9   |       |           |       |        |
| 16    | 2117.192  | 7.055 | 6.4    |       |           |       |        |
| 17    | 2115.910  | 7.051 | 8.7    |       |           |       |        |
| 18    | 2024.614  | 6.747 | 15.4   |       |           |       |        |
| 19    | 2016.664  | 6.720 | 21.7   |       |           |       |        |
| 20    | 1987.941  | 6.625 | 14.3   |       |           |       |        |
| 21    | 1986.146  | 6.619 | 17.8   |       |           |       |        |
| 22    | 1975.119  | 6.582 | 10.9   |       |           |       |        |
| 23    | 1973.067  | 6.575 | 8.4    |       |           |       |        |
| 24    | 1967.169  | 6.556 | 7.5    |       |           |       |        |
| 25    | 1965.117  | 6.549 | 6.5    |       |           |       |        |
| 26    | 1565.311  | 5.216 | 39.9   |       |           |       |        |
| 27    | 1244.492  | 4.147 | 4.6    |       |           |       |        |
| 28    | 1239.363  | 4.130 | 2.7    |       |           |       |        |
| 29    | 1162.428  | 3.874 | 140.5  |       |           |       |        |
| 30    | 1143.963  | 3.812 | 144.0  |       |           |       |        |
| 31    | 1109.599  | 3.698 | 4.3    |       |           |       |        |
| 32    | 1103.701  | 3.678 | 10.5   |       |           |       |        |
| 33    | 1097.546  | 3.658 | 10.7   |       |           |       |        |
| 34    | 1091.135  | 3.636 | 4.5    |       |           |       |        |
| 35    | 1070.106  | 3.566 | 141.8  |       |           |       |        |
| 36    | 1018.046  | 3.393 | 2.7    |       |           |       |        |
| 37    | 1015.482  | 3.384 | 141.6  |       |           |       |        |
| 38    | 843.660   | 2.811 | 9.9    |       |           |       |        |
| 39    | 836.992   | 2.789 | 19.2   |       |           |       |        |

# Compound 8j

## <sup>13</sup>C NMR

| No. | (ppm)  | (Hz)    | Height |
|-----|--------|---------|--------|
| 1   | 27.65  | 2086.4  | 0.0653 |
| 2   | 27.69  | 2089.7  | 0.0718 |
| 3   | 29.72  | 2242.9  | 0.0636 |
| 4   | 29.77  | 2246.2  | 0.0681 |
| 5   | 35.08  | 2647.0  | 0.2615 |
| 6   | 44.09  | 3327.1  | 0.1574 |
| 7   | 46.63  | 3518.9  | 0.1583 |
| 8   | 55.80  | 4210.5  | 0.1212 |
| 9   | 55.83  | 4213.3  | 0.1186 |
| 10  | 55.90  | 4218.3  | 0.1186 |
| 11  | 55.94  | 4221.0  | 0.1104 |
| 12  | 76.60  | 5780.7  | 1.0000 |
| 13  | 77.02  | 5812.2  | 0.9948 |
| 14  | 77.45  | 5844.3  | 0.9837 |
| 15  | 102.91 | 7765.5  | 0.1312 |
| 16  | 111.34 | 8401.9  | 0.3330 |
| 17  | 111.65 | 8425.6  | 0.2482 |
| 18  | 120.64 | 9104.0  | 0.2447 |
| 19  | 127.00 | 9583.9  | 0.5135 |
| 20  | 128.14 | 9669.6  | 0.2126 |
| 21  | 129.05 | 9738.2  | 0.4411 |
| 22  | 130.57 | 9853.2  | 0.2627 |
| 23  | 135.10 | 10194.8 | 0.2502 |
| 24  | 147.87 | 11158.5 | 0.1797 |
| 25  | 148.45 | 11202.2 | 0.1063 |
| 26  | 149.21 | 11259.7 | 0.2112 |
| 27  | 151.71 | 11448.2 | 0.1288 |
| 28  | 153.06 | 11550.5 | 0.2353 |
| 29  | 154.15 | 11632.8 | 0.1612 |

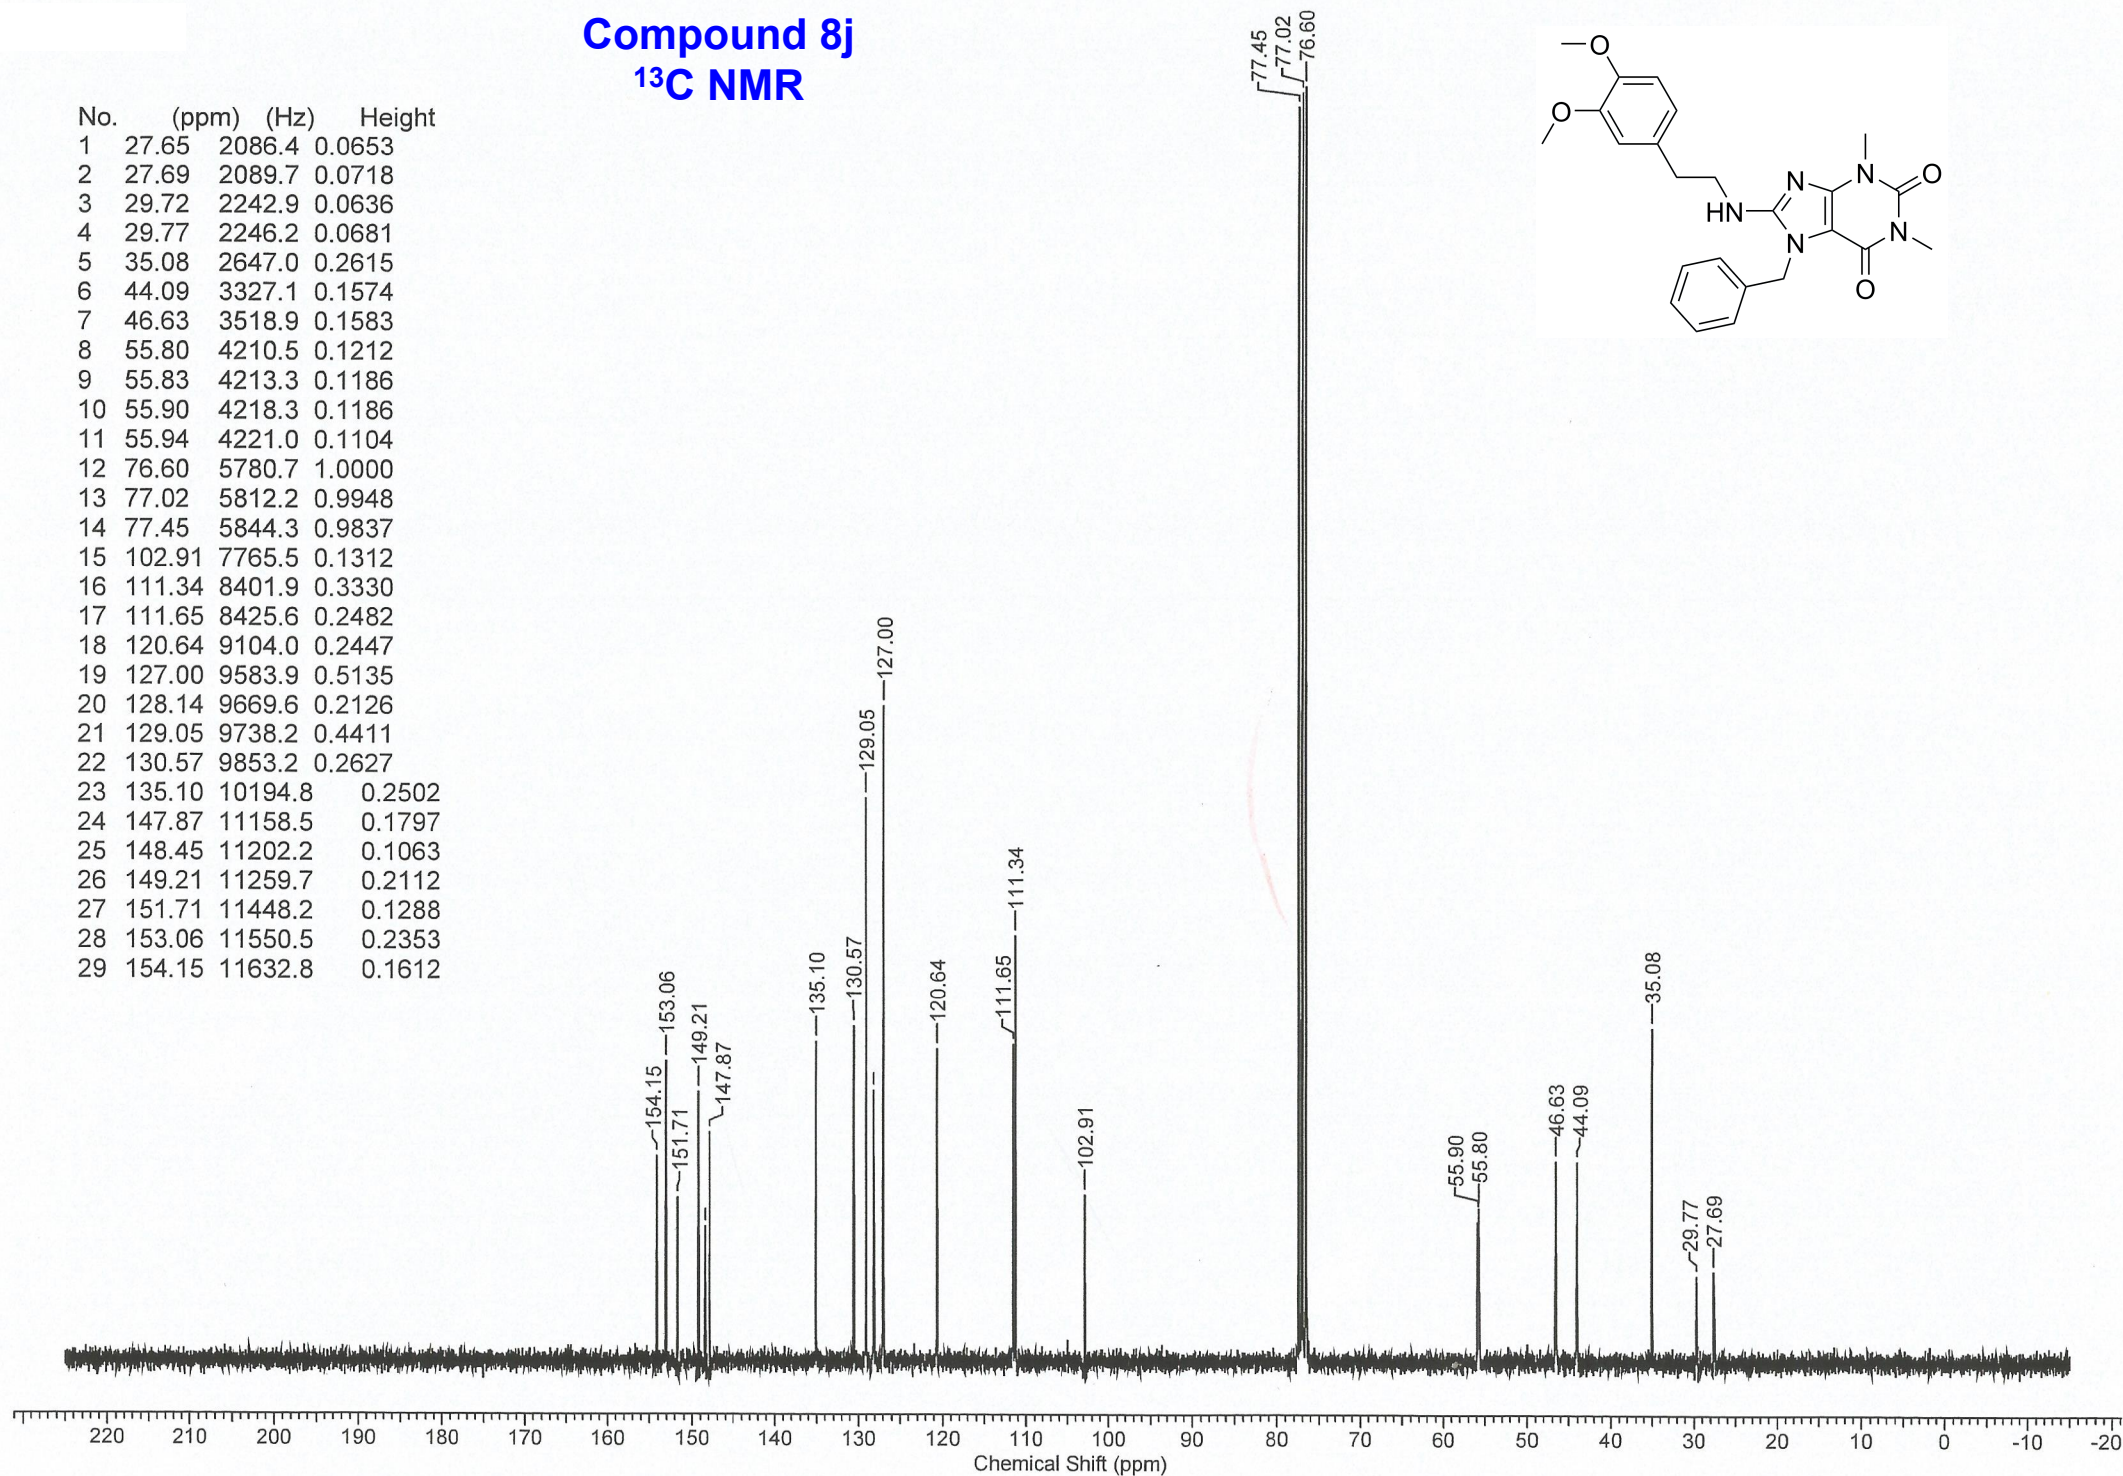

**Compound 8k**  
**<sup>1</sup>H NMR**

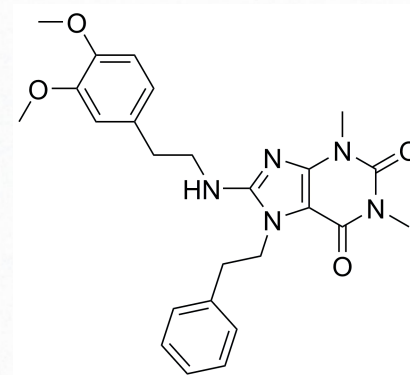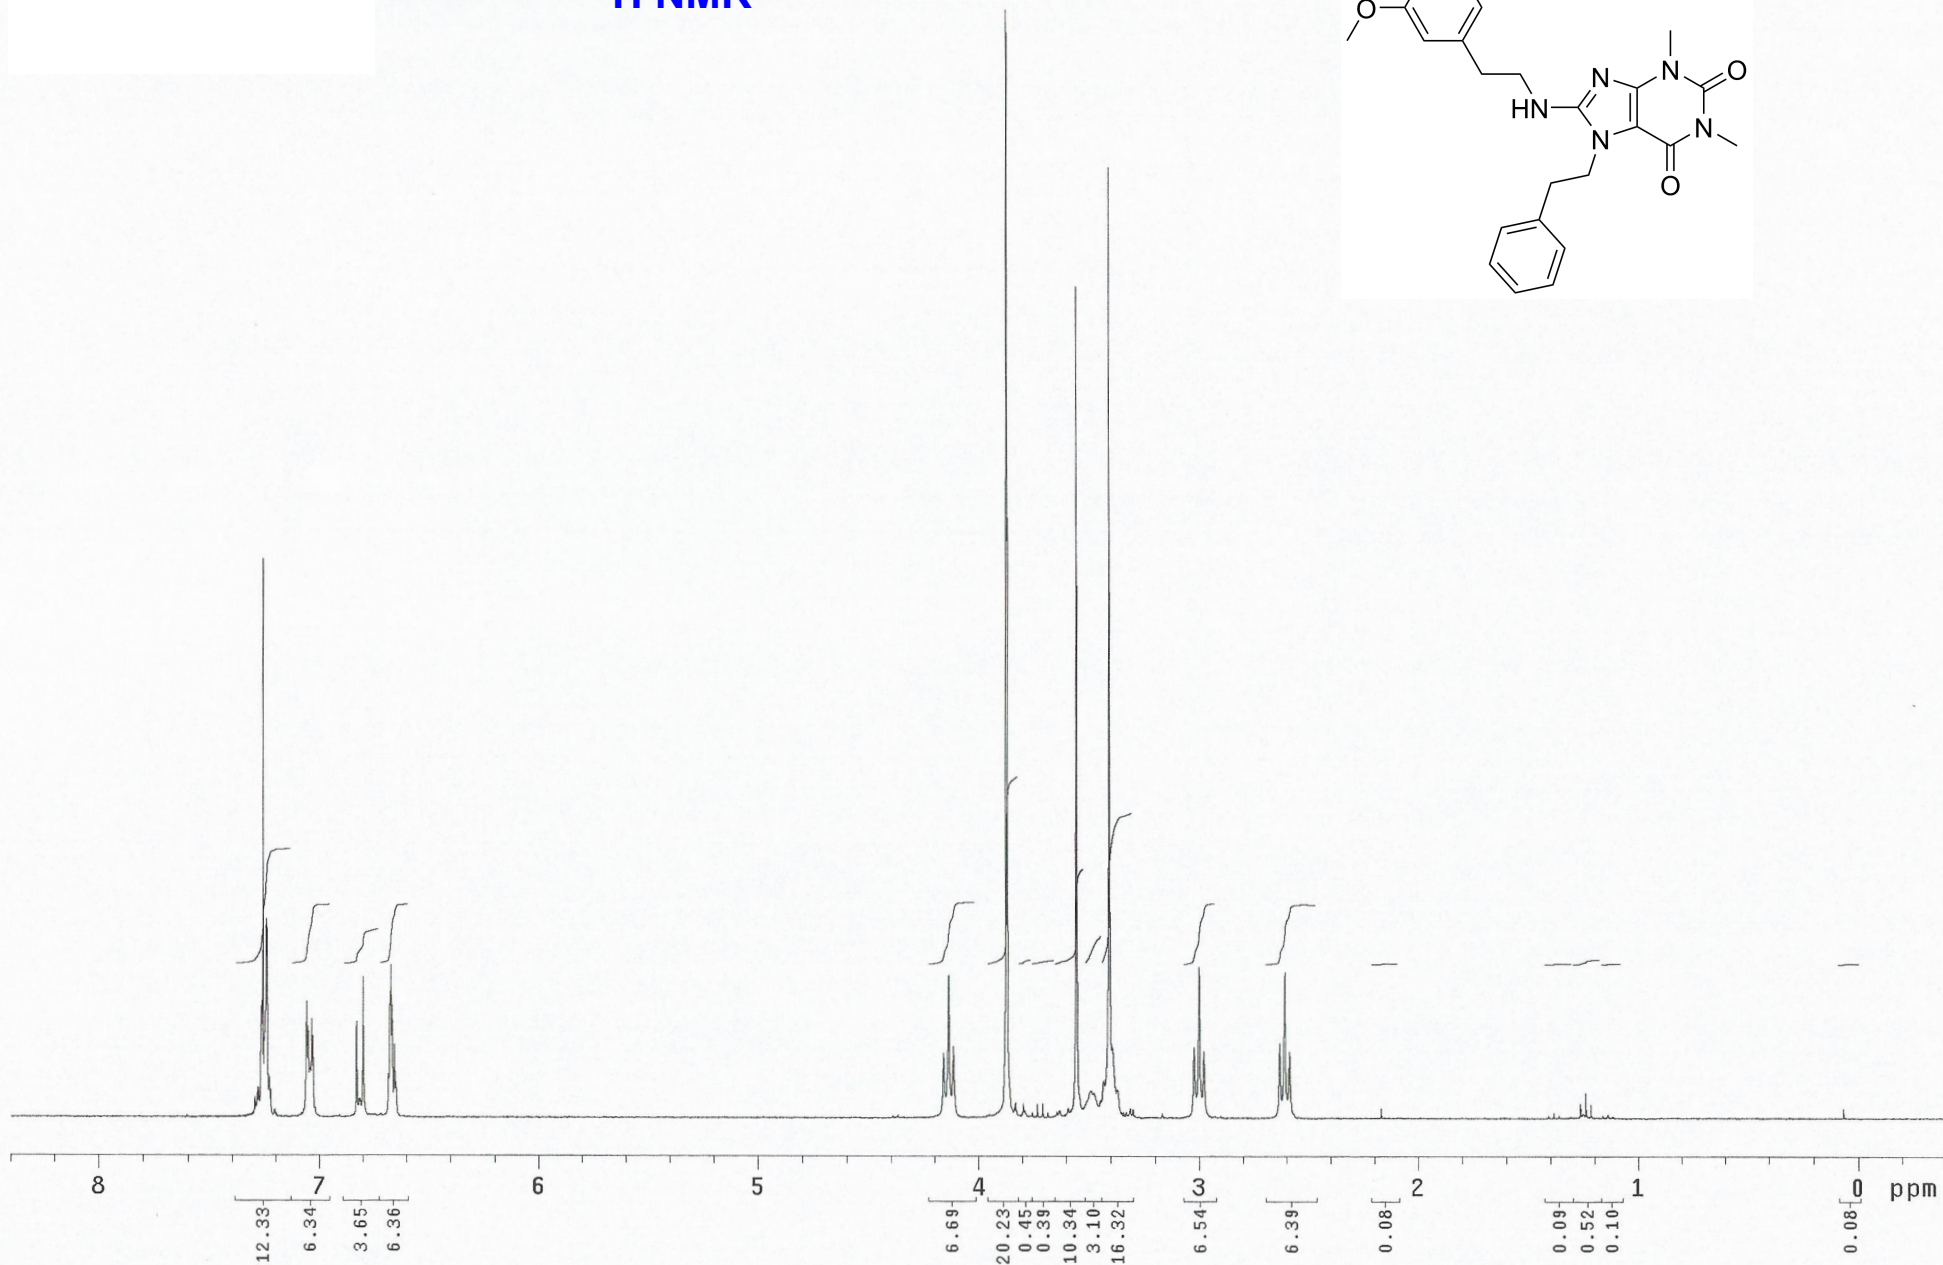

**Compound 8k**  
**<sup>1</sup>H NMR - zoom of the**  
**aliphatic region**

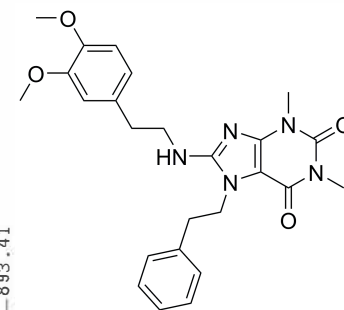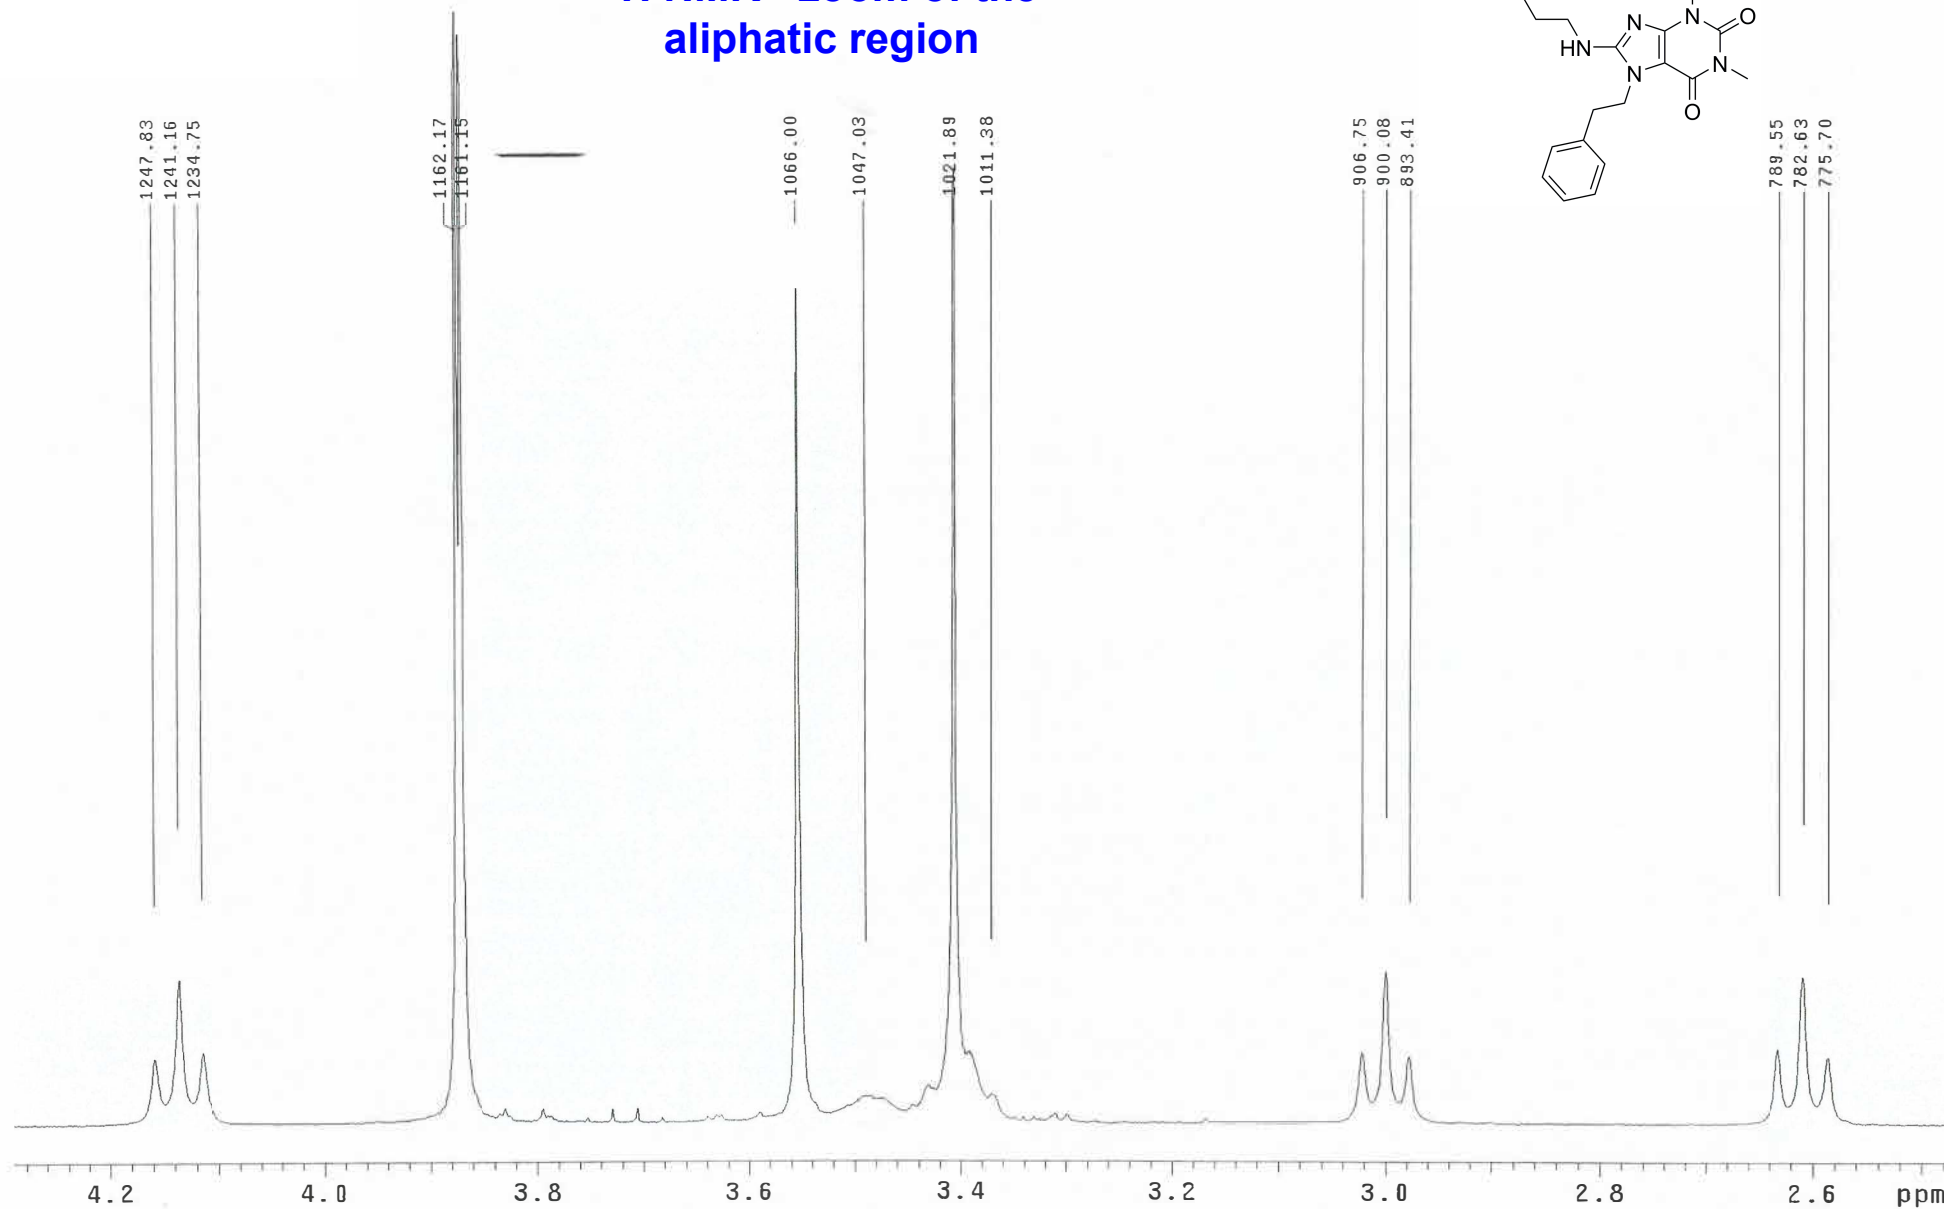

**Compound 8k**  
**<sup>1</sup>H NMR - zoom of the**  
**aromatic region**

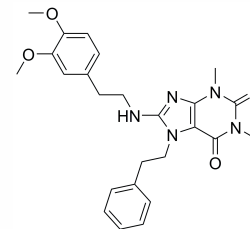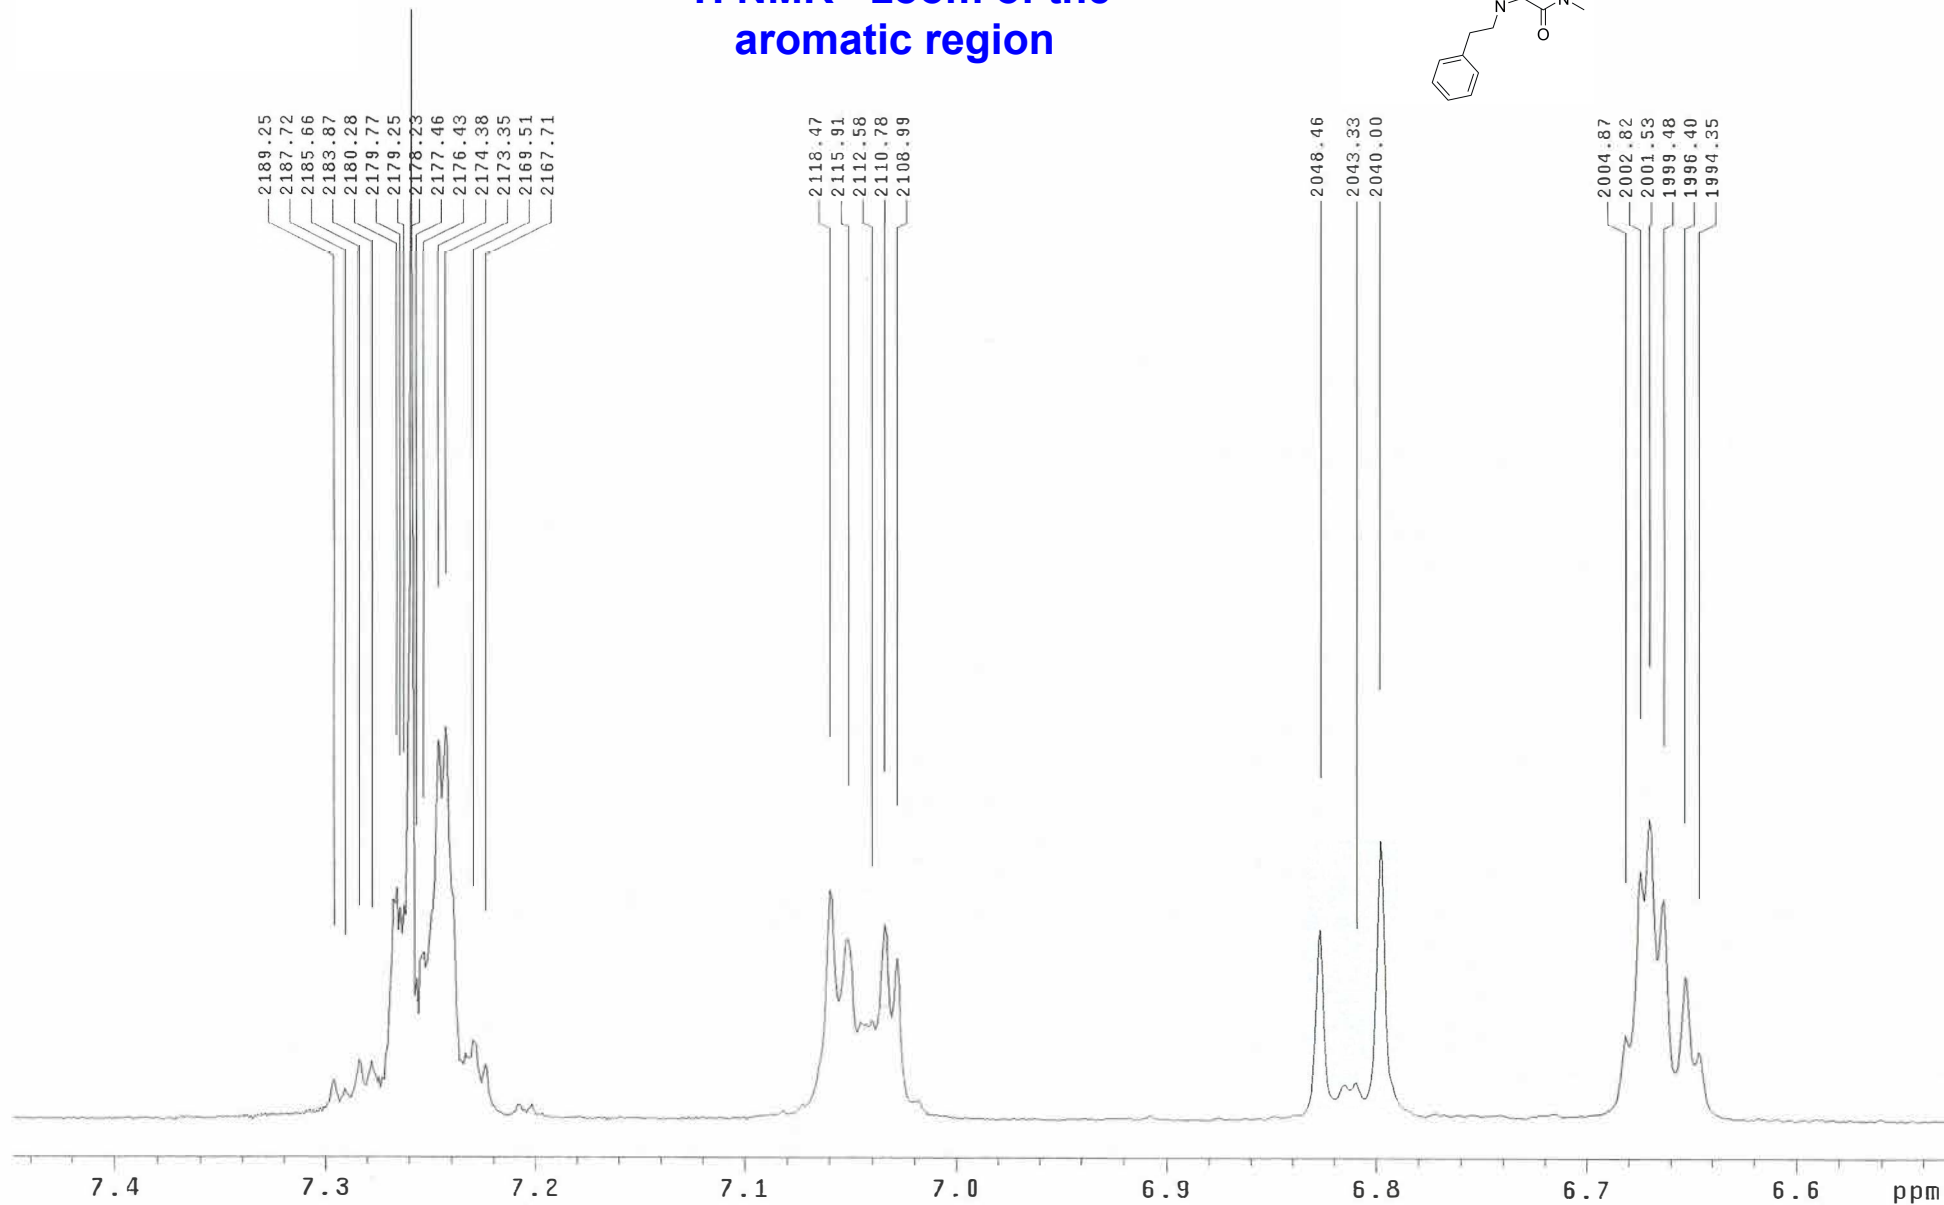

# Table of peaks

| INDEX | FREQUENCY | PPM   | HEIGHT | INDEX | FREQUENCY | PPM   | HEIGHT |
|-------|-----------|-------|--------|-------|-----------|-------|--------|
| 1     | 2189.255  | 7.296 | 2.6    | 40    | 1029.587  | 3.431 | 4.9    |
| 2     | 2185.664  | 7.284 | 3.9    | 41    | 1028.048  | 3.426 | 4.5    |
| 3     | 2183.869  | 7.278 | 3.8    | 42    | 1021.893  | 3.405 | 123.5  |
| 4     | 2182.843  | 7.274 | 2.7    | 43    | 1018.816  | 3.395 | 9.2    |
| 5     | 2182.330  | 7.273 | 2.7    | 44    | 1017.790  | 3.392 | 9.3    |
| 6     | 2180.792  | 7.267 | 14.4   | 45    | 1011.379  | 3.370 | 3.8    |
| 7     | 2180.279  | 7.266 | 15.2   | 46    | 906.747   | 3.022 | 9.3    |
| 8     | 2179.766  | 7.264 | 13.8   | 47    | 900.079   | 2.999 | 19.6   |
| 9     | 2179.253  | 7.262 | 14.0   | 48    | 893.412   | 2.977 | 8.7    |
| 10    | 2178.227  | 7.259 | 72.8   | 49    | 789.549   | 2.631 | 9.7    |
| 11    | 2177.458  | 7.256 | 9.2    | 50    | 782.625   | 2.608 | 18.9   |
| 12    | 2176.432  | 7.253 | 11.0   | 51    | 775.701   | 2.585 | 8.6    |
| 13    | 2174.380  | 7.246 | 24.9   | 52    | 371.535   | 1.238 | 3.3    |
| 14    | 2173.355  | 7.243 | 25.8   |       |           |       |        |
| 15    | 2170.534  | 7.233 | 4.3    |       |           |       |        |
| 16    | 2169.508  | 7.230 | 5.2    |       |           |       |        |
| 17    | 2167.713  | 7.224 | 3.6    |       |           |       |        |
| 18    | 2118.474  | 7.060 | 15.1   |       |           |       |        |
| 19    | 2115.910  | 7.051 | 11.9   |       |           |       |        |
| 20    | 2114.115  | 7.045 | 6.4    |       |           |       |        |
| 21    | 2112.576  | 7.040 | 6.6    |       |           |       |        |
| 22    | 2110.781  | 7.034 | 12.8   |       |           |       |        |
| 23    | 2108.986  | 7.028 | 10.6   |       |           |       |        |
| 24    | 2048.463  | 6.826 | 12.5   |       |           |       |        |
| 25    | 2040.001  | 6.798 | 18.3   |       |           |       |        |
| 26    | 2004.867  | 6.681 | 5.6    |       |           |       |        |
| 27    | 2002.815  | 6.674 | 16.4   |       |           |       |        |
| 28    | 2001.533  | 6.670 | 19.8   |       |           |       |        |
| 29    | 1999.481  | 6.663 | 14.6   |       |           |       |        |
| 30    | 1996.404  | 6.653 | 9.5    |       |           |       |        |
| 31    | 1994.352  | 6.646 | 4.6    |       |           |       |        |
| 32    | 1247.826  | 4.158 | 8.5    |       |           |       |        |
| 33    | 1241.158  | 4.136 | 18.6   |       |           |       |        |
| 34    | 1234.747  | 4.115 | 9.3    |       |           |       |        |
| 35    | 1162.171  | 3.873 | 144.0  |       |           |       |        |
| 36    | 1161.146  | 3.869 | 141.1  |       |           |       |        |
| 37    | 1066.003  | 3.552 | 108.1  |       |           |       |        |
| 38    | 1047.025  | 3.489 | 3.5    |       |           |       |        |
| 39    | 1029.074  | 3.429 | 4.8    |       |           |       |        |

# Compound 8k

## <sup>13</sup>C NMR

| No. | (ppm)  | (Hz)    | Height |
|-----|--------|---------|--------|
| 1   | 27.72  | 2789.6  | 0.2838 |
| 2   | 29.78  | 2996.5  | 0.2546 |
| 3   | 35.27  | 3549.6  | 0.2345 |
| 4   | 36.45  | 3667.7  | 0.2170 |
| 5   | 44.41  | 4469.5  | 0.2109 |
| 6   | 45.74  | 4603.0  | 0.1676 |
| 7   | 55.90  | 5624.9  | 0.2742 |
| 8   | 55.96  | 5631.5  | 0.2969 |
| 9   | 76.74  | 7722.3  | 0.9504 |
| 10  | 77.06  | 7754.6  | 1.0000 |
| 11  | 77.37  | 7786.1  | 0.9122 |
| 12  | 102.60 | 10325.1 | 0.1073 |
| 13  | 111.33 | 11203.9 | 0.2207 |
| 14  | 111.85 | 11256.0 | 0.2235 |
| 15  | 120.67 | 12143.7 | 0.2802 |
| 16  | 127.02 | 12782.6 | 0.2585 |
| 17  | 128.84 | 12965.3 | 0.4751 |
| 18  | 128.98 | 12980.0 | 0.5253 |
| 19  | 130.98 | 13181.0 | 0.1602 |
| 20  | 138.26 | 13913.1 | 0.1976 |
| 21  | 147.88 | 14881.4 | 0.1419 |
| 22  | 148.63 | 14957.0 | 0.0843 |
| 23  | 149.18 | 15012.0 | 0.1368 |
| 24  | 151.81 | 15276.8 | 0.1255 |
| 25  | 153.00 | 15397.1 | 0.1539 |
| 26  | 154.00 | 15497.7 | 0.1447 |

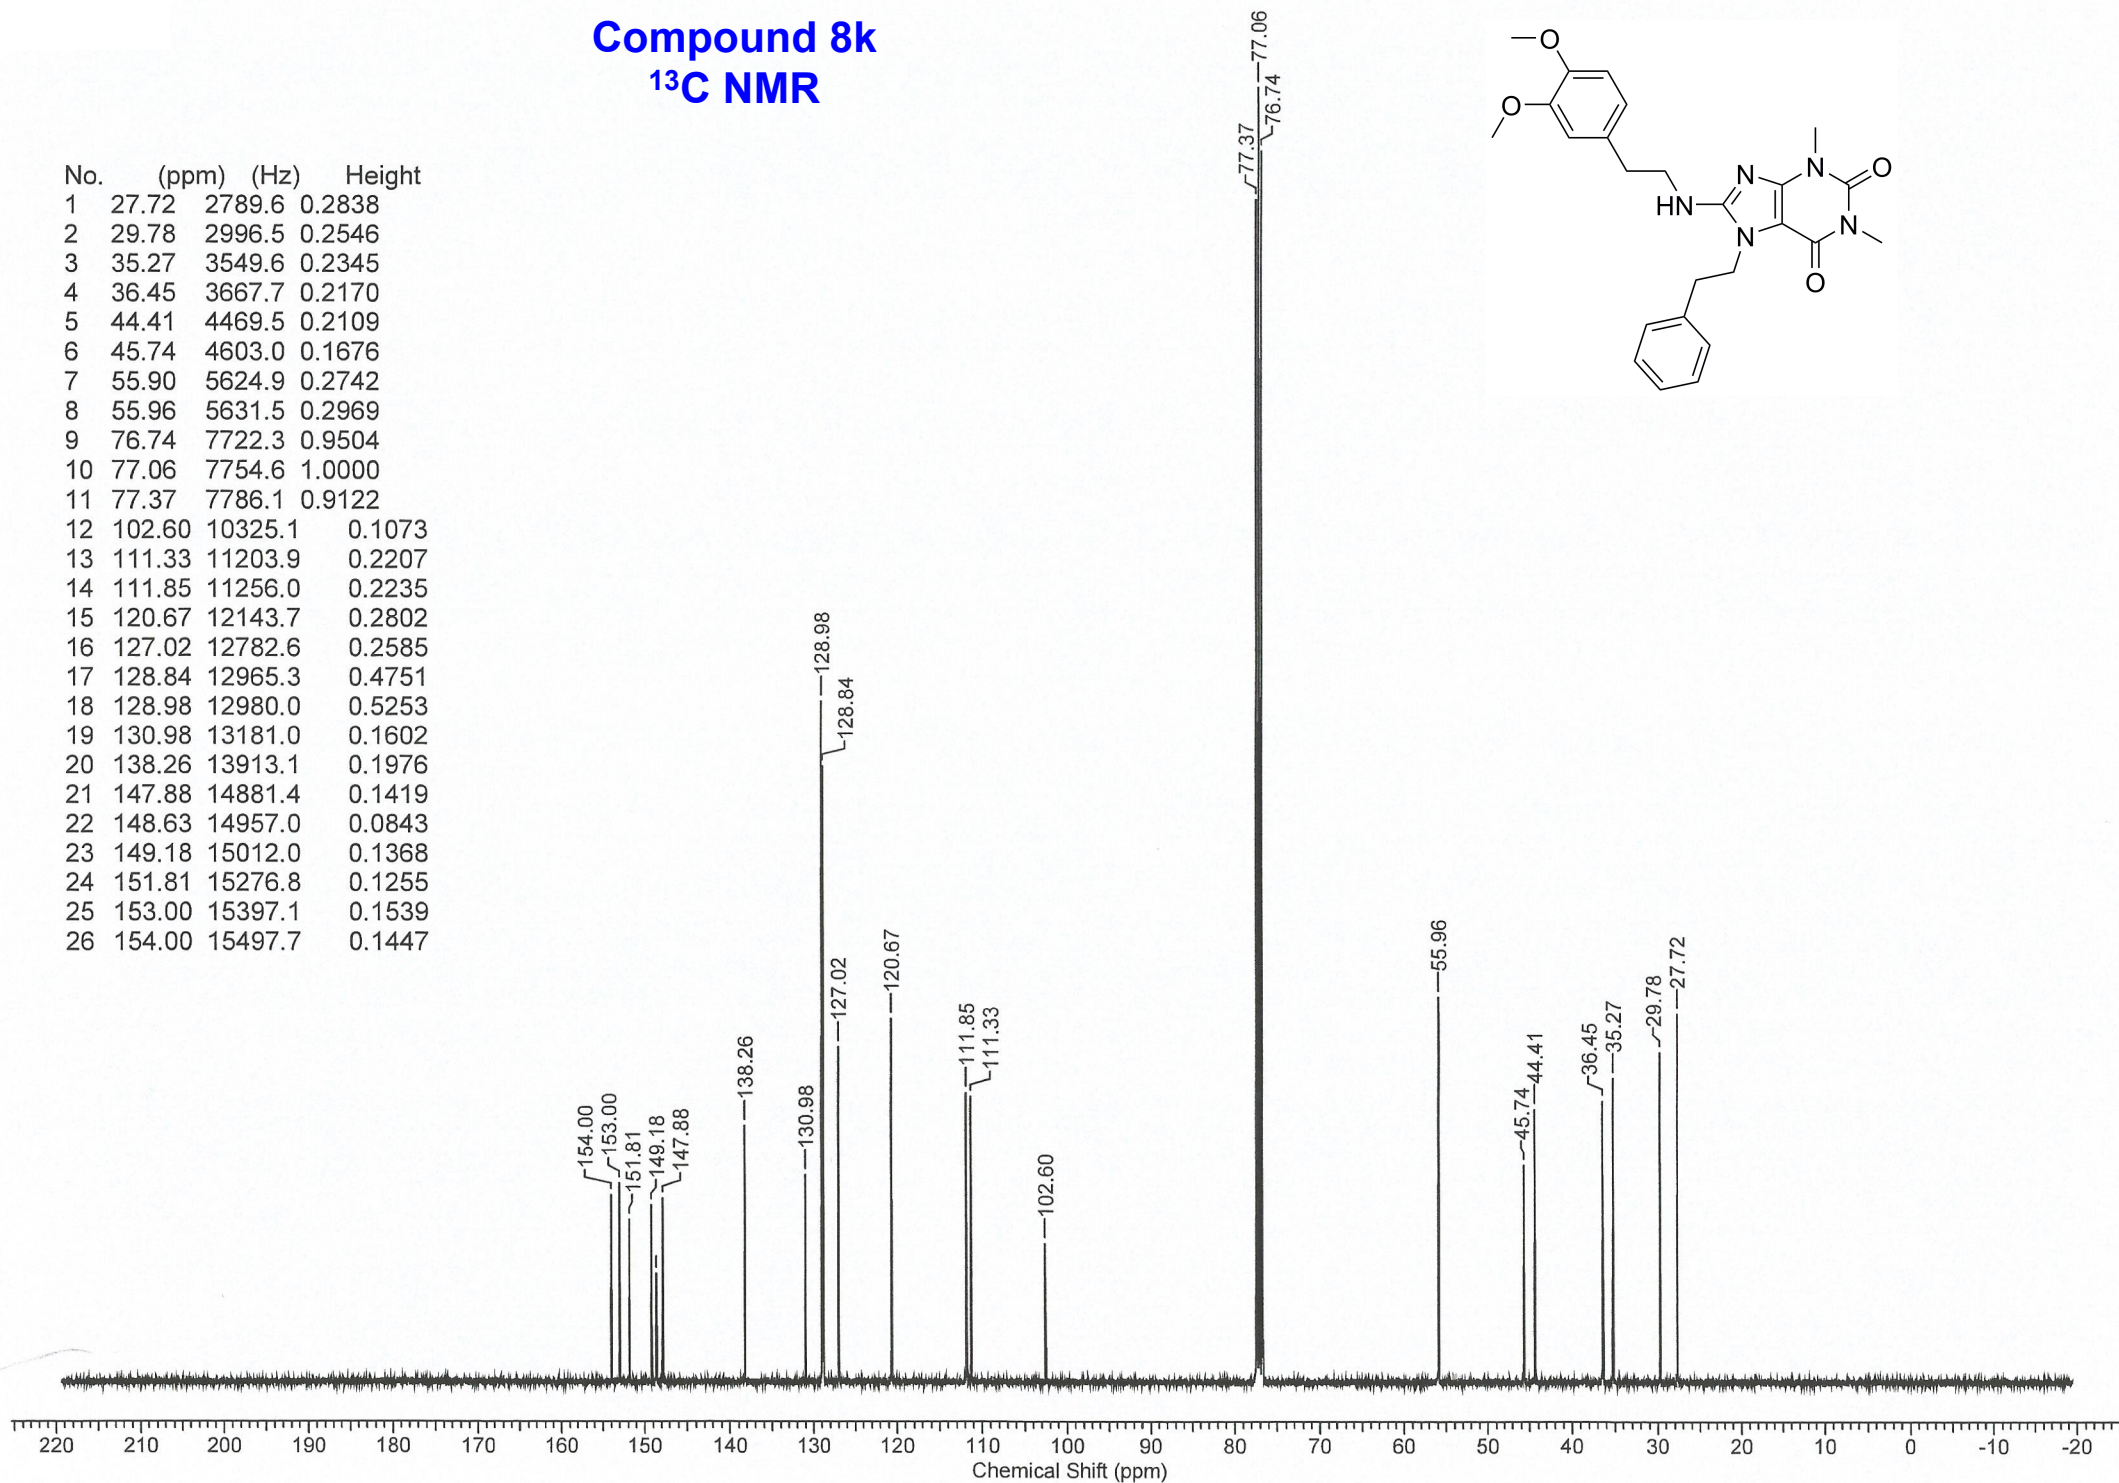

**Compound 8l**  
**<sup>1</sup>H NMR**

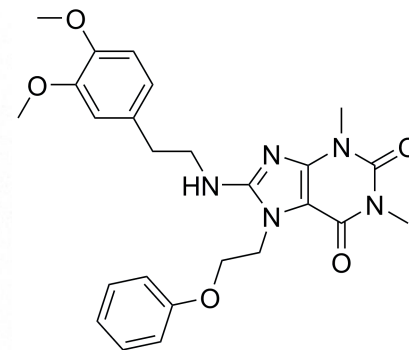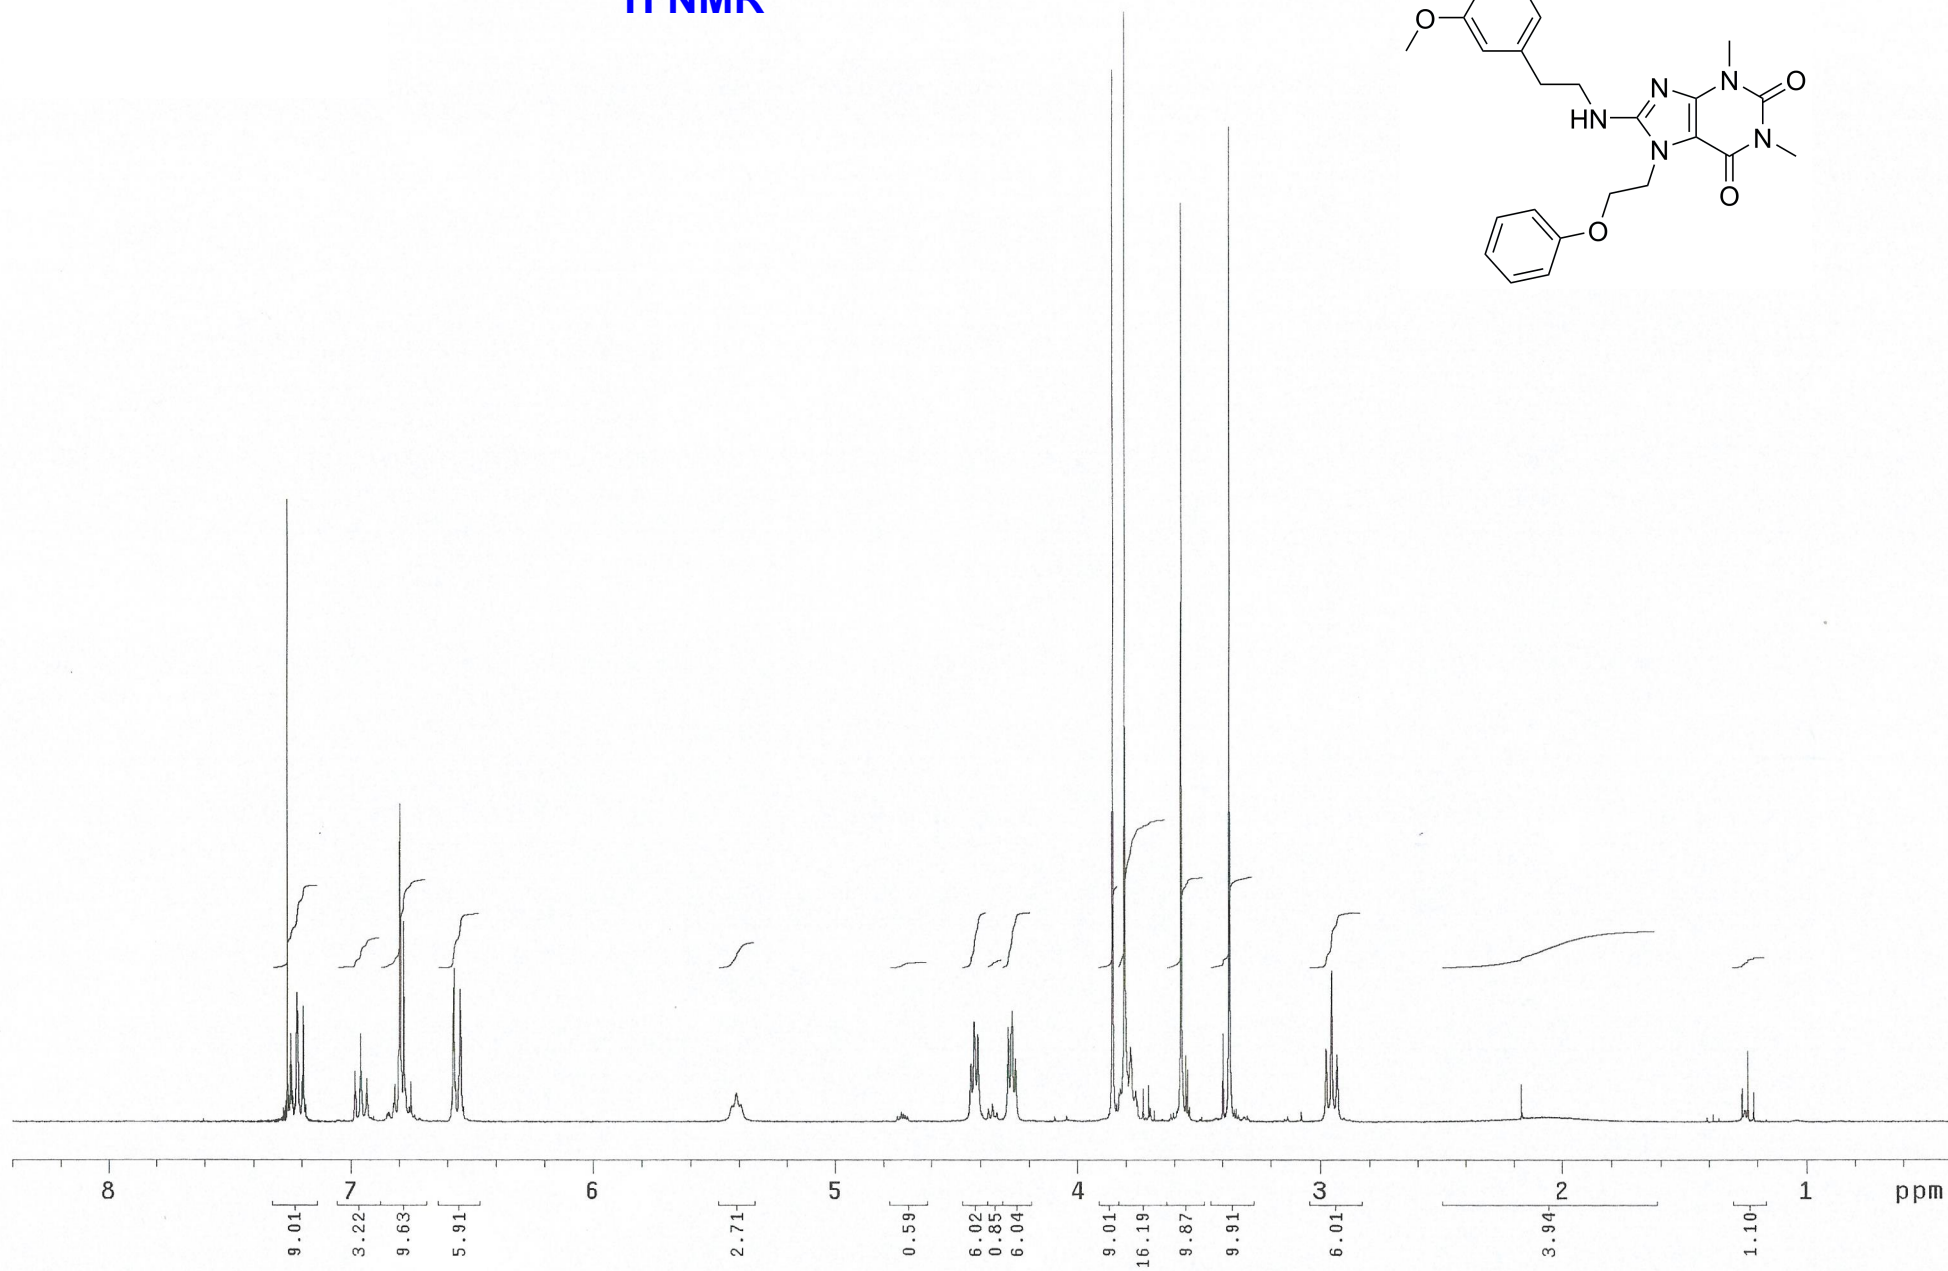

**Compound 8l**  
**<sup>1</sup>H NMR - zoom of the**  
**aliphatic region**

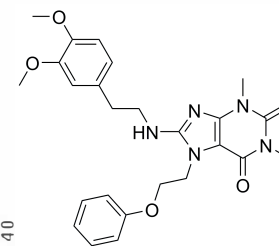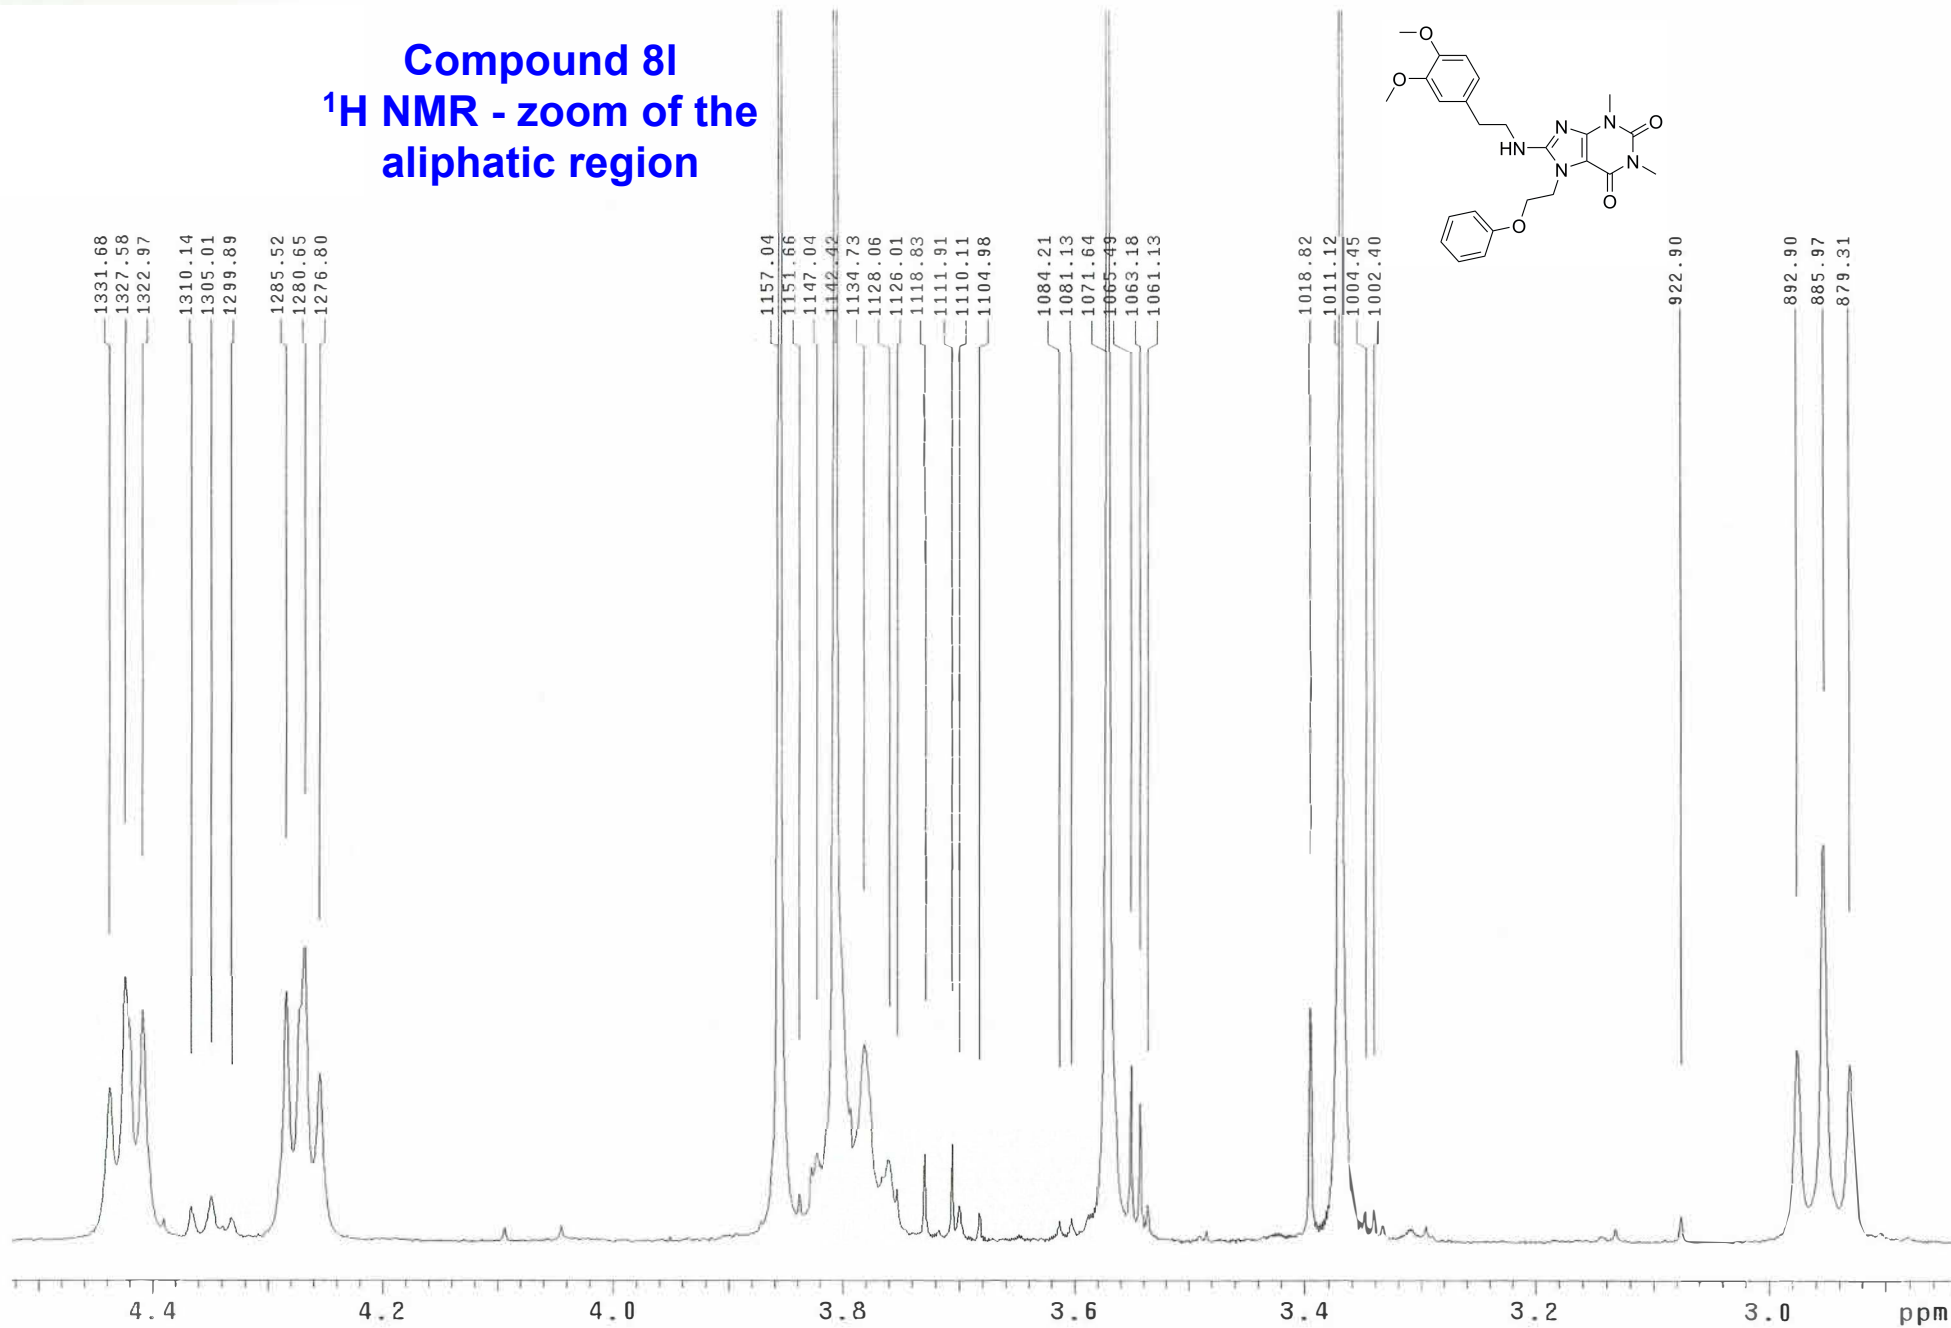

**Compound 8l**  
**<sup>1</sup>H NMR - zoom of the**  
**aromatic region**

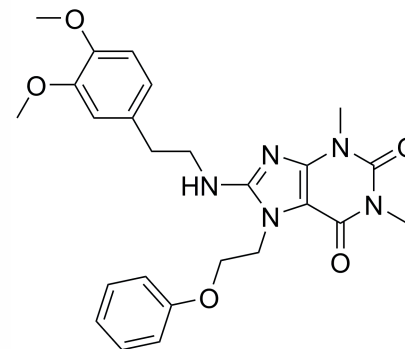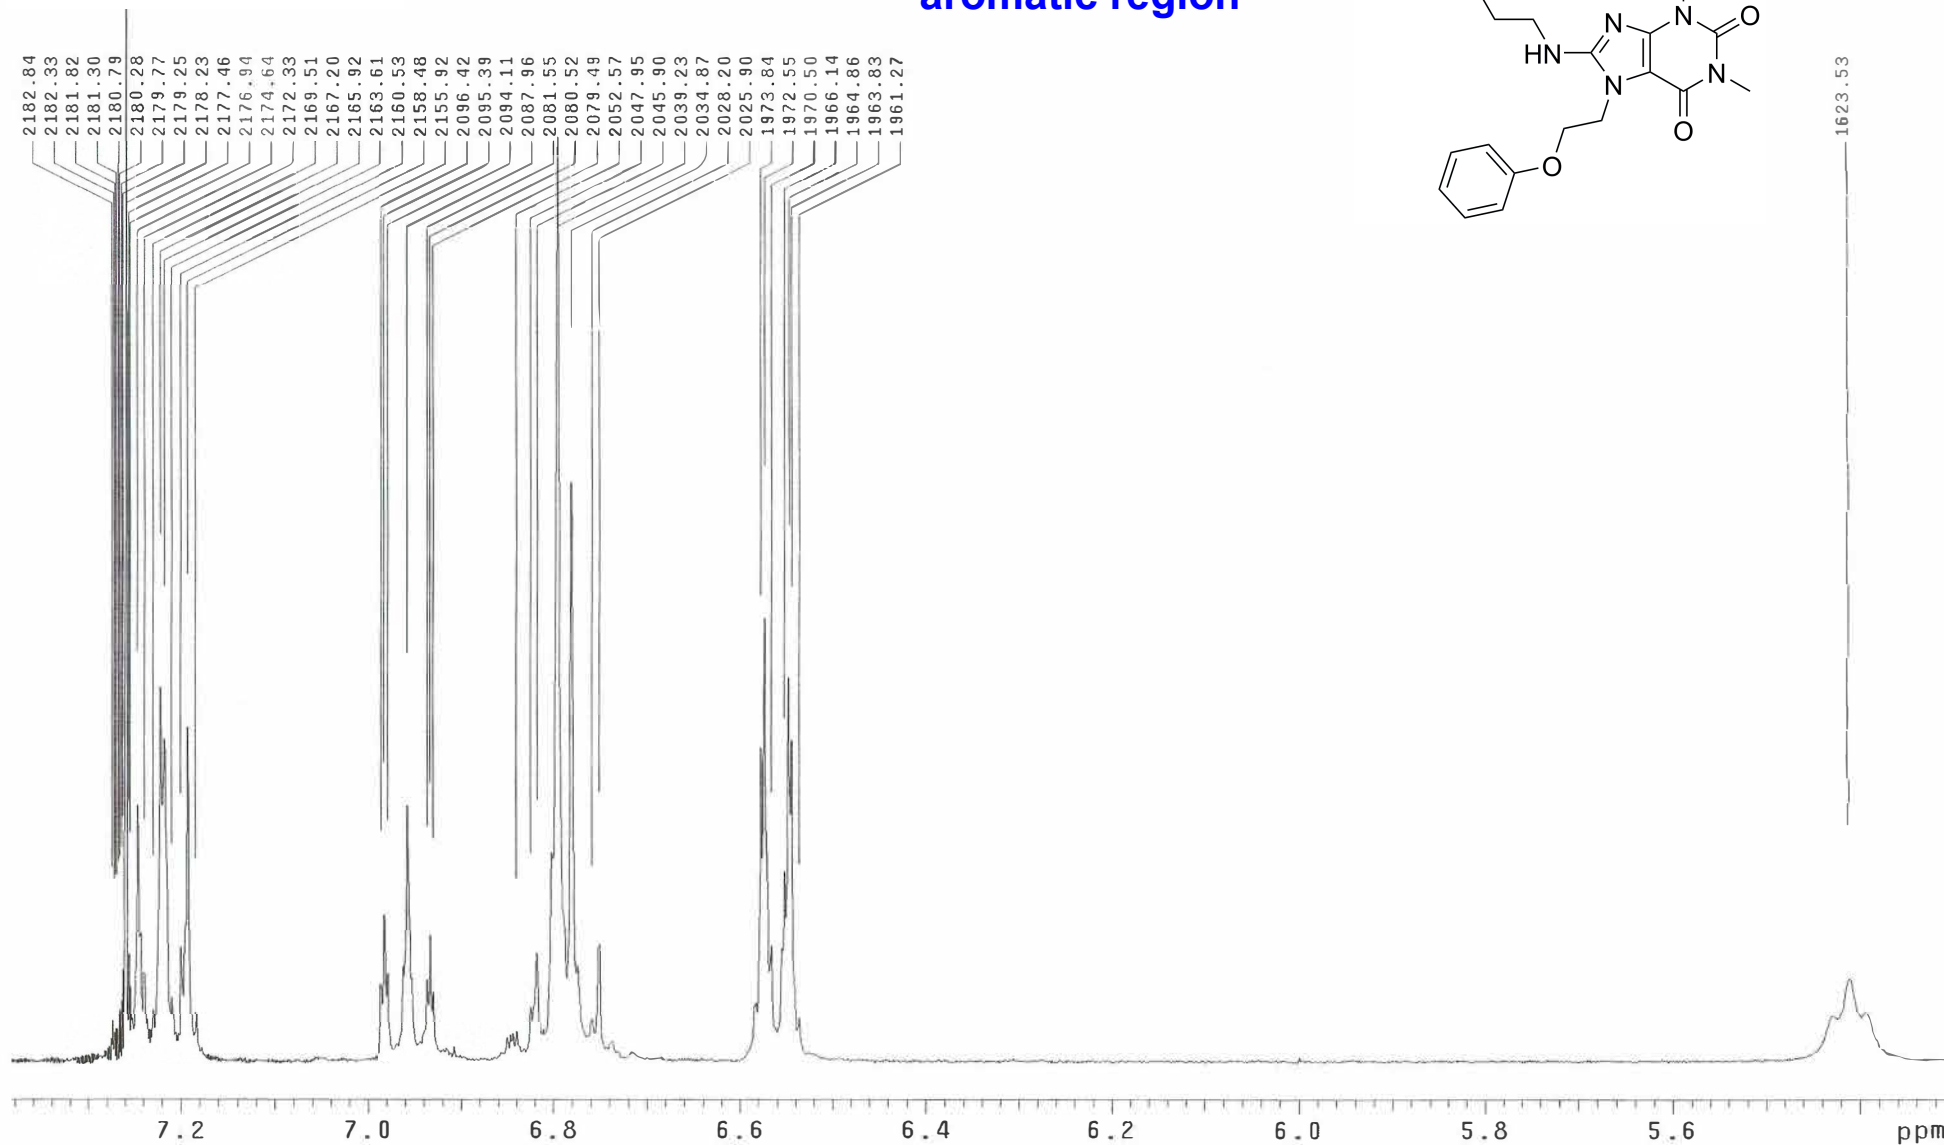

# Table of peaks

| INDEX | FREQUENCY | PPM   | HEIGHT | INDEX | FREQUENCY | PPM    | HEIGHT |
|-------|-----------|-------|--------|-------|-----------|--------|--------|
| 1     | 2179.766  | 7.264 | 2.7    | 40    | 1276.805  | 4.255/ | 8.2    |
| 2     | 2179.253  | 7.262 | 4.1    | 41    | 1157.042  | 3.856  | 136.4  |
| 3     | 2178.227  | 7.259 | 80.9   | 42    | 1148.580  | 3.828  | 3.7    |
| 4     | 2177.458  | 7.256 | 4.8    | 43    | 1147.041  | 3.822  | 4.3    |
| 5     | 2176.945  | 7.255 | 3.3    | 44    | 1142.425  | 3.807  | 144.0  |
| 6     | 2174.637  | 7.247 | 11.4   | 45    | 1138.322  | 3.793  | 6.6    |
| 7     | 2172.329  | 7.239 | 4.0    | 46    | 1134.731  | 3.781  | 9.7    |
| 8     | 2167.200  | 7.222 | 16.8   | 47    | 1128.063  | 3.759  | 4.0    |
| 9     | 2165.918  | 7.218 | 14.4   | 48    | 1126.012  | 3.752  | 2.6    |
| 10    | 2163.610  | 7.210 | 2.9    | 49    | 1118.831  | 3.728  | 4.3    |
| 11    | 2160.532  | 7.200 | 5.1    | 50    | 1111.907  | 3.705  | 4.8    |
| 12    | 2158.481  | 7.193 | 15.0   | 51    | 1071.644  | 3.571  | 119.2  |
| 13    | 2096.420  | 6.986 | 3.4    | 52    | 1065.490  | 3.551  | 8.7    |
| 14    | 2095.394  | 6.983 | 6.5    | 53    | 1063.182  | 3.543  | 6.8    |
| 15    | 2094.112  | 6.979 | 3.9    | 54    | 1018.816  | 3.395  | 11.5   |
| 16    | 2089.239  | 6.962 | 4.2    | 55    | 1011.122  | 3.370  | 129.0  |
| 17    | 2087.957  | 6.958 | 11.4   | 56    | 892.899   | 2.976  | 9.4    |
| 18    | 2081.545  | 6.937 | 3.7    | 57    | 885.974   | 2.952  | 19.5   |
| 19    | 2080.520  | 6.933 | 5.6    | 58    | 879.307   | 2.930  | 8.7    |
| 20    | 2079.494  | 6.930 | 3.1    | 59    | 650.040   | 2.166  | 4.8    |
| 21    | 2045.899  | 6.818 | 4.9    | 60    | 378.716   | 1.262  | 4.4    |
| 22    | 2041.026  | 6.802 | 9.3    | 61    | 371.792   | 1.239  | 9.2    |
| 23    | 2039.231  | 6.796 | 41.3   | 62    | 364.868   | 1.216  | 3.8    |
| 24    | 2034.872  | 6.781 | 26.0   |       |           |        |        |
| 25    | 2032.820  | 6.774 | 4.3    |       |           |        |        |
| 26    | 2025.896  | 6.751 | 5.2    |       |           |        |        |
| 27    | 1975.375  | 6.583 | 2.6    |       |           |        |        |
| 28    | 1973.836  | 6.578 | 14.0   |       |           |        |        |
| 29    | 1972.554  | 6.573 | 19.9   |       |           |        |        |
| 30    | 1970.503  | 6.567 | 5.2    |       |           |        |        |
| 31    | 1966.143  | 6.552 | 8.5    |       |           |        |        |
| 32    | 1964.861  | 6.548 | 17.2   |       |           |        |        |
| 33    | 1963.835  | 6.544 | 14.4   |       |           |        |        |
| 34    | 1623.525  | 5.410 | 3.7    |       |           |        |        |
| 35    | 1331.685  | 4.438 | 7.6    |       |           |        |        |
| 36    | 1327.582  | 4.424 | 13.0   |       |           |        |        |
| 37    | 1322.966  | 4.409 | 11.4   |       |           |        |        |
| 38    | 1285.524  | 4.284 | 12.3   |       |           |        |        |
| 39    | 1280.651  | 4.268 | 14.4   |       |           |        |        |

# Compound 8l

## <sup>13</sup>C NMR

| No. | (ppm)  | (Hz)    | Height |
|-----|--------|---------|--------|
| 1   | 27.65  | 2782.2  | 0.1882 |
| 2   | 29.86  | 3005.3  | 0.1727 |
| 3   | 35.59  | 3581.1  | 0.1426 |
| 4   | 43.87  | 4415.2  | 0.1209 |
| 5   | 44.65  | 4493.0  | 0.1482 |
| 6   | 55.86  | 5621.3  | 0.2182 |
| 7   | 55.88  | 5623.5  | 0.2061 |
| 8   | 68.45  | 6888.2  | 0.1414 |
| 9   | 76.73  | 7721.5  | 0.9502 |
| 10  | 77.04  | 7753.1  | 1.0000 |
| 11  | 77.36  | 7785.4  | 0.9776 |
| 12  | 102.73 | 10338.3 | 0.0802 |
| 13  | 111.41 | 11212.0 | 0.1552 |
| 14  | 111.90 | 11261.1 | 0.1562 |
| 15  | 114.25 | 11497.4 | 0.3318 |
| 16  | 120.72 | 12148.1 | 0.1944 |
| 17  | 121.88 | 12264.7 | 0.1656 |
| 18  | 129.60 | 13041.6 | 0.4027 |
| 19  | 131.08 | 13190.5 | 0.1160 |
| 20  | 147.94 | 14888.0 | 0.0799 |
| 21  | 148.52 | 14946.0 | 0.0498 |
| 22  | 149.25 | 15019.3 | 0.1044 |
| 23  | 151.71 | 15266.6 | 0.0819 |
| 24  | 154.21 | 15518.9 | 0.0954 |
| 25  | 154.52 | 15549.7 | 0.1026 |
| 26  | 157.39 | 15838.8 | 0.0977 |

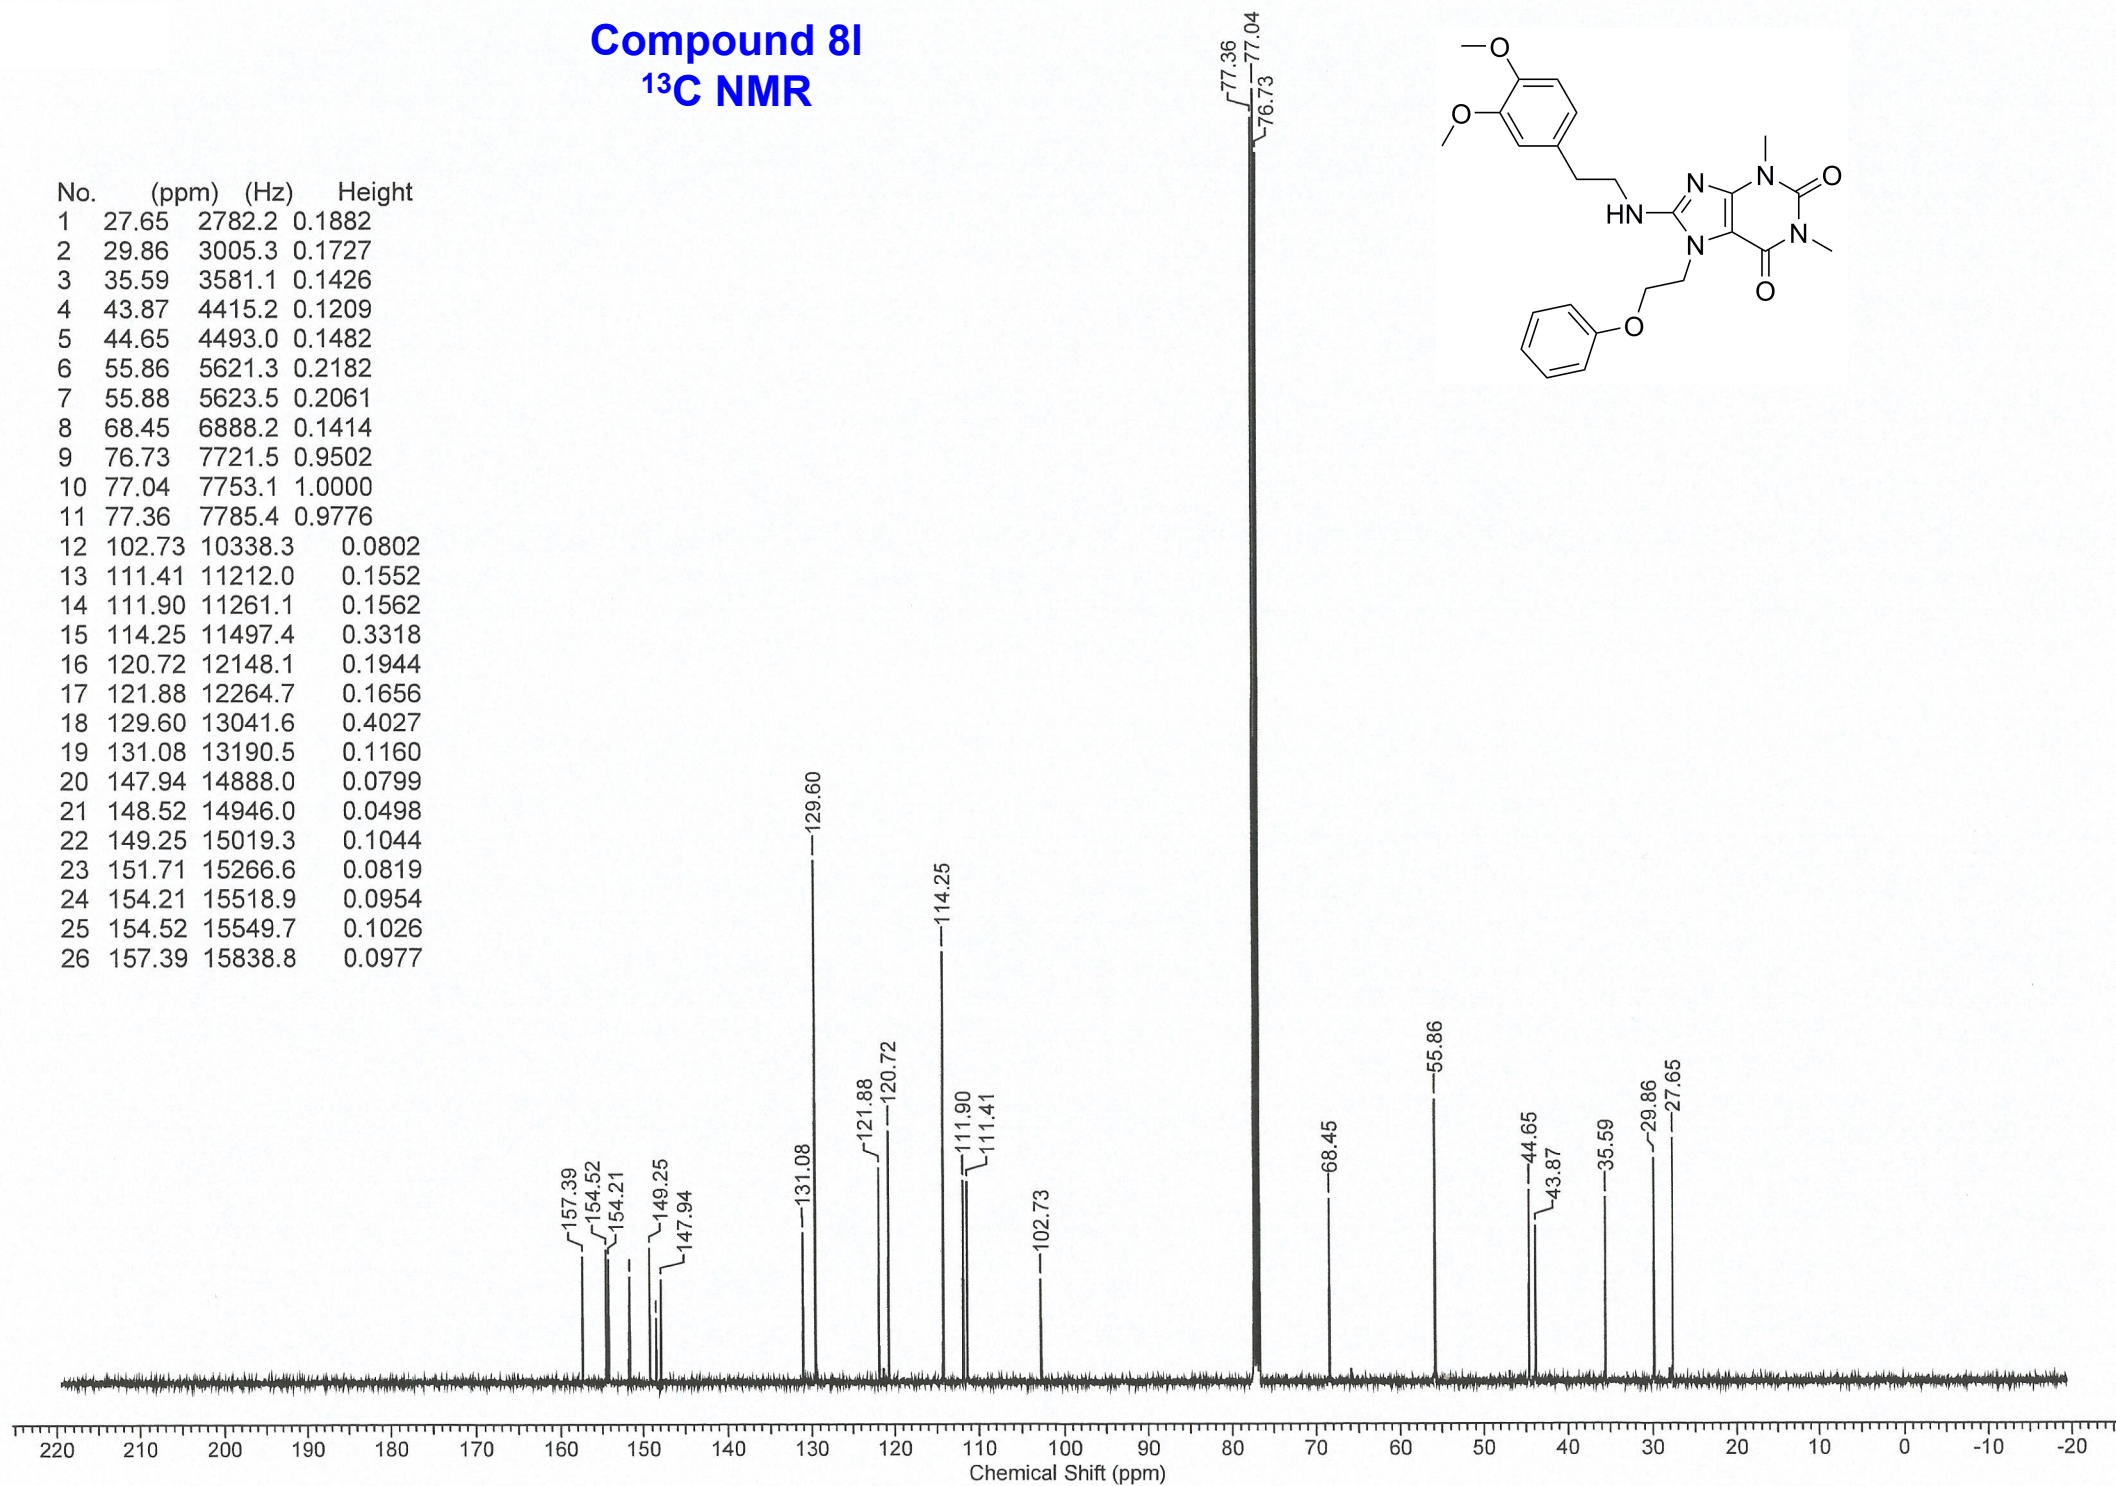

**Compound 9**  
 **$^1\text{H}$  NMR - zoom of the**  
**aromatic region**

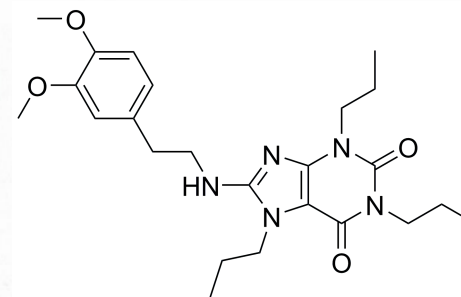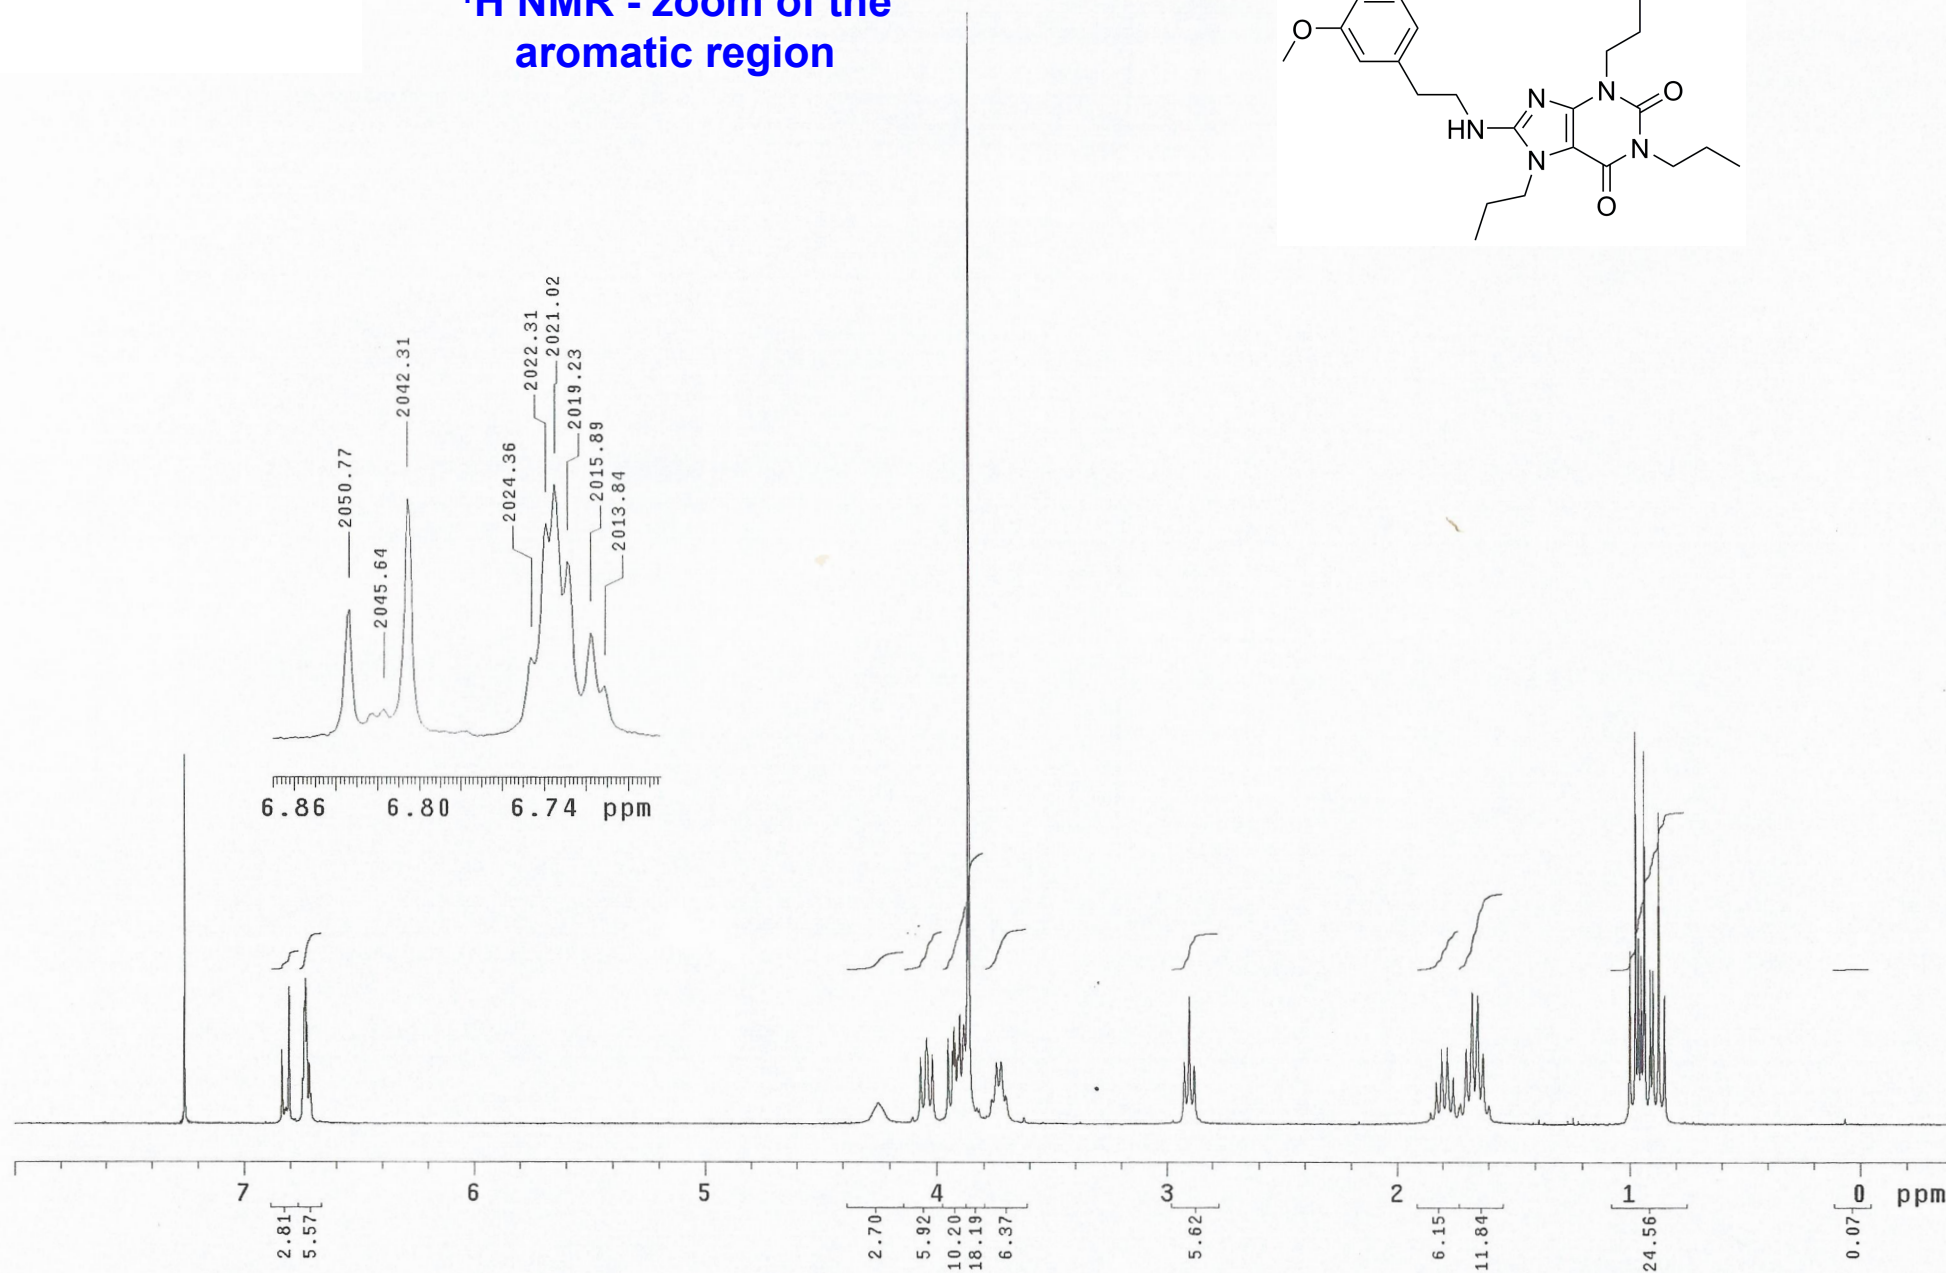

**Compound 9**  
**<sup>1</sup>H NMR - zoom of the**  
**aliphatic region**

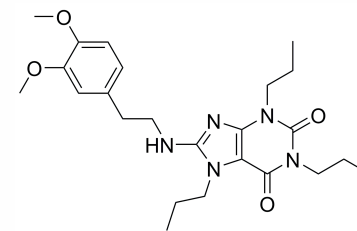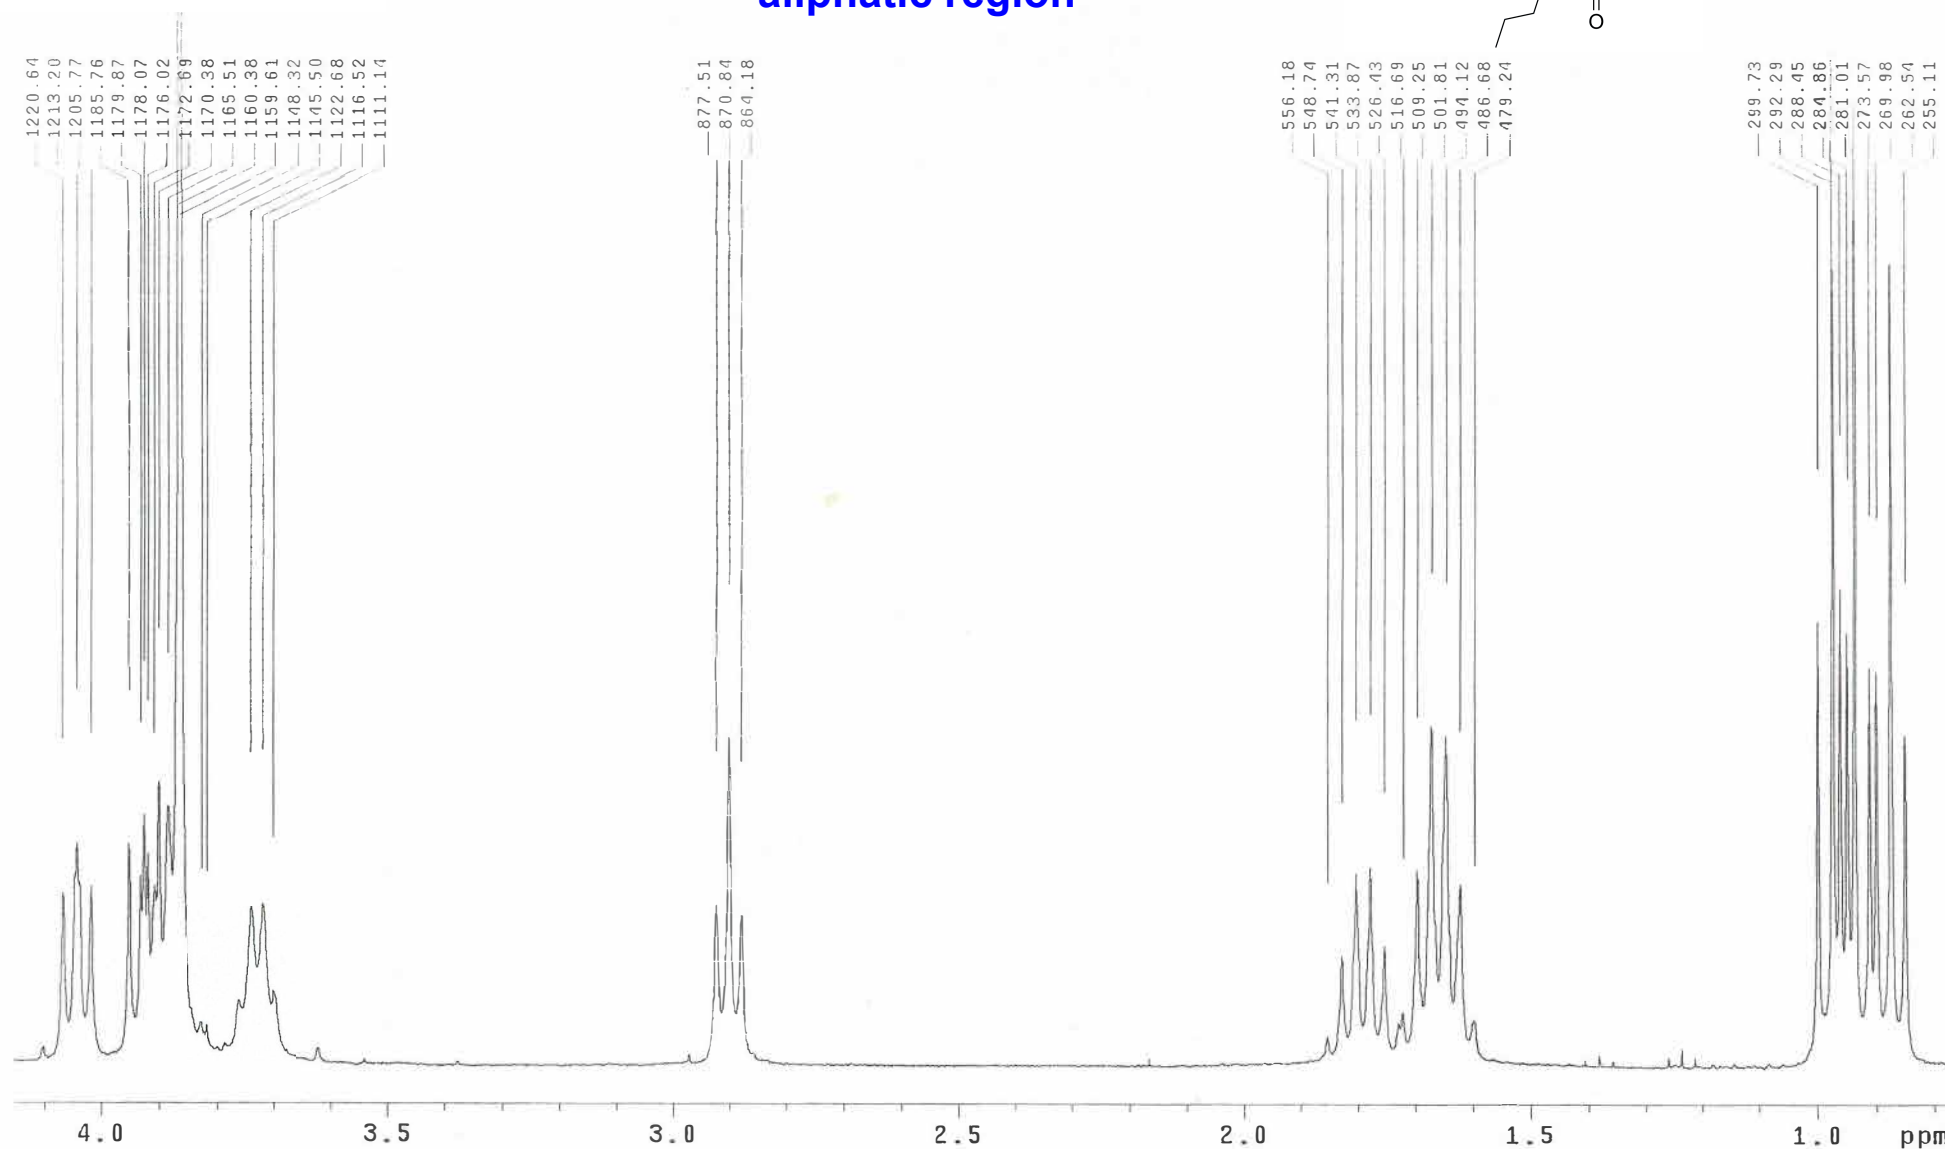

# Table of peaks

| INDEX | FREQUENCY | PPM   | HEIGHT | INDEX | FREQUENCY | PPM   | HEIGHT |
|-------|-----------|-------|--------|-------|-----------|-------|--------|
| 1     | 2177.971  | 7.258 | 17.8   | 40    | 292.292   | 0.974 | 50.9   |
| 2     | 2050.771  | 6.834 | 9.6    | 41    | 288.145   | 0.961 | 24.1   |
| 3     | 2042.309  | 6.806 | 17.7   | 42    | 284.855   | 0.949 | 21.9   |
| 4     | 2024.357  | 6.746 | 6.0    | 43    | 281.008   | 0.936 | 48.5   |
| 5     | 2022.305  | 6.739 | 15.9   | 44    | 273.571   | 0.912 | 20.1   |
| 6     | 2021.023  | 6.735 | 18.8   | 45    | 269.981   | 0.900 | 19.9   |
| 7     | 2019.228  | 6.729 | 13.1   | 46    | 262.544   | 0.875 | 40.4   |
| 8     | 2015.894  | 6.718 | 7.8    | 47    | 255.107   | 0.850 | 16.7   |
| 9     | 2013.843  | 6.711 | 3.9    |       |           |       |        |
| 10    | 1274.497  | 4.242 | 2.8    |       |           |       |        |
| 11    | 1220.642  | 4.068 | 8.7    |       |           |       |        |
| 12    | 1213.205  | 4.043 | 11.2   |       |           |       |        |
| 13    | 1205.768  | 4.018 | 9.0    |       |           |       |        |
| 14    | 1185.765  | 3.952 | 11.1   |       |           |       |        |
| 15    | 1179.866  | 3.932 | 9.5    |       |           |       |        |
| 16    | 1178.071  | 3.926 | 12.6   |       |           |       |        |
| 17    | 1176.020  | 3.919 | 10.6   |       |           |       |        |
| 18    | 1172.686  | 3.908 | 9.0    |       |           |       |        |
| 19    | 1170.378  | 3.900 | 14.2   |       |           |       |        |
| 20    | 1165.505  | 3.884 | 13.0   |       |           |       |        |
| 21    | 1160.376  | 3.867 | 140.0  |       |           |       |        |
| 22    | 1159.607  | 3.864 | 144.0  |       |           |       |        |
| 23    | 1128.833  | 3.762 | 3.2    |       |           |       |        |
| 24    | 1122.678  | 3.741 | 7.9    |       |           |       |        |
| 25    | 1116.523  | 3.721 | 8.1    |       |           |       |        |
| 26    | 1111.138  | 3.703 | 3.7    |       |           |       |        |
| 27    | 877.512   | 2.924 | 8.1    |       |           |       |        |
| 28    | 870.844   | 2.902 | 16.5   |       |           |       |        |
| 29    | 864.176   | 2.880 | 7.5    |       |           |       |        |
| 30    | 548.742   | 1.829 | 5.5    |       |           |       |        |
| 31    | 541.305   | 1.804 | 9.7    |       |           |       |        |
| 32    | 533.868   | 1.779 | 10.0   |       |           |       |        |
| 33    | 526.431   | 1.754 | 6.1    |       |           |       |        |
| 34    | 516.686   | 1.722 | 2.7    |       |           |       |        |
| 35    | 509.249   | 1.697 | 9.9    |       |           |       |        |
| 36    | 501.812   | 1.672 | 17.1   |       |           |       |        |
| 37    | 494.119   | 1.647 | 16.7   |       |           |       |        |
| 38    | 486.681   | 1.622 | 9.1    |       |           |       |        |
| 39    | 299.729   | 0.999 | 22.4   |       |           |       |        |

# Compound 9 <sup>13</sup>C NMR

| No. | (ppm)  | (Hz)    | Height |
|-----|--------|---------|--------|
| 1   | 10.98  | 1105.2  | 0.2166 |
| 2   | 11.27  | 1133.9  | 0.2450 |
| 3   | 11.36  | 1143.4  | 0.2573 |
| 4   | 21.44  | 2158.0  | 0.4100 |
| 5   | 22.84  | 2298.8  | 0.1954 |
| 6   | 35.36  | 3558.4  | 0.1891 |
| 7   | 42.58  | 4284.6  | 0.1740 |
| 8   | 44.55  | 4483.4  | 0.1622 |
| 9   | 44.81  | 4509.1  | 0.2170 |
| 10  | 55.87  | 5622.7  | 0.2680 |
| 11  | 55.96  | 5631.5  | 0.2645 |
| 12  | 76.74  | 7722.3  | 1.0000 |
| 13  | 77.06  | 7754.6  | 0.9634 |
| 14  | 77.37  | 7786.1  | 0.9963 |
| 15  | 102.96 | 10361.0 | 0.0839 |
| 16  | 111.39 | 11209.1 | 0.1915 |
| 17  | 111.95 | 11265.5 | 0.1882 |
| 18  | 120.80 | 12156.1 | 0.2465 |
| 19  | 131.07 | 13189.8 | 0.1209 |
| 20  | 147.89 | 14882.9 | 0.1268 |
| 21  | 149.21 | 15015.7 | 0.1272 |
| 22  | 151.18 | 15213.8 | 0.1194 |
| 23  | 152.33 | 15329.7 | 0.0673 |
| 24  | 153.86 | 15483.7 | 0.1009 |

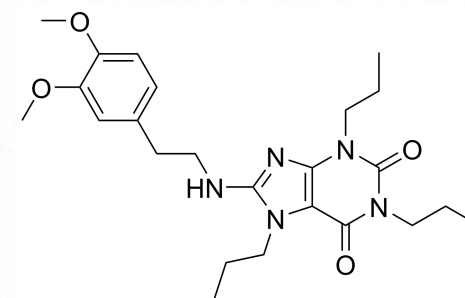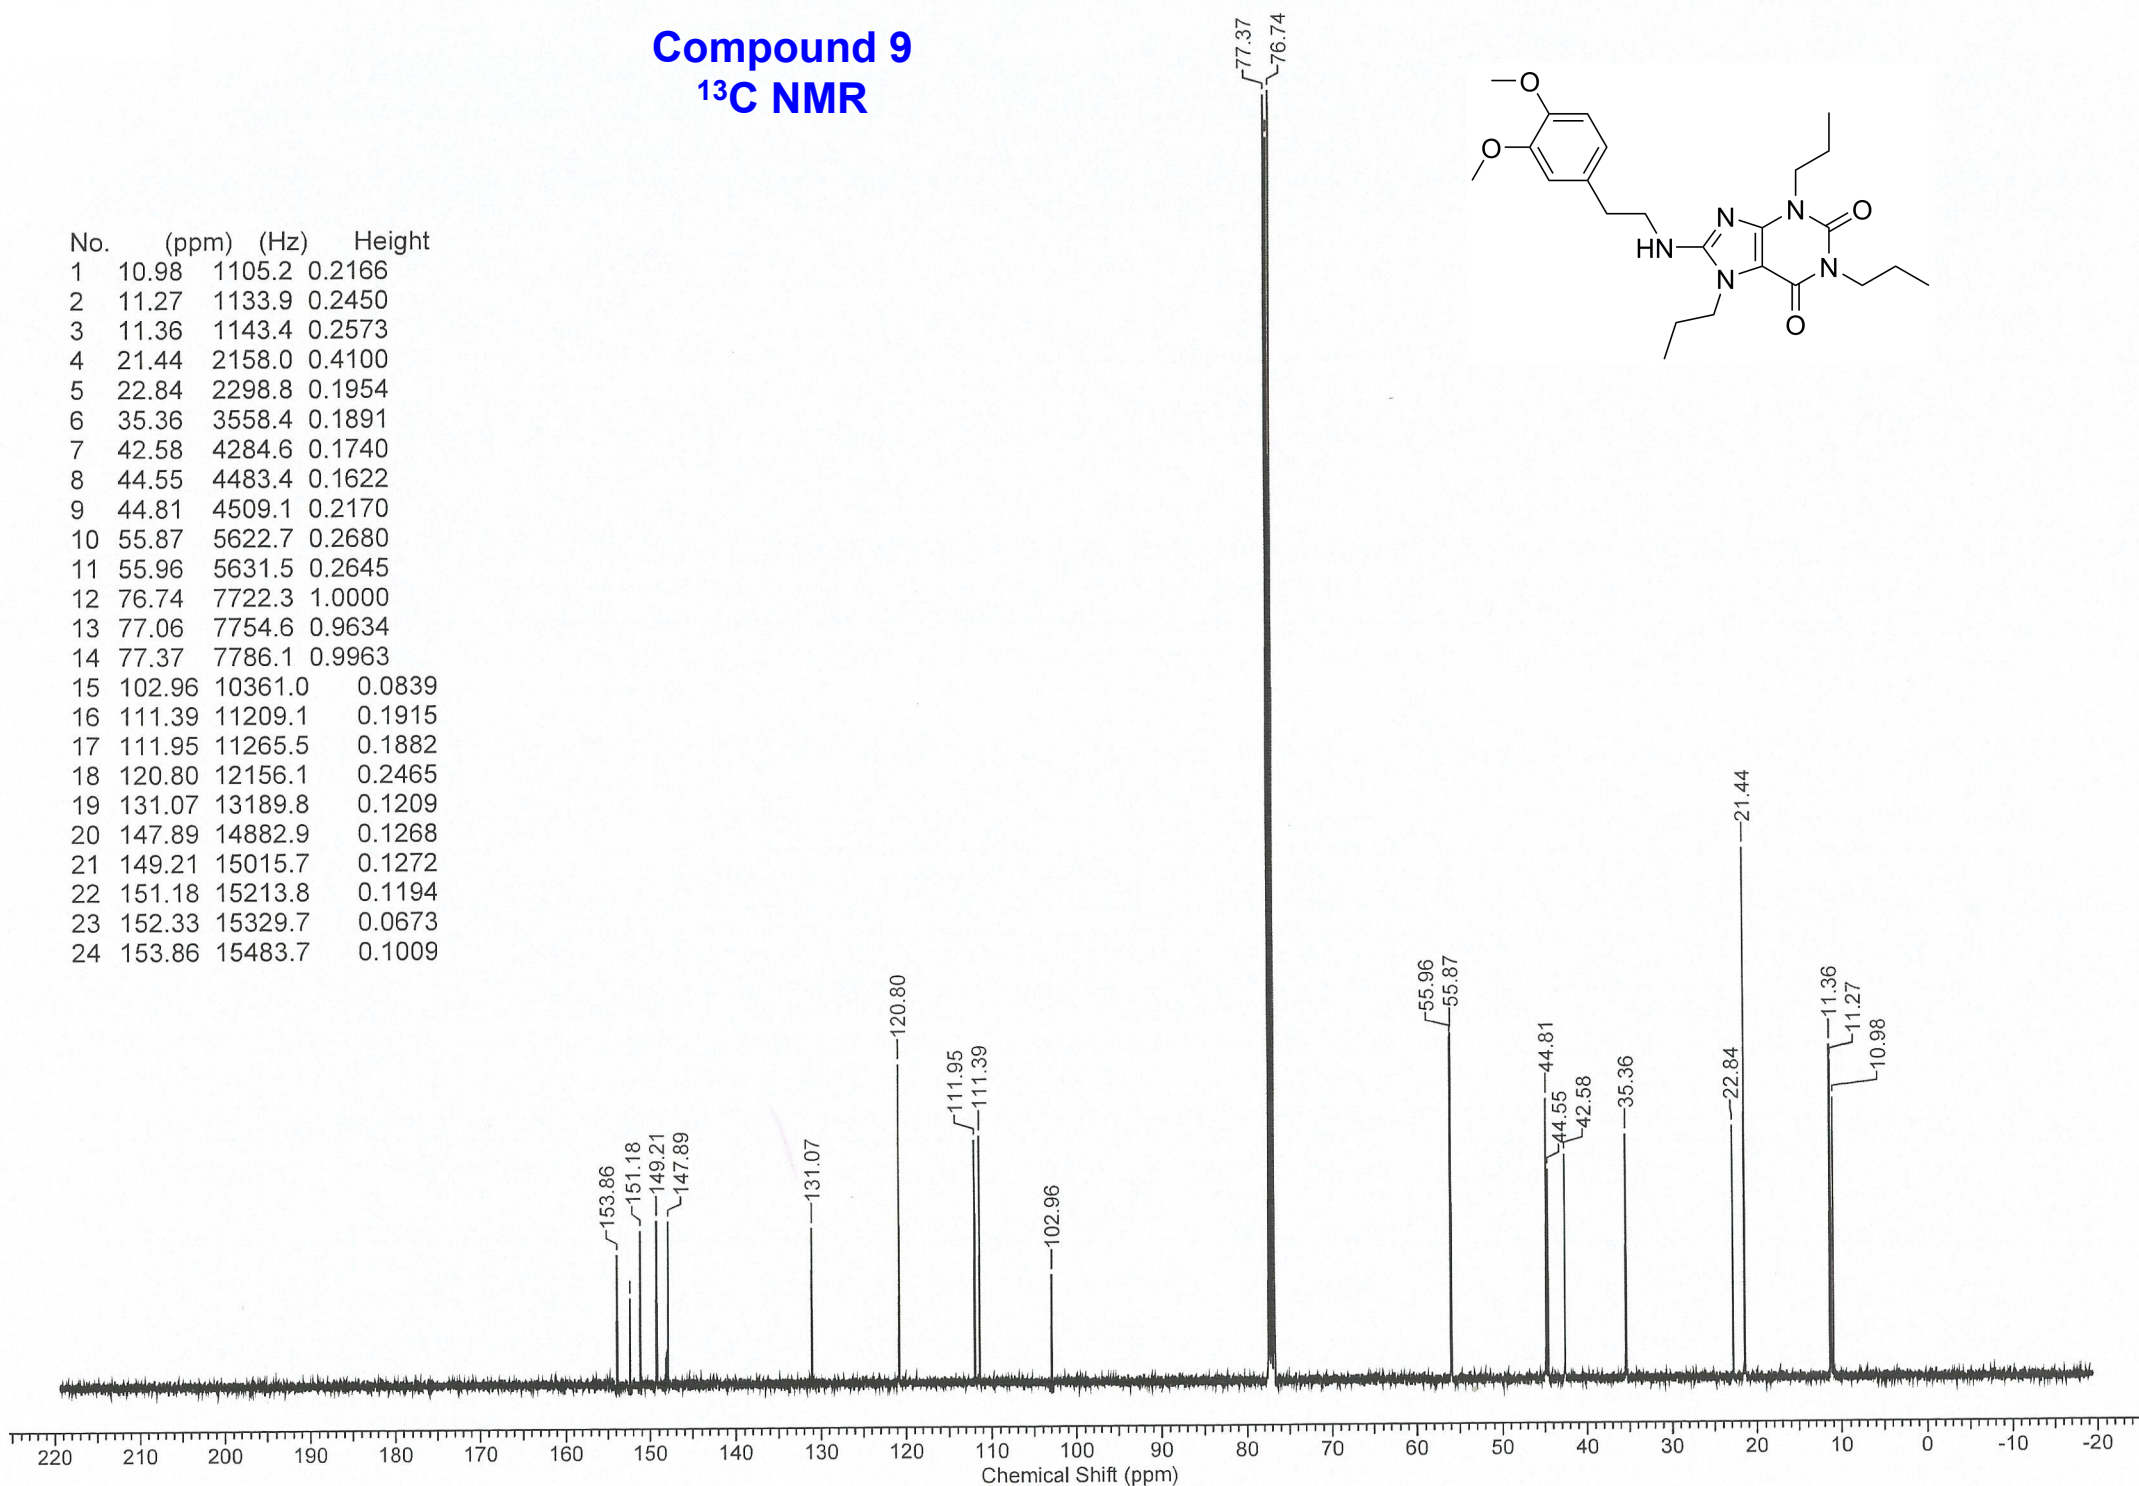

**Compound 10**  
 **$^1\text{H}$  NMR - zoom of**  
**the aromatic region**

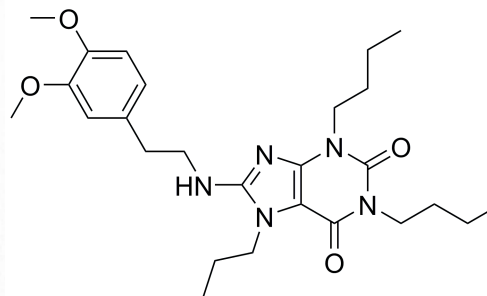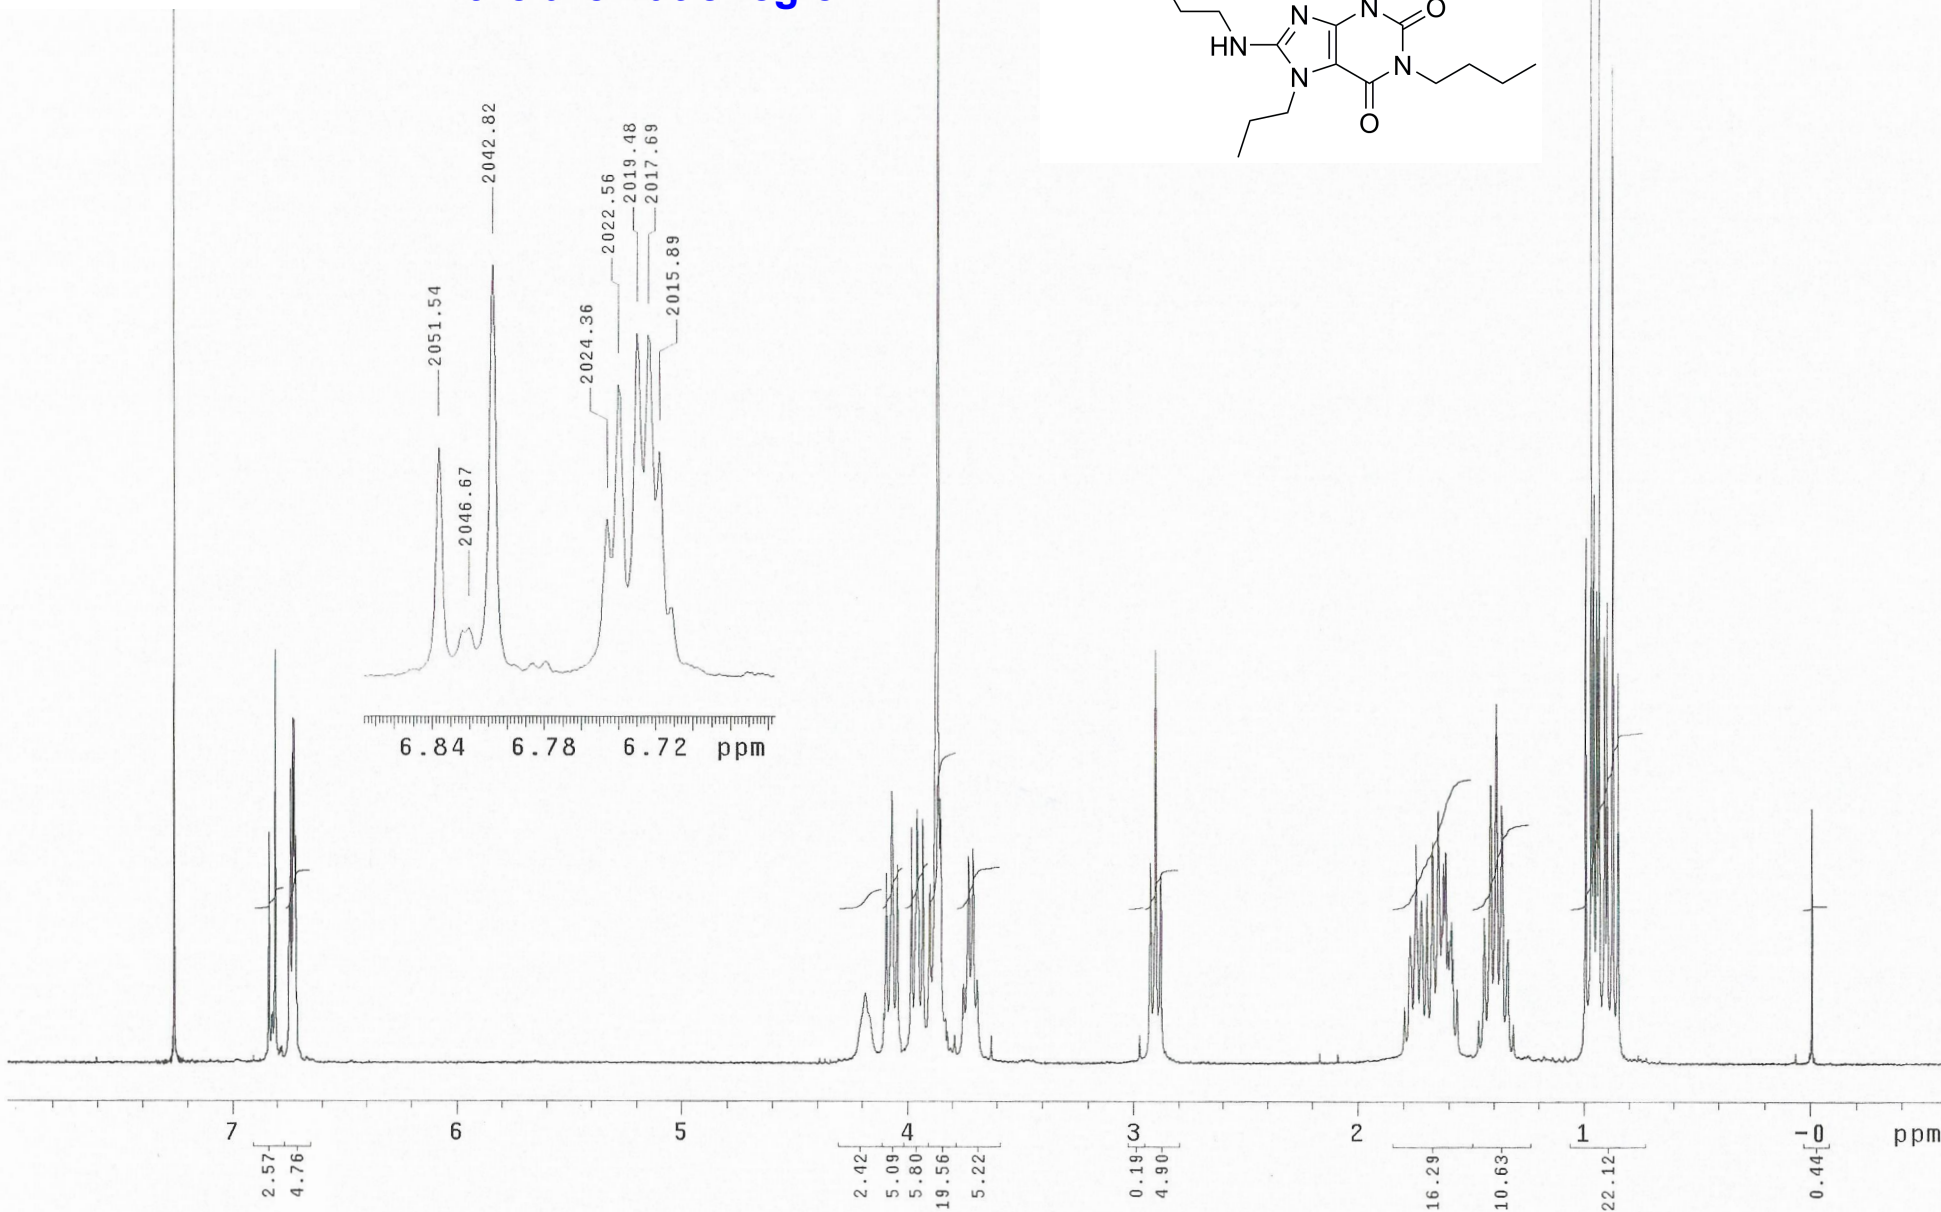

**Compound 10**  
 **$^1\text{H}$  NMR - zoom of the**  
**aliphatic region**

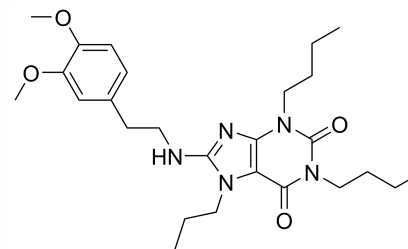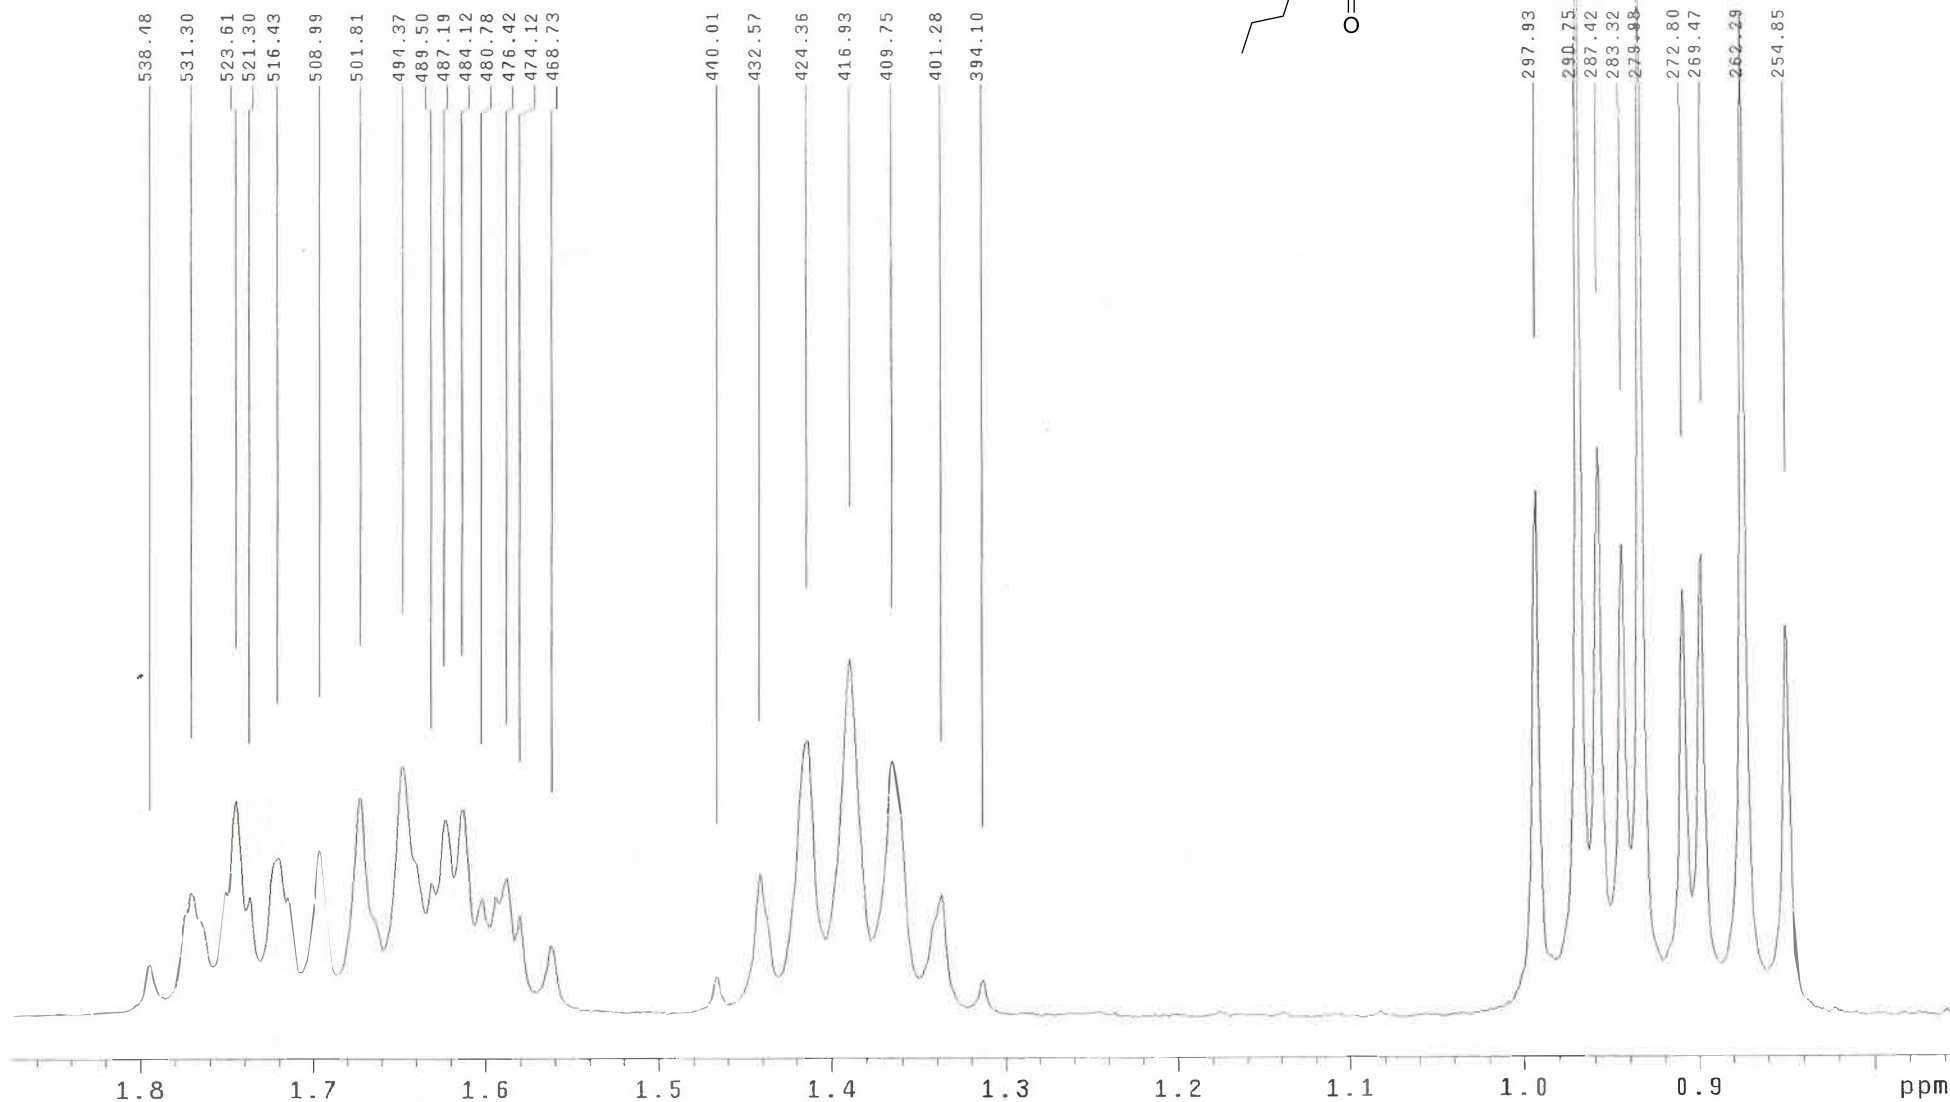

**Compound 10**  
 **$^1\text{H}$  NMR - zoom of the**  
**aliphatic region**

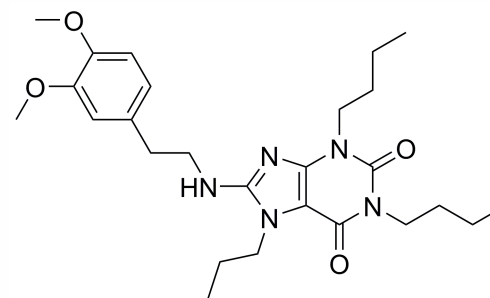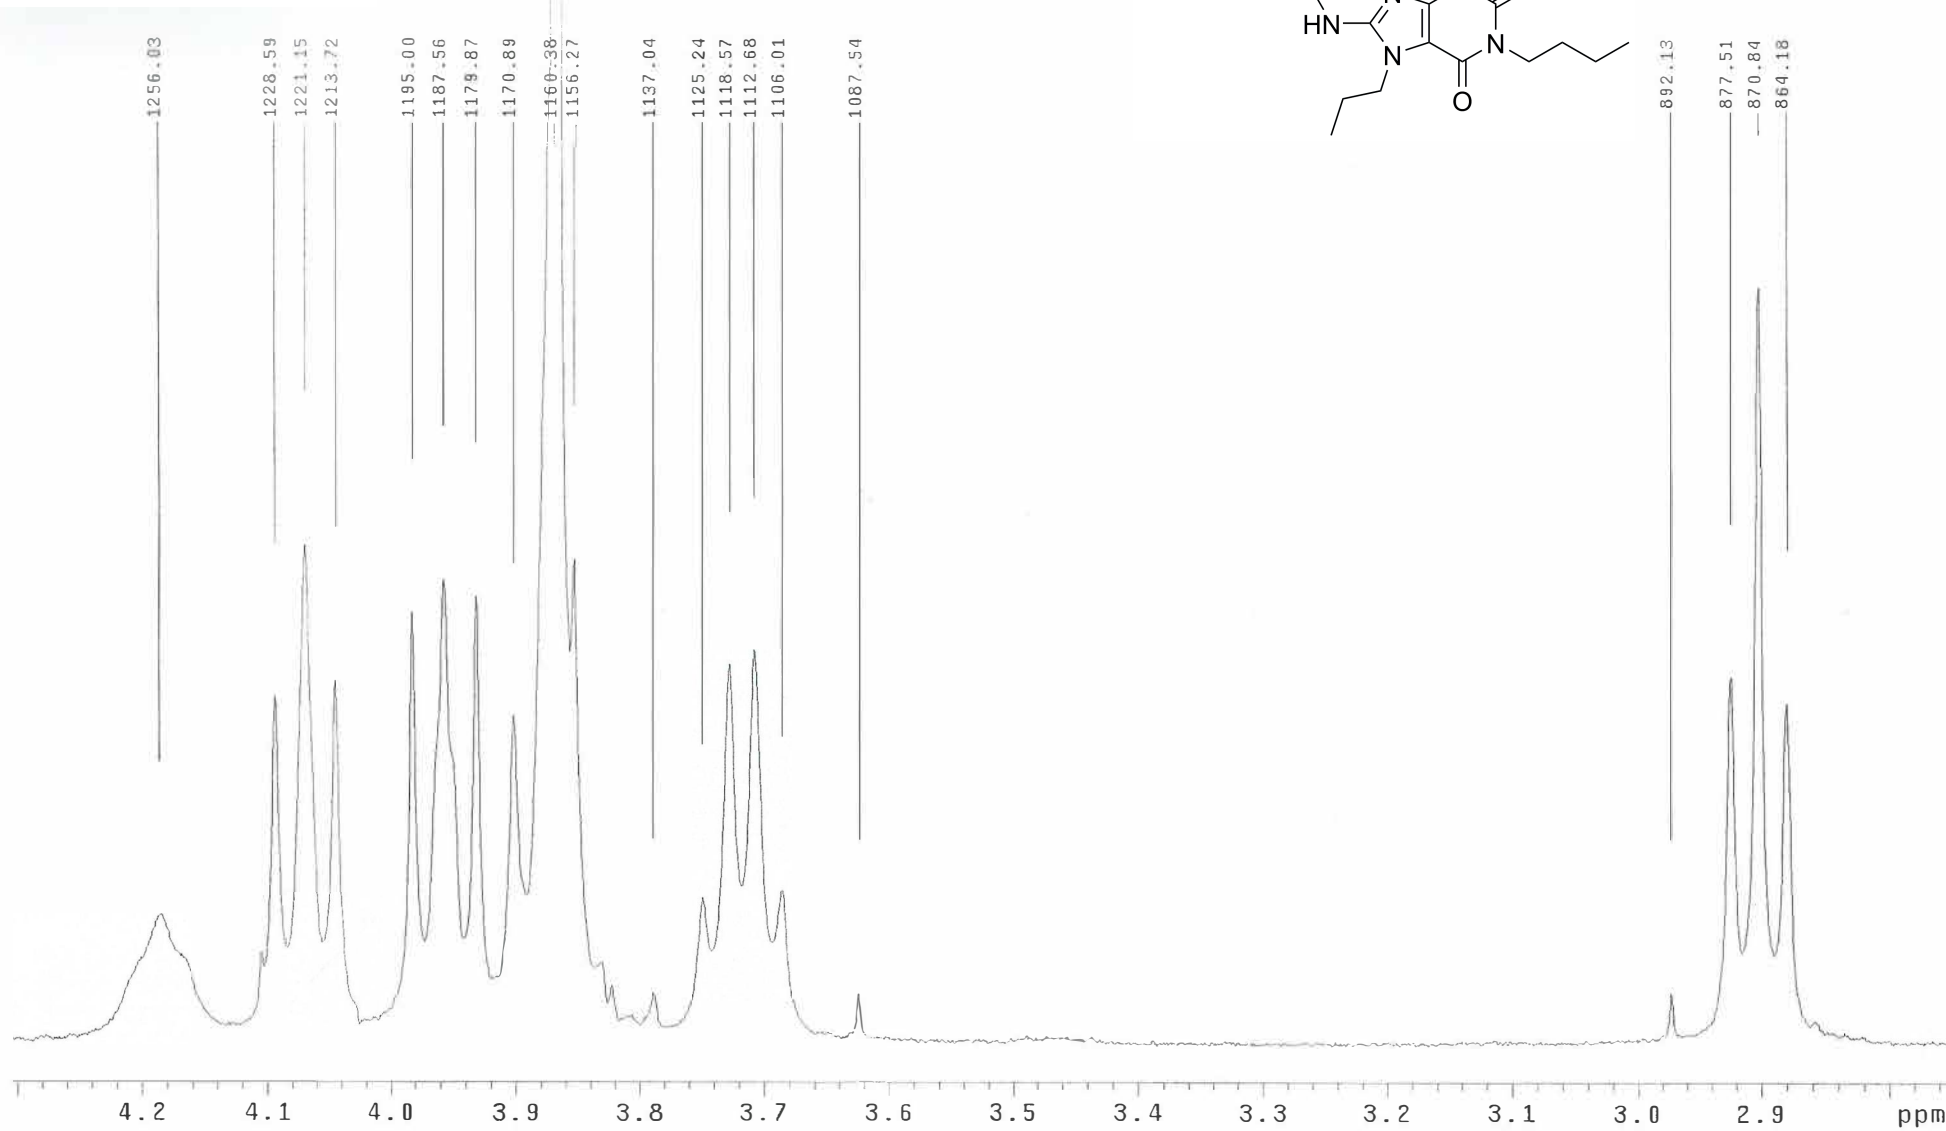

## Table of peaks

| INDEX | FREQUENCY | PPM   | HEIGHT | INDEX | FREQUENCY | PPM    | HEIGHT |
|-------|-----------|-------|--------|-------|-----------|--------|--------|
| 1     | 2180.535  | 7.267 | 2.5    | 40    | 538.484   | 1.794  | 7.4    |
| 2     | 2180.022  | 7.265 | 3.4    | 41    | 531.304   | 1.771  | 16.6   |
| 3     | 2179.509  | 7.263 | 4.7    | 42    | 525.405   | 1.751  | 16.7   |
| 4     | 2178.997  | 7.261 | 8.0    | 43    | 523.610   | 1.745  | 28.4   |
| 5     | 2177.971  | 7.258 | 139.3  | 44    | 521.302   | 1.737  | 16.0   |
| 6     | 2176.689  | 7.254 | 5.6    | 45    | 516.430   | 1.721  | 21.1   |
| 7     | 2176.176  | 7.252 | 3.1    | 46    | 514.635   | 1.715  | 16.0   |
| 8     | 2051.541  | 6.837 | 29.9   | 47    | 508.993   | 1.696  | 22.1   |
| 9     | 2046.668  | 6.820 | 6.5    | 48    | 501.812   | 1.672  | 28.8   |
| 10    | 2042.821  | 6.808 | 53.6   | 49    | 494.375   | 1.647  | 32.9   |
| 11    | 2024.357  | 6.746 | 20.7   | 50    | 489.502   | 1.631  | 17.9   |
| 12    | 2022.562  | 6.740 | 38.1   | 51    | 487.194   | 1.624  | 26.0   |
| 13    | 2019.485  | 6.730 | 44.7   | 52    | 484.117   | 1.613  | 27.4   |
| 14    | 2017.689  | 6.724 | 44.5   | 53    | 480.783   | 1.602  | 15.8   |
| 15    | 2015.894  | 6.718 | 29.4   | 54    | 478.475   | 1.594  | 16.0   |
| 16    | 2013.843  | 6.711 | 9.2    | 55    | 476.423   | 1.588  | 18.4   |
| 17    | 1256.032  | 4.186 | 9.1    | 56    | 474.115   | 1.580  | 13.6   |
| 18    | 1231.669  | 4.104 | 6.5    | 57    | 468.730   | 1.562  | 9.6    |
| 19    | 1228.592  | 4.094 | 24.6   | 58    | 440.008   | 1.466  | 5.6    |
| 20    | 1221.155  | 4.069 | 35.3   | 59    | 432.570   | 1.442  | 18.9   |
| 21    | 1213.718  | 4.045 | 25.7   | 60    | 424.364   | 1.414  | 36.2   |
| 22    | 1194.997  | 3.982 | 30.5   | 61    | 416.927   | 1.389  | 46.7   |
| 23    | 1187.560  | 3.957 | 32.9   | 62    | 409.746   | 1.365  | 33.5   |
| 24    | 1179.866  | 3.932 | 31.7   | 63    | 401.284   | 1.337  | 16.2   |
| 25    | 1170.891  | 3.902 | 23.2   | 64    | 394.103   | 1.313  | 5.1    |
| 26    | 1160.376  | 3.867 | 682.1  | 65    | 297.934   | 0.993  | 68.3   |
| 27    | 1156.273  | 3.853 | 34.3   | 66    | 290.753   | 0.969  | 146.2  |
| 28    | 1149.349  | 3.830 | 5.8    | 67    | 287.420   | 0.958  | 74.0   |
| 29    | 1147.041  | 3.822 | 4.1    | 68    | 283.316   | 0.944  | 61.5   |
| 30    | 1137.039  | 3.789 | 3.6    | 69    | 279.983   | 0.933  | 141.0  |
| 31    | 1125.243  | 3.750 | 10.3   | 70    | 272.802   | 0.909  | 55.4   |
| 32    | 1118.575  | 3.728 | 26.8   | 71    | 269.468   | 0.898  | 60.0   |
| 33    | 1112.676  | 3.708 | 27.9   | 72    | 262.287   | 0.874  | 129.7  |
| 34    | 1106.009  | 3.686 | 10.8   | 73    | 254.850   | 0.849  | 50.8   |
| 35    | 1087.544  | 3.624 | 3.6    | 74    | -2.369    | -0.008 | 33.0   |
| 36    | 892.129   | 2.973 | 3.7    |       |           |        |        |
| 37    | 877.512   | 2.924 | 26.0   |       |           |        |        |
| 38    | 870.844   | 2.902 | 53.7   |       |           |        |        |
| 39    | 864.176   | 2.880 | 24.2   |       |           |        |        |

# Compound 10 <sup>13</sup>C NMR

| No. | (ppm)  | (Hz)    | Height |
|-----|--------|---------|--------|
| 1   | 10.99  | 1106.0  | 0.3240 |
| 2   | 13.82  | 1390.6  | 0.3496 |
| 3   | 13.85  | 1393.5  | 0.4031 |
| 4   | 20.01  | 2013.4  | 0.3322 |
| 5   | 20.33  | 2045.7  | 0.3007 |
| 6   | 22.85  | 2299.5  | 0.2810 |
| 7   | 30.21  | 3040.5  | 0.2939 |
| 8   | 30.31  | 3050.0  | 0.3083 |
| 9   | 35.36  | 3558.4  | 0.2392 |
| 10  | 40.94  | 4119.6  | 0.2108 |
| 11  | 43.05  | 4332.3  | 0.2029 |
| 12  | 44.54  | 4482.0  | 0.2417 |
| 13  | 44.77  | 4505.5  | 0.2001 |
| 14  | 55.86  | 5621.3  | 0.3328 |
| 15  | 55.96  | 5631.5  | 0.3430 |
| 16  | 76.74  | 7722.3  | 0.9906 |
| 17  | 77.05  | 7753.8  | 0.9913 |
| 18  | 77.37  | 7786.1  | 1.0000 |
| 19  | 103.00 | 10365.4 | 0.1196 |
| 20  | 111.39 | 11209.8 | 0.2564 |
| 21  | 111.93 | 11263.3 | 0.2450 |
| 22  | 120.79 | 12155.4 | 0.2770 |
| 23  | 131.08 | 13191.2 | 0.1820 |
| 24  | 147.89 | 14882.9 | 0.1445 |
| 25  | 148.20 | 14913.7 | 0.0471 |
| 26  | 149.21 | 15015.7 | 0.1473 |
| 27  | 151.16 | 15211.6 | 0.1359 |
| 28  | 152.38 | 15334.1 | 0.1266 |
| 29  | 153.85 | 15482.2 | 0.1282 |

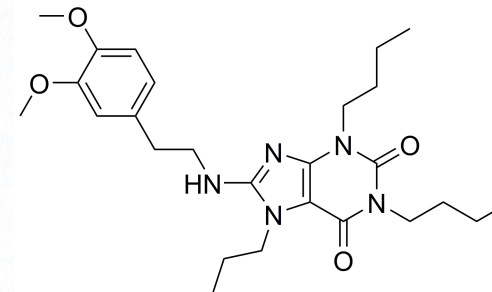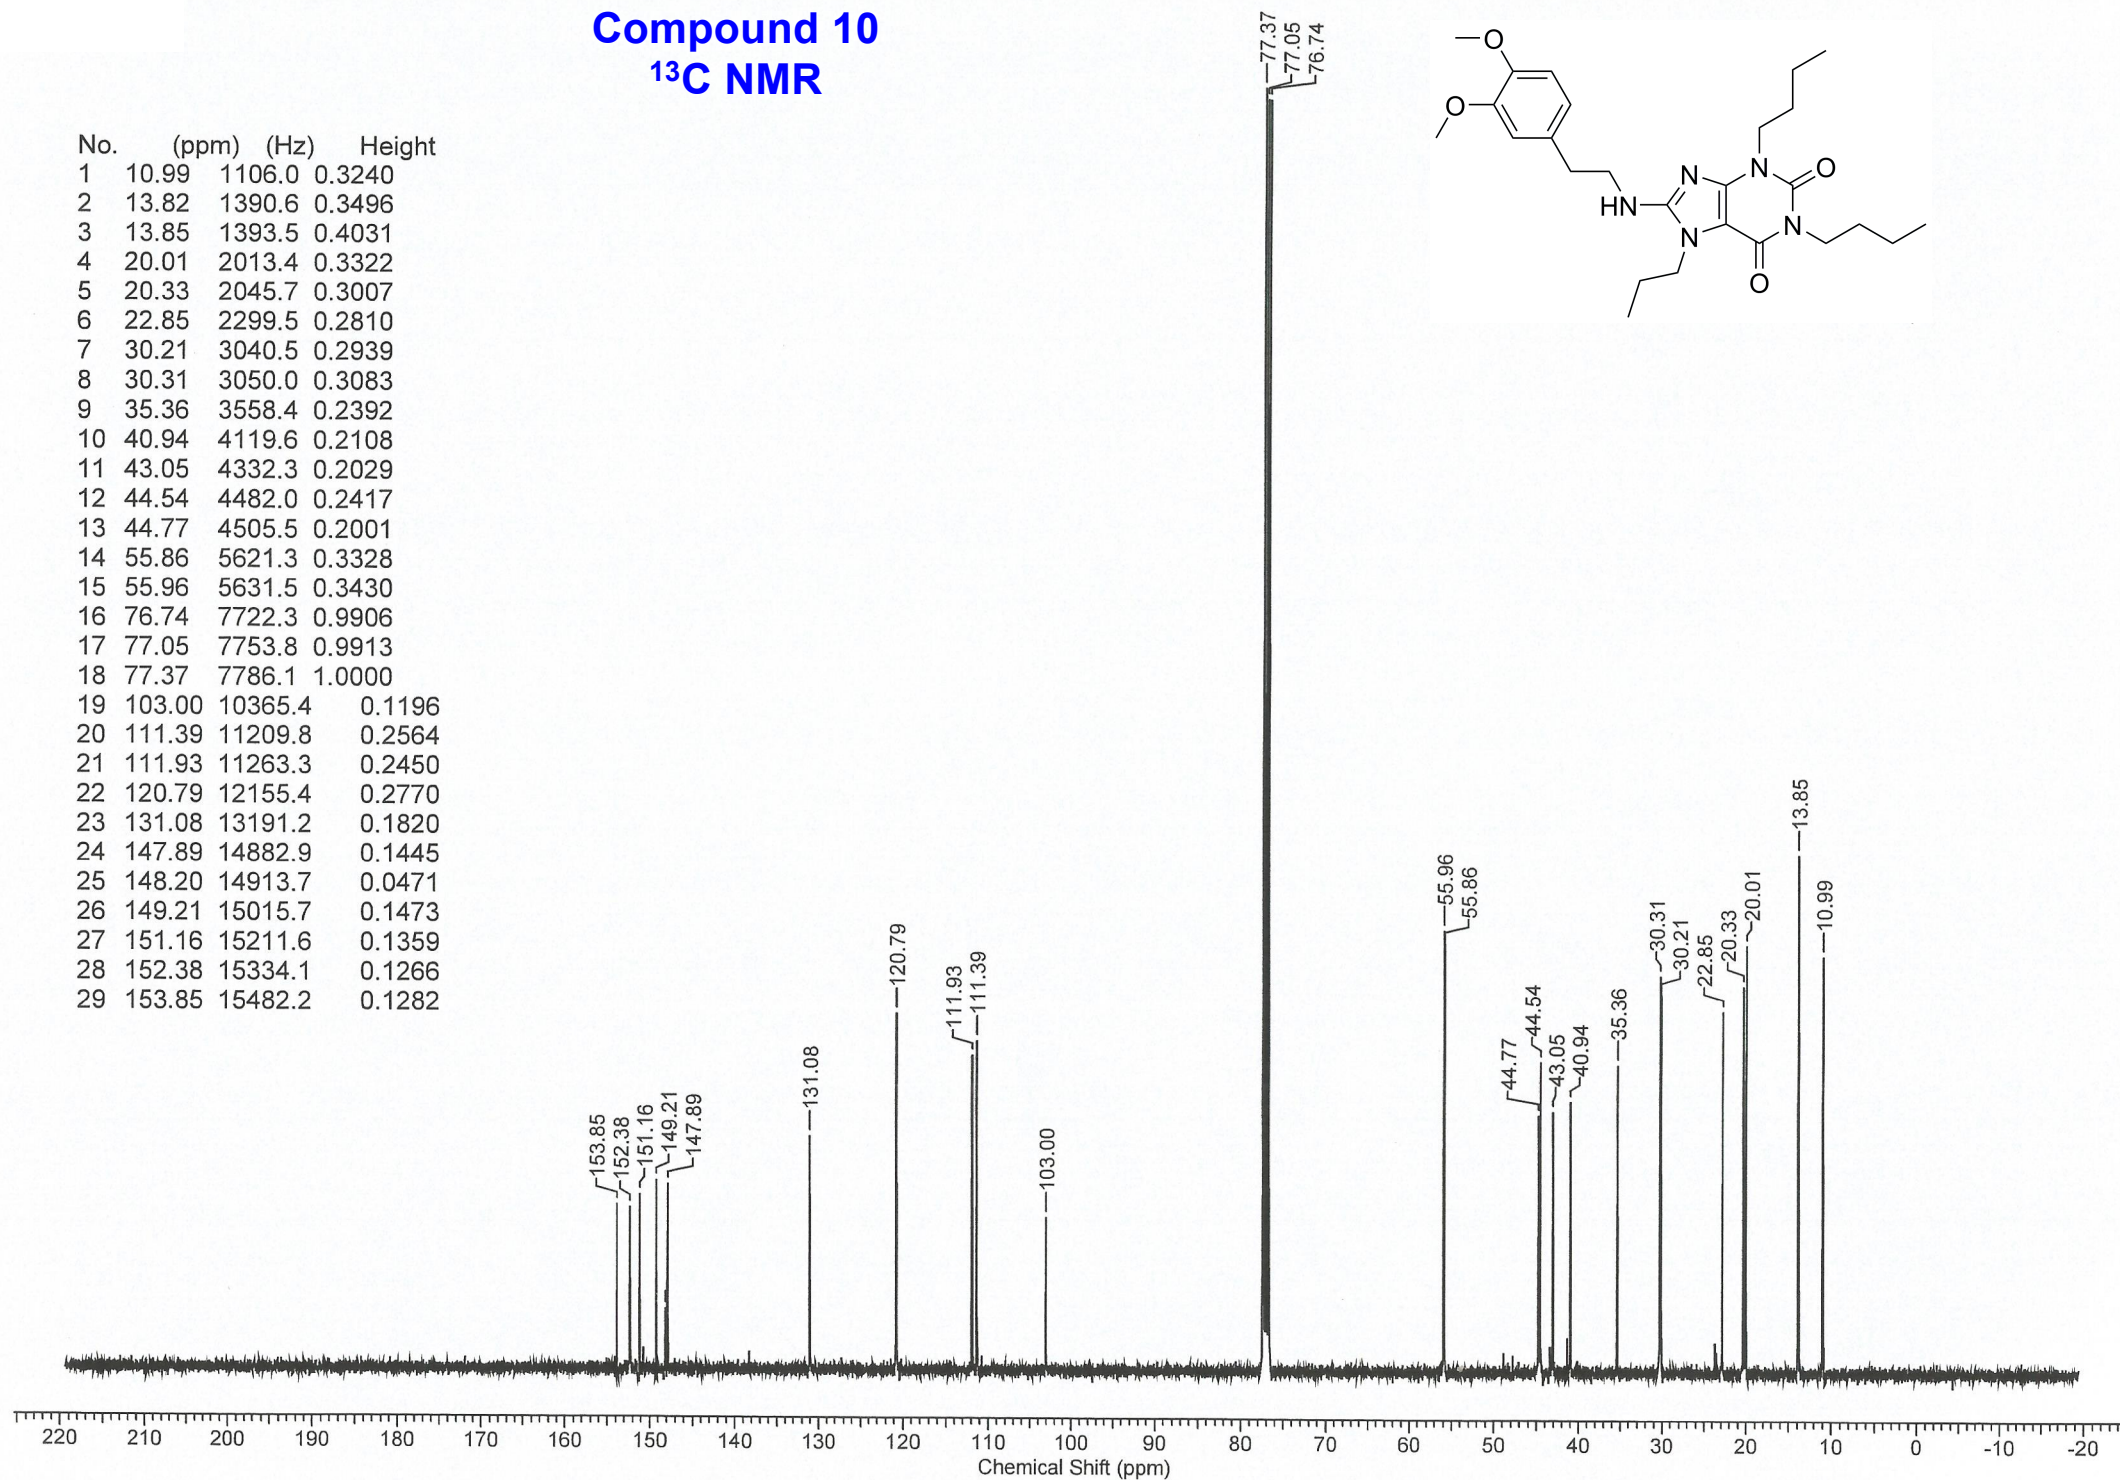

**Compound 17b**  
 **$^1\text{H}$  NMR - zoom of the**  
**aromatic region**

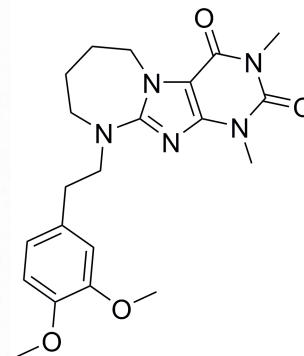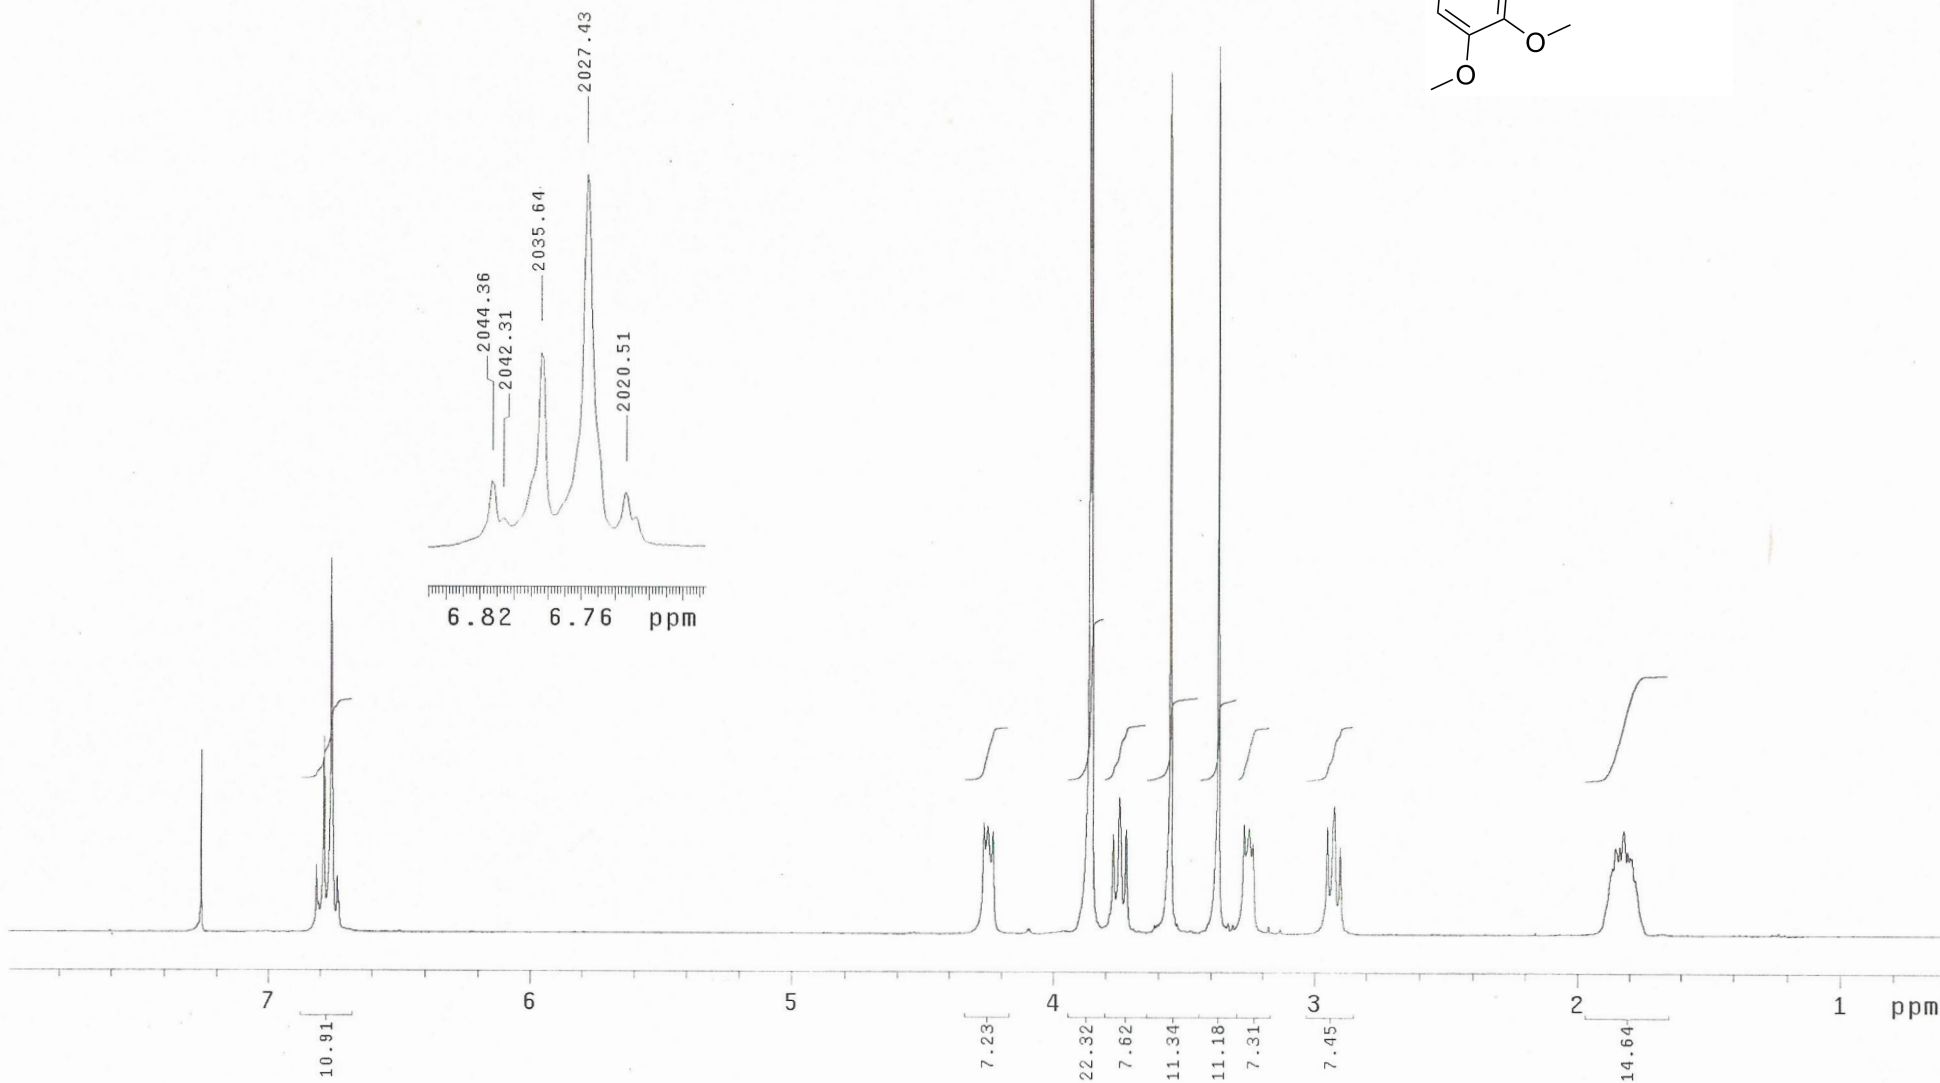

**Compound 17b**  
**<sup>1</sup>H NMR - zoom of the**  
**aliphatic region**

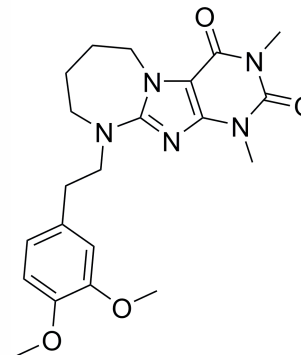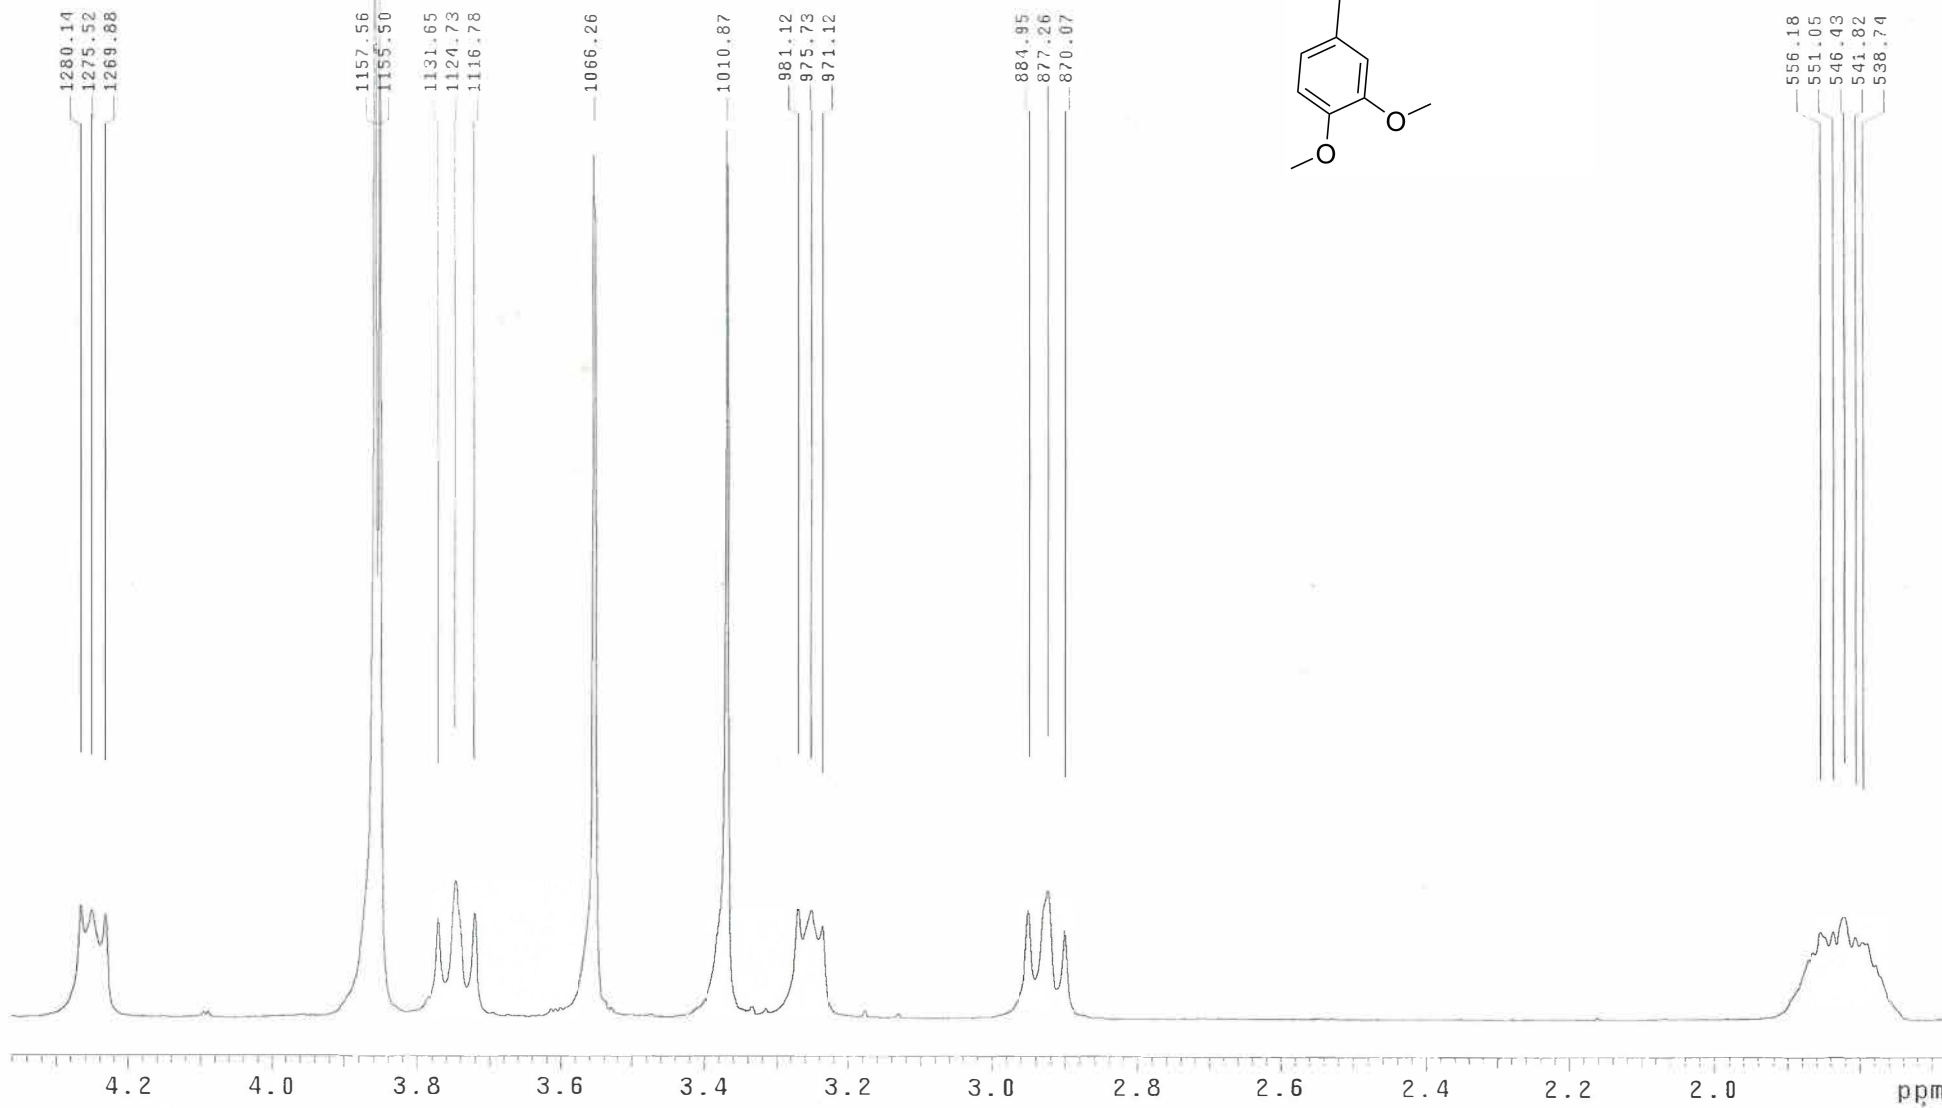

## Table of peaks

| INDEX | FREQUENCY | PPM   | HEIGHT |
|-------|-----------|-------|--------|
| 1     | 2177.971  | 7.258 | 23.5   |
| 2     | 2044.360  | 6.813 | 8.7    |
| 3     | 2042.309  | 6.806 | 3.9    |
| 4     | 2035.641  | 6.784 | 25.4   |
| 5     | 2027.434  | 6.756 | 48.6   |
| 6     | 2020.510  | 6.733 | 7.2    |
| 7     | 2018.715  | 6.727 | 4.0    |
| 8     | 1280.138  | 4.266 | 14.4   |
| 9     | 1275.522  | 4.251 | 13.9   |
| 10    | 1269.880  | 4.232 | 13.3   |
| 11    | 1157.555  | 3.858 | 144.0  |
| 12    | 1155.504  | 3.851 | 136.7  |
| 13    | 1131.654  | 3.771 | 13.0   |
| 14    | 1124.730  | 3.748 | 17.8   |
| 15    | 1116.780  | 3.722 | 13.5   |
| 16    | 1066.259  | 3.553 | 111.9  |
| 17    | 1010.866  | 3.369 | 115.3  |
| 18    | 981.118   | 3.270 | 14.3   |
| 19    | 975.732   | 3.252 | 13.8   |
| 20    | 971.116   | 3.236 | 11.9   |
| 21    | 884.949   | 2.949 | 14.0   |
| 22    | 877.255   | 2.923 | 16.7   |
| 23    | 870.075   | 2.899 | 11.3   |
| 24    | 559.257   | 1.864 | 8.7    |
| 25    | 556.179   | 1.853 | 11.3   |
| 26    | 551.050   | 1.836 | 11.4   |
| 27    | 546.434   | 1.821 | 13.5   |
| 28    | 541.818   | 1.806 | 10.7   |
| 29    | 538.741   | 1.795 | 10.1   |
| 30    | 536.946   | 1.789 | 10.0   |
| 31    | 533.355   | 1.777 | 7.2    |

# Compound 17b

## <sup>13</sup>C NMR

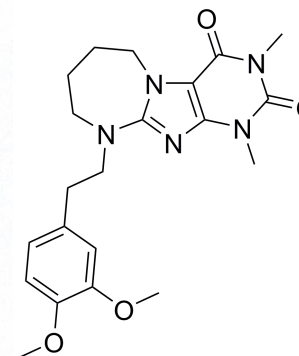

| No. | (ppm)  | (Hz)    | Height |
|-----|--------|---------|--------|
| 1   | 26.35  | 2651.7  | 0.2729 |
| 2   | 27.70  | 2787.4  | 0.2879 |
| 3   | 28.99  | 2917.2  | 0.2495 |
| 4   | 29.69  | 2987.6  | 0.2747 |
| 5   | 33.89  | 3410.2  | 0.2470 |
| 6   | 45.84  | 4612.6  | 0.2132 |
| 7   | 52.32  | 5265.5  | 0.2289 |
| 8   | 55.19  | 5553.8  | 0.2580 |
| 9   | 55.86  | 5621.3  | 0.2970 |
| 10  | 55.92  | 5627.9  | 0.2851 |
| 11  | 76.74  | 7722.3  | 0.9482 |
| 12  | 77.05  | 7753.8  | 1.0000 |
| 13  | 77.37  | 7786.1  | 0.9748 |
| 14  | 104.12 | 10477.7 | 0.1115 |
| 15  | 111.27 | 11197.3 | 0.2228 |
| 16  | 112.02 | 11272.9 | 0.2285 |
| 17  | 120.79 | 12155.4 | 0.3095 |
| 18  | 131.75 | 13258.0 | 0.2146 |
| 19  | 147.62 | 14855.0 | 0.1311 |
| 20  | 148.02 | 14895.4 | 0.0871 |
| 21  | 148.93 | 14987.1 | 0.1410 |
| 22  | 151.79 | 15275.4 | 0.1210 |
| 23  | 154.40 | 15538.0 | 0.1132 |
| 24  | 158.65 | 15965.0 | 0.1345 |

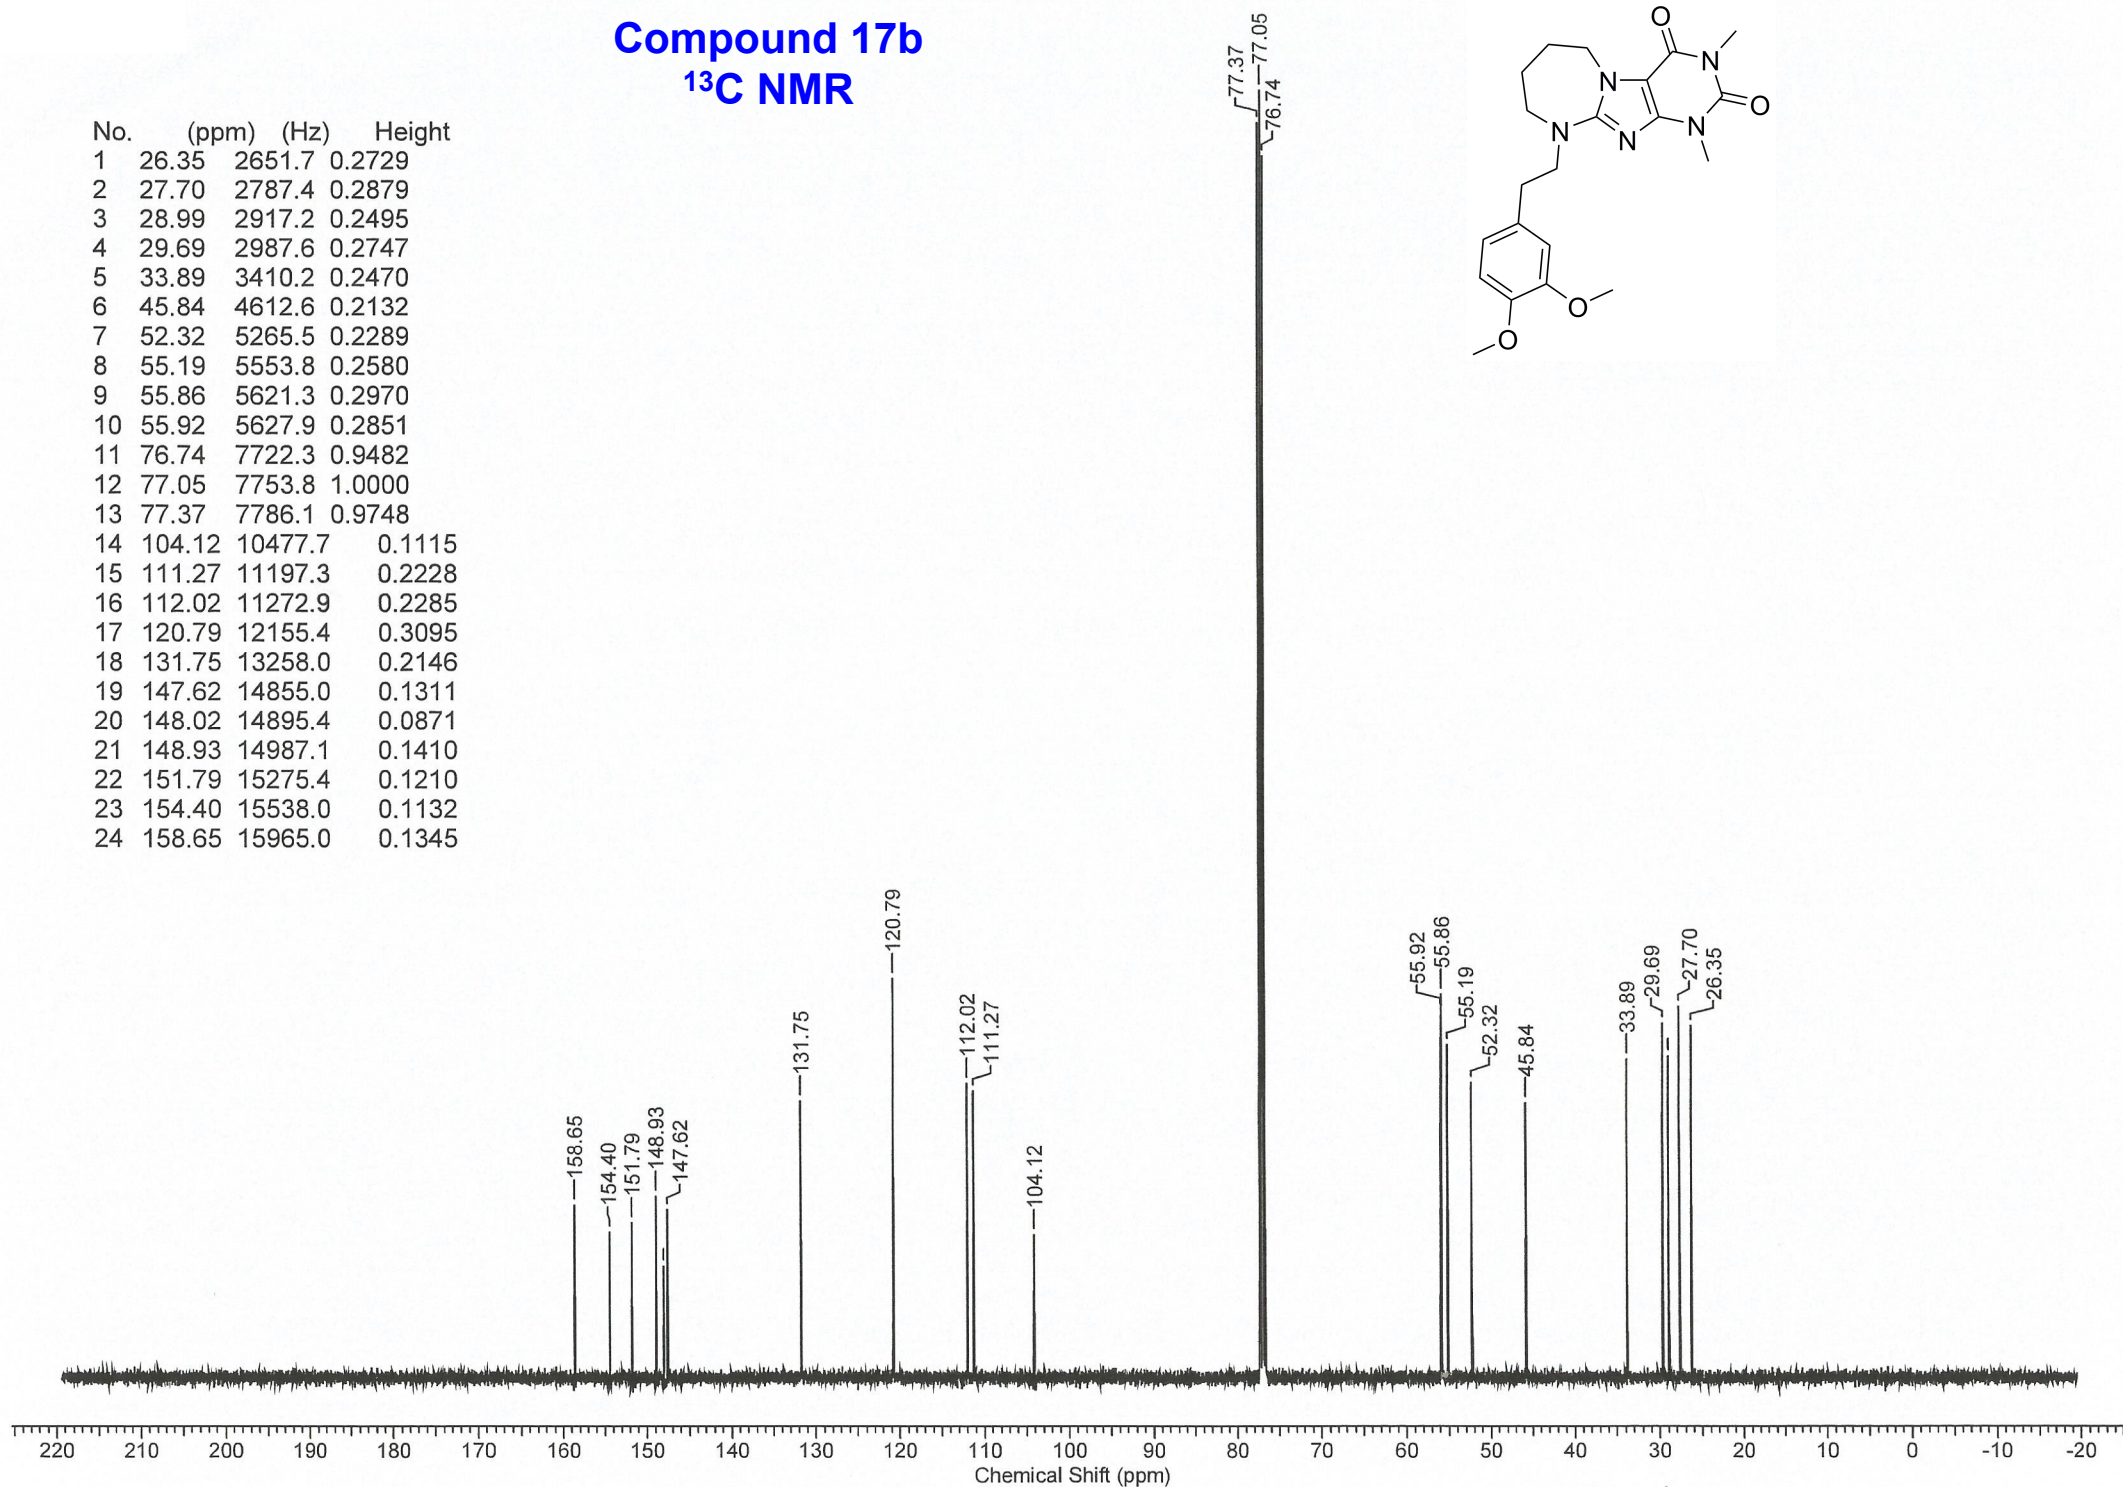

**Compound 19**  
**<sup>1</sup>H NMR**

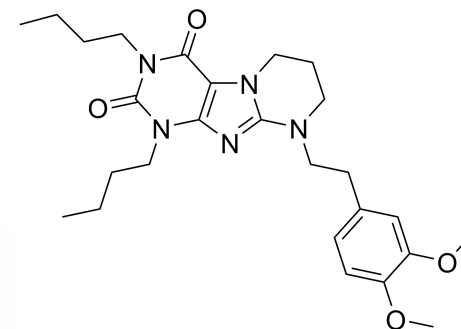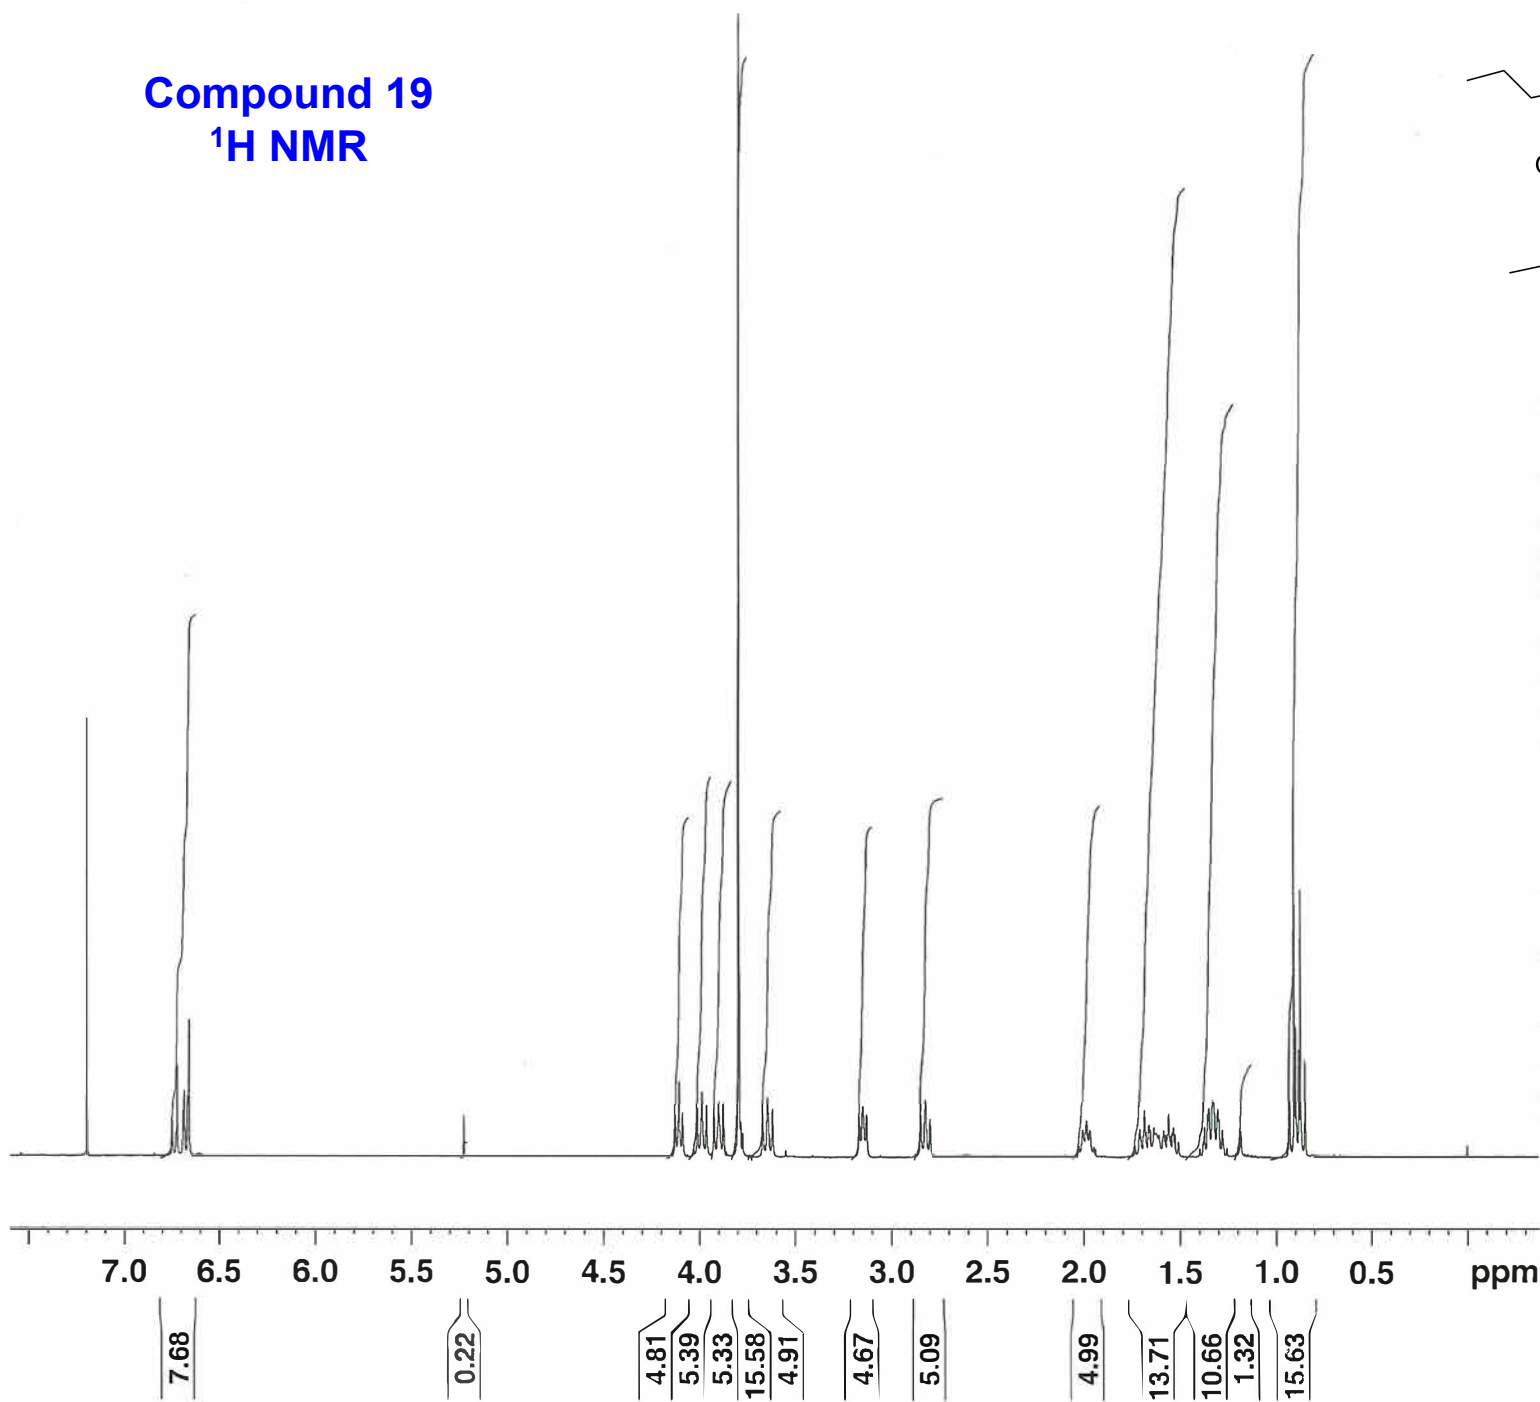

Sample for 6.08, 6.10, 6.11, THPX

**Compound 19**  
 **$^1\text{H}$  NMR - zoom of the**  
**aliphatic region**

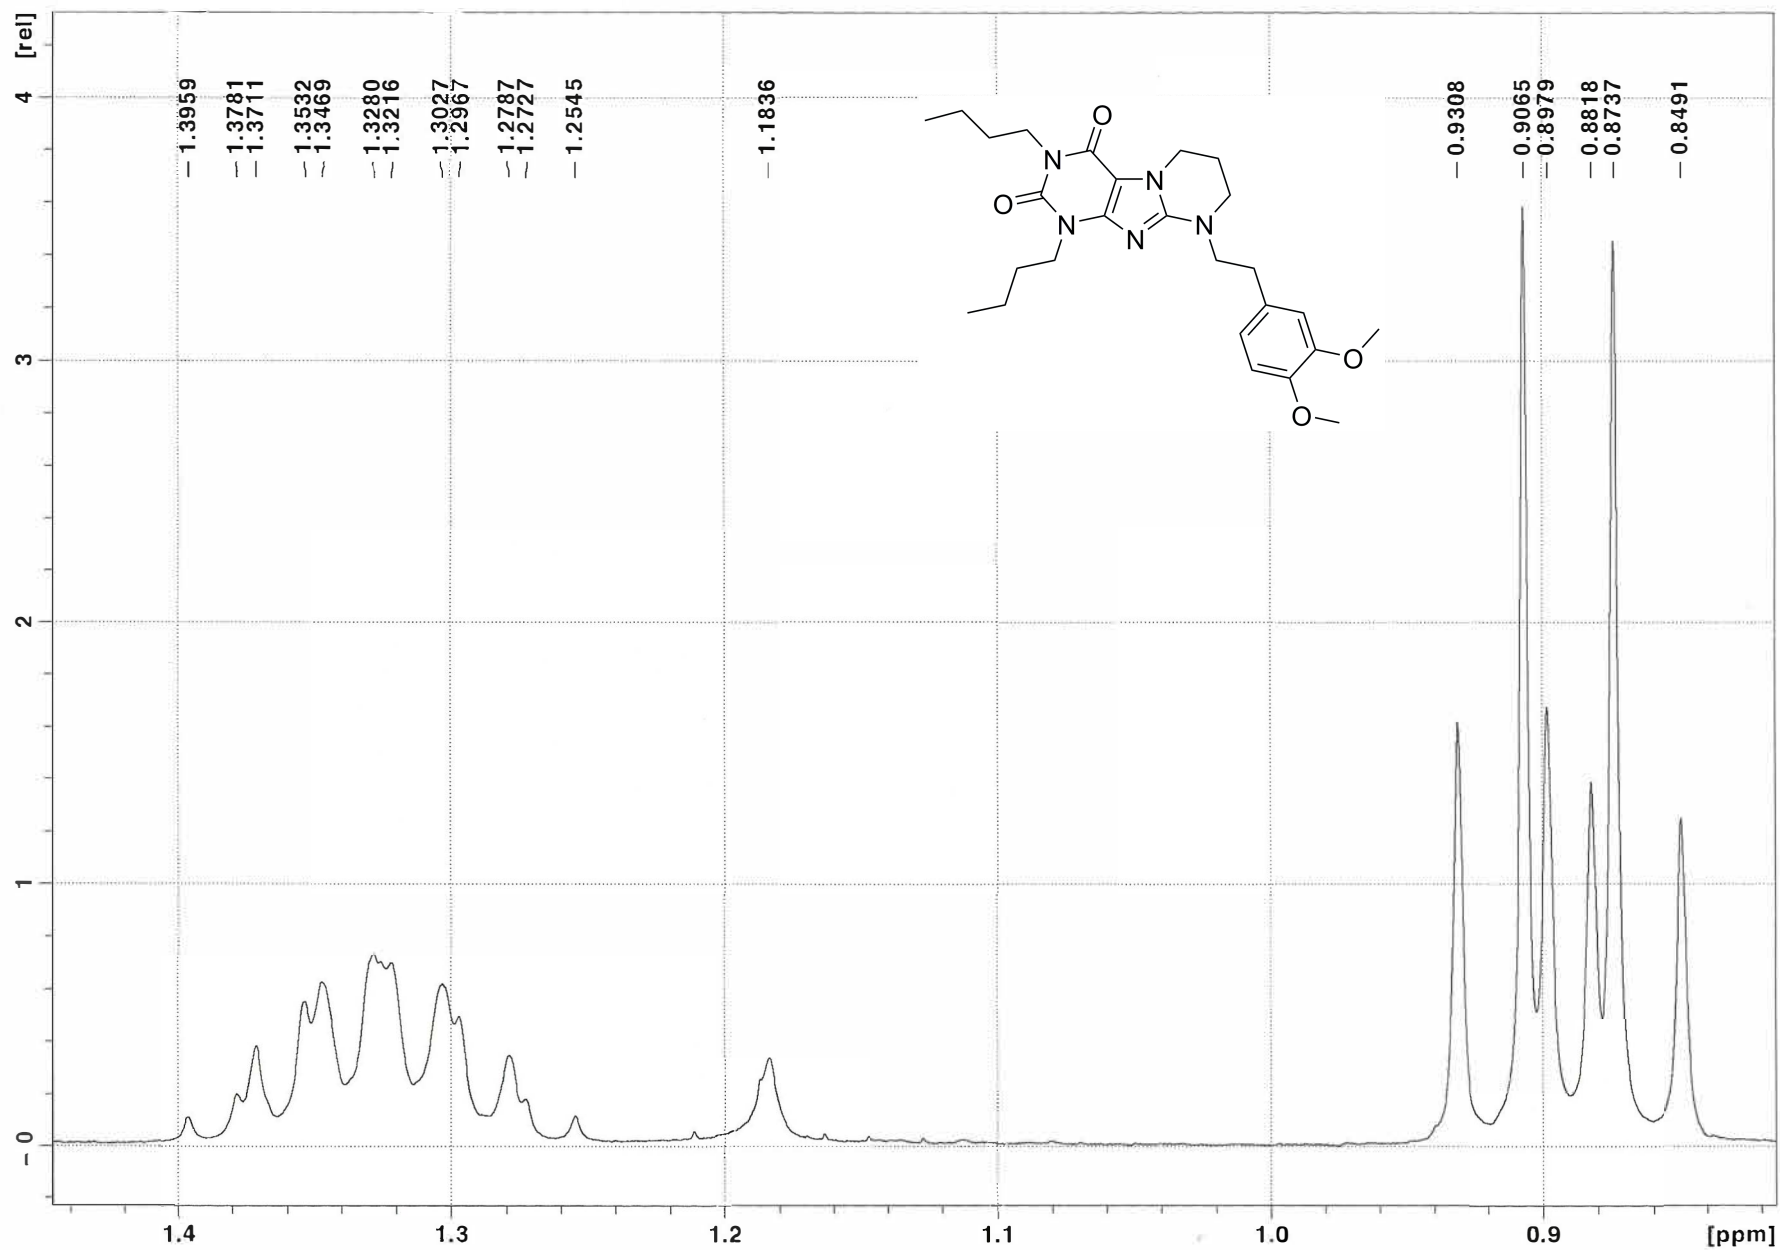

**Compound 19**  
 **$^1\text{H}$  NMR - zoom of the**  
**aliphatic region**

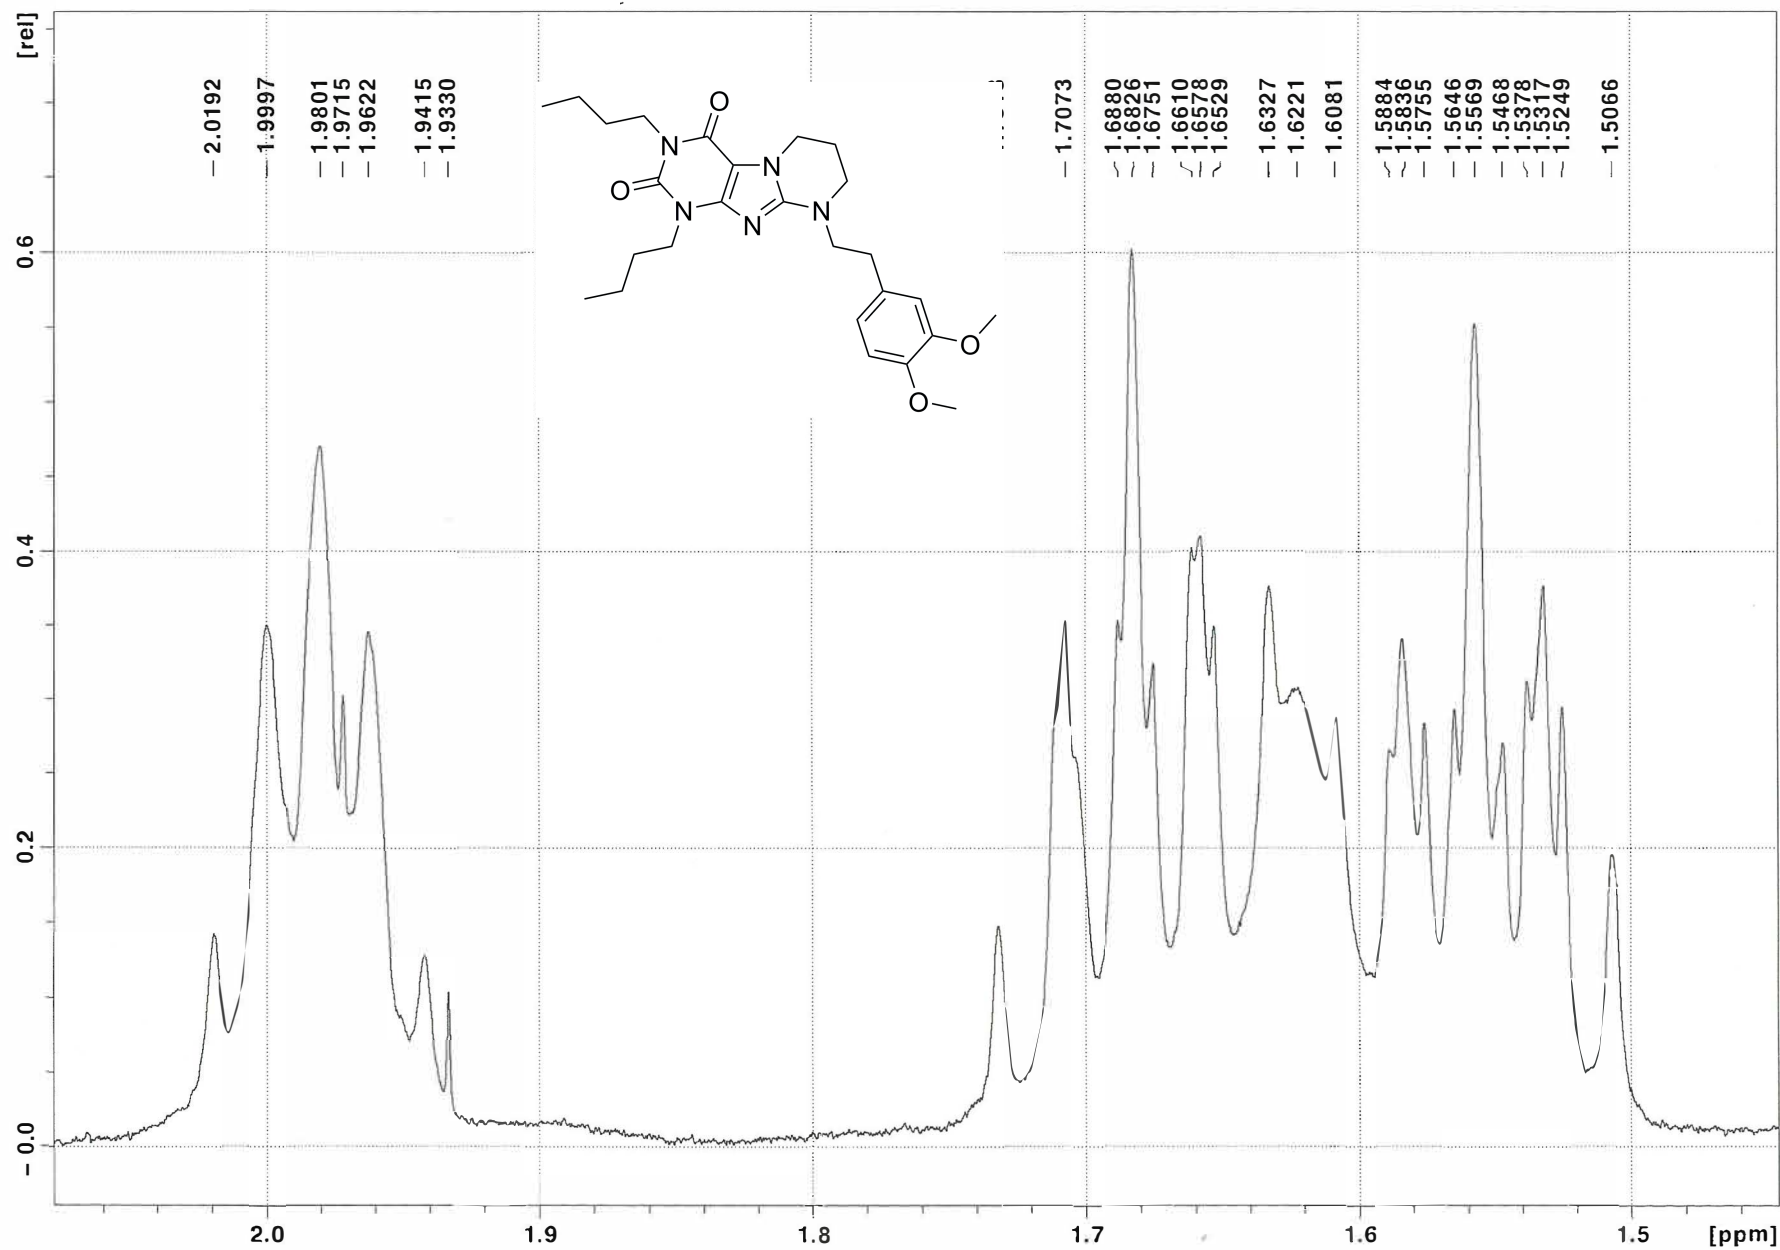

Compound 19  
<sup>1</sup>H NMR - zoom of the  
aliphatic region

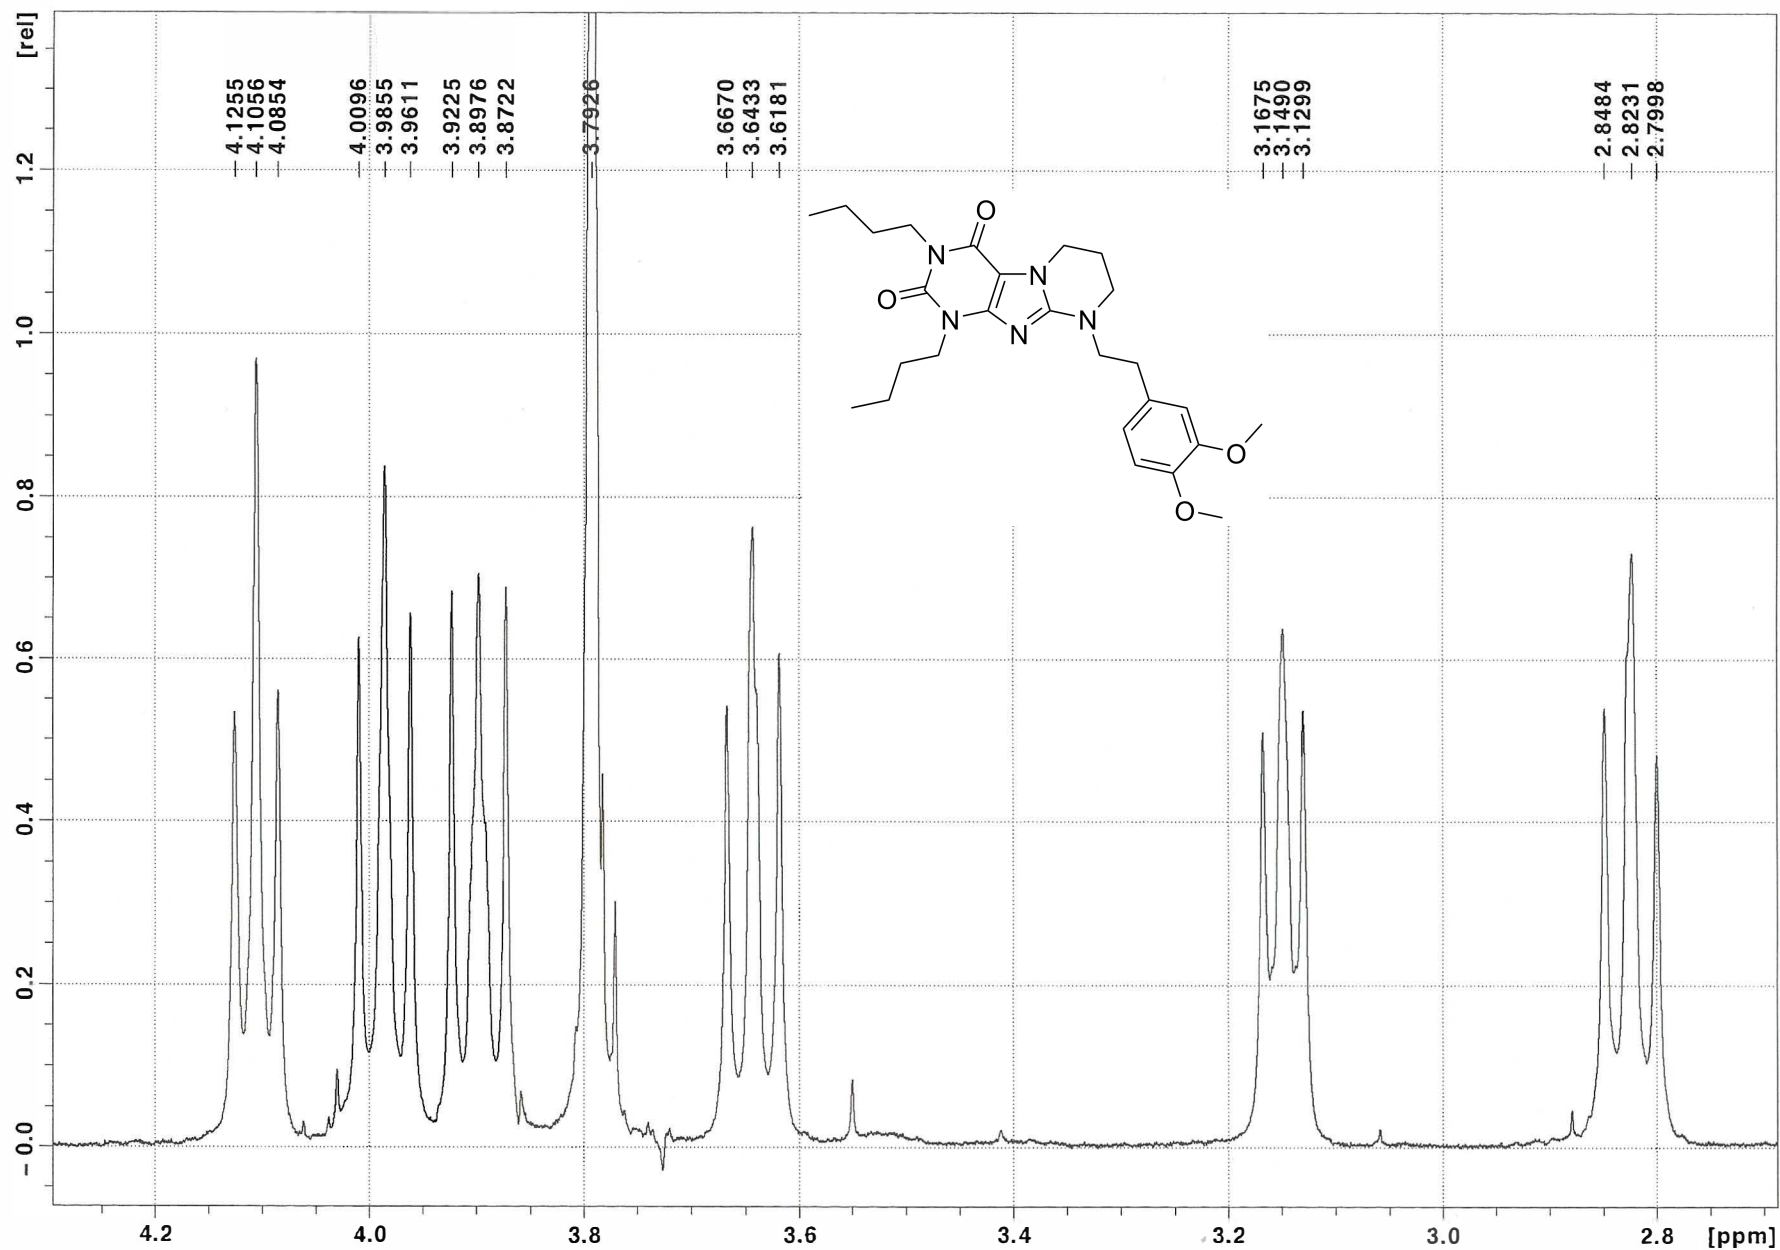

**Compound 19**  
 **$^1\text{H}$  NMR - zoom of the**  
**aromatic region**

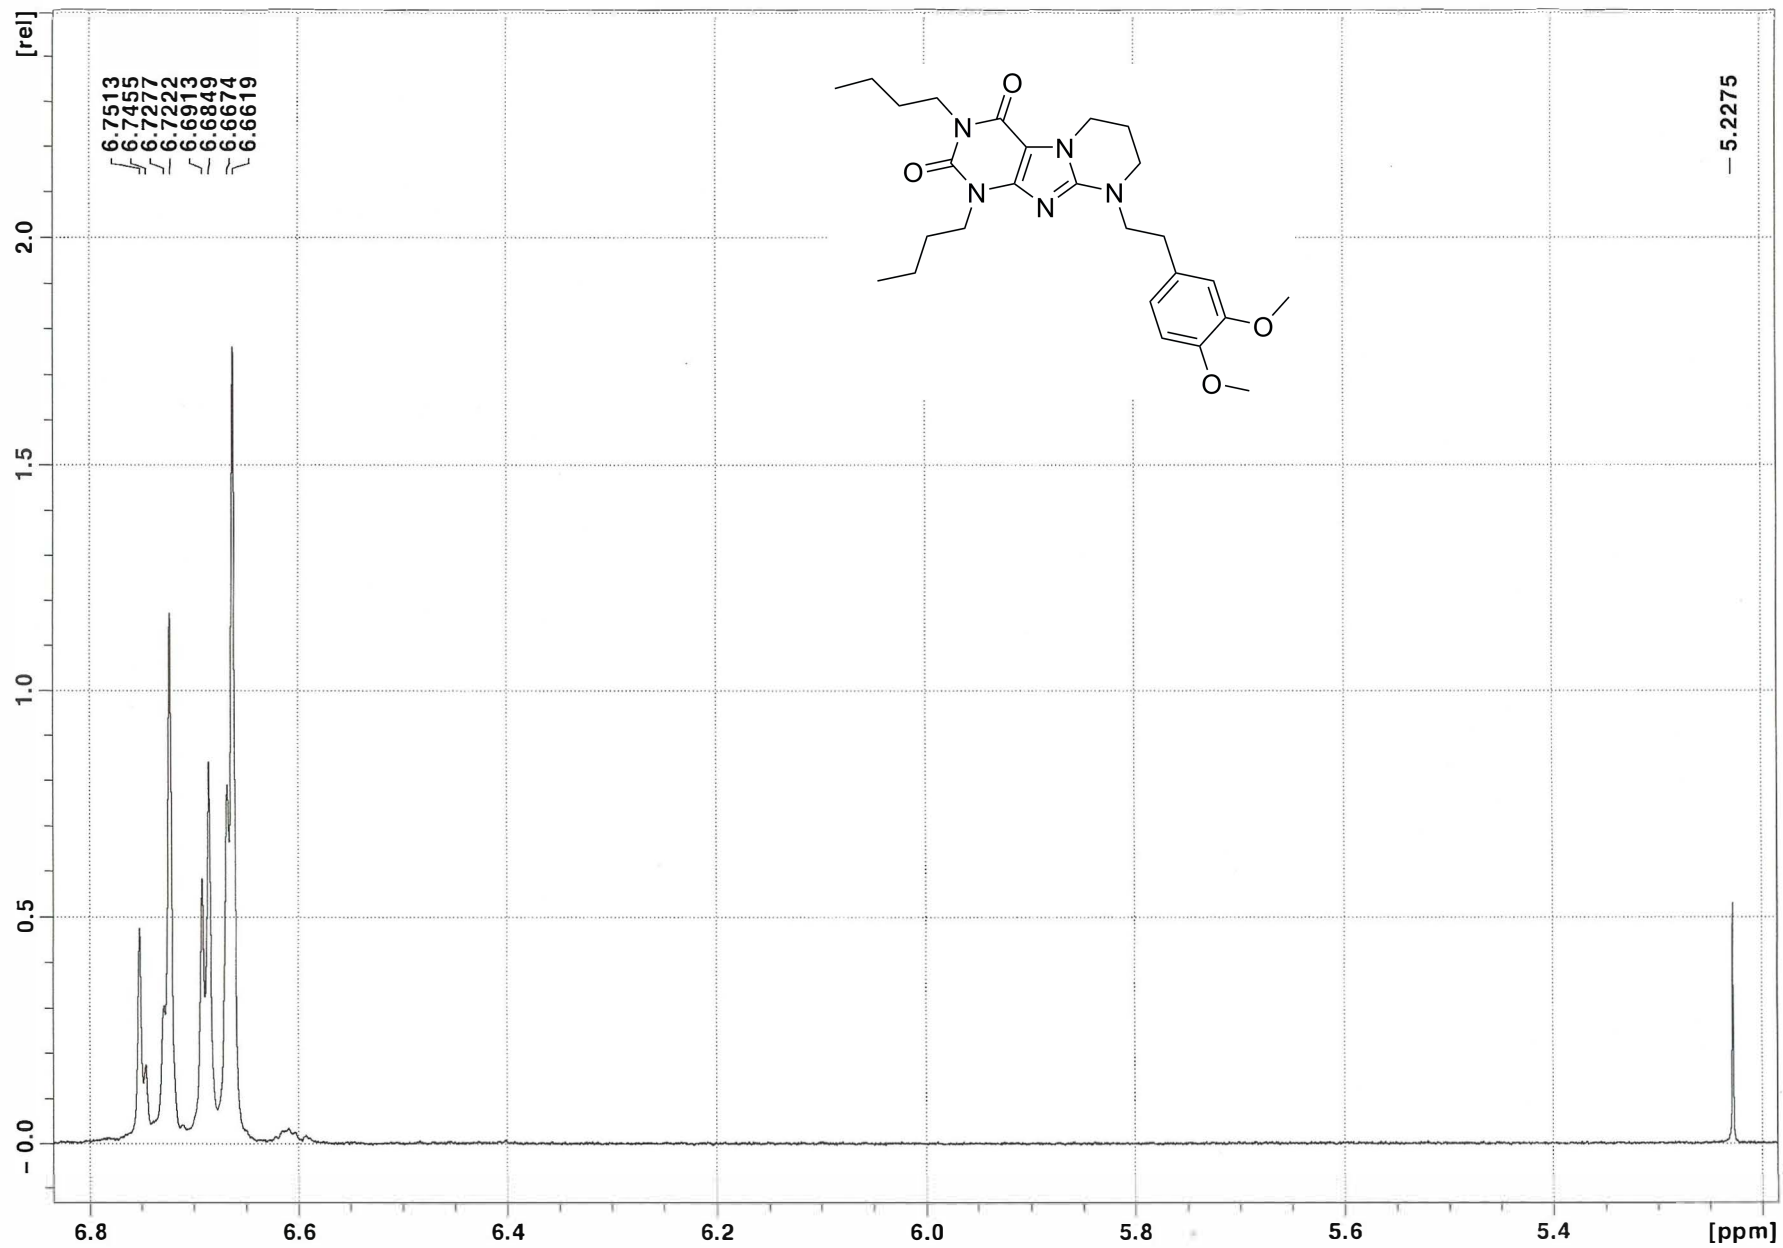

## Table of peaks

| Peak | v(F1) [ppm] | v(F1) [Hz]       | Intensity |
|------|-------------|------------------|-----------|
| 1    | 7.1972      | 2160.0958        | 5.74      |
| 2    | 6.7513      | 2026.2678        | 0.47      |
| 3    | 6.7455      | 2024.5271        | 0.17      |
| 4    | 6.7277      | 2019.1848        | 0.30      |
| 5    | 6.7222      | 2017.5341        | 1.18      |
| 6    | 6.6913      | 2008.2600        | 0.58      |
| 7    | 6.6849      | 2006.3392        | 0.84      |
| 8    | 6.6674      | 2001.0869        | 0.79      |
| 9    | 6.6619      | 1999.4362        | 1.76      |
| 10   | 5.2275      | 1568.9297        | 0.53      |
| 11   | 4.1255      | 1238.1864        | 0.53      |
| 12   | 4.1056      | 1232.2138        | 0.97      |
| 13   | 4.0854      | 1226.1512        | 0.56      |
| 14   | 4.0096      | 1203.4013        | 0.63      |
| 15   | 3.9855      | 1196.1682        | 0.84      |
| 16   | 3.9611      | 1188.8450        | 0.66      |
| 17   | 3.9225      | 1177.2600        | 0.69      |
| 18   | 3.8976      | 1169.7868        | 0.71      |
| 19   | 3.8722      | 1162.1635        | 0.69      |
| 20   | 3.7926      | 1138.2731        | 15.00     |
| 21   | 3.6670      | 1100.5768        | 0.54      |
| 22   | 3.6433      | <b>1093.4637</b> | 0.76      |
| 23   | 3.6181      | 1085.9004        | 0.61      |
| 24   | 3.1675      | 950.6619         | 0.51      |
| 25   | 3.1490      | 945.1094         | 0.64      |
| 26   | 3.1299      | 939.3770         | 0.54      |
| 27   | 2.8484      | 854.8904         | 0.54      |
| 28   | 2.8231      | 847.2971         | 0.73      |
| 29   | 2.7998      | 840.3040         | 0.48      |
| 30   | 2.0192      | 606.0225         | 0.14      |
| 31   | 1.9997      | 600.1700         | 0.35      |
| 32   | 1.9801      | 594.2875         | 0.47      |
| 33   | 1.9715      | 591.7063         | 0.30      |
| 34   | 1.9622      | 588.9151         | 0.35      |
| 35   | 1.9415      | 582.7024         | 0.13      |
| 36   | 1.9330      | 580.1513         | 0.10      |
| 37   | 1.7318      | 519.7652         | 0.15      |
| 38   | 1.7073      | 512.4120         | 0.35      |
| 39   | 1.6880      | 506.6195         | 0.35      |
| 40   | 1.6826      | 504.9988         | 0.60      |
| 41   | 1.6751      | 502.7478         | 0.32      |
| 42   | 1.6610      | 498.5160         | 0.40      |
| 43   | 1.6578      | 497.5556         | 0.41      |
| 44   | 1.6529      | 496.0849         | 0.35      |
| 45   | 1.6327      | 490.0223         | 0.38      |

## Table of peaks

| Peak | $\nu(\text{F1})$ [ppm] | $\nu(\text{F1})$ [Hz] | Intensity |
|------|------------------------|-----------------------|-----------|
| 46   | 1.6221                 | 486.8409              | 0.31      |
| 47   | 1.6081                 | 482.6391              | 0.29      |
| 48   | 1.5884                 | 476.7265              | 0.27      |
| 49   | 1.5836                 | 475.2859              | 0.34      |
| 50   | 1.5755                 | 472.8549              | 0.28      |
| 51   | 1.5646                 | 469.5834              | 0.29      |
| 52   | 1.5569                 | 467.2724              | 0.55      |
| 53   | 1.5468                 | 464.2411              | 0.27      |
| 54   | 1.5378                 | 461.5400              | 0.31      |
| 55   | 1.5317                 | 459.7092              | 0.38      |
| 56   | 1.5249                 | 457.6683              | 0.29      |
| 57   | 1.5066                 | 452.1759              | 0.20      |
| 58   | 1.3959                 | 418.9515              | 0.11      |
| 59   | 1.3781                 | 413.6092              | 0.20      |
| 60   | 1.3711                 | 411.5083              | 0.38      |
| 61   | 1.3532                 | 406.1360              | 0.55      |
| 62   | 1.3469                 | 404.2451              | 0.63      |
| 63   | 1.3280                 | 398.5727              | 0.73      |
| 64   | 1.3216                 | 396.6518              | 0.70      |
| 65   | 1.3027                 | 390.9794              | 0.62      |
| 66   | 1.2967                 | 389.1786              | 0.49      |
| 67   | 1.2787                 | 383.7763              | 0.35      |
| 68   | 1.2727                 | 381.9755              | 0.18      |
| 69   | 1.2545                 | 376.5131              | 0.11      |
| 70   | 1.1836                 | 355.2339              | 0.34      |
| 71   | 0.9308                 | 279.3610              | 1.62      |
| 72   | 0.9065                 | 272.0679              | 3.59      |
| 73   | 0.8979                 | 269.4867              | 1.68      |
| 74   | 0.8818                 | 264.6547              | 1.39      |
| 75   | 0.8737                 | 262.2236              | 3.46      |
| 76   | 0.8491                 | 254.8404              | 1.25      |

# Compound 19

## <sup>13</sup>C NMR

| No. | (ppm)  | (Hz)    | Height |
|-----|--------|---------|--------|
| 1   | 13.83  | 1391.3  | 0.1898 |
| 2   | 13.86  | 1395.0  | 0.2098 |
| 3   | 20.01  | 2013.4  | 0.2019 |
| 4   | 20.31  | 2044.2  | 0.1925 |
| 5   | 21.48  | 2161.6  | 0.1219 |
| 6   | 30.18  | 3036.8  | 0.1621 |
| 7   | 30.38  | 3057.3  | 0.1648 |
| 8   | 33.52  | 3372.8  | 0.1310 |
| 9   | 40.78  | 4104.2  | 0.1254 |
| 10  | 41.52  | 4178.3  | 0.1198 |
| 11  | 42.91  | 4318.4  | 0.1134 |
| 12  | 45.37  | 4565.6  | 0.1200 |
| 13  | 51.65  | 5198.0  | 0.1185 |
| 14  | 55.84  | 5619.8  | 0.1549 |
| 15  | 55.92  | 5627.9  | 0.1837 |
| 16  | 76.72  | 7720.8  | 0.9885 |
| 17  | 77.04  | 7752.4  | 0.9837 |
| 18  | 77.36  | 7784.6  | 1.0000 |
| 19  | 102.89 | 10353.7 | 0.0708 |
| 20  | 111.33 | 11203.2 | 0.1288 |
| 21  | 111.98 | 11268.5 | 0.1298 |
| 22  | 120.80 | 12156.1 | 0.1613 |
| 23  | 131.49 | 13232.3 | 0.1185 |
| 24  | 147.70 | 14863.8 | 0.0797 |
| 25  | 148.95 | 14989.3 | 0.0795 |
| 26  | 148.98 | 14992.2 | 0.0928 |
| 27  | 151.29 | 15224.8 | 0.0908 |
| 28  | 151.37 | 15232.8 | 0.0883 |
| 29  | 153.84 | 15481.5 | 0.0889 |

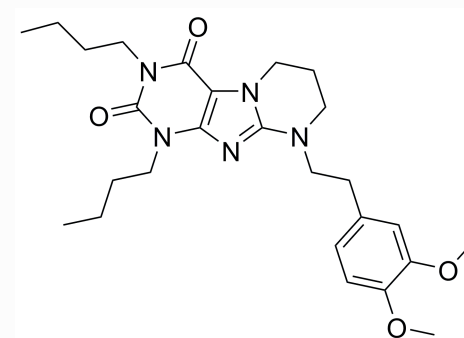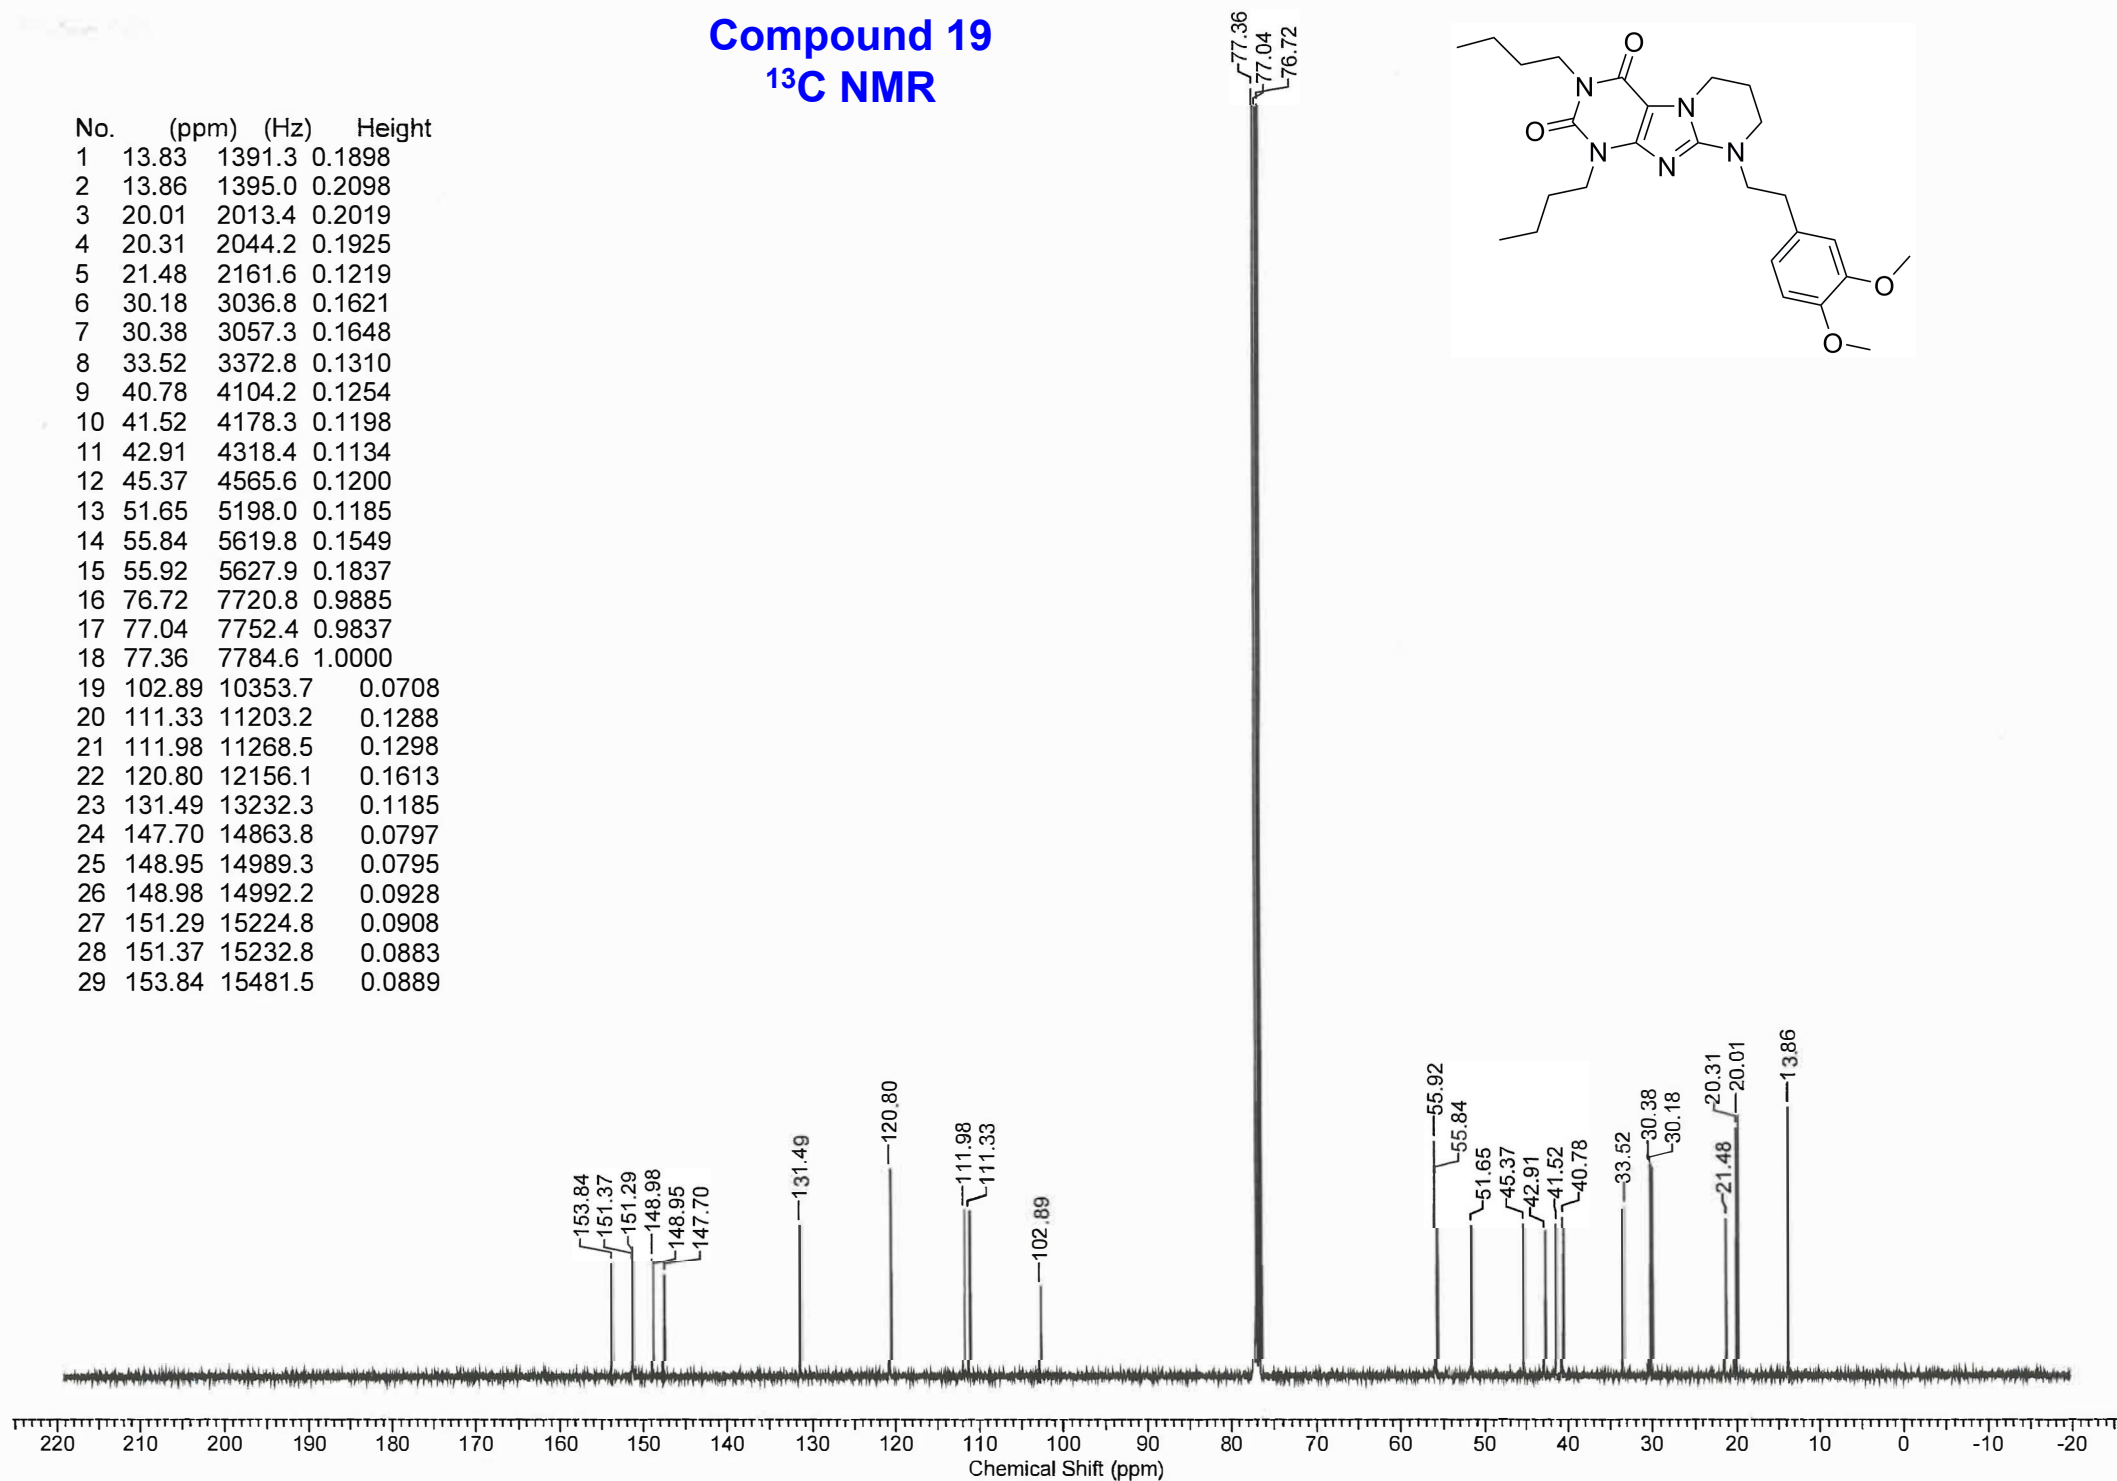

Supplement: s1 [file s1]
